# Supplementary material for: The ERA Registry Annual Report 2020: a summary
Source: PubMed Central journal article supplement — Clin Kidney J. 2023 Apr 21;16(8):1330–54. doi: 10.1093/ckj/sfad087 (PMC10387405; doi:10.1093/ckj/sfad087), 2023-04-21

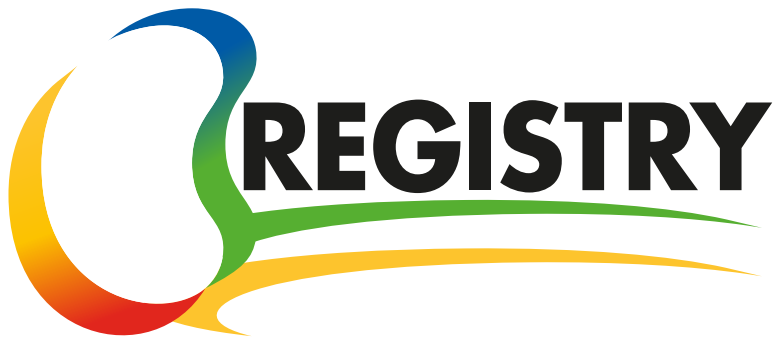

ERA  
Registry  
Annual  
Report  
2020

**Suggested Citation** ERA Registry: ERA Registry Annual Report 2020. Amsterdam UMC, location AMC, Department of Medical Informatics, Amsterdam, the Netherlands, 2022.

**Disclaimer** ERA, its Registry Committee, Amsterdam UMC; location AMC, and its department of Medical Informatics disclaim any express or implied warranty of fitness for the use of ERA Registry products and shall not be liable for any direct, indirect or consequential loss; personal injury; special or punitive damages; loss of profits, loss of savings and loss of revenue; loss of business, loss of reputation and loss of goodwill; and loss of data arising from the use of ERA Registry products.

ERA Registry  
Annual Report 2020

## **ERA Registry**

Amsterdam UMC, location AMC  
Department of Medical Informatics  
PO Box 22700  
1100 DE Amsterdam  
the Netherlands

Telephone +31 20 566 7637

E-mail [erareg@amsterdamumc.nl](mailto:erareg@amsterdamumc.nl)

Website [www.era-online.org/research-education/era-registry](http://www.era-online.org/research-education/era-registry)

## **ERA Registry Committee**

C Wanner, Germany (ERA President)

A Ortiz, Spain (Chairman)

P Ambühl, Switzerland

M Arici, Turkey

M Arnol, Slovenia

S Bakkaloglu, Turkey

PM Ferraro, Italy

J Helve, Finland

JE Sánchez-Álvarez, Spain

M Segelmark, Sweden

SS Sørensen, Denmark

E Vidal, Italy

## **ERA Registry Office Staff**

KJ Jager, epidemiologist (Managing Director)

ME Astley, epidemiologist

R Boenink, epidemiologist

BA Boerstra, epidemiologist

M Bonthuis, epidemiologist (for paediatric section)

NC Chesnaye, epidemiologist

R Cornet, medical informatician (advisor)

A Kramer, medical informatician

VS Stel, epidemiologist

AJ Weerstra, data manager

## Acknowledgements

The ERA Registry would like to thank the patients and staff of all the dialysis and transplant units who have contributed data via their national and regional renal registries. In addition, we would like to thank the following persons and organizations for their contribution to the work of the ERA Registry.

### For the provision of individual patient data

| Registry                                       | Contributors                                                                          |
|------------------------------------------------|---------------------------------------------------------------------------------------|
| Austria                                        | F Engler, J Kerschbaum, R Kramar, G Mayer, and the Austrian Society of Nephrology     |
| Belgium, Dutch-speaking                        | J De Meester                                                                          |
| Belgium, French-speaking                       | JM des Grottes and F Collart                                                          |
| Bosnia and Herzegovina                         | H Resić and E Mešić                                                                   |
| Denmark                                        | K Hommel                                                                              |
| Estonia                                        | Ü Pechter, M Ots-Rosenberg, and K Lilienthal                                          |
| Finland                                        | J Helve                                                                               |
| France                                         | M Lassalle and C Couchoud                                                             |
| Greece                                         | G Moustakas                                                                           |
| Iceland                                        | OS Indridason and R Pálsson                                                           |
| Montenegro                                     | M Ratkovic, D Radunović, and F Tomović                                                |
| Norway                                         | AV Reisaeter and A Åsberg                                                             |
| Romania                                        | G Mircescu, L Garneata, and E Podgoreanu                                              |
| Serbia                                         | M Lausevic, R Naumovic, all of the Serbian renal units, Serbian Society of Nephrology |
| Spain, Andalusia                               | P Castro de la Nuez (on behalf of all users of SICATA)                                |
| Spain, Aragon                                  | F Arribas Monzón                                                                      |
| Spain, Asturias                                | P Beltrán, M. Rodríguez, JR Quirós, and RERCA Working Group                           |
| Spain, Basque country                          | Á Magaz, J Aranzabal, M Rodrigo, and I Moína                                          |
| Spain, Canary Islands                          | S Trujillo Alemán, I Santana Gil and C Torres Medina                                  |
| Spain, Cantabria                               | JC Ruiz San Millán                                                                    |
| Spain, Castile and León                        | MA Palencia García and P Ucio Mingo                                                   |
| Spain, Castile-La Mancha                       | G Gutiérrez Ávila and I Moreno Alía                                                   |
| Spain, Catalonia                               | J Comas and J Tort                                                                    |
| Spain, Community of Madrid                     | MI Aparicio Madre and F Tornero Molina                                                |
| Spain, Extremadura                             | All the renal units (Nephrology and Dialysis) from Extremadura                        |
| Spain, Galicia                                 | E Bouzas-Caamaño                                                                      |
| Spain, La Rioja                                | E Huarte Loza, M Artamendi Larrañaga, and H Hernández Vargas                          |
| Spain, Murcia                                  | I Marín Sánchez and C Santiuste de Pablos                                             |
| Spain, Navarre                                 | MF Slon Roblero and J Manrique Escola                                                 |
| Spain, Valencian region                        | OL Rodríguez-Arévalo and O Zurriaga                                                   |
| Sweden                                         | KG Prütz, M Stendahl, M Evans, S Schön, T Lundgren, H Rydell, and M Segelmark         |
| Switzerland                                    | P Ambühl and R Guidotti                                                               |
| the Netherlands                                | L Heuveling and M ten Dam                                                             |
| United Kingdom, England/Northern Ireland/Wales | All the staff of the UK Renal Registry and of the renal units submitting data         |
| United Kingdom, Scotland                       | All of the Scottish renal units                                                       |

### For the provision of aggregated data

| Registry                | Contributors                                    |
|-------------------------|-------------------------------------------------|
| Albania                 | A Idrizi, M Rroji, and E Likaj                  |
| Belarus                 | K Komissarov, K Kamisarau and A Kalachyk        |
| Croatia                 | D Katicic and K Altabas                         |
| Cyprus                  | S Glyki, E Magiroudi and A Savvidou             |
| Czech Republic          | F Lopot, I Rychlík and L Francová               |
| Hungary                 | I Kulcsar, L Wagner and L Rosivall              |
| Israel                  | P Beckerman, L Keinan-Boker and R Dichtiar      |
| Italy (8 of 20 regions) | M Nordio, M Postorino and A Limido              |
| Kosovo                  | S Selmani and M Tolaj-Avdiu                     |
| Lithuania               | I Nedzelskiene, V Vainauskas and E Ziginiskiene |
| North Macedonia         | N Gjorgjievski and I Rambabova Bushljetikj      |
| Poland                  | A Debska-Slizien, P Jagodzinski and R Gellert   |
| Portugal                | A Galvão and A Ferreira                         |
| Russia                  | A Andrusev, H Zakharova and N Tomilina          |
| Slovakia                | I Lajdova, V Spustova and A Oksa                |
| Spain                   | B Mahillo Durán and Spanish Regional Registries |
| Turkey                  | N Seyahi, K Ates and G Süleymanlar              |

The ERA Registry is funded by the European Renal Association (ERA). In addition, we would like to thank Samar Abd ElHafeez in the AMC ERA Registry office for her contribution to the data collection and management.

## List of abbreviations

| <b>Abbreviation</b> | <b>Term</b>                                          |
|---------------------|------------------------------------------------------|
| APD                 | Automated peritoneal dialysis                        |
| CAKUT               | Congenital anomalies of the kidney and urinary tract |
| CAPD                | Continuous ambulatory peritoneal dialysis            |
| CI                  | Confidence interval                                  |
| DM                  | Diabetes mellitus                                    |
| ERA                 | European Renal Association                           |
| ESPN                | European Society for Paediatric Nephrology           |
| ESRD                | End-stage renal disease                              |
| ESRF                | End-stage renal failure                              |
| GN                  | Glomerulonephritis / sclerosis                       |
| HD                  | Haemodialysis                                        |
| HDF                 | Haemodiafiltration                                   |
| HF                  | Haemofiltration                                      |
| HT                  | Hypertension                                         |
| HUS                 | Haemolytic uraemic syndrome                          |
| KRT                 | Kidney replacement therapy                           |
| Misc                | Miscellaneous                                        |
| N                   | Number                                               |
| P25                 | Refers to the 25th percentile                        |
| P75                 | Refers to the 75th percentile                        |
| PD                  | Peritoneal dialysis                                  |
| PKD                 | Polycystic kidneys, adult type                       |
| Pmarp               | Per million age-related population                   |
| Pmp                 | Per million population                               |
| PN                  | Pyelonephritis                                       |
| PRD                 | Primary renal disease                                |
| RVD                 | Renal vascular disease                               |
| SD                  | Standard deviation                                   |
| Tx                  | Transplant                                           |
| Unkn                | Unknown                                              |

## Glossary

**EU28:** refers to the 28 countries of which on 1st July 2013 the European Union was comprised of. These countries are: Austria, Belgium, Bulgaria, Croatia, Cyprus, Czech Republic, Denmark, Estonia, Finland, France, Germany, Greece, Hungary, Ireland, Italy, Latvia, Lithuania, Luxembourg, Malta, the Netherlands, Poland, Portugal, Romania, Slovakia, Slovenia, Spain, Sweden, and the United Kingdom.

**Eurostat:** the statistical office of the European Union whose task is to provide the European Union with statistics at the European level that enable comparisons between countries and regions.

**Expected remaining lifetime:** is defined as the average number of years of life remaining for those who have reached a given age.

**Incidence:** the number of new cases during a specific time period. In this annual report this equates to the number of patients commencing kidney replacement therapy for end-stage renal disease during the calendar year on which this annual report is based.

**Kidney replacement therapy (KRT):** therapy used to replace the normal blood-filtering function of the kidneys. In this annual report kidney replacement therapy refers to the various dialysis modalities and to kidney transplantation (see Modality).

**Modality:** the method of kidney replacement therapy. Kidney replacement therapy is comprised of the following modalities: haemodialysis (HD), haemofiltration (HF), haemodiafiltration (HDF), automated peritoneal dialysis (APD), continuous ambulatory peritoneal dialysis (CAPD), and kidney transplantation (Tx). Kidney transplantation can be performed with a kidney from a living donor (LD) or from a deceased donor (DD).

**Per million age-related population (pmarp):** the incidence or prevalence pmarp is the observed incident or prevalent count for a specific age group divided by the general population of that age group and multiplied by one million.

**Per million population (pmp):** the incidence or prevalence pmp is the observed incident or prevalent count divided by the general population in that year and multiplied by one million.

**Percentage coverage:** coverage of the general population in a country or region by the registry of that country or region.

**Prevalence:** the number of people in a given population with a particular disease at a given time. In this annual report this equates to the number of patients receiving kidney replacement therapy for end-stage renal disease on 31<sup>st</sup> December 2020.

**Survival probability:** the probability that a person or a kidney transplant has survived up to a specified time point.

## **Brief content**

|                                                                         |            |
|-------------------------------------------------------------------------|------------|
| <b>Introduction</b>                                                     | <b>11</b>  |
| <b>Section A: Summary data and comparisons by primary renal disease</b> | <b>14</b>  |
| A1 INCIDENT PATIENTS ACCEPTED FOR KRT IN 2020, AT DAY 1                 | 15         |
| A2 INCIDENT PATIENTS ACCEPTED FOR KRT IN 2020, AT DAY 91                | 20         |
| A3 PREVALENT PATIENTS ON KRT IN 2020                                    | 21         |
| A4 KIDNEY TRANSPLANTS IN 2020                                           | 26         |
| A5 SURVIVAL PROBABILITY                                                 | 29         |
| A6 EXPECTED REMAINING LIFETIMES                                         | 31         |
| A7 COMPARISONS BY PRIMARY RENAL DISEASE FOR 2020                        | 32         |
| <b>Section B: Individual patient data reference tables</b>              | <b>38</b>  |
| B1 AFFILIATED REGISTRY INFORMATION FOR 2020                             | 39         |
| B2 INCIDENT PATIENTS ACCEPTED FOR KRT IN 2020, AT DAY 1                 | 40         |
| B3 INCIDENT PATIENTS ACCEPTED FOR KRT IN 2020, AT DAY 91                | 51         |
| B4 PREVALENT PATIENTS ON KRT IN 2020                                    | 62         |
| B5 KIDNEY TRANSPLANTS IN 2020                                           | 73         |
| B6 SURVIVAL PROBABILITY                                                 | 76         |
| B7 EXPECTED REMAINING LIFETIMES                                         | 93         |
| <b>Section C: Aggregated data reference tables</b>                      | <b>94</b>  |
| C1 AFFILIATED REGISTRY INFORMATION FOR 2020                             | 95         |
| C2 INCIDENT PATIENTS ACCEPTED FOR KRT IN 2020, AT DAY 1                 | 96         |
| C3 INCIDENT PATIENTS ACCEPTED FOR KRT IN 2020, AT DAY 91                | 104        |
| C4 PREVALENT PATIENTS ON KRT IN 2020                                    | 112        |
| C5 KIDNEY TRANSPLANTS IN 2020                                           | 120        |
| <b>Section D: Paediatric data reference tables</b>                      | <b>122</b> |
| D1 GENERAL POPULATION AGE DISTRIBUTION                                  | 123        |
| D2 INCIDENT PATIENTS ACCEPTED FOR KRT, AT DAY 1                         | 124        |
| D3 PREVALENT PATIENTS ON KRT                                            | 126        |
| <b>Methods</b>                                                          | <b>128</b> |
| <b>Appendices</b>                                                       | <b>137</b> |



# Table of Contents

|                                                                                                                                                                                   |           |
|-----------------------------------------------------------------------------------------------------------------------------------------------------------------------------------|-----------|
| <b>Introduction</b>                                                                                                                                                               | <b>11</b> |
| Section overview                                                                                                                                                                  | 13        |
| New to this edition                                                                                                                                                               | 13        |
| ERA Registry website                                                                                                                                                              | 13        |
| ESPN/ERA Registry website                                                                                                                                                         | 13        |
| <br>                                                                                                                                                                              |           |
| <b>Section A: Summary data and comparisons by primary renal disease</b>                                                                                                           | <b>14</b> |
| <br>                                                                                                                                                                              |           |
| <b>A1 INCIDENT PATIENTS ACCEPTED FOR KRT IN 2020, AT DAY 1</b>                                                                                                                    |           |
| <b>Table A.1.1</b> Summary data on the incidence of KRT in 2020, unadjusted                                                                                                       | 15        |
| <b>Figure A.1.1</b> Incidence per million population by country / region, unadjusted                                                                                              | 16        |
| <b>Figure A.1.2</b> Incidence per million population by country / region, unadjusted and adjusted                                                                                 | 17        |
| <b>Figure A.1.3</b> Age, sex, and primary renal disease distribution by type of data provided, unadjusted                                                                         | 18        |
| <b>Figure A.1.4</b> Treatment modality distribution by age, sex and primary renal disease, unadjusted                                                                             | 19        |
| <br>                                                                                                                                                                              |           |
| <b>A2 INCIDENT PATIENTS ACCEPTED FOR KRT IN 2020, AT DAY 91</b>                                                                                                                   |           |
| <b>Figure A.2.1</b> Treatment modality distribution by age, sex and primary renal disease, unadjusted                                                                             | 20        |
| <br>                                                                                                                                                                              |           |
| <b>A3 PREVALENT PATIENTS ON KRT IN 2020</b>                                                                                                                                       |           |
| <b>Table A.3.1</b> Summary data on the prevalence of KRT on 31 December 2020, unadjusted                                                                                          | 21        |
| <b>Figure A.3.1</b> Prevalence per million population by country / region, unadjusted                                                                                             | 22        |
| <b>Figure A.3.2</b> Prevalence per million population by country / region, unadjusted and adjusted                                                                                | 23        |
| <b>Figure A.3.3</b> Age, sex, and primary renal disease distribution by type of data provided, unadjusted                                                                         | 24        |
| <b>Figure A.3.4</b> Treatment modality distribution by age, sex and primary renal disease, unadjusted                                                                             | 25        |
| <br>                                                                                                                                                                              |           |
| <b>A4 KIDNEY TRANSPLANTS IN 2020</b>                                                                                                                                              |           |
| <b>Figure A.4.1</b> Kidney transplant counts and per million population by country / region, unadjusted                                                                           | 26        |
| <b>Figure A.4.2</b> Kidney transplants per million population by donor type and by country / region, unadjusted                                                                   | 27        |
| <b>Figure A.4.3</b> Donor type distribution by type of data provided, unadjusted                                                                                                  | 28        |
| <br>                                                                                                                                                                              |           |
| <b>A5 SURVIVAL PROBABILITY</b>                                                                                                                                                    |           |
| <b>Table A.5.1</b> One-, two- and five-year survival probabilities by treatment modality and cohort                                                                               | 29        |
| <b>Figure A.5.1</b> Adjusted patient survival by modality: Incident dialysis patients                                                                                             | 30        |
| <b>Figure A.5.2</b> Adjusted patient survival by donor type: Patients receiving a first kidney transplant                                                                         | 30        |
| <br>                                                                                                                                                                              |           |
| <b>A6 EXPECTED REMAINING LIFETIMES</b>                                                                                                                                            |           |
| <b>Figure A.6.1</b> Expected remaining lifetimes (years) of the general population (cohort 2016-2020) and of prevalent dialysis and kidney transplant patients (cohort 2016-2020) | 31        |
| <br>                                                                                                                                                                              |           |
| <b>A7 COMPARISONS BY PRIMARY RENAL DISEASE FOR 2020</b>                                                                                                                           |           |
| <b>Figure A.7.1</b> Incidence per million population by primary renal disease, unadjusted                                                                                         | 32        |
| <b>Figure A.7.2</b> Age, sex and treatment modality distribution by primary renal disease in incident patients, unadjusted                                                        | 33        |
| <b>Figure A.7.3</b> Prevalence per million population by primary renal disease, unadjusted                                                                                        | 34        |
| <b>Figure A.7.4</b> Age, sex and treatment modality distribution by primary renal disease in prevalent patients, unadjusted                                                       | 35        |
| <b>Figure A.7.5</b> Kidney transplants per million population by primary renal disease, unadjusted                                                                                | 36        |
| <b>Figure A.7.6</b> Donor type distribution by primary renal disease in kidney transplant recipients                                                                              | 36        |
| <b>Figure A.7.7</b> Patient survival probability by primary renal disease: Incident dialysis patients                                                                             | 37        |
| <b>Figure A.7.8</b> Patient survival probability by primary renal disease: Patients receiving a first kidney transplant                                                           | 37        |

**B1 AFFILIATED REGISTRY INFORMATION FOR 2020**

|                    |                                                     |    |
|--------------------|-----------------------------------------------------|----|
| <b>Table B.1.1</b> | General population data and number of renal centres | 39 |
|--------------------|-----------------------------------------------------|----|

**B2 INCIDENT PATIENTS ACCEPTED FOR KRT IN 2020, AT DAY 1**

|                     |                                                                                       |    |
|---------------------|---------------------------------------------------------------------------------------|----|
| <b>Table B.2.1</b>  | Incident counts and percentages by age and sex                                        | 40 |
| <b>Table B.2.2</b>  | Incidence per million (age-related) population by age and sex, unadjusted             | 41 |
| <b>Table B.2.3</b>  | Sex, mean age, and median age of incident patients                                    | 42 |
| <b>Table B.2.4</b>  | Incidence per million population, adjusted                                            | 43 |
| <b>Table B.2.5</b>  | Incidence per million population and percentages by primary renal disease, unadjusted | 44 |
| <b>Table B.2.6</b>  | Incidence per million population by primary renal disease, adjusted                   | 45 |
| <b>Table B.2.7</b>  | Incident counts by treatment modality                                                 | 46 |
| <b>Table B.2.8</b>  | Incidence per million population by treatment modality, unadjusted                    | 47 |
| <b>Table B.2.9</b>  | Incidence per million population by treatment modality, adjusted                      | 48 |
| <b>Table B.2.10</b> | Treatment modality distribution, unadjusted                                           | 49 |
| <b>Table B.2.11</b> | Treatment modality distribution by age, sex, and primary renal disease, unadjusted    | 50 |

**B3 INCIDENT PATIENTS ACCEPTED FOR KRT IN 2020, AT DAY 91**

|                     |                                                                                       |    |
|---------------------|---------------------------------------------------------------------------------------|----|
| <b>Table B.3.1</b>  | Incident counts and percentages by age and sex                                        | 51 |
| <b>Table B.3.2</b>  | Incidence per million (age-related) population by age and sex, unadjusted             | 52 |
| <b>Table B.3.3</b>  | Sex, mean age, and median age of incident patients                                    | 53 |
| <b>Table B.3.4</b>  | Incidence per million population, adjusted                                            | 54 |
| <b>Table B.3.5</b>  | Incidence per million population and percentages by primary renal disease, unadjusted | 55 |
| <b>Table B.3.6</b>  | Incidence per million population by primary renal disease, adjusted                   | 56 |
| <b>Table B.3.7</b>  | Incident counts by treatment modality                                                 | 57 |
| <b>Table B.3.8</b>  | Incidence per million population by treatment modality, unadjusted                    | 58 |
| <b>Table B.3.9</b>  | Incidence per million population by treatment modality, adjusted                      | 59 |
| <b>Table B.3.10</b> | Treatment modality distribution, unadjusted                                           | 60 |
| <b>Table B.3.11</b> | Treatment modality distribution by age, sex, and primary renal disease, unadjusted    | 61 |

**B4 PREVALENT PATIENTS ON KRT IN 2020**

|                     |                                                                                        |    |
|---------------------|----------------------------------------------------------------------------------------|----|
| <b>Table B.4.1</b>  | Prevalent counts and percentages by age and sex                                        | 62 |
| <b>Table B.4.2</b>  | Prevalence per million (age-related) population by age and sex, unadjusted             | 63 |
| <b>Table B.4.3</b>  | Sex, mean age, and median age                                                          | 64 |
| <b>Table B.4.4</b>  | Prevalence per million population, adjusted                                            | 65 |
| <b>Table B.4.5</b>  | Prevalence per million population and percentages by primary renal disease, unadjusted | 66 |
| <b>Table B.4.6</b>  | Prevalence per million population by primary renal disease, adjusted                   | 67 |
| <b>Table B.4.7</b>  | Prevalent counts by treatment modality                                                 | 68 |
| <b>Table B.4.8</b>  | Prevalence per million population by treatment modality, unadjusted                    | 69 |
| <b>Table B.4.9</b>  | Prevalence per million population by treatment modality, adjusted                      | 70 |
| <b>Table B.4.10</b> | Treatment modality distribution, unadjusted                                            | 71 |
| <b>Table B.4.11</b> | Treatment modality distribution by age, sex, and primary renal disease, unadjusted     | 72 |

**B5 KIDNEY TRANSPLANTS IN 2020**

|                    |                                                                     |    |
|--------------------|---------------------------------------------------------------------|----|
| <b>Table B.5.1</b> | Kidney transplant counts and percentages by donor type              | 73 |
| <b>Table B.5.2</b> | Kidney transplants per million population by donor type, unadjusted | 74 |
| <b>Table B.5.3</b> | Sex, mean age, and median age of kidney transplant recipients       | 75 |

**B6 SURVIVAL PROBABILITY****Patient Survival on KRT (cohort 2011-2015 and cohort 2014-2018)**

|                    |                                                |    |
|--------------------|------------------------------------------------|----|
| <b>Table B.6.1</b> | Incident KRT patients, from day 1, unadjusted  | 76 |
| <b>Table B.6.2</b> | Incident KRT patients, from day 1, adjusted    | 77 |
| <b>Table B.6.3</b> | Incident KRT patients, from day 91, unadjusted | 78 |
| <b>Table B.6.4</b> | Incident KRT patients, from day 91, adjusted   | 79 |

**Patient Survival on Dialysis (cohort 2011-2015 and cohort 2014-2018)**

|                    |                                                     |    |
|--------------------|-----------------------------------------------------|----|
| <b>Table B.6.5</b> | Incident dialysis patients, from day 1, unadjusted  | 80 |
| <b>Table B.6.6</b> | Incident dialysis patients, from day 1, adjusted    | 81 |
| <b>Table B.6.7</b> | Incident dialysis patients, from day 91, unadjusted | 82 |
| <b>Table B.6.8</b> | Incident dialysis patients, from day 91, adjusted   | 83 |

|                                                                                               |                                                                                                                                                               |    |
|-----------------------------------------------------------------------------------------------|---------------------------------------------------------------------------------------------------------------------------------------------------------------|----|
| <b>Patient Survival after First Kidney Transplant (cohort 2011-2015 and cohort 2014-2018)</b> |                                                                                                                                                               |    |
| <b>Table B.6.9</b>                                                                            | First transplant patients (deceased donor), from day of transplant, unadjusted                                                                                | 84 |
| <b>Table B.6.10</b>                                                                           | First transplant patients (deceased donor), from day of transplant, adjusted                                                                                  | 85 |
| <b>Table B.6.11</b>                                                                           | First transplant patients (living donor), from day of transplant, unadjusted                                                                                  | 86 |
| <b>Table B.6.12</b>                                                                           | First transplant patients (living donor), from day of transplant, adjusted                                                                                    | 87 |
| <b>Graft Survival after First Kidney Transplant (cohort 2011-2015 and cohort 2014-2018)</b>   |                                                                                                                                                               |    |
| <b>Table B.6.13</b>                                                                           | First graft (deceased donor), from day of transplant, unadjusted                                                                                              | 88 |
| <b>Table B.6.14</b>                                                                           | First graft (deceased donor), from day of transplant, adjusted                                                                                                | 89 |
| <b>Table B.6.15</b>                                                                           | First graft (living donor), from day of transplant, unadjusted                                                                                                | 90 |
| <b>Table B.6.16</b>                                                                           | First graft (living donor), from day of transplant, adjusted                                                                                                  | 91 |
| <b>Patient Survival by Primary Renal Disease and Modality (cohort 2011-2015)</b>              |                                                                                                                                                               |    |
| <b>Figure B.6.1</b>                                                                           | Patient survival by primary renal disease: Incident KRT patients                                                                                              | 92 |
| <b>Figure B.6.2</b>                                                                           | Patient survival by modality: Incident dialysis patients                                                                                                      | 92 |
| <b>Figure B.6.3</b>                                                                           | Patient survival by donor type: Patients receiving a first kidney transplant                                                                                  | 92 |
| <b>B7 EXPECTED REMAINING LIFETIMES</b>                                                        |                                                                                                                                                               |    |
| <b>Table B.7.1</b>                                                                            | Expected remaining lifetimes (years) of the general population (cohort 2016-2020) and of prevalent dialysis and kidney transplant patients (cohort 2016-2020) | 93 |

## **Section C: Aggregated data reference tables 94**

|                                                                 |                                                                                        |     |
|-----------------------------------------------------------------|----------------------------------------------------------------------------------------|-----|
| <b>C1 AFFILIATED REGISTRY INFORMATION FOR 2020</b>              |                                                                                        |     |
| <b>Table C.1.1</b>                                              | General population data and number of renal centres                                    | 95  |
| <b>C2 INCIDENT PATIENTS ACCEPTED FOR KRT IN 2020, AT DAY 1</b>  |                                                                                        |     |
| <b>Table C.2.1</b>                                              | Incident counts and percentages by age and sex                                         | 96  |
| <b>Table C.2.2</b>                                              | Incidence per million (age-related) population by age and sex, unadjusted              | 97  |
| <b>Table C.2.3</b>                                              | Sex, mean age, and median age of incident patients                                     | 98  |
| <b>Table C.2.4</b>                                              | Incidence per million population, adjusted                                             | 99  |
| <b>Table C.2.5</b>                                              | Incidence per million population and percentages by primary renal disease, unadjusted  | 100 |
| <b>Table C.2.6</b>                                              | Incident counts by treatment modality                                                  | 101 |
| <b>Table C.2.7</b>                                              | Incidence per million population by treatment modality, unadjusted                     | 102 |
| <b>Table C.2.8</b>                                              | Treatment modality distribution, unadjusted                                            | 103 |
| <b>C3 INCIDENT PATIENTS ACCEPTED FOR KRT IN 2020, AT DAY 91</b> |                                                                                        |     |
| <b>Table C.3.1</b>                                              | Incident counts and percentages by age and sex                                         | 104 |
| <b>Table C.3.2</b>                                              | Incidence per million (age-related) population by age and sex, unadjusted              | 105 |
| <b>Table C.3.3</b>                                              | Sex, mean age, and median age of incident patients                                     | 106 |
| <b>Table C.3.4</b>                                              | Incidence per million population, adjusted                                             | 107 |
| <b>Table C.3.5</b>                                              | Incidence per million population and percentages by primary renal disease, unadjusted  | 108 |
| <b>Table C.3.6</b>                                              | Incident counts by treatment modality                                                  | 109 |
| <b>Table C.3.7</b>                                              | Incidence per million population by treatment modality, unadjusted                     | 110 |
| <b>Table C.3.8</b>                                              | Treatment modality distribution, unadjusted                                            | 111 |
| <b>C4 PREVALENT PATIENTS ON KRT IN 2020</b>                     |                                                                                        |     |
| <b>Table C.4.1</b>                                              | Prevalent counts and percentages by age and sex                                        | 112 |
| <b>Table C.4.2</b>                                              | Prevalence per million (age-related) population by age and sex, unadjusted             | 113 |
| <b>Table C.4.3</b>                                              | Sex, mean age, and median age                                                          | 114 |
| <b>Table C.4.4</b>                                              | Prevalence per million population, adjusted                                            | 115 |
| <b>Table C.4.5</b>                                              | Prevalence per million population and percentages by primary renal disease, unadjusted | 116 |
| <b>Table C.4.6</b>                                              | Prevalent counts by treatment modality                                                 | 117 |
| <b>Table C.4.7</b>                                              | Prevalence per million population by treatment modality, unadjusted                    | 118 |
| <b>Table C.4.8</b>                                              | Treatment modality distribution, unadjusted                                            | 119 |
| <b>C5 KIDNEY TRANSPLANTS IN 2020</b>                            |                                                                                        |     |
| <b>Table C.5.1</b>                                              | Kidney transplant counts and percentages by donor type                                 | 120 |
| <b>Table C.5.2</b>                                              | Kidney transplants per million population by donor type, unadjusted                    | 121 |

## Section D: Paediatric data reference tables

122

### D1 GENERAL POPULATION AGE DISTRIBUTION

|                    |                                   |     |
|--------------------|-----------------------------------|-----|
| <b>Table D.1.1</b> | Population covered (in thousands) | 123 |
|--------------------|-----------------------------------|-----|

### D2 INCIDENT PATIENTS ACCEPTED FOR KRT, AT DAY 1

|                    |                                                                                     |     |
|--------------------|-------------------------------------------------------------------------------------|-----|
| <b>Table D.2.1</b> | Incident counts by age and cohort                                                   | 124 |
| <b>Table D.2.2</b> | Incident counts by age, treatment modality, and cohort                              | 124 |
| <b>Table D.2.3</b> | Incident counts by age and primary renal disease                                    | 124 |
| <b>Table D.2.4</b> | Incidence per million age-related population by age and cohort                      | 125 |
| <b>Table D.2.5</b> | Incidence per million age-related population by age, treatment modality, and cohort | 125 |
| <b>Table D.2.6</b> | Incidence per million age-related population by age and primary renal disease       | 125 |

### D3 PREVALENT PATIENTS ON KRT

|                    |                                                                                      |     |
|--------------------|--------------------------------------------------------------------------------------|-----|
| <b>Table D.3.1</b> | Prevalent counts by age and cohort                                                   | 126 |
| <b>Table D.3.2</b> | Prevalent counts by age, treatment modality, and cohort                              | 126 |
| <b>Table D.3.3</b> | Prevalent counts by age and primary renal disease                                    | 126 |
| <b>Table D.3.4</b> | Prevalence per million age-related population by age and cohort                      | 127 |
| <b>Table D.3.5</b> | Prevalence per million age-related population by age, treatment modality, and cohort | 127 |
| <b>Table D.3.6</b> | Prevalence per million age-related population by age and primary renal disease       | 127 |

## Methods

128

|                                        |     |
|----------------------------------------|-----|
| <b>Data collection and preparation</b> | 129 |
| <b>Coding systems</b>                  | 132 |
| <b>Statistical analyses</b>            | 132 |
| <b>Bibliography</b>                    | 136 |

## Appendices

137

|                                                                                            |     |
|--------------------------------------------------------------------------------------------|-----|
| <b>Appendix 1 - Grouping of primary renal diseases</b>                                     | 138 |
| <b>Appendix 2 - Grouping of primary renal disease codes 2018</b>                           | 139 |
| <b>Appendix 3 - Grouping of causes of death</b>                                            | 144 |
| <b>Appendix 4 - Event type codes</b>                                                       | 145 |
| <b>Appendix 5 - Renal registries contributing data for the different types of analyses</b> | 146 |

## **Introduction**

**Figure 1: National and regional renal registries that contributed data to this annual report**

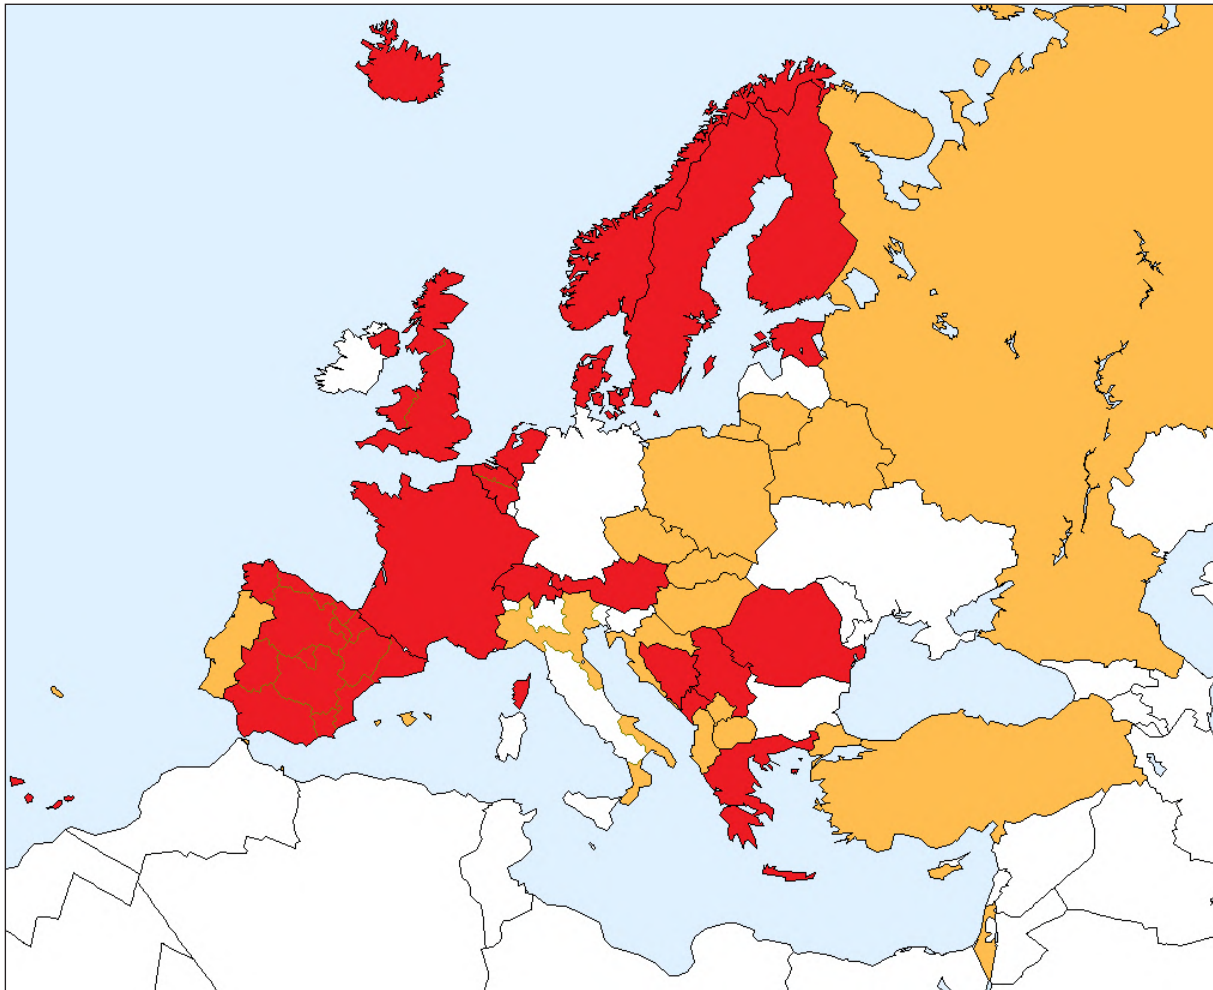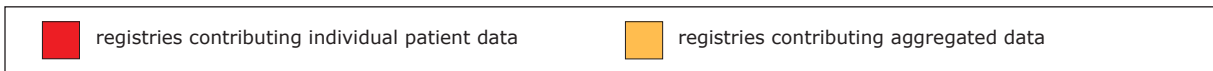

|  |                                                                                                                                                                                                                                                                |                                                                                                                                                                                                                                                                 |
|--|----------------------------------------------------------------------------------------------------------------------------------------------------------------------------------------------------------------------------------------------------------------|-----------------------------------------------------------------------------------------------------------------------------------------------------------------------------------------------------------------------------------------------------------------|
|  | AL Albania<br>AT Austria<br>BA Bosnia and Herzegovina<br>BE Belgium<br>BY Belarus<br>CH Switzerland<br>CY Cyprus<br>CZ Czech Republic<br>DK Denmark<br>EE Estonia<br>ES Spain<br>FI Finland<br>FR France<br>GR Greece<br>HR Croatia<br>HU Hungary<br>IL Israel | IS Iceland<br>IT Italy<br>LT Lithuania<br>ME Montenegro<br>MK North Macedonia<br>NL the Netherlands<br>NO Norway<br>PL Poland<br>PT Portugal<br>RO Romania<br>RS Serbia<br>RU Russia<br>SE Sweden<br>SK Slovakia<br>TR Turkey<br>UK United Kingdom<br>XK Kosovo |
|--|----------------------------------------------------------------------------------------------------------------------------------------------------------------------------------------------------------------------------------------------------------------|-----------------------------------------------------------------------------------------------------------------------------------------------------------------------------------------------------------------------------------------------------------------|

## **I Introduction**

The ERA Registry collects data on kidney replacement therapy (KRT) via the national and regional renal registries in Europe and countries bordering the Mediterranean Sea. For this 2020 Annual Report data sets from 52 national or regional renal registries in 34 countries were used. The reference tables are presented in two parts: Section B relates to individual patient data from 35 national and regional registries from 18 countries (shown in red in Figure 1), whereas Section C relates to 17 national and regional registries from 17 countries providing aggregated data (shown in orange in Figure 1).

### **Section overview**

In Section A, figures summarizing the data from all participating registries are presented. Section B contains data on the incidence and prevalence of KRT and on the kidney transplant activity, the survival and expected remaining lifetimes from registries providing individual patient data, while Section C covers data on the incidence and prevalence and kidney transplant activity from the countries and regions providing aggregated data. The incidence and prevalence of KRT in paediatric patients are described in Section D, and are based on data from registries providing individual paediatric patient data. The Methods section describes the procedures used, including data collection and preparation, definitions, the coding systems, and the statistical methods.

### **New to this edition**

This year summary figures on comparisons by primary renal disease were added to Section A. In A7 the incidence, prevalence, kidney transplant activity and survival are presented for eight primary renal disease groups separately.

### **ERA Registry website**

The ERA Registry annual reports and other information about the Registry can be downloaded from the ERA website: [www.era-online.org/research-education/era-registry](http://www.era-online.org/research-education/era-registry). Slides based on the information in this annual report will be presented on the website. In addition, the website includes a repository of educational publications and a link to the 2018 version of the ERA Registry Primary Renal Disease Codes.

### **ESPN/ERA Registry website**

Information on the activities of the European Society for Paediatric Nephrology (ESPN)/ERA Registry and on paediatric registries in general can be found on the ESPN/ERA Registry website: [www.espn-reg.org](http://www.espn-reg.org). In addition, the ESPN/ERA Registry annual reports can be downloaded from this website.

## **Section A: Summary data and comparisons by primary renal disease**



**A1 INCIDENT PATIENTS ACCEPTED FOR KRT IN 2020, AT DAY 1**

**Table A.1.1**  
**Summary data on the incidence of KRT in 2020, unadjusted**

|                                  | General population covered by the registry in thousands | Incidence in 2020, at day 1 |         |          |            |       |        |
|----------------------------------|---------------------------------------------------------|-----------------------------|---------|----------|------------|-------|--------|
|                                  |                                                         | All N                       | All Pmp | Mean Age | Median Age | DM N  | DM Pmp |
| Albania                          | 2818                                                    | 368                         | 131     | 62.5     | 65.0       | 84    | 30     |
| Austria §                        | 8901                                                    | 1085                        | 122     | 65.0     | 68.6       | 272   | 31     |
| Belarus //                       | 9380                                                    | 696                         | 74      |          |            | 145   | 15     |
| Belgium, Dutch-speaking *        | 6654                                                    | 1156                        | 174     | 71.0     | 73.5       | 236   | 35     |
| Belgium, French-speaking *       | 4890                                                    | 944                         | 193     | 67.6     | 69.6       | 208   | 43     |
| Bosnia and Herzegovina           | 3531                                                    | 408                         | 116     | 63.0     | 65.0       | 107   | 30     |
| Croatia †                        | 3441                                                    | 376                         | 109     | 69.1     | 71.0       | 105   | 31     |
| Cyprus                           | 888                                                     | 242                         | 273     | 70.0     | 72.0       | 101   | 114    |
| Czech Republic †                 | 10488                                                   | 2230                        | 213     |          |            |       |        |
| Denmark                          | 5888                                                    | 707                         | 120     | 64.3     | 67.1       | 193   | 33     |
| Estonia                          | 1330                                                    | 76                          | 57      | 60.2     | 63.4       | 18    | 14     |
| Finland                          | 5530                                                    | 522                         | 94      | 61.0     | 64.6       | 175   | 32     |
| France                           | 67488                                                   | 10696                       | 158     | 67.5     | 70.5       | 2486  | 37     |
| Greece                           | 10699                                                   | 2749                        | 257     | 71.5     | 74.2       | 659   | 62     |
| Hungary                          | 9672                                                    | 1923                        | 199     | 63.7     |            | 527   | 54     |
| Iceland                          | 366                                                     | 38                          | 104     | 65.3     | 72.2       | 5     | 14     |
| Israel                           | 9215                                                    | 1797                        | 195     | 67.0     | 69.2       | 804   | 87     |
| Italy (8 of 20 regions)          | 21471                                                   | 3405                        | 159     | 68.6     | 71.5       | 520   | 24     |
| Kosovo                           | 1688                                                    | 214                         | 127     | 61.1     | 64.0       | 68    | 40     |
| Lithuania                        | 2794                                                    | 242                         | 87      | 60.8     | 62.6       | 39    | 14     |
| Montenegro *                     | 621                                                     | 75                          | 121     | 61.3     | 63.0       | 14    | 23     |
| North Macedonia                  | 2069                                                    | 381                         | 184     | 63.9     | 66.0       | 96    | 46     |
| Norway                           | 5379                                                    | 543                         | 101     | 62.3     | 65.9       | 90    | 17     |
| Poland                           | 38354                                                   | 4781                        | 125     |          |            | 1484  | 39     |
| Portugal ¶                       | 10298                                                   | 2361                        | 229     |          |            | 773   | 75     |
| Romania                          | 18302                                                   | 2990                        | 163     | 62.2     | 64.6       | 378   | 21     |
| Russia †                         | 143248                                                  | 12103                       | 84      |          |            | 2900  | 20     |
| Serbia                           | 6209                                                    | 474                         | 76      | 60.3     | 63.1       | 138   | 22     |
| Slovakia †                       | 4324                                                    | 540                         | 125     | 64.4     | 66.0       | 163   | 38     |
| Spain (All)                      | 47451                                                   | 6643                        | 140     | 63.8     | 68.3       | 1668  | 35     |
| Spain, Andalusia                 | 8490                                                    | 1185                        | 140     | 64.4     | 67.7       | 316   | 37     |
| Spain, Aragon                    | 1331                                                    | 182                         | 137     | 64.5     | 68.2       | 46    | 35     |
| Spain, Asturias                  | 1016                                                    | 170                         | 167     | 67.1     | 69.6       | 50    | 49     |
| Spain, Basque country            | 2188                                                    | 288                         | 132     | 65.4     | 69.3       | 73    | 33     |
| Spain, Canary Islands            | 2241                                                    | 382                         | 170     | 64.0     | 66.5       | 126   | 56     |
| Spain, Cantabria *               | 583                                                     | 73                          | 125     | 65.4     | 67.0       | 21    | 36     |
| Spain, Castile and León *        | 2395                                                    | 285                         | 119     | 69.0     | 70.9       | 70    | 29     |
| Spain, Castile-La Mancha *       | 2047                                                    | 215                         | 105     | 65.1     | 66.2       | 62    | 30     |
| Spain, Catalonia                 | 7780                                                    | 1336                        | 172     | 66.8     | 70.4       | 255   | 33     |
| Spain, Community of Madrid       | 6780                                                    | 745                         | 110     | 64.5     | 68.3       | 195   | 29     |
| Spain, Extremadura               | 1064                                                    | 150                         | 141     | 65.9     | 66.7       | 48    | 45     |
| Spain, Galicia                   | 2700                                                    | 393                         | 146     | 67.5     | 69.6       | 109   | 40     |
| Spain, La Rioja                  | 316                                                     | 33                          | 104     | 68.2     | 69.2       | 6     | 19     |
| Spain, Murcia                    | 1511                                                    | 212                         | 140     | 65.0     | 66.9       | 49    | 32     |
| Spain, Navarre *                 | 657                                                     | 70                          | 107     | 63.4     | 68.7       | 26    | 40     |
| Spain, Valencian region          | 5057                                                    | 773                         | 153     | 66.5     | 70.3       | 177   | 35     |
| Sweden                           | 10353                                                   | 1137                        | 110     | 64.0     | 68.5       | 281   | 27     |
| Switzerland                      | 8638                                                    | 846                         | 98      | 65.2     | 68.9       | 159   | 18     |
| the Netherlands                  | 16395                                                   | 1861                        | 114     | 63.9     | 67.7       | 389   | 24     |
| Turkey ‡                         | 83614                                                   | 11596                       | 139     |          |            | 707   | 45     |
| United Kingdom, England          | 56550                                                   | 6097                        | 108     | 61.0     | 63.5       | 1618  | 29     |
| United Kingdom, Northern Ireland | 1896                                                    | 206                         | 109     | 60.1     | 64.0       | 39    | 21     |
| United Kingdom, Scotland         | 5466                                                    | 542                         | 99      | 60.0     | 63.0       | 161   | 29     |
| United Kingdom, Wales            | 3170                                                    | 356                         | 112     | 61.5     | 65.4       | 92    | 29     |
| All countries                    | 654932                                                  | 83972                       | 128     | 65.1     | 65.6       | 18068 | 31     |

DM = diabetes mellitus as primary renal disease

When cells are left empty, the data are unavailable and could not be used for the calculation of the summary data

§ The incidence is underestimated by approximately 1% due to one hemodialysis centre not submitting data

// Patients younger than 18 years of age are not reported

\* Patients younger than 20 years of age are not reported: the true incidence counts are therefore slightly higher than the counts reported here

† Data include dialysis patients only

¶ Data on primary renal disease are available for dialysis patients only (99.1% of total N=2361)

‡ Data on the incidence of primary renal disease (DM) is based on 2180 dialysis patients (18.8% of total)

Figure A.1.1  
**Incidence per million population by country / region, unadjusted**  
*at day 1*

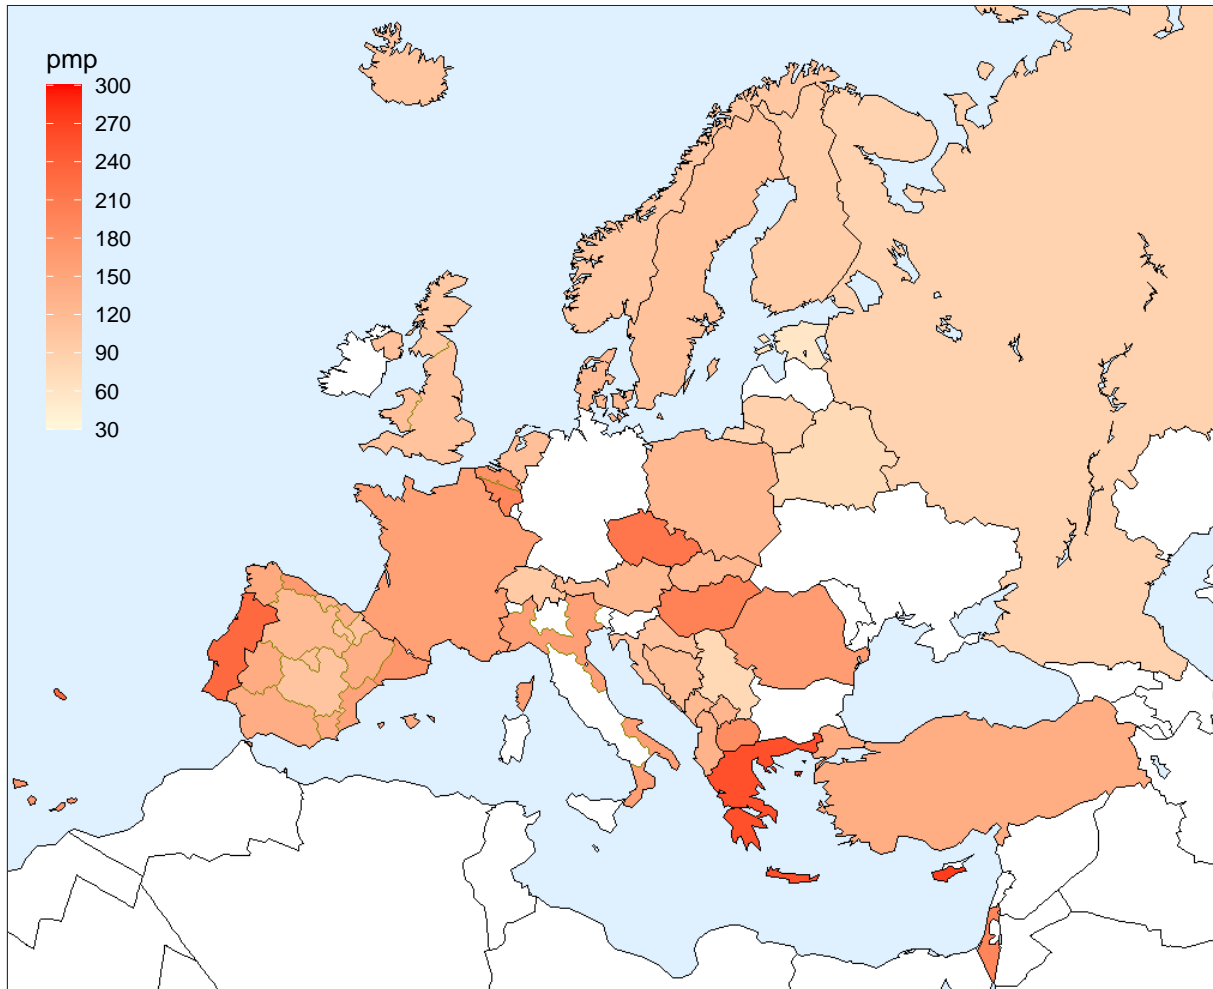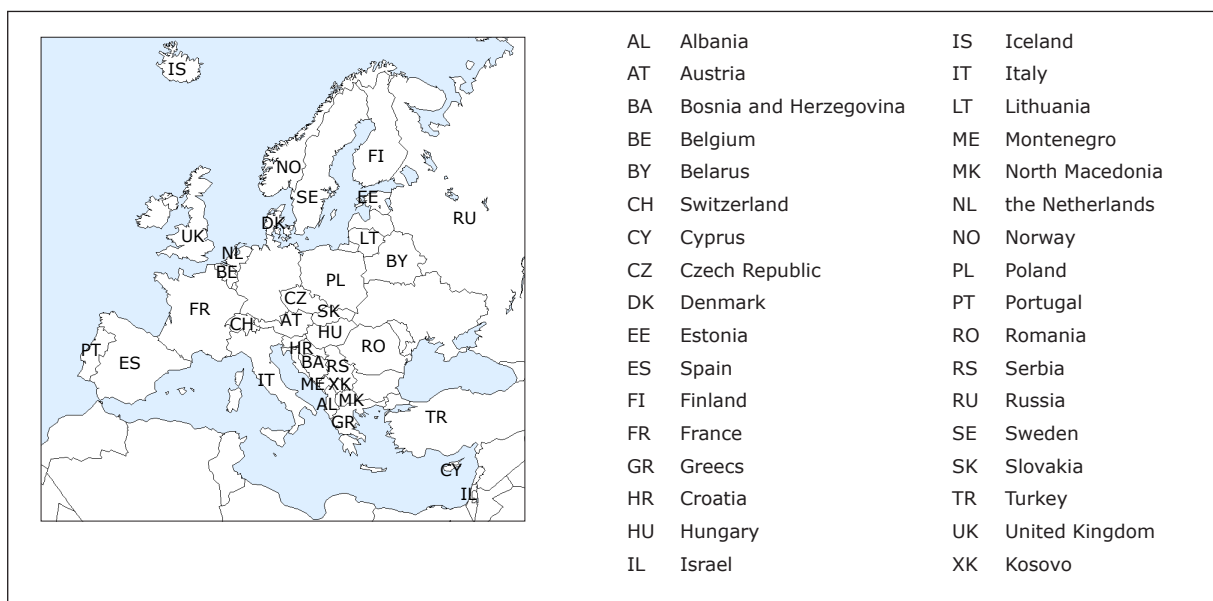

Detailed information on the contents of this figure can be found in table B.2.2 for registries providing individual patient data, and in table C.2.2 for registries providing aggregated data.

Figure A.1.2  
**Incidence per million population by country / region, unadjusted and adjusted**  
*at day 1*

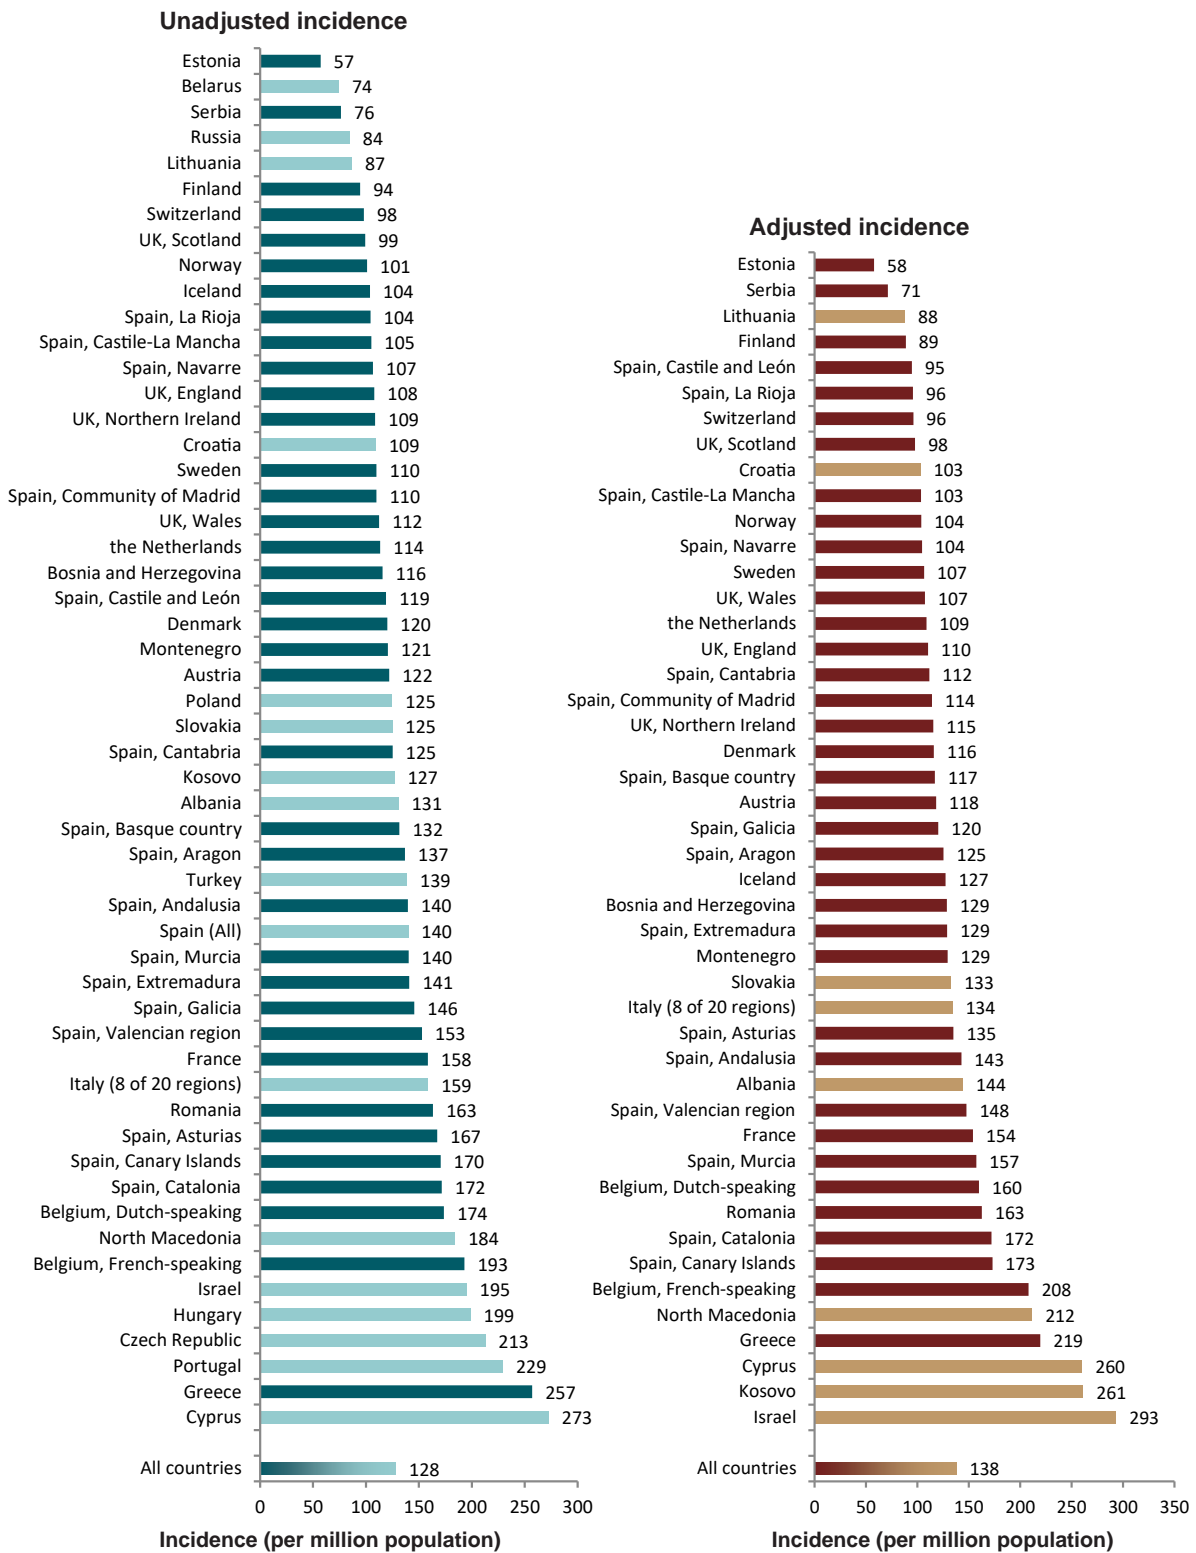

Registries providing individual patient data are shown as dark bars, and registries providing aggregated data as light bars.

Detailed information on the contents of this figure can be found in tables B.2.2 and B.2.4 for registries providing individual patient data, and in tables C.2.2 and C.2.4 for registries providing aggregated data.

Adjustment of the incidence was performed by standardising the incidence to the age and sex distribution of the EU28 population.

Figure A.1.3  
**Age, sex, and primary renal disease distribution by type of data provided, unadjusted at day 1**

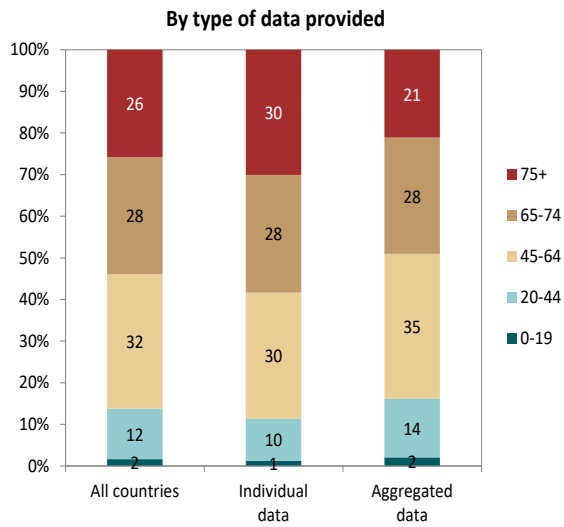

This figure summarizes the data presented in tables B.2.1 and C.2.1.

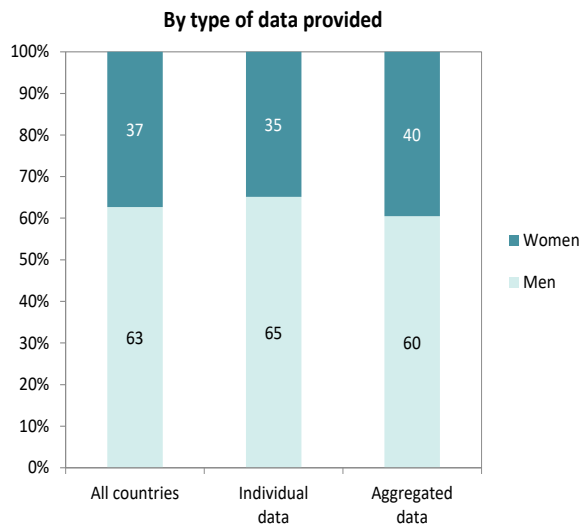

This figure summarizes the data presented in tables B.2.3 and C.2.3.

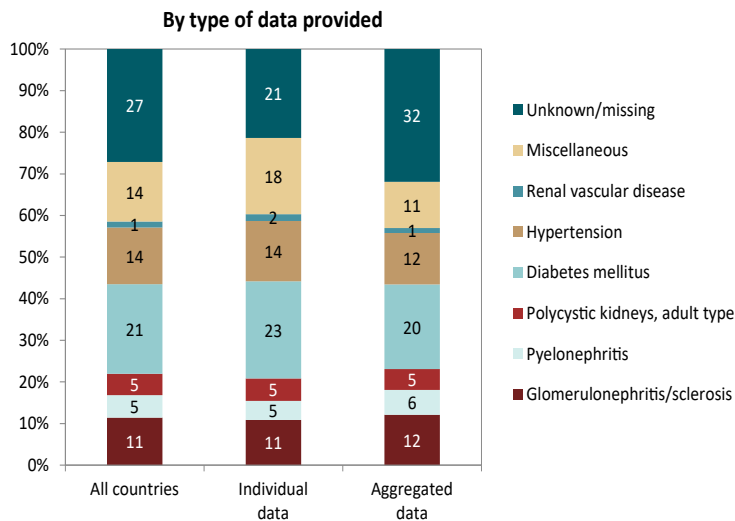

This figure summarizes the data presented in tables B.2.5 and C.2.5.

Figure A.1.4  
**Treatment modality distribution by age, sex and primary renal disease, unadjusted**  
*at day 1*

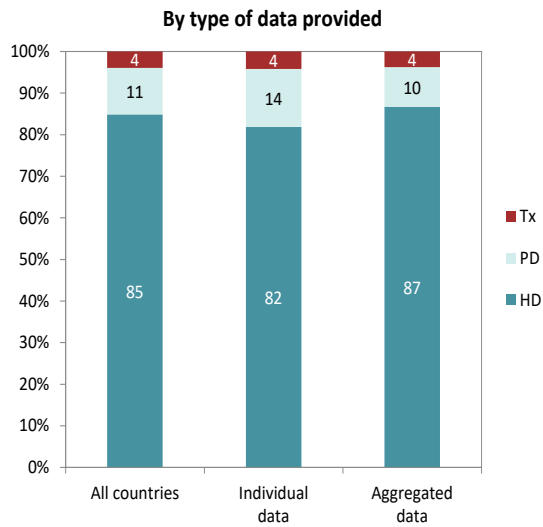

This figure summarizes the data presented in tables B.2.10 and C.2.8.

The figures below are only based on data from registries providing individual patient data.

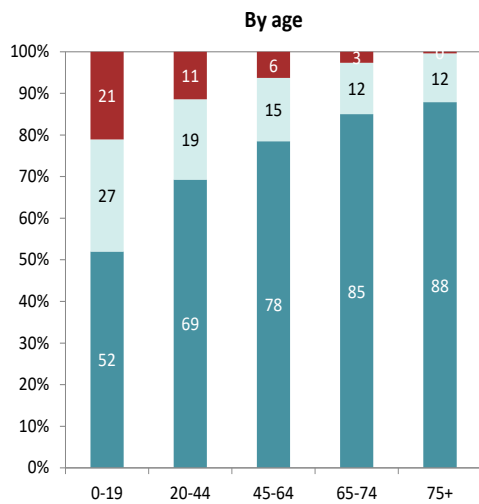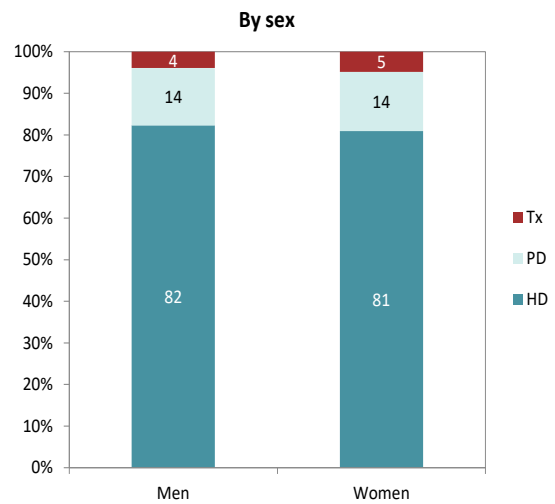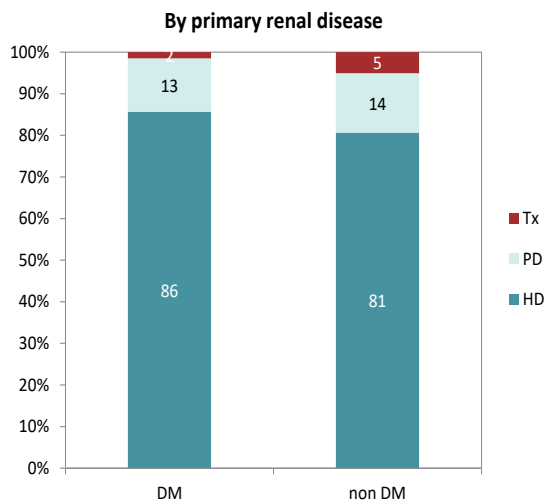

These figures summarize the data presented in table B.2.11.

Abbreviations used: HD: haemodialysis; PD: peritoneal dialysis; Tx: transplant; DM: diabetes mellitus

Figure A.2.1  
**Treatment modality distribution by age, sex and primary renal disease, unadjusted**  
*at day 91*

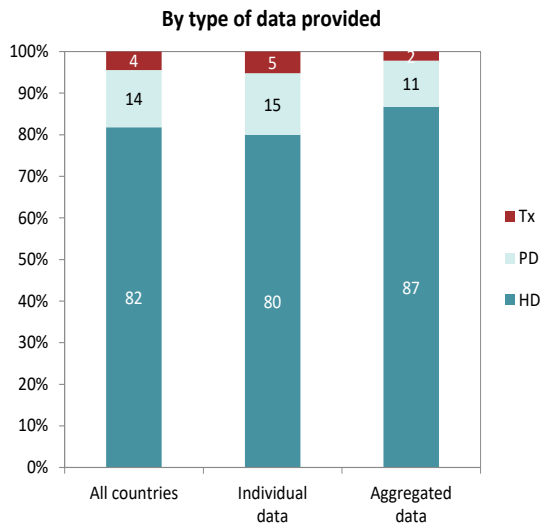

This figure summarizes the data presented in tables B.3.10 and C.3.8.

The figures below are only based on data from registries providing individual patient data.

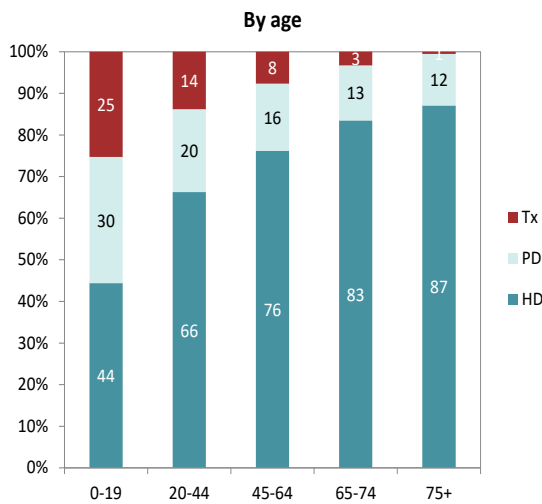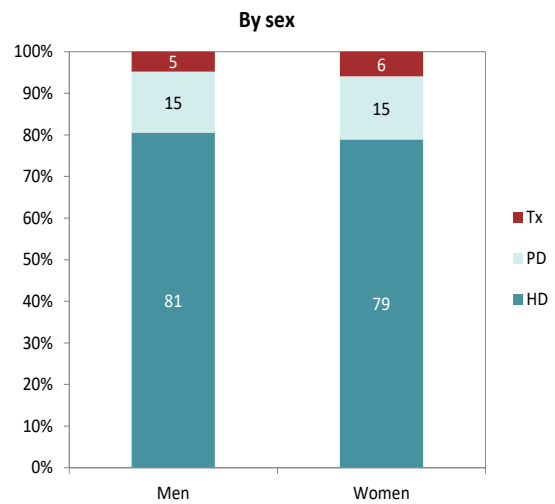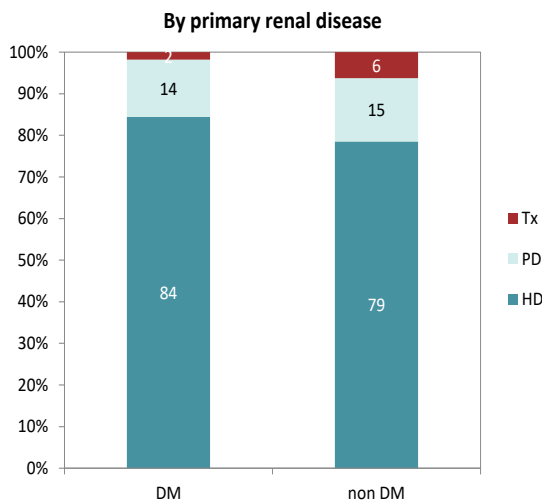

These figures summarize the data presented in table B.3.11.

Abbreviations used: HD: haemodialysis; PD: peritoneal dialysis; Tx: transplant; DM: diabetes mellitus

Table A.3.1  
Summary data on the prevalence of KRT on 31 December 2020, unadjusted

|                                  | General population covered by the registry in thousands | Prevalent patients on KRT in 2020 |         |          |            |       |        |
|----------------------------------|---------------------------------------------------------|-----------------------------------|---------|----------|------------|-------|--------|
|                                  |                                                         | All N                             | All Pmp | Mean Age | Median Age | DM N  | DM Pmp |
| Albania                          | 2818                                                    | 1664                              | 591     | 52.2     | 51.0       | 356   | 126    |
| Austria §                        | 8901                                                    | 9181                              | 1031    | 62.4     | 63.8       | 1728  | 194    |
| Belarus //                       | 9380                                                    | 3881                              | 414     |          |            | 514   | 55     |
| Belgium, Dutch-speaking *        | 6654                                                    | 8571                              | 1288    | 66.5     | 68.4       | 1389  | 209    |
| Belgium, French-speaking *       | 4890                                                    | 6663                              | 1363    | 65.5     | 67.0       | 1186  | 243    |
| Bosnia and Herzegovina           | 3531                                                    | 2547                              | 721     | 59.9     | 61.4       | 478   | 135    |
| Croatia &                        | 3441                                                    | 2028                              | 589     | 66.4     | 69.0       | 510   | 148    |
| Cyprus                           | 888                                                     |                                   |         |          |            |       |        |
| Czech Republic                   | 10488                                                   | 11287                             | 1076    |          |            |       |        |
| Denmark                          | 5888                                                    | 5685                              | 966     | 59.3     | 60.8       | 962   | 163    |
| Estonia                          | 1330                                                    | 1049                              | 789     | 59.0     | 60.0       | 200   | 150    |
| Finland                          | 5530                                                    | 5303                              | 959     | 60.1     | 62.5       | 1323  | 239    |
| France                           | 67488                                                   | 92864                             | 1376    | 63.4     | 65.6       | 15361 | 228    |
| Greece                           | 10699                                                   | 15169                             | 1418    | 65.9     | 68.0       | 2815  | 263    |
| Hungary                          | 9672                                                    | 9651                              | 998     |          |            |       |        |
| Iceland                          | 366                                                     | 302                               | 824     | 58.5     | 59.7       | 33    | 90     |
| Israel &                         | 9215                                                    | 6916                              | 751     | 67.4     | 69.3       | 3254  | 353    |
| Italy (8 of 20 regions)          | 21471                                                   | 28127                             | 1310    | 63.1     | 65.0       | 2930  | 136    |
| Kosovo                           | 1688                                                    | 784                               | 465     | 60.2     | 62.0       | 231   | 137    |
| Lithuania                        | 2794                                                    | 2417                              | 865     |          |            |       |        |
| Montenegro *                     | 621                                                     | 241                               | 388     | 58.2     | 61.5       | 35    | 56     |
| North Macedonia                  | 2069                                                    | 1762                              | 852     | 59.8     | 61.0       | 312   | 151    |
| Norway                           | 5379                                                    | 5464                              | 1016    | 60.2     | 62.3       | 757   | 141    |
| Poland &                         | 38354                                                   | 19647                             | 512     |          |            | 5449  | 142    |
| Portugal □                       | 10298                                                   | 20713                             | 2011    | 67.7     |            | 3684  | 358    |
| Romania                          | 18302                                                   | 22074                             | 1206    | 63.4     | 65.3       | 2104  | 115    |
| Russia                           | 143248                                                  | 61164                             | 427     |          |            | 11102 | 78     |
| Serbia                           | 6209                                                    | 5516                              | 888     | 60.7     | 63.0       | 976   | 157    |
| Slovakia &                       | 4324                                                    | 3105                              | 718     | 64.0     | 66.0       | 928   | 215    |
| Spain (All)                      | 47451                                                   | 64621                             | 1362    | 60.4     | 63.7       | 10560 | 223    |
| Spain, Andalusia                 | 8490                                                    | 11053                             | 1302    | 61.4     | 62.7       | 1848  | 218    |
| Spain, Aragon                    | 1331                                                    | 1872                              | 1407    | 65.0     | 66.7       | 328   | 246    |
| Spain, Asturias                  | 1016                                                    | 1477                              | 1454    | 64.6     | 66.2       | 272   | 268    |
| Spain, Basque country            | 2188                                                    | 2783                              | 1272    | 62.4     | 64.5       | 356   | 163    |
| Spain, Canary Islands            | 2241                                                    | 3409                              | 1521    | 62.5     | 63.6       | 921   | 411    |
| Spain, Cantabria *               | 583                                                     | 680                               | 1166    | 63.7     | 65.3       | 111   | 190    |
| Spain, Castile and León *        | 2395                                                    | 3187                              | 1331    | 66.0     | 67.0       | 547   | 228    |
| Spain, Castile-La Mancha *       | 2047                                                    | 2462                              | 1203    | 63.7     | 64.3       | 424   | 207    |
| Spain, Catalonia                 | 7780                                                    | 11593                             | 1490    | 63.5     | 65.3       | 1628  | 209    |
| Spain, Community of Madrid       | 6780                                                    | 7753                              | 1144    | 62.2     | 63.7       | 1338  | 197    |
| Spain, Extremadura               | 1064                                                    | 1384                              | 1301    | 63.1     | 63.7       | 226   | 212    |
| Spain, Galicia                   | 2700                                                    | 3951                              | 1463    | 63.7     | 64.8       | 669   | 248    |
| Spain, La Rioja                  | 316                                                     | 383                               | 1212    | 62.7     | 63.7       | 48    | 152    |
| Spain, Murcia                    | 1511                                                    | 2165                              | 1433    | 63.0     | 63.8       | 334   | 221    |
| Spain, Navarre *                 | 657                                                     | 904                               | 1376    | 63.7     | 65.7       | 149   | 227    |
| Spain, Valencian region          | 5057                                                    | 7470                              | 1477    | 64.1     | 66.0       | 1127  | 223    |
| Sweden                           | 10353                                                   | 10332                             | 998     | 60.3     | 62.5       | 1784  | 172    |
| Switzerland                      | 8638                                                    | 8528                              | 987     | 62.8     | 64.7       | 1269  | 147    |
| the Netherlands                  | 16744                                                   | 17931                             | 1071    | 61.2     | 63.2       | 2393  | 143    |
| Turkey ‡                         | 83614                                                   | 83350                             | 997     |          |            | 2638  | 347    |
| United Kingdom, England          | 56550                                                   | 54971                             | 972     | 58.3     | 59.5       | 9908  | 175    |
| United Kingdom, Northern Ireland | 1896                                                    | 2032                              | 1072    | 58.3     | 59.2       | 298   | 157    |
| United Kingdom, Scotland         | 5466                                                    | 5421                              | 992     | 57.3     | 59.0       | 940   | 172    |
| United Kingdom, Wales            | 3170                                                    | 3300                              | 1041    | 58.6     | 59.9       | 599   | 189    |
| All countries                    | 649818                                                  | 604261                            | 931     | 60.7     | 59.3       | 89006 | 159    |

DM = diabetes mellitus as primary renal disease

When cells are left empty, the data are unavailable and could not be used for the calculation of the summary data

§ The prevalence is underestimated by approximately 1% due to one hemodialysis centre not submitting data

// Patients younger than 18 years of age are not reported

\* Patients younger than 20 years of age are not reported. The true prevalent counts are therefore slightly higher than the counts reported here

& Data on prevalence include dialysis patients only

□ Data on primary renal disease are available for dialysis patients only (64.4% of total N=20713)

‡ Data on the prevalence of primary renal disease (DM) is based on 7585 dialysis patients (9.1% of total)

Figure A.3.1  
**Prevalence per million population by country / region, unadjusted**  
*prevalent patients on December 31*

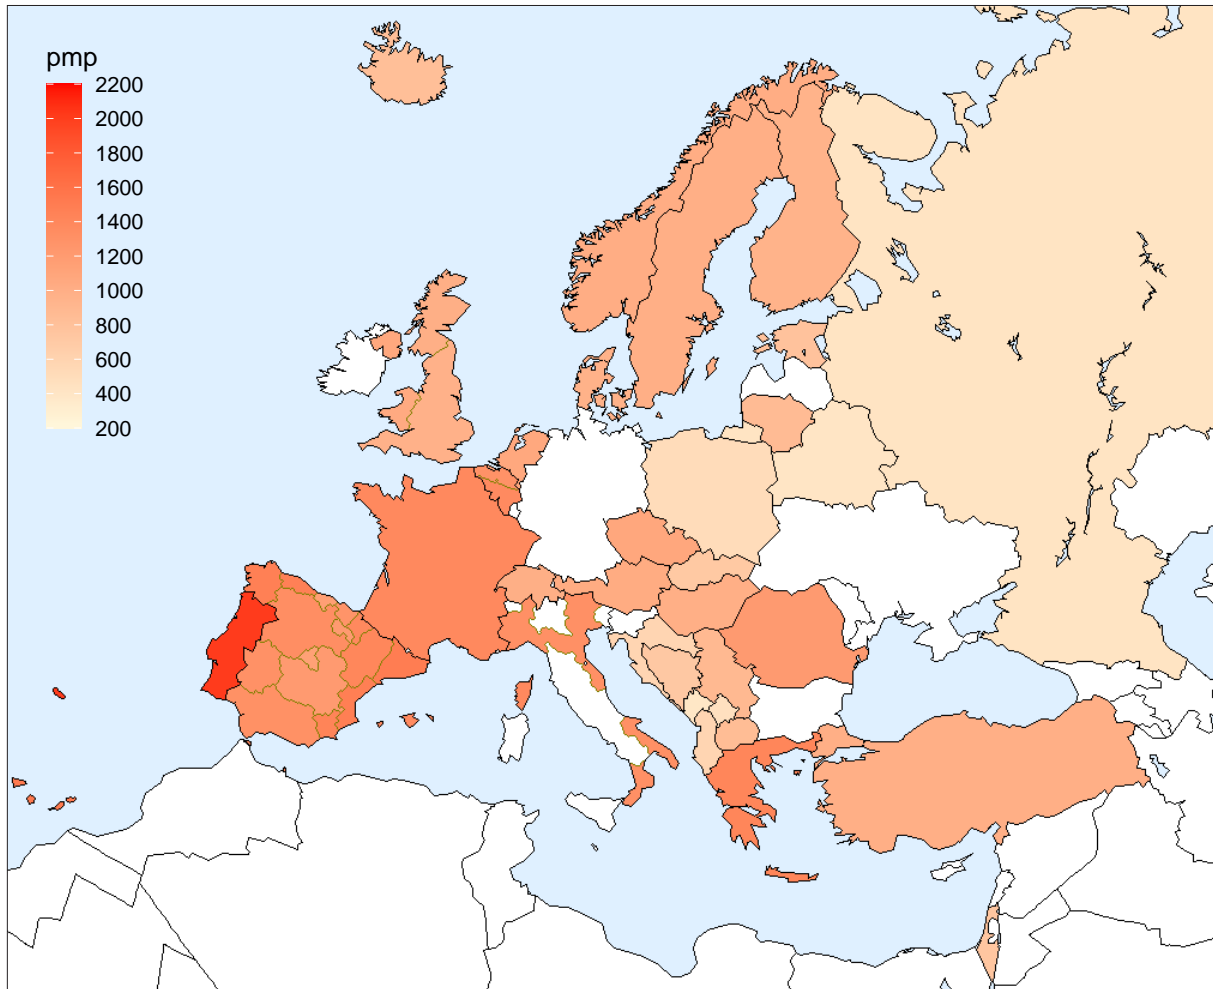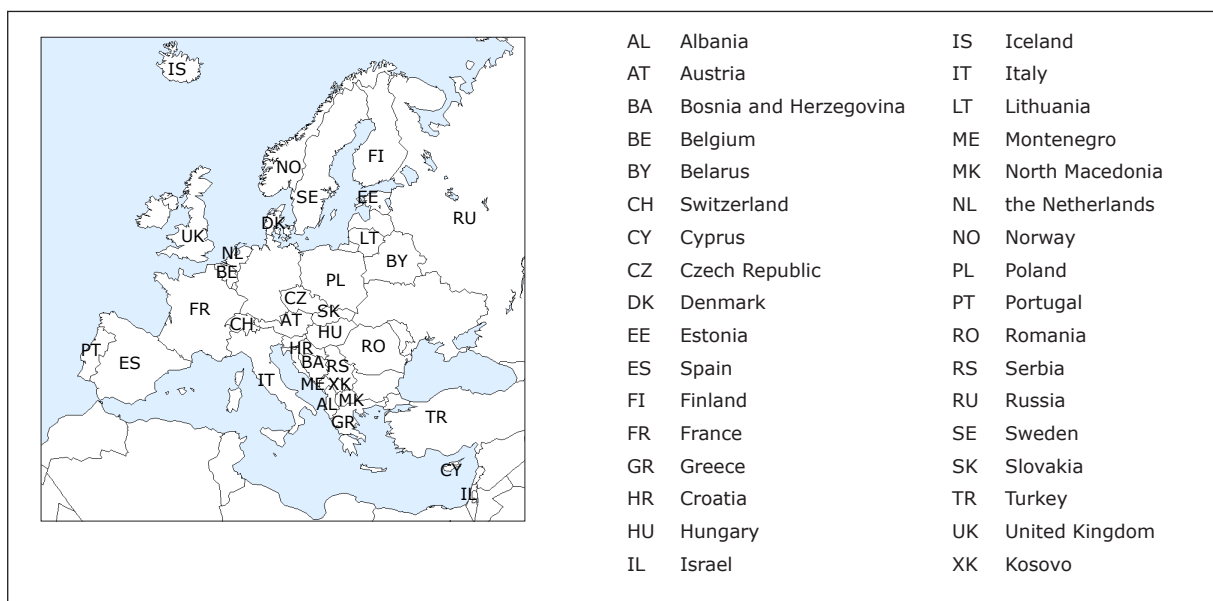

Detailed information on the contents of this figure can be found in table B.4.2 for registries providing individual patient data, and in table C.4.2 for registries providing aggregated data.



Figure A.3.2  
**Prevalence per million population by country / region, unadjusted and adjusted**  
*prevalent patients on December 31*

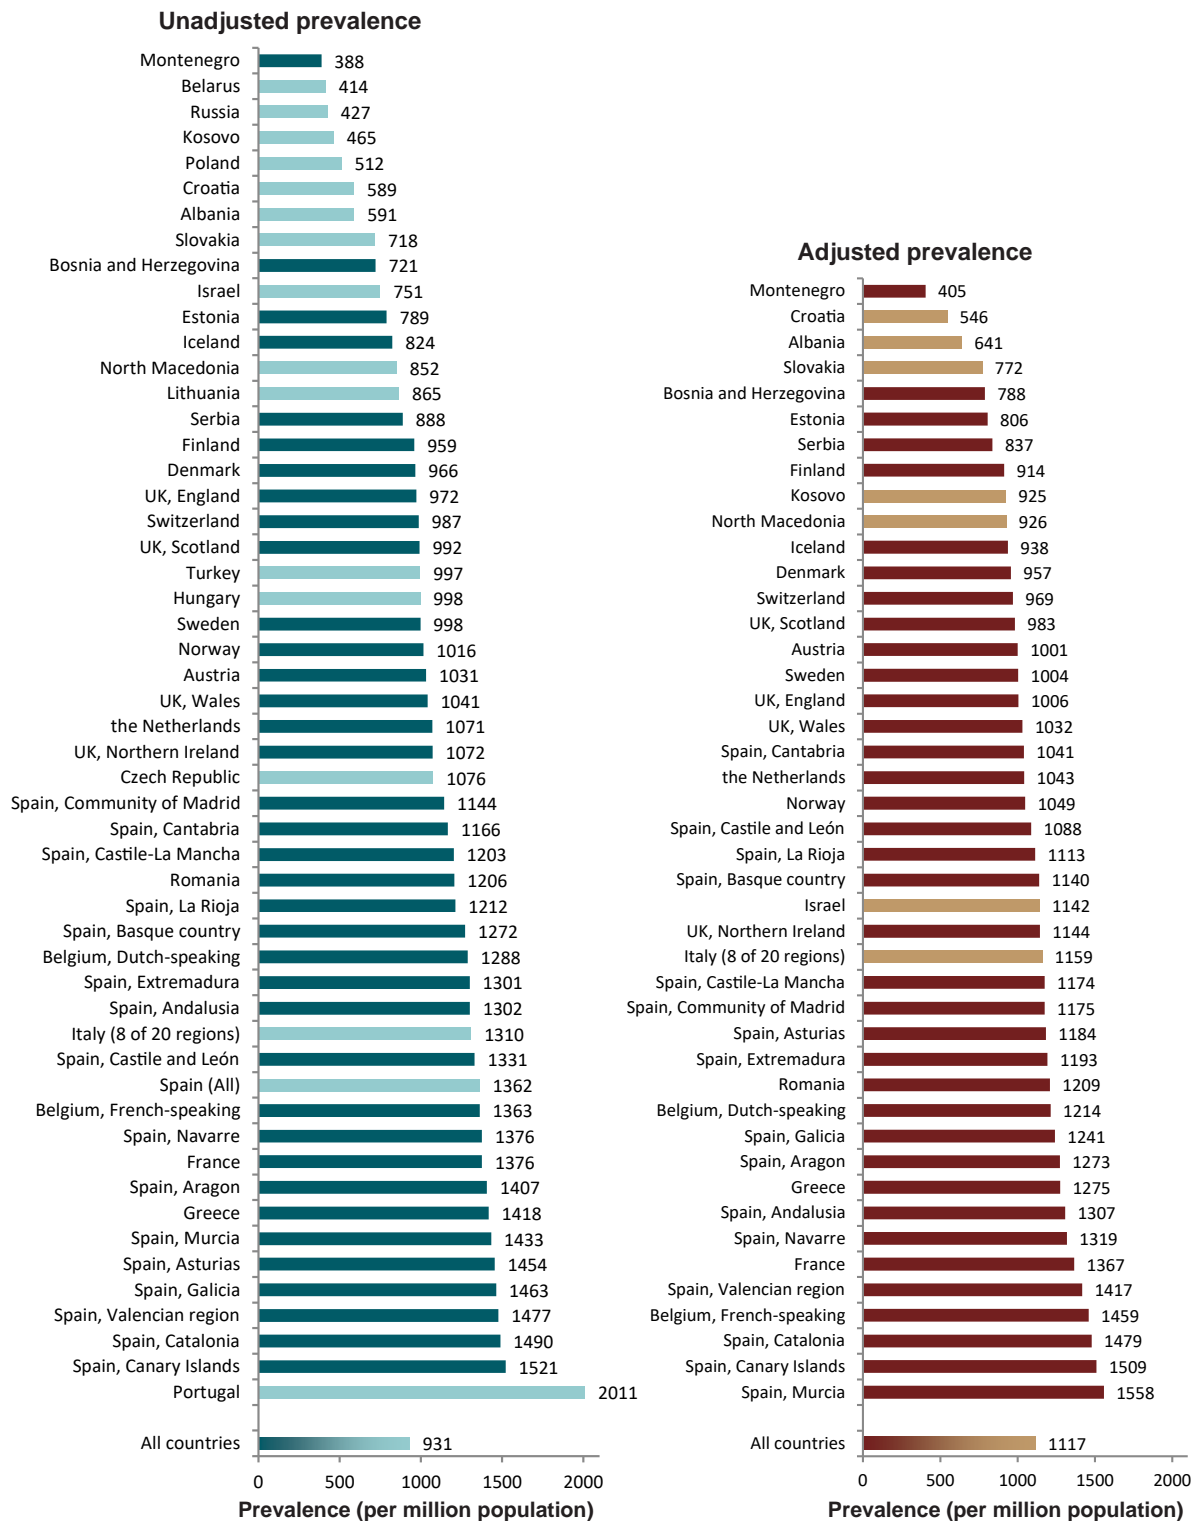

Registries providing individual patient data are shown as dark bars, and registries providing aggregated data as light bars.

Detailed information on the contents of this figure can be found in tables B.4.2 and B.4.4 for registries providing individual patient data, and in tables C.4.2 and C.4.4 for registries providing aggregated data. Adjustment of the prevalence was performed by standardising the prevalence to the age and sex distribution of the EU28 population.

Figure A.3.3  
**Age, sex, and primary renal disease distribution by type of data provided, unadjusted**  
*prevalent patients on December 31*

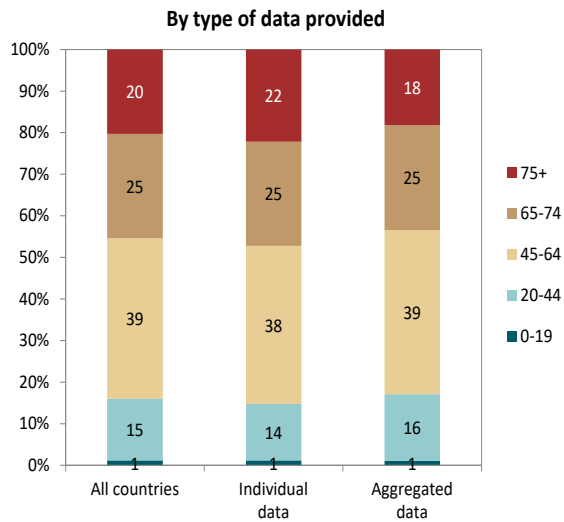

This figure summarizes the data presented in tables B.4.1 and C.4.1.

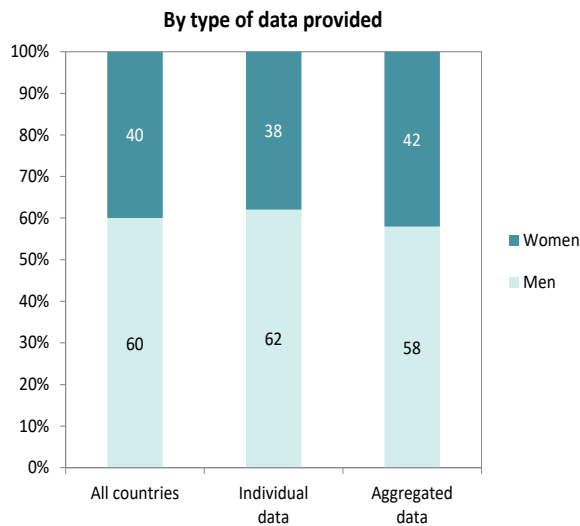

This figure summarizes the data presented in tables B.4.3 and C.4.3.

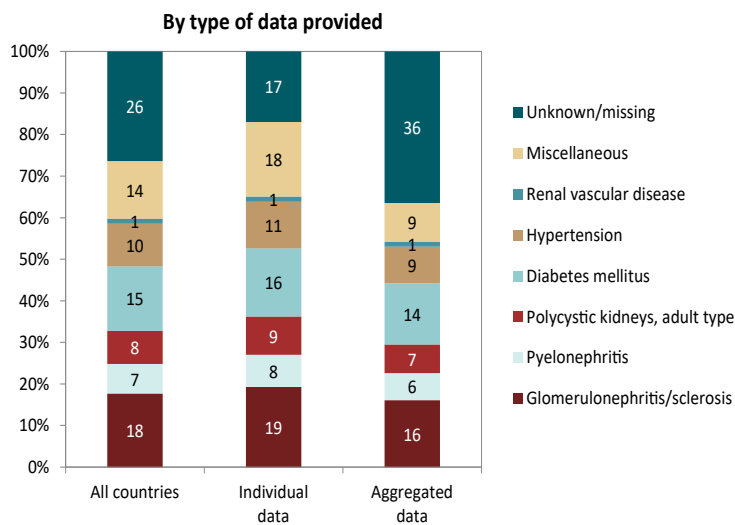

This figure summarizes the data presented in tables B.4.5 and C.4.5.

Figure A.3.4  
**Treatment modality distribution by age, sex and primary renal disease, unadjusted**  
*prevalent patients on December 31*

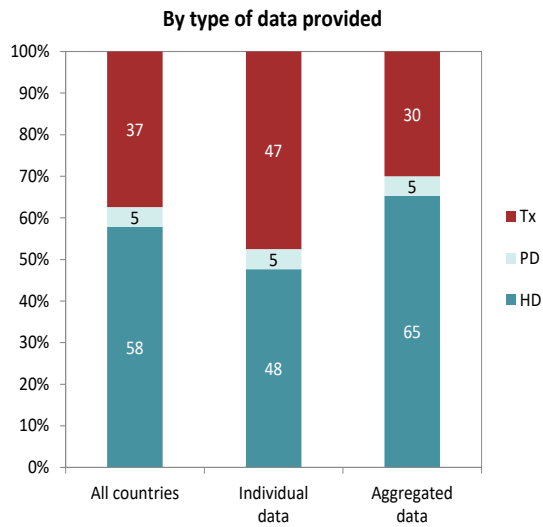

This figure summarizes the data presented in tables B.4.10 and C.4.8.

The figures below are only based on data from registries providing individual patient data.

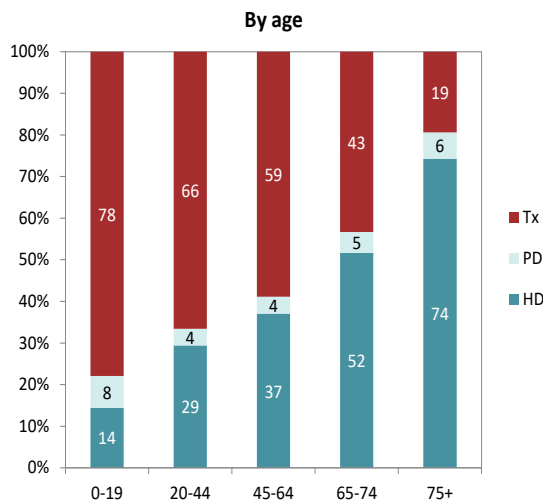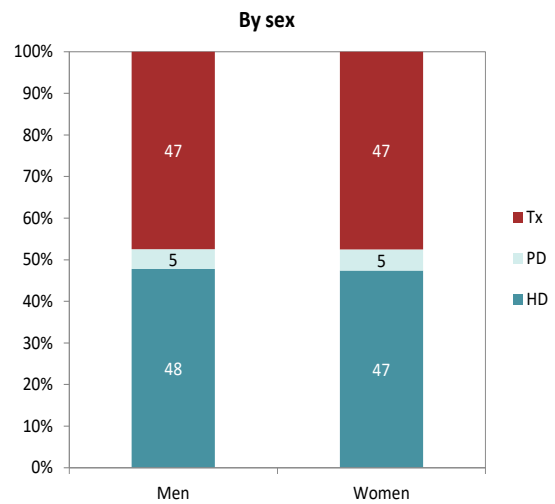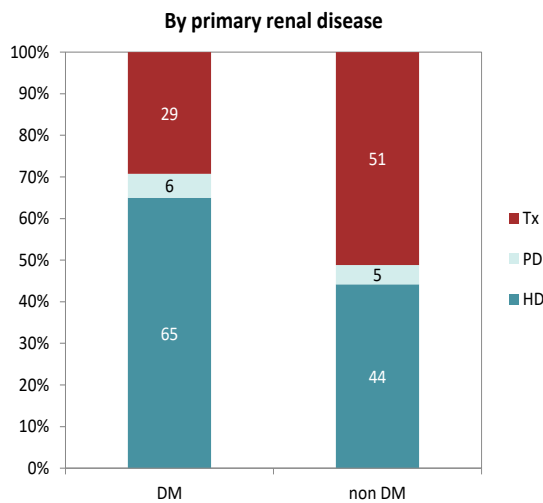

These figures summarize the data presented in table B.4.11.

Abbreviations used: HD: haemodialysis; PD: peritoneal dialysis; Tx: transplant; DM: diabetes mellitus

Figure A.4.1  
Kidney transplant counts and per million population by country / region, unadjusted

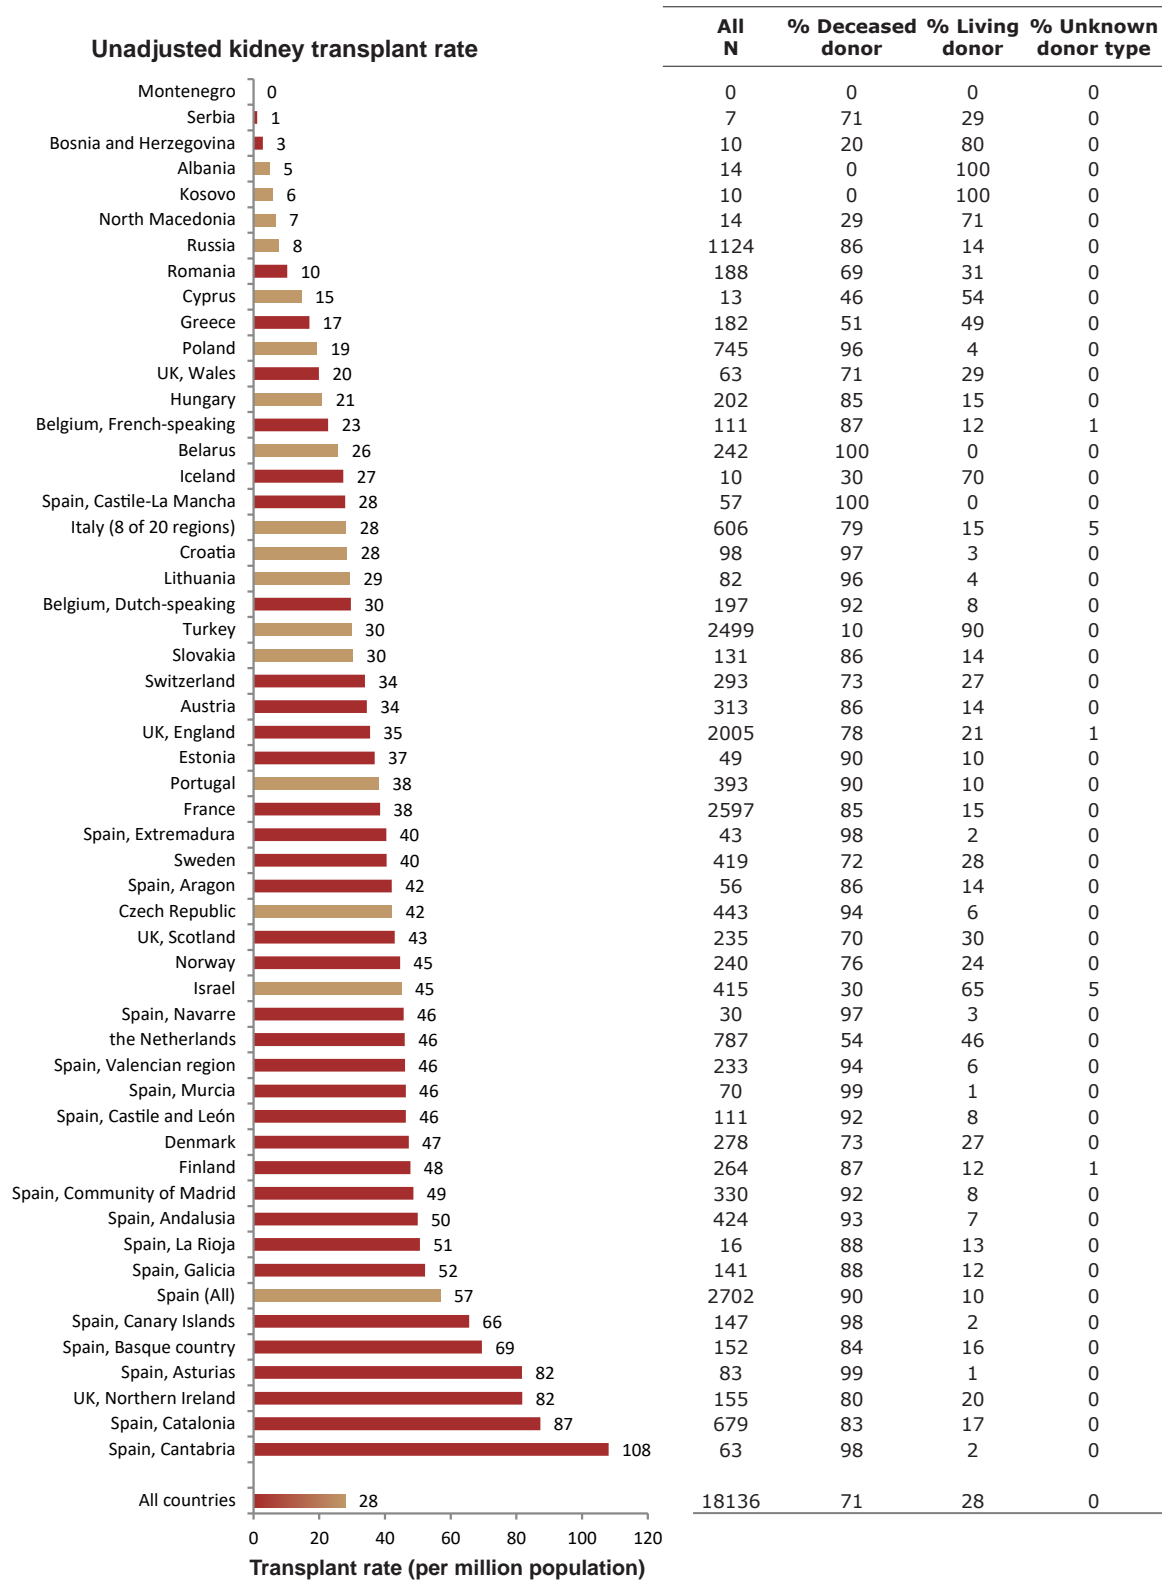

Registries providing individual patient data are shown as red bars, and registries providing aggregated data as orange bars.

Detailed information on the contents of this figure can be found in tables B.5.1 and B.5.2 for registries providing individual patient data, and in tables C.5.1 and C.5.2 for registries providing aggregated data.

Figure A.4.2  
Kidney transplants per million population by donor type and by country / region, unadjusted

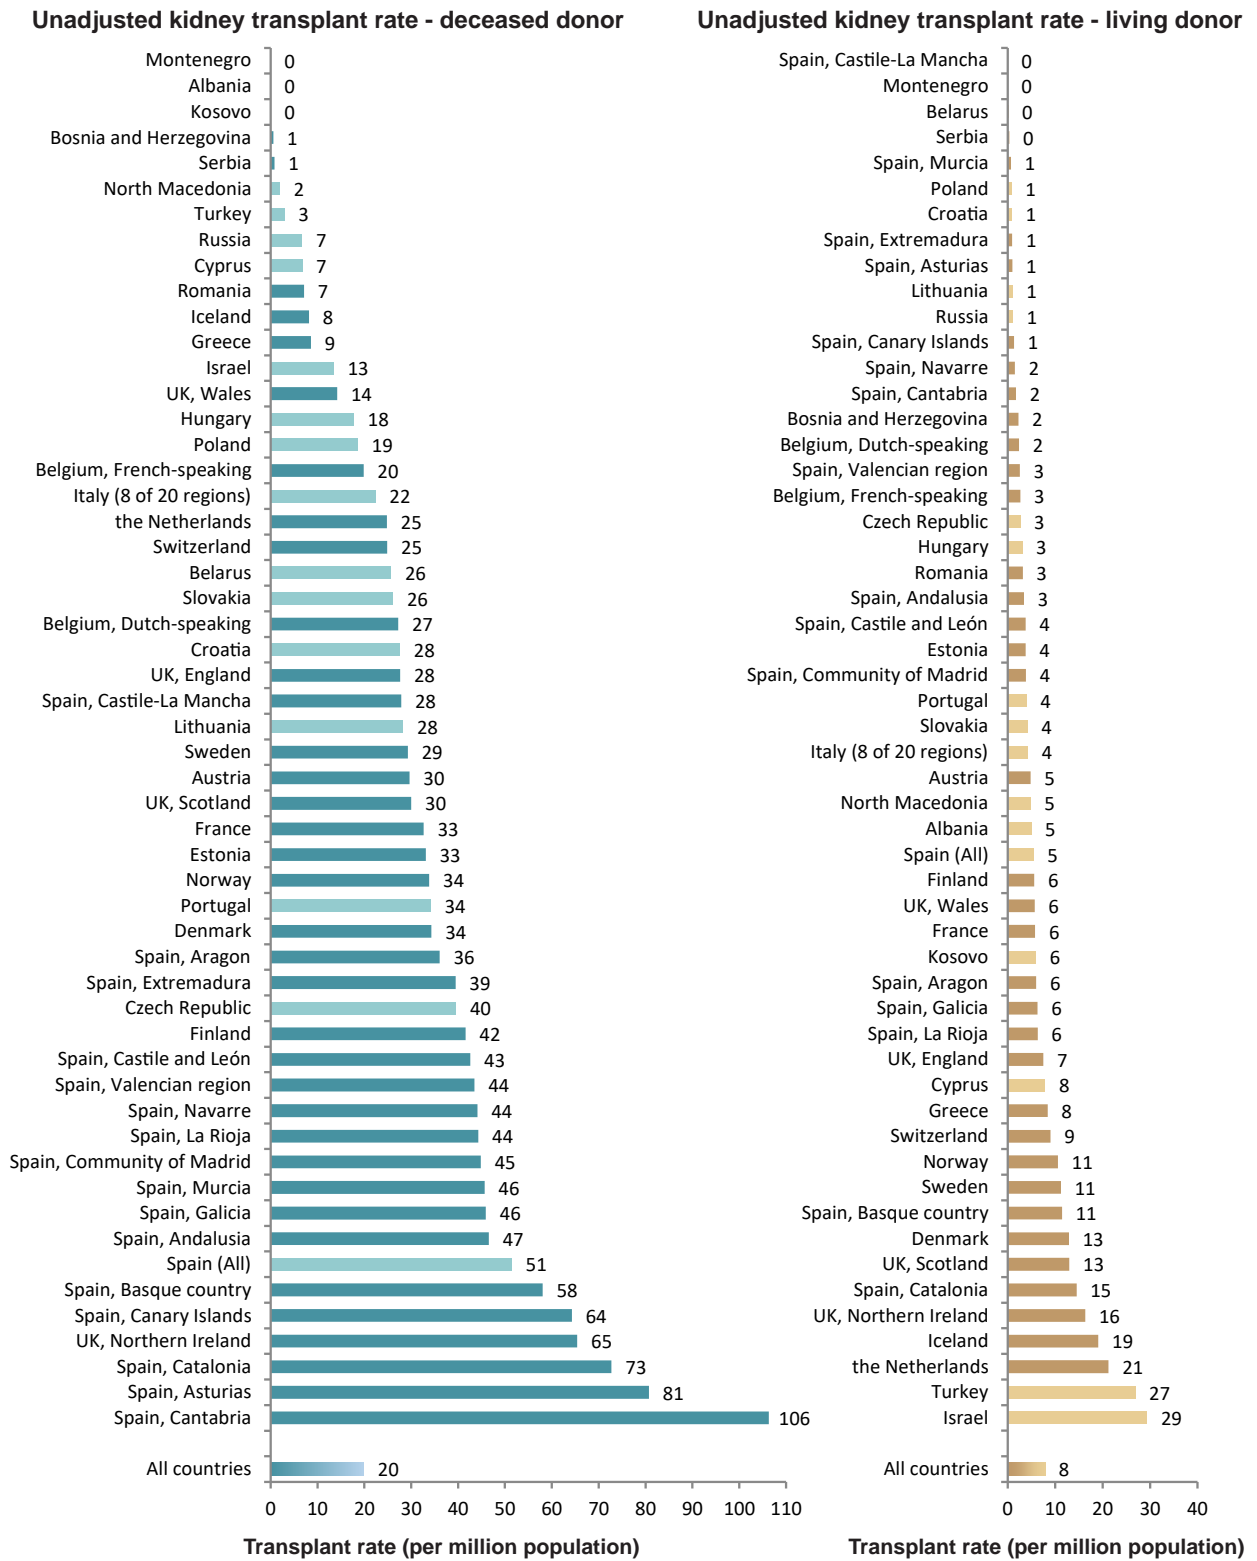

Registries providing individual patient data are shown as dark bars, and registries providing aggregated data as light bars.

Detailed information on the contents of this figure can be found in table B.5.2 for registries providing individual patient data, and in table C.5.2 for registries providing aggregated data.

Figure A.4.3  
**Donor type distribution by type of data provided, unadjusted**

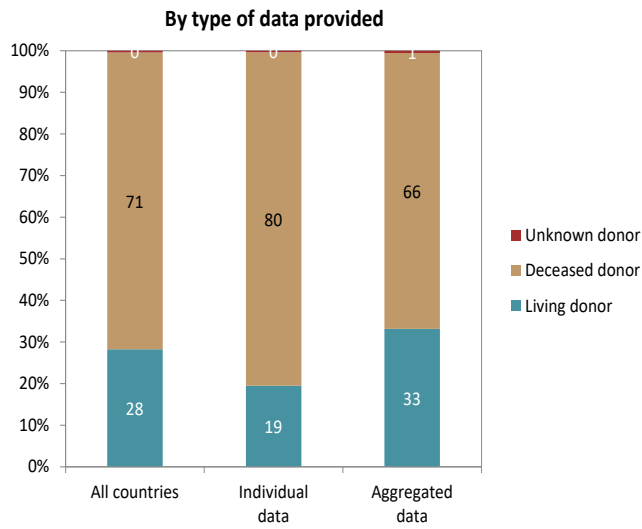

This figure summarizes the data presented in table B.5.1 for registries providing individual patient data, and in table C.5.1 for registries providing aggregated data.

Table A.5.1

**One-, two- and five-year survival probabilities by treatment modality and cohort***from day 1 of KRT / dialysis, or from day of transplant*

|                                                                             | Survival probabilities as % (95% CI) |                  |                  |                    |                  |
|-----------------------------------------------------------------------------|--------------------------------------|------------------|------------------|--------------------|------------------|
|                                                                             | cohort 2011 - 2015                   |                  |                  | cohort 2014 - 2018 |                  |
|                                                                             | 1 year                               | 2 year           | 5 year           | 1 year             | 2 year           |
| <b>Patient survival on KRT</b>                                              |                                      |                  |                  |                    |                  |
| Unadjusted                                                                  | 84.8 (84.6-85.0)                     | 74.8 (74.6-75.1) | 51.8 (51.6-52.0) | 85.5 (85.4-85.7)   | 75.6 (75.4-75.8) |
| Adjusted †                                                                  | 87.6 (87.4-87.7)                     | 78.5 (78.3-78.7) | 53.9 (53.6-54.2) | 88.1 (88.0-88.3)   | 79.0 (78.8-79.2) |
| <b>Patient survival on dialysis</b>                                         |                                      |                  |                  |                    |                  |
| Unadjusted                                                                  | 83.7 (83.5-83.9)                     | 72.2 (72.0-72.5) | 41.8 (41.5-42.1) | 84.5 (84.3-84.6)   | 72.9 (72.7-73.1) |
| Adjusted †                                                                  | 85.9 (85.8-86.1)                     | 75.6 (75.4-75.8) | 46.8 (46.5-47.1) | 86.8 (86.7-87.0)   | 76.6 (76.4-76.8) |
| <b>Patient survival after first kidney transplantation (deceased donor)</b> |                                      |                  |                  |                    |                  |
| Unadjusted                                                                  | 96.2 (96.0-96.4)                     | 94.1 (93.8-94.3) | 86.2 (85.8-86.5) | 96.3 (96.2-96.5)   | 94.1 (93.9-94.3) |
| Adjusted ††                                                                 | 98.0 (97.9-98.1)                     | 96.8 (96.7-97.0) | 92.1 (91.9-92.4) | 98.1 (97.9-98.2)   | 96.8 (96.7-97.0) |
| <b>Graft survival after first kidney transplantation (deceased donor)</b>   |                                      |                  |                  |                    |                  |
| Unadjusted                                                                  | 91.0 (90.7-91.3)                     | 87.9 (87.5-88.2) | 77.3 (76.9-77.7) | 91.3 (91.0-91.6)   | 88.0 (87.7-88.4) |
| Adjusted ††                                                                 | 92.9 (92.6-93.1)                     | 90.3 (90.0-90.6) | 81.3 (80.9-81.8) | 93.1 (92.8-93.3)   | 90.4 (90.1-90.7) |
| <b>Patient survival after first kidney transplantation (living donor)</b>   |                                      |                  |                  |                    |                  |
| Unadjusted                                                                  | 99.0 (98.8-99.1)                     | 98.1 (97.8-98.3) | 94.4 (94.0-94.8) | 98.9 (98.7-99.0)   | 98.0 (97.8-98.3) |
| Adjusted ††                                                                 | 99.1 (98.9-99.3)                     | 98.3 (98.1-98.5) | 95.0 (94.6-95.4) | 99.1 (98.9-99.2)   | 98.4 (98.1-98.6) |
| <b>Graft survival after first kidney transplantation (living donor)</b>     |                                      |                  |                  |                    |                  |
| Unadjusted                                                                  | 96.6 (96.3-97.0)                     | 94.9 (94.5-95.3) | 88.1 (87.5-88.7) | 96.7 (96.3-97.0)   | 95.2 (94.8-95.5) |
| Adjusted ††                                                                 | 96.4 (96.0-96.7)                     | 94.5 (94.1-95.0) | 87.3 (86.6-87.9) | 96.5 (96.1-96.8)   | 94.9 (94.5-95.3) |

† Analyses were adjusted using fixed values: age (67 years), sex (63% men) and PRD (24% diabetes mellitus, 19% hypertension/renal vascular disease, 11% glomerulonephritis and 46% other causes)

†† Analyses were adjusted using fixed values: age (50 years), sex (63% men) and PRD (14% diabetes mellitus, 10% hypertension/renal vascular disease, 23% glomerulonephritis and 53% other causes)

This table summarizes the survival data presented in the tables B.6.1 to B.6.16, and is based on data from the following registries providing individual patient data: Austria, Belgium (Dutch-speaking), Belgium (French-speaking), Bosnia and Herzegovina, Denmark, Estonia, Finland, France, Greece, Iceland, Norway, Spain (Andalusia), Spain (Aragon), Spain (Asturias), Spain (Basque country), Spain (Cantabria), Spain (Castile and León), Spain (Castile-La Mancha), Spain (Catalonia), Spain (Community of Madrid), Spain (Extremadura), Spain (Galicia), Spain (Murcia), Spain (Valencian Region), Sweden, the Netherlands, United Kingdom (England/Northern Ireland/Wales) and United Kingdom (Scotland).

Figure A.5.1  
**Adjusted patient survival by modality:**  
**Incident dialysis patients**  
*from day 91, adjusted for age, sex, and primary renal disease*

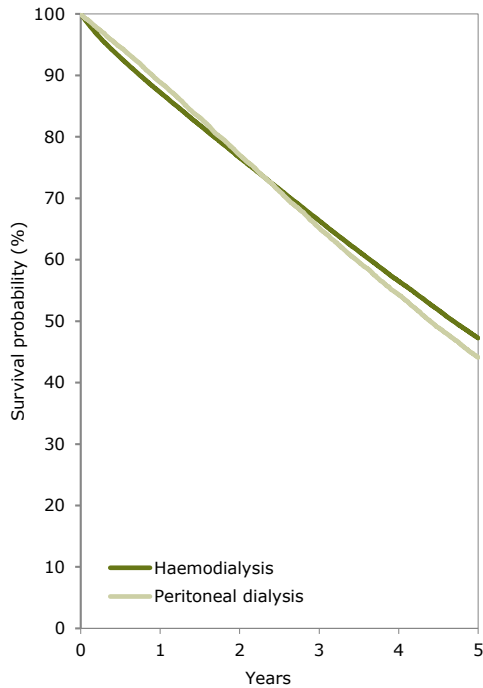

Figure A.5.2  
**Adjusted patient survival by donor type:**  
**Patients receiving a first kidney transplant**  
*from day of transplant, adjusted for age, sex, and primary renal disease*

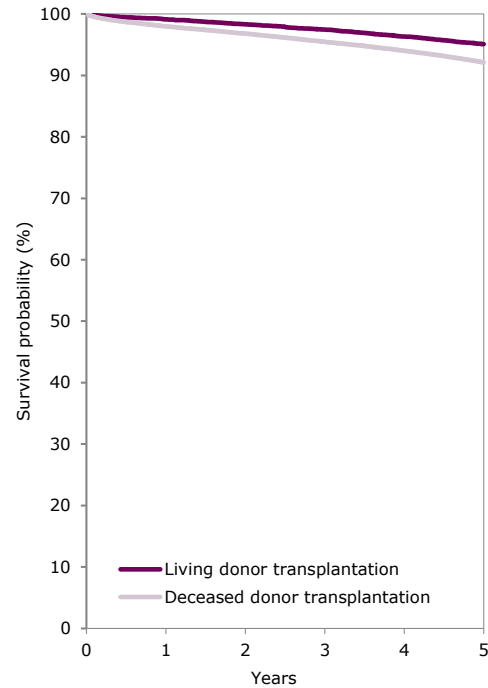

Survival on dialysis was adjusted using fixed values: age (67 years), sex (63% men) and PRD (24% diabetes mellitus, 19% hypertension/renal vascular disease, 11% glomerulonephritis and 46% other causes). Survival after kidney transplantation was adjusted using fixed values: age (50 years), sex (63% men) and PRD (14% diabetes mellitus, 10% hypertension/renal vascular disease, 23% glomerulonephritis and 53% other causes).

These figures are based on patients starting dialysis or receiving a kidney transplant between 2011 and 2015 from the following registries providing individual patient data: Austria, Belgium (Dutch-speaking), Belgium (French-speaking), Bosnia and Herzegovina, Denmark, Estonia, Finland, France, Greece, Iceland, Norway, Spain (Andalusia), Spain (Aragon), Spain (Asturias), Spain (Basque country), Spain (Cantabria), Spain (Castile and León), Spain (Castile-La Mancha), Spain (Catalonia), Spain (Community of Madrid), Spain (Extremadura), Spain (Galicia), Spain (Murcia), Spain (Valencian Region), Sweden, the Netherlands, United Kingdom (England/Northern Ireland/Wales) and United Kingdom (Scotland).



Figure A.6.1  
**Expected remaining lifetimes (years) of the general population (cohort 2016-2020) and of prevalent dialysis and kidney transplant patients (cohort 2016-2020)**  
*by age*

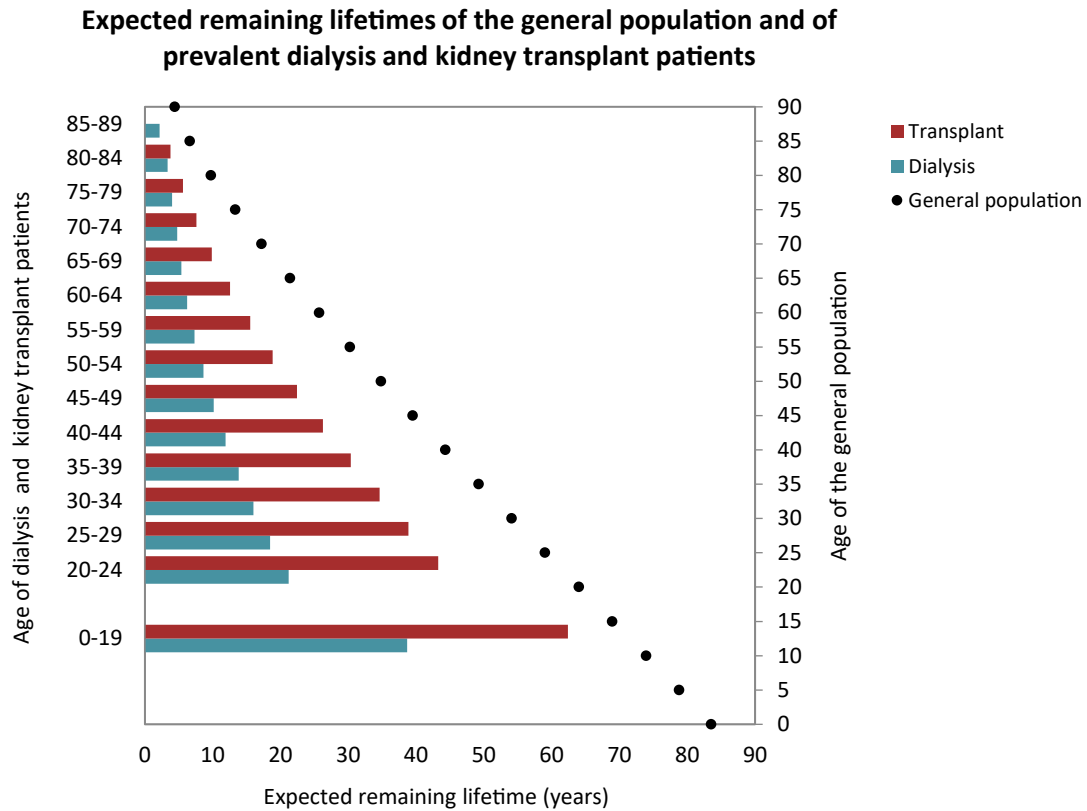

This figure summarizes the data presented in table B.7.1, and is based on data from the following registries providing individual patient data: Austria, Belgium (Dutch-speaking), Belgium (French-speaking), Bosnia and Herzegovina, Denmark, Estonia, Finland, France, Greece, Iceland, Norway, Spain (Andalusia), Spain (Aragon), Spain (Asturias), Spain (Basque country), Spain (Cantabria), Spain (Castille and León), Spain (Castille-La Mancha), Spain (Catalonia), Spain (Community of Madrid), Spain (Extremadura), Spain (Galicia), Spain (Murcia), Spain (Valencian Region), Sweden, the Netherlands, United Kingdom (England/Northern Ireland/Wales) and United Kingdom (Scotland).

Figure A.7.1  
**Incidence per million population by primary renal disease, unadjusted**  
*at day 1*

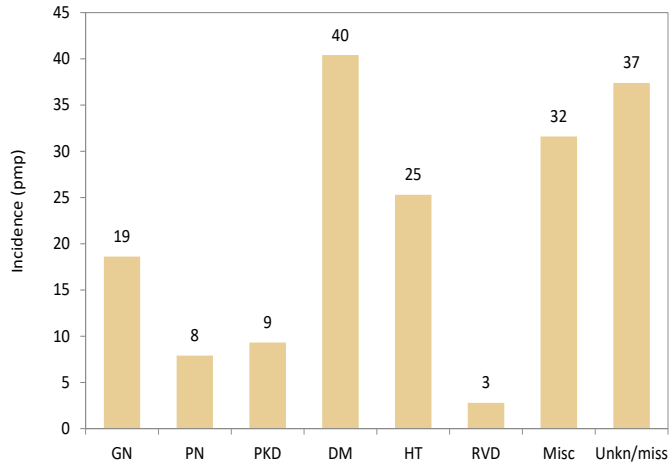

*Abbreviations used: GN: glomerulonephritis/sclerosis; PN: pyelonephritis; PKD: polycystic kidneys, adult type; DM: diabetes mellitus; HT: hypertension; RVD: renal vascular disease; Misc: miscellaneous; Unkn/miss: unknown/missing*

**Figure A.7.2**  
**Age, sex and treatment modality distribution by primary renal disease in incident patients, unadjusted**  
*at day 1*

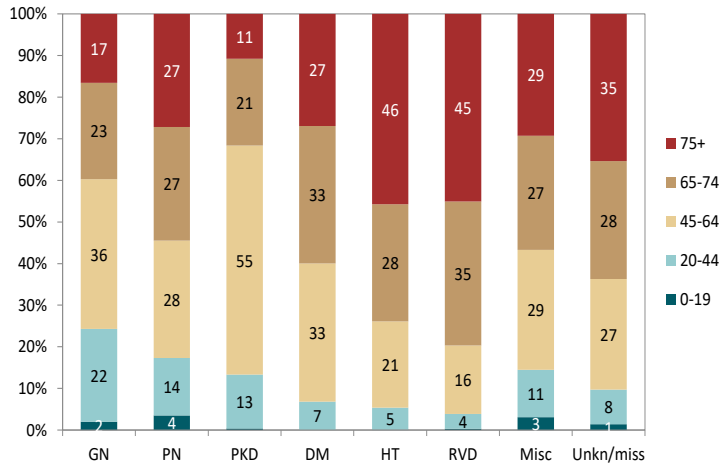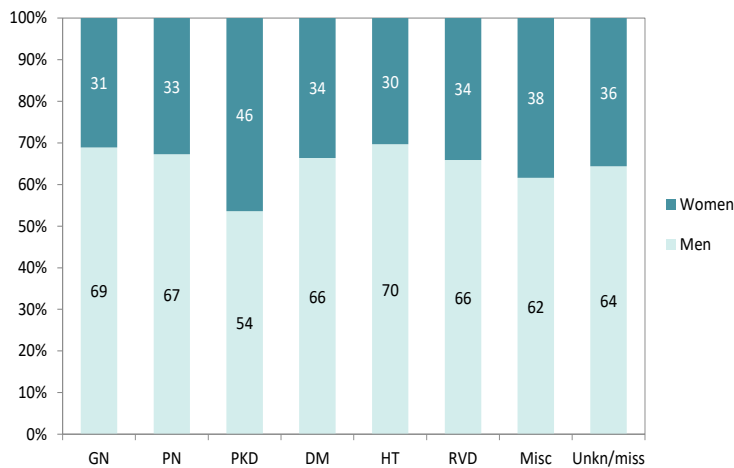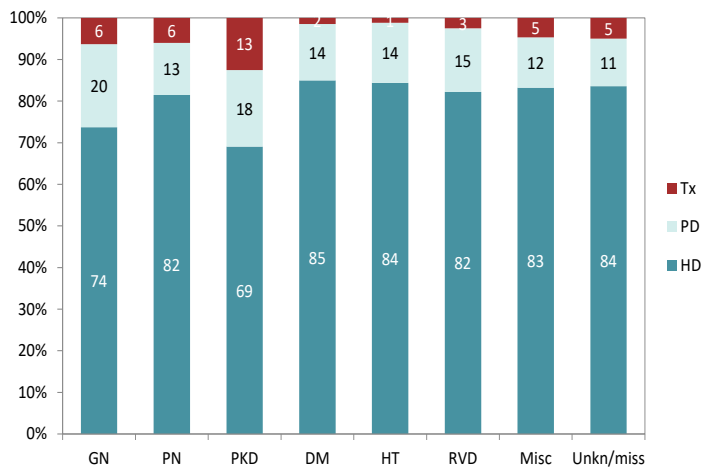

Abbreviations used: GN: glomerulonephritis/sclerosis; PN: pyelonephritis; PKD: polycystic kidneys, adult type; DM: diabetes mellitus; HT: hypertension; RVD: renal vascular disease; Misc: miscellaneous; Unkn/miss: unknown/missing; HD: haemodialysis; PD: peritoneal dialysis; Tx: transplant

Figure A.7.3

**Prevalence per million population by primary renal disease, unadjusted**  
*prevalent patients on December 31*

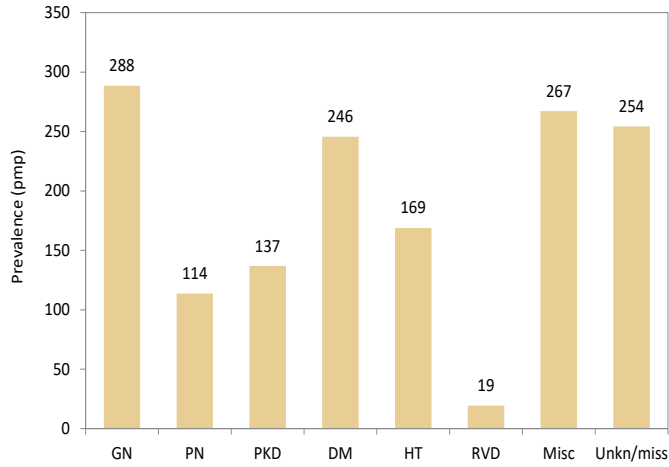

*Abbreviations used: GN: glomerulonephritis/sclerosis; PN: pyelonephritis; PKD: polycystic kidneys, adult type; DM: diabetes mellitus; HT: hypertension; RVD: renal vascular disease; Misc: miscellaneous; Unkn/miss: unknown/missing*

**Figure A.7.4**  
**Age, sex and treatment modality distribution by primary renal disease in prevalent patients, unadjusted**  
*prevalent patients on December 31*

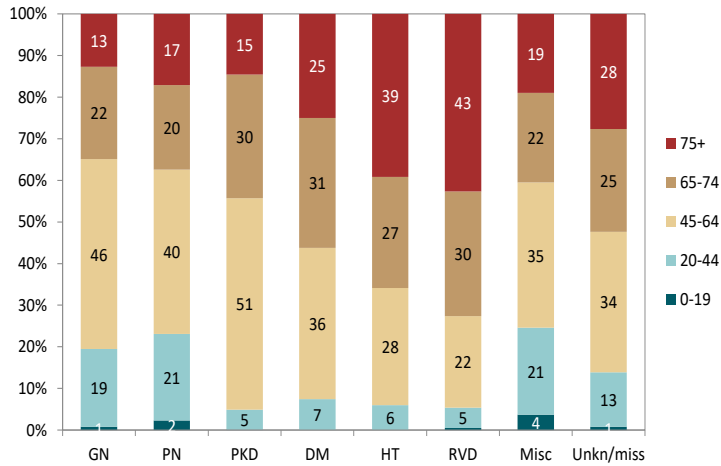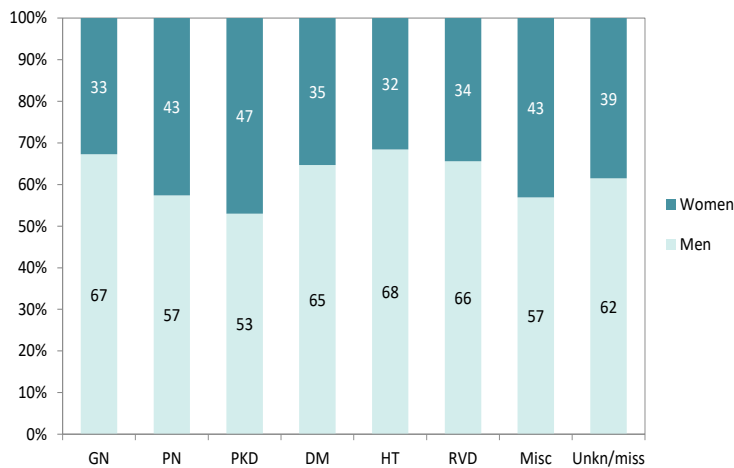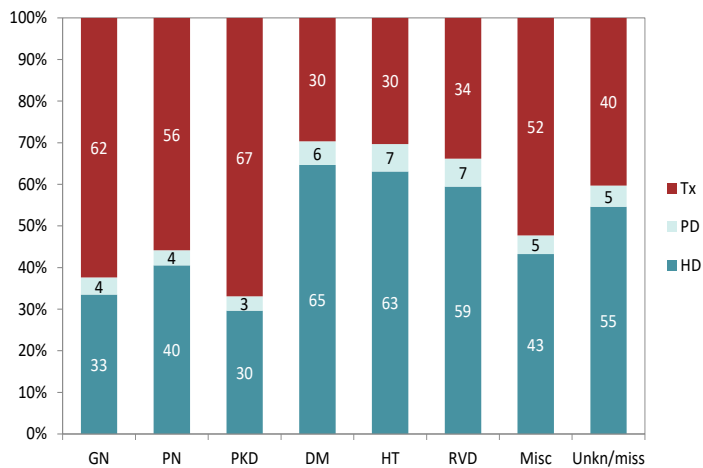

Abbreviations used: GN: glomerulonephritis/sclerosis; PN: pyelonephritis; PKD: polycystic kidneys, adult type; DM: diabetes mellitus; HT: hypertension; RVD: renal vascular disease; Misc: miscellaneous; Unkn/miss: unknown/missing; HD: haemodialysis; PD: peritoneal dialysis; Tx: transplant

**Figure A.7.5**  
**Kidney transplants per million population by primary renal disease, unadjusted**

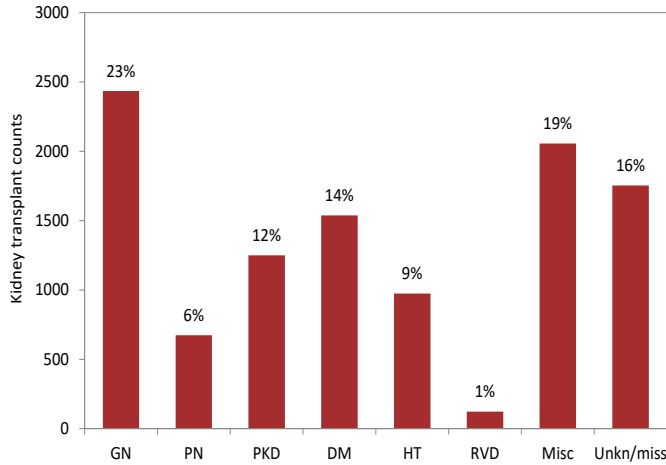

Abbreviations used: GN: glomerulonephritis/sclerosis; PN: pyelonephritis; PKD: polycystic kidneys, adult type; DM: diabetes mellitus; HT: hypertension; RVD: renal vascular disease; Misc: miscellaneous; Unkn/miss: unknown/missing  
 The percentages in this figure sum up to 100% for all age groups together

**Figure A.7.6**  
**Donor type distribution by primary renal disease in kidney transplant recipients**

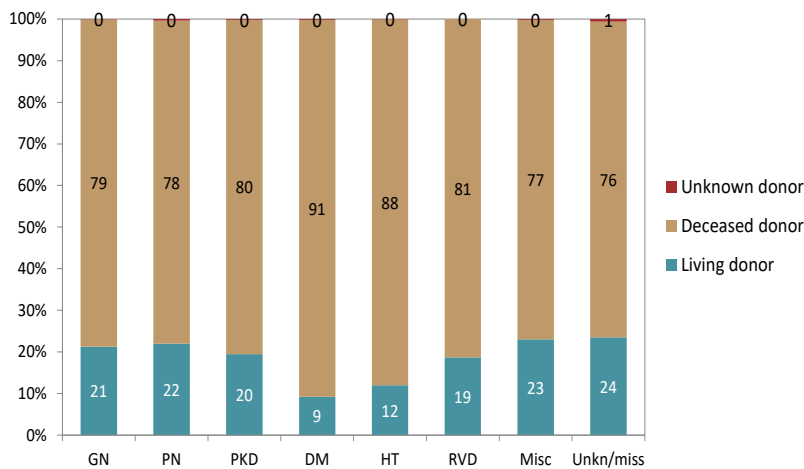

Abbreviations used: GN: glomerulonephritis/sclerosis; PN: pyelonephritis; PKD: polycystic kidneys, adult type; DM: diabetes mellitus; HT: hypertension; RVD: renal vascular disease; Misc: miscellaneous; Unkn/miss: unknown/missing

**Figure A.7.7**  
**Patient survival probability by primary renal disease: Incident dialysis patients**  
*from day 91, adjusted for age and sex*

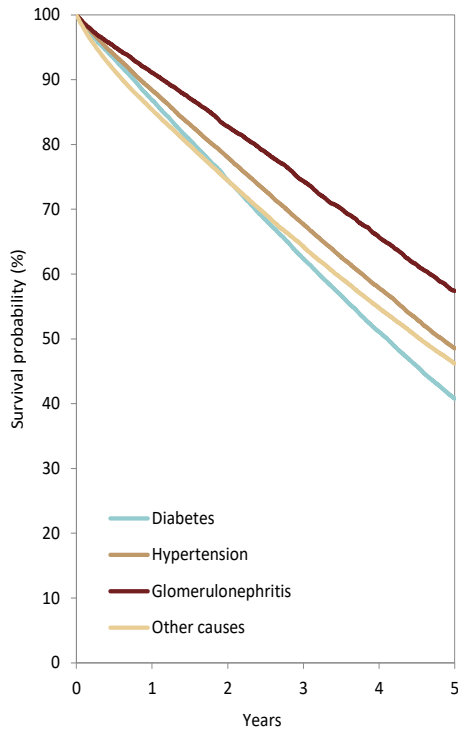

**Figure A.7.8**  
**Patient survival probability by primary renal disease: Patients receiving a first kidney transplant**  
*from day of transplant, adjusted for age and sex*

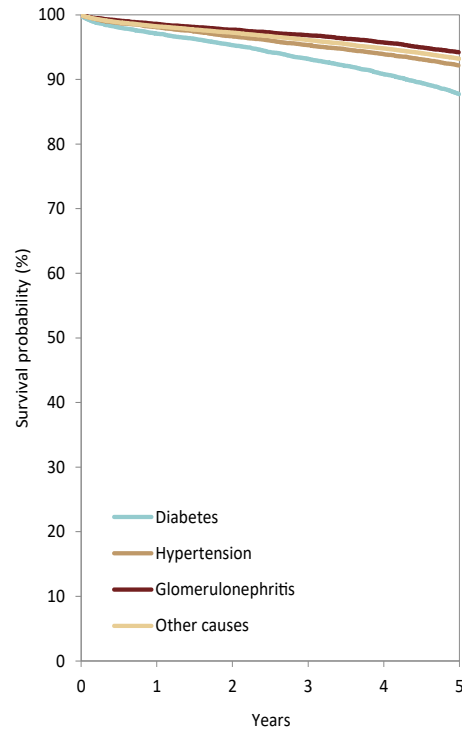

**Section B: Individual patient data reference tables**



Table B.1.1  
General population data and number of renal centres

|                                  | General population of country/region in thousands | % Coverage of general population by the registry for individual patient data | Total number of renal centres of country/region | Number of renal centres collaborating with the registry for individual patient data |
|----------------------------------|---------------------------------------------------|------------------------------------------------------------------------------|-------------------------------------------------|-------------------------------------------------------------------------------------|
| Austria //                       | 8901                                              | 100                                                                          | 77                                              | 76                                                                                  |
| Belgium, Dutch-speaking          | 6654                                              | 100                                                                          | 27                                              | 27                                                                                  |
| Belgium, French-speaking         | 4890                                              | 100                                                                          | 24                                              | 24                                                                                  |
| Bosnia and Herzegovina           | 3531                                              | 100                                                                          | 29                                              | 29                                                                                  |
| Denmark                          | 5888                                              | 100                                                                          | 15                                              | 15                                                                                  |
| Estonia                          | 1330                                              | 100                                                                          | 3                                               | 3                                                                                   |
| Finland                          | 5530                                              | 100                                                                          | 30                                              | 30                                                                                  |
| France                           | 67488                                             | 100                                                                          | 1481                                            | 1481                                                                                |
| Greece                           | 10699                                             | 100                                                                          | 200                                             | 200                                                                                 |
| Iceland                          | 366                                               | 100                                                                          | 1                                               | 1                                                                                   |
| Montenegro                       | 621                                               | 100                                                                          | 12                                              | 12                                                                                  |
| Norway                           | 5379                                              | 100                                                                          | 27                                              | 27                                                                                  |
| Romania                          | 19265                                             | 95.0                                                                         | 143                                             | 141                                                                                 |
| Serbia                           | 6899                                              | 90.0                                                                         | 64                                              | 54                                                                                  |
| Spain, Andalusia                 | 8490                                              | 100                                                                          | 62                                              | 62                                                                                  |
| Spain, Aragon                    | 1331                                              | 100                                                                          | 10                                              | 10                                                                                  |
| Spain, Asturias                  | 1016                                              | 100                                                                          | 11                                              | 11                                                                                  |
| Spain, Basque country            | 2188                                              | 100                                                                          | 10                                              | 10                                                                                  |
| Spain, Canary Islands §          | 2241                                              | 100                                                                          | 22                                              | 15                                                                                  |
| Spain, Cantabria                 | 583                                               | 100                                                                          | 2                                               | 2                                                                                   |
| Spain, Castile and León          | 2395                                              | 100                                                                          | 22                                              | 22                                                                                  |
| Spain, Castile-La Mancha         | 2047                                              | 100                                                                          | 12                                              | 12                                                                                  |
| Spain, Catalonia                 | 7780                                              | 100                                                                          | 48                                              | 48                                                                                  |
| Spain, Community of Madrid       | 6780                                              | 100                                                                          | 38                                              | 38                                                                                  |
| Spain, Extremadura               | 1064                                              | 100                                                                          | 13                                              | 13                                                                                  |
| Spain, Galicia                   | 2700                                              | 100                                                                          | 26                                              | 26                                                                                  |
| Spain, La Rioja                  | 316                                               | 100                                                                          | 3                                               | 3                                                                                   |
| Spain, Murcia                    | 1511                                              | 100                                                                          | 14                                              | 14                                                                                  |
| Spain, Navarre                   | 657                                               | 100                                                                          | 3                                               | 3                                                                                   |
| Spain, Valencian region          | 5057                                              | 100                                                                          | 48                                              | 48                                                                                  |
| Sweden                           | 10353                                             | 100                                                                          | 67                                              | 67                                                                                  |
| Switzerland                      | 8638                                              | 100                                                                          | 95                                              | 95                                                                                  |
| the Netherlands ‡                | 17442                                             | 94.0                                                                         | 60                                              | 60                                                                                  |
| United Kingdom, England          | 56550                                             | 100                                                                          | 51                                              | 51                                                                                  |
| United Kingdom, Northern Ireland | 1896                                              | 100                                                                          | 5                                               | 5                                                                                   |
| United Kingdom, Scotland         | 5466                                              | 100                                                                          | 10                                              | 10                                                                                  |
| United Kingdom, Wales            | 3170                                              | 100                                                                          | 5                                               | 5                                                                                   |

// No data from one centre treating haemodialysis patients only, it is estimated that most of these patients are covered by other centres

§ No data from 7 centers which treat foreign patients only

‡ The percentage coverage is different for the incidence (94%), prevalence (96%) and transplant activity (98%) calculations

Table B.2.1  
**Incident counts and percentages by age and sex**  
*at day 1*

|                                    | All      |          |          | 0-19 |     |       |     |     |       | 20-44 |     |       |     |     |       | 45-64 |     |       |     |     |       | 65-74 |     |       |    |      |    | 75+  |    |      |    |      |    |
|------------------------------------|----------|----------|----------|------|-----|-------|-----|-----|-------|-------|-----|-------|-----|-----|-------|-------|-----|-------|-----|-----|-------|-------|-----|-------|----|------|----|------|----|------|----|------|----|
|                                    | All      | Men      | Women    | All  | Men | Women | All | Men | Women | All   | Men | Women | All | Men | Women | All   | Men | Women | All | Men | Women | All   | Men | Women |    |      |    |      |    |      |    |      |    |
|                                    | N (100%) | N (100%) | N (100%) | N    | %   | N     | %   | N   | %     | N     | %   | N     | %   | N   | %     | N     | %   | N     | %   | N   | %     | N     | %   | N     | %  | N    | %  |      |    |      |    |      |    |
| Austria §                          | 1085     | 723      | 362      | 13   | 1   | 9     | 1   | 4   | 1     | 114   | 11  | 70    | 10  | 44  | 12    | 326   | 30  | 233   | 32  | 93  | 26    | 299   | 28  | 205   | 28 | 94   | 26 | 333  | 31 | 206  | 28 | 127  | 35 |
| Belgium, Dutch-speaking *          | 1156     | 739      | 417      |      |     |       |     |     |       | 61    | 5   | 38    | 5   | 23  | 6     | 260   | 22  | 174   | 24  | 86  | 21    | 314   | 27  | 202   | 27 | 112  | 27 | 521  | 45 | 325  | 44 | 196  | 47 |
| Belgium, French-speaking *         | 944      | 593      | 351      |      |     |       |     |     |       | 64    | 7   | 42    | 7   | 22  | 6     | 281   | 30  | 176   | 30  | 105 | 30    | 312   | 33  | 197   | 33 | 115  | 33 | 287  | 30 | 178  | 30 | 109  | 31 |
| Bosnia and Herzegovina             | 408      | 253      | 155      | 6    | 1   | 3     | 1   | 3   | 2     | 37    | 9   | 24    | 9   | 13  | 8     | 160   | 39  | 102   | 40  | 58  | 37    | 128   | 31  | 82    | 32 | 46   | 30 | 77   | 19 | 42   | 17 | 35   | 23 |
| Denmark                            | 707      | 473      | 234      | 9    | 1   | 4     | 1   | 5   | 2     | 67    | 9   | 50    | 11  | 17  | 7     | 231   | 33  | 157   | 33  | 74  | 32    | 214   | 30  | 144   | 30 | 70   | 30 | 186  | 26 | 118  | 25 | 68   | 29 |
| Estonia                            | 76       | 40       | 36       | 2    | 3   | 1     | 3   | 1   | 3     | 10    | 13  | 4     | 10  | 6   | 17    | 30    | 39  | 15    | 38  | 15  | 42    | 21    | 28  | 11    | 28 | 10   | 28 | 13   | 17 | 9    | 23 | 4    | 11 |
| Finland                            | 522      | 327      | 195      | 11   | 2   | 7     | 2   | 4   | 2     | 88    | 17  | 44    | 13  | 44  | 23    | 164   | 31  | 101   | 31  | 63  | 32    | 156   | 30  | 104   | 32 | 52   | 27 | 103  | 20 | 71   | 22 | 32   | 16 |
| France                             | 10696    | 6975     | 3721     | 120  | 1   | 70    | 1   | 50  | 1     | 949   | 9   | 599   | 9   | 350 | 9     | 2669  | 25  | 1694  | 24  | 975 | 26    | 3118  | 29  | 2072  | 30 | 1046 | 28 | 3840 | 36 | 2540 | 36 | 1300 | 35 |
| Greece                             | 2749     | 1837     | 912      | 12   | 0   | 8     | 0   | 4   | 0     | 120   | 4   | 81    | 4   | 39  | 4     | 593   | 22  | 398   | 22  | 195 | 21    | 736   | 27  | 522   | 28 | 214  | 23 | 1288 | 47 | 828  | 45 | 460  | 50 |
| Iceland                            | 38       | 23       | 15       | 1    | 3   | 1     | 4   | 0   | 0     | 4     | 11  | 3     | 13  | 1   | 7     | 9     | 24  | 2     | 9   | 7   | 47    | 8     | 21  | 7     | 30 | 1    | 7  | 16   | 42 | 10   | 43 | 6    | 40 |
| Montenegro *                       | 75       | 52       | 23       |      |     |       |     |     |       | 11    | 15  | 6     | 12  | 5   | 22    | 34    | 45  | 24    | 46  | 10  | 43    | 17    | 23  | 13    | 25 | 4    | 17 | 13   | 17 | 9    | 17 | 4    | 17 |
| Norway                             | 543      | 369      | 174      | 13   | 2   | 8     | 2   | 5   | 3     | 71    | 13  | 53    | 14  | 18  | 10    | 175   | 32  | 112   | 30  | 63  | 36    | 153   | 28  | 106   | 29 | 47   | 27 | 131  | 24 | 90   | 24 | 41   | 24 |
| Romania                            | 2990     | 1779     | 1211     | 29   | 1   | 18    | 1   | 11  | 1     | 326   | 11  | 208   | 12  | 118 | 10    | 1185  | 40  | 746   | 42  | 439 | 36    | 943   | 32  | 536   | 30 | 407  | 34 | 507  | 17 | 271  | 15 | 236  | 19 |
| Serbia                             | 474      | 299      | 175      | 8    | 2   | 6     | 2   | 2   | 1     | 60    | 13  | 38    | 13  | 22  | 13    | 201   | 42  | 130   | 43  | 71  | 41    | 143   | 30  | 86    | 29 | 57   | 33 | 62   | 13 | 39   | 13 | 23   | 13 |
| Spain, Andalusia                   | 1185     | 756      | 429      | 17   | 1   | 12    | 2   | 5   | 1     | 121   | 10  | 62    | 8   | 59  | 14    | 378   | 32  | 267   | 35  | 111 | 26    | 342   | 29  | 209   | 28 | 133  | 31 | 327  | 28 | 206  | 27 | 121  | 28 |
| Spain, Aragon                      | 182      | 136      | 46       | 3    | 2   | 1     | 1   | 2   | 4     | 21    | 12  | 15    | 11  | 6   | 13    | 56    | 31  | 39    | 29  | 17  | 37    | 50    | 27  | 36    | 26 | 14   | 30 | 52   | 29 | 45   | 33 | 7    | 15 |
| Spain, Asturias                    | 170      | 112      | 58       | 2    | 1   | 2     | 2   | 0   | 0     | 9     | 5   | 8     | 7   | 1   | 2     | 45    | 26  | 33    | 29  | 12  | 21    | 58    | 34  | 35    | 31 | 23   | 40 | 56   | 33 | 34   | 30 | 22   | 38 |
| Spain, Basque country              | 288      | 202      | 86       | 6    | 2   | 1     | 0   | 5   | 6     | 24    | 8   | 16    | 8   | 8   | 9     | 80    | 28  | 59    | 29  | 21  | 24    | 88    | 31  | 60    | 30 | 28   | 33 | 90   | 31 | 66   | 33 | 24   | 28 |
| Spain, Canary Islands              | 382      | 263      | 119      | 4    | 1   | 3     | 1   | 1   | 1     | 37    | 10  | 26    | 10  | 11  | 9     | 131   | 34  | 86    | 33  | 45  | 38    | 115   | 30  | 83    | 32 | 32   | 27 | 95   | 25 | 65   | 25 | 30   | 25 |
| Spain, Cantabria *                 | 73       | 54       | 19       |      |     |       |     |     |       | 8     | 11  | 6     | 11  | 2   | 11    | 18    | 25  | 12    | 22  | 6   | 32    | 30    | 41  | 21    | 39 | 9    | 47 | 17   | 23 | 15   | 28 | 2    | 11 |
| Spain, Castile and León *          | 285      | 194      | 91       |      |     |       |     |     |       | 15    | 5   | 12    | 6   | 3   | 3     | 80    | 28  | 55    | 28  | 25  | 27    | 87    | 31  | 61    | 31 | 26   | 29 | 103  | 36 | 66   | 34 | 37   | 41 |
| Spain, Castile-La Mancha *         | 215      | 142      | 73       |      |     |       |     |     |       | 14    | 7   | 5     | 4   | 9   | 12    | 90    | 42  | 67    | 47  | 23  | 32    | 57    | 27  | 39    | 27 | 18   | 25 | 54   | 25 | 31   | 22 | 23   | 32 |
| Spain, Catalonia                   | 1336     | 893      | 443      | 20   | 1   | 12    | 1   | 8   | 2     | 102   | 8   | 68    | 8   | 34  | 8     | 376   | 28  | 229   | 26  | 147 | 33    | 367   | 27  | 262   | 29 | 105  | 24 | 471  | 35 | 322  | 36 | 149  | 34 |
| Spain, Community of Madrid         | 745      | 511      | 234      | 7    | 1   | 4     | 1   | 3   | 1     | 88    | 12  | 58    | 11  | 32  | 14    | 231   | 31  | 166   | 32  | 65  | 28    | 199   | 27  | 140   | 27 | 59   | 25 | 220  | 30 | 145  | 28 | 75   | 32 |
| Spain, Extremadura                 | 150      | 103      | 47       | 0    | 0   | 0     | 0   | 0   | 0     | 9     | 6   | 8     | 8   | 1   | 2     | 57    | 38  | 39    | 38  | 18  | 38    | 44    | 29  | 31    | 30 | 13   | 28 | 40   | 27 | 25   | 24 | 15   | 32 |
| Spain, Galicia                     | 393      | 289      | 104      | 1    | 0   | 1     | 0   | 0   | 0     | 23    | 6   | 16    | 6   | 7   | 7     | 124   | 32  | 91    | 31  | 33  | 32    | 116   | 30  | 85    | 29 | 31   | 30 | 129  | 33 | 96   | 33 | 33   | 32 |
| Spain, La Rioja                    | 33       | 18       | 15       | 0    | 0   | 0     | 0   | 0   | 0     | 2     | 6   | 0     | 0   | 2   | 13    | 11    | 33  | 7     | 39  | 4   | 27    | 8     | 24  | 4     | 22 | 4    | 27 | 12   | 36 | 7    | 39 | 5    | 33 |
| Spain, Murcia                      | 212      | 149      | 63       | 2    | 1   | 1     | 1   | 1   | 2     | 20    | 9   | 13    | 9   | 7   | 11    | 69    | 33  | 49    | 33  | 20  | 32    | 64    | 30  | 49    | 33 | 15   | 24 | 57   | 27 | 37   | 25 | 20   | 32 |
| Spain, Navarre *                   | 70       | 46       | 24       |      |     |       |     |     |       | 15    | 21  | 6     | 13  | 9   | 38    | 17    | 24  | 12    | 26  | 5   | 21    | 18    | 26  | 14    | 30 | 4    | 17 | 20   | 29 | 14   | 30 | 6    | 25 |
| Spain, Valencian region            | 773      | 526      | 247      | 3    | 0   | 2     | 0   | 1   | 0     | 63    | 8   | 50    | 10  | 13  | 5     | 224   | 29  | 146   | 28  | 78  | 32    | 220   | 28  | 156   | 30 | 64   | 26 | 263  | 34 | 172  | 33 | 91   | 37 |
| Sweden                             | 1137     | 780      | 357      | 23   | 2   | 14    | 2   | 9   | 3     | 137   | 12  | 92    | 12  | 45  | 13    | 313   | 28  | 211   | 27  | 102 | 29    | 320   | 28  | 228   | 29 | 92   | 26 | 344  | 30 | 235  | 30 | 109  | 31 |
| Switzerland                        | 846      | 557      | 289      | 13   | 2   | 10    | 2   | 3   | 1     | 90    | 11  | 56    | 10  | 34  | 12    | 250   | 30  | 156   | 28  | 94  | 33    | 221   | 26  | 142   | 25 | 79   | 27 | 272  | 32 | 193  | 35 | 79   | 27 |
| the Netherlands ‡                  | 1861     | 1190     | 671      | 30   | 2   | 14    | 1   | 16  | 2     | 201   | 11  | 118   | 10  | 83  | 12    | 586   | 31  | 361   | 30  | 225 | 34    | 558   | 30  | 355   | 30 | 203  | 30 | 486  | 26 | 342  | 29 | 144  | 21 |
| United Kingdom, England #          | 6097     | 3957     | 2140     | 139  | 2   | 80    | 2   | 59  | 3     | 868   | 14  | 533   | 13  | 335 | 16    | 2252  | 37  | 1456  | 37  | 796 | 37    | 1502  | 25  | 969   | 24 | 533  | 25 | 1336 | 22 | 919  | 23 | 417  | 19 |
| United Kingdom, Northern Ireland # | 206      | 129      | 77       |      |     |       |     |     |       | 37    | 18  | 23    | 18  | 14  | 18    | 66    | 32  | 42    | 33  | 24  | 31    | 55    | 27  | 35    | 27 | 20   | 26 | 43   | 21 | 27   | 21 | 16   | 21 |
| United Kingdom, Scotland           | 542      | 336      | 206      | 9    | 2   | 6     | 2   | 3   | 1     | 84    | 15  | 54    | 16  | 30  | 15    | 199   | 37  | 124   | 37  | 75  | 36    | 139   | 26  | 93    | 28 | 46   | 22 | 111  | 20 | 59   | 18 | 52   | 25 |
| United Kingdom, Wales #            | 356      | 233      | 123      | 9    | 3   |       |     |     |       | 52    | 15  | 31    | 13  | 21  | 17    | 113   | 32  | 62    | 27  | 51  | 41    | 99    | 28  | 71    | 30 | 28   | 23 | 83   | 23 | 64   | 27 | 19   | 15 |

Categories may not add up because of missing values or rounding off

§ The incidence is underestimated by approximately 1% due to one hemodialysis centre not submitting data

\* Patients younger than 20 years of age are not reported

‡ The incidence is underestimated by approximately 7%

# Values based on 1 to 5 patients are suppressed

Table B.2.2  
Incidence per million (age-related) population by age and sex, unadjusted  
at day 1

|                                    | All   |       |       | 0-19  |       |       | 20-44 |       |       | 45-64 |       |       | 65-74 |       |       | 75+    |        |       |
|------------------------------------|-------|-------|-------|-------|-------|-------|-------|-------|-------|-------|-------|-------|-------|-------|-------|--------|--------|-------|
|                                    | All   | Men   | Women | All    | Men    | Women |
|                                    | Pmp   | Pmp   | Pmp   | Pmarp  | Pmarp  | Pmarp |
| Austria §                          | 121.9 | 165.1 | 80.0  | 7.6   | 10.2  | 4.8   | 39.3  | 47.5  | 30.8  | 126.1 | 181.5 | 71.5  | 355.1 | 521.4 | 209.4 | 391.0  | 601.0  | 249.6 |
| Belgium, Dutch-speaking *          | 173.7 | 224.2 | 124.2 |       |       |       | 29.9  | 36.9  | 22.7  | 143.3 | 190.1 | 95.7  | 442.2 | 583.3 | 307.9 | 792.8  | 1193.9 | 509.2 |
| Belgium, French-speaking *         | 193.0 | 247.3 | 140.9 |       |       |       | 39.4  | 51.4  | 27.2  | 221.4 | 278.1 | 165.1 | 660.2 | 897.0 | 454.7 | 760.3  | 1248.1 | 464.1 |
| Bosnia and Herzegovina             | 115.5 | 146.1 | 86.2  | 7.6   | 7.4   | 7.8   | 30.2  | 38.6  | 21.6  | 157.0 | 205.3 | 111.0 | 435.3 | 636.1 | 278.6 | 370.2  | 523.5  | 274.0 |
| Denmark                            | 120.1 | 161.4 | 79.1  | 6.9   | 6.0   | 7.8   | 36.2  | 53.2  | 18.7  | 148.4 | 201.5 | 95.2  | 332.3 | 460.9 | 211.1 | 352.9  | 518.7  | 227.0 |
| Estonia                            | 57.2  | 63.5  | 51.5  | 7.1   | 6.9   | 7.3   | 23.2  | 17.9  | 29.1  | 86.0  | 89.3  | 83.0  | 147.1 | 192.6 | 116.7 | 103.4  | 247.8  | 44.8  |
| Finland                            | 94.4  | 119.7 | 69.7  | 9.5   | 11.8  | 7.0   | 50.9  | 49.4  | 52.5  | 117.6 | 144.8 | 90.4  | 220.5 | 310.1 | 139.8 | 192.1  | 333.9  | 98.9  |
| France                             | 158.5 | 213.8 | 106.7 | 7.4   | 8.5   | 6.3   | 47.5  | 60.7  | 34.5  | 153.0 | 199.2 | 109.1 | 416.9 | 594.1 | 262.1 | 600.8  | 1018.3 | 333.6 |
| Greece                             | 256.9 | 352.9 | 166.0 | 5.8   | 7.5   | 4.0   | 37.1  | 49.5  | 24.5  | 197.5 | 277.1 | 124.5 | 623.0 | 952.7 | 337.8 | 1059.5 | 1602.1 | 658.3 |
| Iceland                            | 103.7 | 122.3 | 84.0  | 11.0  | 21.5  | 0     | 29.8  | 42.2  | 15.8  | 102.6 | 44.8  | 162.5 | 257.3 | 449.0 | 64.5  | 716.7  | 996.8  | 488.1 |
| Montenegro *                       | 120.7 | 169.3 | 73.2  |       |       |       | 52.2  | 55.9  | 48.4  | 209.7 | 303.2 | 120.5 | 275.5 | 464.2 | 118.7 | 359.3  | 626.4  | 183.4 |
| Norway                             | 100.9 | 136.0 | 65.3  | 10.5  | 12.5  | 8.3   | 39.6  | 57.6  | 20.7  | 125.8 | 157.7 | 92.5  | 284.7 | 398.7 | 173.1 | 314.6  | 503.7  | 172.5 |
| Romania                            | 163.4 | 198.7 | 129.5 | 7.5   | 9.1   | 5.9   | 55.2  | 68.3  | 41.2  | 235.1 | 297.1 | 173.5 | 464.9 | 609.9 | 354.0 | 344.7  | 507.0  | 252.1 |
| Serbia                             | 76.3  | 98.9  | 54.9  | 6.6   | 9.7   | 3.4   | 30.1  | 37.4  | 22.5  | 118.2 | 157.5 | 81.2  | 177.0 | 237.0 | 128.1 | 123.4  | 196.1  | 75.7  |
| Spain, Andalusia                   | 139.6 | 180.5 | 99.7  | 9.6   | 13.1  | 5.8   | 44.2  | 44.7  | 43.6  | 152.1 | 216.6 | 88.6  | 437.0 | 563.6 | 322.9 | 462.5  | 724.1  | 286.3 |
| Spain, Aragon                      | 136.8 | 207.0 | 68.3  | 12.0  | 7.8   | 16.6  | 52.9  | 74.2  | 30.7  | 142.0 | 195.3 | 87.3  | 363.3 | 550.0 | 194.0 | 342.0  | 736.6  | 77.0  |
| Spain, Asturias                    | 167.3 | 230.7 | 109.4 | 13.4  | 26.1  | 0     | 33.0  | 58.3  | 7.4   | 137.4 | 206.6 | 71.5  | 434.0 | 567.2 | 319.8 | 420.0  | 674.8  | 265.3 |
| Spain, Basque country              | 131.7 | 190.9 | 76.2  | 14.8  | 4.8   | 25.4  | 39.2  | 52.4  | 26.1  | 119.8 | 179.3 | 62.0  | 353.0 | 514.8 | 210.9 | 355.0  | 672.2  | 154.5 |
| Spain, Canary Islands              | 170.5 | 237.0 | 105.2 | 10.0  | 14.6  | 5.2   | 48.4  | 68.2  | 28.7  | 186.5 | 243.5 | 128.9 | 561.7 | 844.4 | 300.6 | 555.6  | 902.8  | 303.0 |
| Spain, Cantabria *                 | 125.2 | 190.0 | 63.6  |       |       |       | 47.5  | 70.4  | 24.0  | 99.3  | 133.7 | 65.6  | 447.9 | 665.1 | 254.2 | 265.2  | 608.4  | 50.7  |
| Spain, Castile and León *          | 119.0 | 164.6 | 74.8  |       |       |       | 22.8  | 35.7  | 9.3   | 108.2 | 147.6 | 68.2  | 313.7 | 446.4 | 184.8 | 306.2  | 485.9  | 184.5 |
| Spain, Castile-La Mancha *         | 105.0 | 138.2 | 71.6  |       |       |       | 21.7  | 15.0  | 28.8  | 150.2 | 218.9 | 78.5  | 311.3 | 436.5 | 192.0 | 261.1  | 362.8  | 189.6 |
| Spain, Catalonia                   | 171.7 | 233.3 | 112.1 | 12.8  | 14.8  | 10.5  | 39.9  | 52.4  | 27.0  | 171.9 | 210.2 | 133.9 | 493.9 | 760.7 | 263.4 | 649.3  | 1126.4 | 339.0 |
| Spain, Community of Madrid         | 109.9 | 157.5 | 66.2  | 5.2   | 5.8   | 4.5   | 38.5  | 49.9  | 27.5  | 119.7 | 179.6 | 64.6  | 324.6 | 511.3 | 173.9 | 369.3  | 634.2  | 204.3 |
| Spain, Extremadura                 | 141.0 | 195.7 | 87.4  | 0     | 0     | 0     | 27.7  | 48.2  | 6.3   | 178.0 | 240.8 | 113.7 | 418.8 | 604.4 | 241.8 | 338.4  | 532.3  | 210.6 |
| Spain, Galicia                     | 145.6 | 221.8 | 74.5  | 2.3   | 4.5   | 0     | 29.9  | 41.3  | 18.3  | 152.4 | 228.3 | 79.5  | 359.0 | 560.3 | 180.9 | 351.0  | 662.3  | 148.3 |
| Spain, La Rioja                    | 104.4 | 115.6 | 93.5  | 0     | 0     | 0     | 21.3  | 0     | 42.7  | 117.1 | 148.2 | 85.7  | 245.7 | 251.3 | 240.4 | 343.4  | 493.9  | 240.7 |
| Spain, Murcia                      | 140.3 | 196.9 | 83.5  | 5.8   | 5.7   | 6.0   | 39.0  | 49.2  | 28.2  | 165.1 | 232.5 | 96.5  | 517.5 | 840.0 | 229.6 | 498.7  | 798.3  | 294.4 |
| Spain, Navarre *                   | 106.5 | 141.7 | 72.2  |       |       |       | 75.4  | 59.8  | 91.2  | 89.0  | 124.5 | 52.9  | 275.4 | 443.0 | 118.5 | 301.3  | 521.1  | 151.8 |
| Spain, Valencian region            | 152.8 | 211.1 | 96.3  | 3.0   | 3.9   | 2.1   | 39.4  | 61.6  | 16.5  | 150.9 | 197.7 | 104.6 | 430.5 | 651.7 | 235.6 | 558.7  | 902.3  | 324.9 |
| Sweden                             | 109.8 | 149.7 | 69.4  | 9.5   | 11.3  | 7.7   | 41.2  | 53.6  | 27.9  | 123.2 | 164.3 | 81.2  | 292.5 | 424.6 | 165.2 | 350.0  | 545.7  | 197.4 |
| Switzerland                        | 97.9  | 130.0 | 66.4  | 7.6   | 11.3  | 3.6   | 31.3  | 38.4  | 24.0  | 103.0 | 127.9 | 77.9  | 265.0 | 355.9 | 181.7 | 347.0  | 593.5  | 172.3 |
| the Netherlands                    | 113.5 | 146.1 | 81.4  | 8.5   | 7.7   | 9.3   | 39.4  | 45.8  | 32.8  | 129.1 | 159.1 | 99.1  | 303.5 | 392.8 | 217.1 | 352.0  | 580.3  | 181.9 |
| United Kingdom, England #          | 107.8 | 141.4 | 74.9  | 10.4  | 11.7  | 9.1   | 47.5  | 57.8  | 36.9  | 155.6 | 204.0 | 108.5 | 268.3 | 360.0 | 183.4 | 274.6  | 437.7  | 150.8 |
| United Kingdom, Northern Ireland # | 108.7 | 138.1 | 80.1  |       |       |       | 61.6  | 76.8  | 46.4  | 134.7 | 175.3 | 95.8  | 318.4 | 417.2 | 225.1 | 292.1  | 433.7  | 188.4 |
| United Kingdom, Scotland           | 99.2  | 126.1 | 73.6  | 7.9   | 10.3  | 5.4   | 47.4  | 61.2  | 33.7  | 133.1 | 171.6 | 97.1  | 237.1 | 331.6 | 150.4 | 236.3  | 302.0  | 189.5 |
| United Kingdom, Wales #            | 112.3 | 149.0 | 76.6  | 12.8  |       |       | 53.6  | 63.1  | 43.8  | 136.3 | 153.7 | 119.8 | 273.6 | 405.0 | 150.1 | 270.6  | 479.5  | 109.6 |

§ The incidence is underestimated by approximately 1% due to one hemodialysis centre not submitting data

\* Patients younger than 20 years of age are not reported

# Values based on 1 to 5 patients are suppressed

Table B.2.3  
**Sex, mean age, and median age of incident patients**  
*at day 1*

|                                  | All |              |      |                |      |      | Men  |              |      |                |      |      | Women |              |      |                |      |      |
|----------------------------------|-----|--------------|------|----------------|------|------|------|--------------|------|----------------|------|------|-------|--------------|------|----------------|------|------|
|                                  | %   | Mean (years) | SD   | Median (years) | P25  | P75  | %    | Mean (years) | SD   | Median (years) | P25  | P75  | %     | Mean (years) | SD   | Median (years) | P25  | P75  |
| Austria                          | 100 | 65.0         | 15.9 | 68.6           | 56.6 | 76.7 | 66.6 | 64.7         | 15.6 | 67.5           | 56.5 | 76.3 | 33.4  | 65.6         | 16.4 | 70.2           | 57.3 | 77.9 |
| Belgium, Dutch-speaking *        | 100 | 71.0         | 13.4 | 73.5           | 63.4 | 81.3 | 63.9 | 70.8         | 13.4 | 73.2           | 62.9 | 81.0 | 36.1  | 71.3         | 13.5 | 74.2           | 64.2 | 82.0 |
| Belgium, French-speaking *       | 100 | 67.6         | 13.4 | 69.6           | 59.6 | 77.1 | 62.8 | 67.2         | 13.3 | 69.3           | 59.5 | 76.6 | 37.2  | 68.3         | 13.4 | 69.8           | 59.9 | 78.8 |
| Bosnia and Herzegovina           | 100 | 63.0         | 14.1 | 65.0           | 56.9 | 72.6 | 62.0 | 62.5         | 13.7 | 64.8           | 55.8 | 71.1 | 38.0  | 63.9         | 14.7 | 65.4           | 57.5 | 74.2 |
| Denmark                          | 100 | 64.3         | 15.4 | 67.1           | 55.5 | 75.5 | 66.9 | 63.8         | 15.2 | 66.4           | 54.7 | 74.9 | 33.1  | 65.3         | 15.9 | 67.6           | 56.8 | 76.4 |
| Estonia                          | 100 | 60.2         | 16.5 | 63.4           | 51.5 | 72.2 | 52.6 | 61.5         | 15.9 | 64.9           | 50.4 | 73.9 | 47.4  | 58.8         | 17.2 | 62.9           | 54.7 | 69.2 |
| Finland                          | 100 | 61.0         | 16.8 | 64.6           | 51.2 | 73.2 | 62.6 | 62.6         | 16.3 | 66.7           | 53.1 | 74.5 | 37.4  | 58.3         | 17.4 | 62.2           | 47.1 | 70.6 |
| France                           | 100 | 67.5         | 16.0 | 70.5           | 59.6 | 79.0 | 65.2 | 67.7         | 15.7 | 70.8           | 60.3 | 78.9 | 34.8  | 66.9         | 16.5 | 70.1           | 58.0 | 79.1 |
| Greece                           | 100 | 71.5         | 13.9 | 74.2           | 64.5 | 81.9 | 66.8 | 71.2         | 13.7 | 73.8           | 64.4 | 81.5 | 33.2  | 72.0         | 14.2 | 75.1           | 64.7 | 82.8 |
| Iceland                          | 100 | 65.3         | 18.3 | 72.2           | 56.4 | 77.9 | 60.5 | 65.5         | 21.0 | 73.1           | 59.5 | 77.9 | 39.5  | 65.0         | 13.9 | 64.5           | 54.9 | 78.6 |
| Montenegro *                     | 100 | 61.3         | 13.4 | 63.0           | 54.4 | 69.2 | 69.3 | 62.3         | 12.6 | 63.6           | 56.8 | 69.0 | 30.7  | 59.1         | 15.1 | 61.1           | 47.2 | 70.2 |
| Norway                           | 100 | 62.3         | 17.0 | 65.9           | 53.0 | 74.8 | 68.0 | 62.1         | 17.2 | 66.8           | 52.0 | 74.8 | 32.0  | 62.7         | 16.8 | 65.1           | 54.7 | 74.7 |
| Romania                          | 100 | 62.2         | 14.3 | 64.6           | 53.2 | 71.9 | 59.5 | 61.3         | 14.3 | 63.6           | 52.6 | 71.4 | 40.5  | 63.3         | 14.2 | 65.9           | 55.1 | 73.1 |
| Serbia                           | 100 | 60.3         | 14.4 | 63.1           | 52.5 | 70.1 | 63.1 | 60.0         | 14.7 | 62.2           | 52.9 | 70.0 | 36.9  | 60.9         | 13.9 | 63.8           | 51.7 | 70.6 |
| Spain, Andalusia                 | 100 | 64.4         | 15.5 | 67.7           | 56.4 | 75.9 | 63.8 | 64.6         | 15.2 | 67.1           | 57.0 | 75.9 | 36.2  | 64.1         | 16.0 | 68.2           | 55.7 | 76.2 |
| Spain, Aragon                    | 100 | 64.5         | 16.2 | 68.2           | 55.8 | 76.3 | 74.7 | 66.1         | 15.6 | 69.9           | 57.7 | 77.4 | 25.3  | 59.8         | 17.2 | 61.3           | 51.8 | 73.4 |
| Spain, Asturias                  | 100 | 67.1         | 15.1 | 69.6           | 61.2 | 77.0 | 65.9 | 65.7         | 16.0 | 68.6           | 59.5 | 76.6 | 34.1  | 70.0         | 12.9 | 70.4           | 65.8 | 78.5 |
| Spain, Basque country            | 100 | 65.4         | 15.8 | 69.3           | 57.8 | 76.6 | 70.1 | 66.5         | 14.5 | 69.9           | 59.7 | 76.6 | 29.9  | 63.0         | 18.4 | 67.6           | 56.1 | 75.7 |
| Spain, Canary Islands            | 100 | 64.0         | 14.8 | 66.5           | 55.8 | 75.0 | 68.8 | 64.0         | 14.8 | 66.9           | 55.2 | 74.7 | 31.2  | 64.1         | 14.7 | 65.2           | 56.1 | 75.1 |
| Spain, Cantabria *               | 100 | 65.4         | 13.2 | 67.0           | 60.6 | 74.2 | 74.0 | 66.5         | 13.4 | 67.5           | 61.5 | 75.4 | 26.0  | 62.1         | 12.4 | 65.5           | 58.0 | 68.3 |
| Spain, Castile and León *        | 100 | 69.0         | 12.7 | 70.9           | 62.0 | 78.7 | 68.1 | 68.7         | 12.9 | 70.8           | 62.6 | 78.7 | 31.9  | 69.5         | 12.3 | 72.2           | 61.5 | 78.7 |
| Spain, Castile-La Mancha *       | 100 | 65.1         | 13.2 | 66.2           | 55.6 | 75.6 | 66.0 | 65.3         | 11.6 | 64.8           | 58.0 | 73.9 | 34.0  | 64.8         | 15.9 | 67.4           | 52.4 | 78.3 |
| Spain, Catalonia                 | 100 | 66.8         | 15.4 | 70.4           | 57.8 | 78.3 | 66.8 | 67.3         | 15.1 | 70.9           | 58.7 | 78.2 | 33.2  | 65.7         | 15.8 | 68.3           | 56.0 | 78.4 |
| Spain, Community of Madrid       | 100 | 64.5         | 15.8 | 68.3           | 55.2 | 76.4 | 68.6 | 64.5         | 15.5 | 68.3           | 55.3 | 76.0 | 31.4  | 64.6         | 16.6 | 68.4           | 54.6 | 77.2 |
| Spain, Extremadura               | 100 | 65.9         | 12.2 | 66.7           | 57.4 | 75.3 | 68.7 | 65.1         | 12.4 | 65.6           | 57.3 | 75.0 | 31.3  | 67.9         | 11.6 | 68.1           | 57.4 | 78.2 |
| Spain, Galicia                   | 100 | 67.5         | 12.4 | 69.6           | 60.8 | 77.0 | 73.5 | 67.6         | 12.4 | 69.8           | 60.4 | 77.3 | 26.5  | 67.3         | 12.5 | 67.9           | 61.2 | 76.0 |
| Spain, La Rioja                  | 100 | 68.2         | 11.8 | 69.2           | 59.6 | 78.2 | 54.5 | 69.3         | 11.0 | 68.5           | 59.6 | 80.0 | 45.5  | 66.8         | 13.1 | 71.4           | 59.3 | 77.4 |
| Spain, Murcia                    | 100 | 65.0         | 14.2 | 66.9           | 58.1 | 75.3 | 70.3 | 64.8         | 13.9 | 66.8           | 57.4 | 75.0 | 29.7  | 65.2         | 15.1 | 67.3           | 60.0 | 77.0 |
| Spain, Navarre *                 | 100 | 63.4         | 15.8 | 68.7           | 54.6 | 76.0 | 65.7 | 66.4         | 13.6 | 69.4           | 62.0 | 76.8 | 34.3  | 57.7         | 18.3 | 64.3           | 37.3 | 74.7 |
| Spain, Valencian region          | 100 | 66.5         | 14.5 | 70.3           | 58.4 | 77.1 | 68.0 | 66.2         | 14.8 | 70.1           | 58.7 | 77.0 | 32.0  | 67.2         | 13.8 | 70.7           | 57.7 | 77.4 |
| Sweden                           | 100 | 64.0         | 17.2 | 68.5           | 54.8 | 76.5 | 68.6 | 64.2         | 17.1 | 69.1           | 55.2 | 76.5 | 31.4  | 63.4         | 17.5 | 67.5           | 54.1 | 76.4 |
| Switzerland                      | 100 | 65.2         | 16.2 | 68.9           | 56.8 | 77.2 | 65.8 | 65.8         | 16.4 | 70.0           | 58.4 | 77.6 | 34.2  | 64.0         | 15.7 | 66.8           | 54.6 | 76.4 |
| the Netherlands                  | 100 | 63.9         | 15.8 | 67.7           | 55.2 | 75.4 | 63.9 | 64.8         | 15.5 | 68.6           | 56.7 | 76.1 | 36.1  | 62.2         | 16.2 | 65.9           | 52.9 | 74.1 |
| United Kingdom, England          | 100 | 61.0         | 16.9 | 63.5           | 51.3 | 73.8 | 64.9 | 61.6         | 16.7 | 64.0           | 52.2 | 74.3 | 35.1  | 59.9         | 17.2 | 62.6           | 50.1 | 72.9 |
| United Kingdom, Northern Ireland | 100 | 60.1         | 17.7 | 64.0           | 48.9 | 73.5 | 62.6 | 60.9         | 16.8 | 64.0           | 53.7 | 73.5 | 37.4  | 58.7         | 19.1 | 63.8           | 47.2 | 72.4 |
| United Kingdom, Scotland         | 100 | 60.0         | 17.0 | 63.0           | 51.0 | 73.0 | 62.0 | 59.0         | 17.0 | 62.0           | 50.0 | 72.0 | 38.0  | 61.0         | 17.0 | 63.0           | 52.0 | 75.0 |
| United Kingdom, Wales            | 100 | 61.5         | 17.3 | 65.4           | 51.2 | 74.4 | 65.4 | 63.5         | 17.1 | 67.9           | 53.9 | 75.7 | 34.6  | 57.7         | 17.0 | 60.6           | 47.8 | 69.3 |

Categories may not add up because of missing values or rounding off

\* Patients younger than 20 years of age are not reported

Table B.2.4  
**Incidence per million population, adjusted**  
*at day 1, adjusted for age and sex*

|                                  | All   | Men   | Women |
|----------------------------------|-------|-------|-------|
|                                  | Pmp   | Pmp   | Pmp   |
| Austria §                        | 118.2 | 160.1 | 78.2  |
| Belgium, Dutch-speaking *        | 160.0 | 201.8 | 120.1 |
| Belgium, French-speaking *       | 208.1 | 268.5 | 150.4 |
| Bosnia and Herzegovina           | 128.6 | 164.9 | 94.0  |
| Denmark                          | 116.0 | 154.4 | 79.5  |
| Estonia                          | 57.9  | 67.9  | 48.3  |
| Finland                          | 88.7  | 111.0 | 67.4  |
| France                           | 154.0 | 204.8 | 105.6 |
| Greece                           | 219.5 | 295.5 | 147.0 |
| Iceland                          | 127.4 | 145.6 | 110.1 |
| Montenegro *                     | 129.4 | 184.4 | 76.9  |
| Norway                           | 103.9 | 139.2 | 70.3  |
| Romania                          | 162.7 | 203.1 | 124.2 |
| Serbia                           | 71.3  | 93.6  | 50.1  |
| Spain, Andalusia                 | 142.9 | 183.7 | 104.0 |
| Spain, Aragon                    | 125.5 | 187.9 | 65.9  |
| Spain, Asturias                  | 135.1 | 186.0 | 86.6  |
| Spain, Basque country            | 116.9 | 166.5 | 69.6  |
| Spain, Canary Islands            | 173.0 | 239.3 | 109.8 |
| Spain, Cantabria *               | 111.6 | 167.3 | 58.5  |
| Spain, Castile and León *        | 94.6  | 127.6 | 63.2  |
| Spain, Castile-La Mancha *       | 103.4 | 135.8 | 72.5  |
| Spain, Catalonia                 | 172.1 | 233.9 | 113.2 |
| Spain, Community of Madrid       | 114.3 | 162.4 | 68.5  |
| Spain, Extremadura               | 129.0 | 178.8 | 81.5  |
| Spain, Galicia                   | 120.4 | 180.5 | 63.1  |
| Spain, La Rioja                  | 95.7  | 103.0 | 88.7  |
| Spain, Murcia                    | 157.2 | 222.9 | 94.6  |
| Spain, Navarre *                 | 104.5 | 135.4 | 75.0  |
| Spain, Valencian region          | 147.7 | 203.3 | 94.7  |
| Sweden                           | 106.5 | 143.7 | 71.1  |
| Switzerland                      | 96.1  | 126.2 | 67.5  |
| the Netherlands                  | 108.7 | 138.0 | 80.8  |
| United Kingdom, England          | 110.3 | 143.6 | 78.5  |
| United Kingdom, Northern Ireland | 115.5 | 145.6 | 86.8  |
| United Kingdom, Scotland         | 97.8  | 122.8 | 74.0  |
| United Kingdom, Wales            | 107.4 | 139.4 | 76.8  |

§ The incidence is underestimated by approximately 1% due to one hemodialysis centre not submitting data

\* Patients younger than 20 years of age are not reported

Table B.2.5  
Incidence per million population and percentages by primary renal disease, unadjusted  
at day 1

|                                    | All   |     | GN   |      | PN   |      | PKD  |      | DM     |      |        |      |      |      | HT   |      | RVD  |     | Misc |      | Unkn |      | Missing |      |
|------------------------------------|-------|-----|------|------|------|------|------|------|--------|------|--------|------|------|------|------|------|------|-----|------|------|------|------|---------|------|
|                                    |       |     |      |      |      |      |      |      | Type 1 |      | Type 2 |      | Both |      |      |      |      |     |      |      |      |      |         |      |
|                                    | Pmp   | %   | Pmp  | %    | Pmp  | %    | Pmp  | %    | Pmp    | %    | Pmp    | %    | Pmp  | %    | Pmp  | %    | Pmp  | %   | Pmp  | %    | Pmp  | %    | Pmp     | %    |
| Austria §                          | 121.9 | 100 | 11.8 | 9.7  | 3.9  | 3.2  | 6.6  | 5.4  | 5.1    | 4.1  | 25.5   | 20.9 | 30.6 | 25.1 | 21.0 | 17.2 | 2.5  | 2.0 | 29.1 | 23.9 | 16.2 | 13.3 | 0.2     | 0.2  |
| Belgium, Dutch-speaking *          | 173.7 | 100 | 15.3 | 8.8  | 6.5  | 3.7  | 6.5  | 3.7  | 5.3    | 3.0  | 30.2   | 17.4 | 35.5 | 20.4 | 18.3 | 10.6 | 6.5  | 3.7 | 69.0 | 39.7 | 16.2 | 9.3  | 0       | 0    |
| Belgium, French-speaking *         | 193.0 | 100 | 13.5 | 7.0  | 7.2  | 3.7  | 6.3  | 3.3  | 2.2    | 1.2  | 40.3   | 20.9 | 42.5 | 22.0 | 28.2 | 14.6 | 2.0  | 1.1 | 57.7 | 29.9 | 35.6 | 18.4 | 0       | 0    |
| Bosnia and Herzegovina             | 115.5 | 100 | 9.9  | 8.6  | 12.2 | 10.5 | 6.8  | 5.9  | 7.1    | 6.1  | 23.2   | 20.1 | 30.3 | 26.2 | 14.2 | 12.3 | 3.1  | 2.7 | 15.6 | 13.5 | 23.5 | 20.3 | 0       | 0    |
| Denmark                            | 120.1 | 100 | 14.9 | 12.4 | 6.5  | 5.4  | 8.2  | 6.8  | 6.3    | 5.2  | 26.5   | 22.1 | 32.8 | 27.3 | 12.4 | 10.3 | 1.0  | 0.8 | 21.2 | 17.7 | 23.1 | 19.2 | 0       | 0    |
| Estonia                            | 57.2  | 100 | 7.5  | 13.2 | 3.8  | 6.6  | 6.8  | 11.8 |        |      |        |      | 13.5 | 23.7 | 14.3 | 25.0 | 0    | 0   | 11.3 | 19.7 | 0    | 0    | 0       | 0    |
| Finland                            | 94.4  | 100 | 12.3 | 13.0 | 5.4  | 5.7  | 9.0  | 9.6  | 14.3   | 15.1 | 17.4   | 18.4 | 31.6 | 33.5 | 7.2  | 7.7  | 0.2  | 0.2 | 13.4 | 14.2 | 15.2 | 16.1 | 0       | 0    |
| France                             | 158.5 | 100 | 17.1 | 10.8 | 7.7  | 4.9  | 9.3  | 5.9  |        |      |        |      | 36.8 | 23.2 | 38.6 | 24.3 | 1.5  | 1.0 | 23.1 | 14.5 | 24.0 | 15.2 | 0.4     | 0.2  |
| Greece                             | 256.9 | 100 | 19.2 | 7.5  | 12.2 | 4.8  | 9.2  | 3.6  | 1.3    | 0.5  | 60.3   | 23.5 | 61.6 | 24.0 | 25.6 | 10.0 | 3.8  | 1.5 | 34.1 | 13.3 | 91.2 | 35.5 | 0       | 0    |
| Iceland                            | 103.7 | 100 | 16.4 | 15.8 | 2.7  | 2.6  | 5.5  | 5.3  | 2.7    | 2.6  | 10.9   | 10.5 | 13.6 | 13.2 | 32.7 | 31.6 | 2.7  | 2.6 | 24.6 | 23.7 | 5.5  | 5.3  | 0       | 0    |
| Montenegro *                       | 120.7 | 100 | 16.1 | 13.3 | 1.6  | 1.3  | 1.6  | 1.3  | 11.3   | 9.3  | 11.3   | 9.3  | 22.5 | 18.7 | 33.8 | 28.0 | 0    | 0   | 17.7 | 14.7 | 27.4 | 22.7 | 0       | 0    |
| Norway                             | 100.9 | 100 | 17.8 | 17.7 | 3.5  | 3.5  | 8.6  | 8.5  | 3.9    | 3.9  | 12.8   | 12.7 | 16.7 | 16.6 | 29.9 | 29.7 | 0.7  | 0.7 | 20.3 | 20.1 | 3.0  | 2.9  | 0.4     | 0.4  |
| Romania                            | 163.4 | 100 | 17.3 | 10.6 | 7.6  | 4.6  | 3.8  | 2.3  |        |      |        |      | 20.7 | 12.6 | 10.6 | 6.5  | 0.8  | 0.5 | 29.8 | 18.3 | 72.8 | 44.6 | 0       | 0    |
| Serbia                             | 76.3  | 100 | 8.2  | 10.8 | 6.1  | 8.0  | 3.5  | 4.6  |        |      |        |      | 22.2 | 29.1 | 17.9 | 23.4 | 1.0  | 1.3 | 12.2 | 16.0 | 5.2  | 6.8  | 0       | 0    |
| Spain, Andalusia                   | 139.6 | 100 | 17.5 | 12.6 | 7.7  | 5.5  | 7.8  | 5.6  |        |      |        |      | 37.2 | 26.7 | 13.3 | 9.5  | 1.8  | 1.3 | 27.4 | 19.7 | 26.9 | 19.2 | 0       | 0    |
| Spain, Aragon                      | 136.8 | 100 | 27.8 | 20.3 | 6.8  | 4.9  | 4.5  | 3.3  | 3.0    | 2.2  | 31.6   | 23.1 | 34.6 | 25.3 | 16.5 | 12.1 | 0.8  | 0.5 | 15.0 | 11.0 | 30.8 | 22.5 | 0       | 0    |
| Spain, Asturias                    | 167.3 | 100 | 21.7 | 12.9 | 8.9  | 5.3  | 9.8  | 5.9  | 3.9    | 2.4  | 45.3   | 27.1 | 49.2 | 29.4 | 38.4 | 22.9 | 0    | 0   | 22.6 | 13.5 | 16.7 | 10.0 | 0       | 0    |
| Spain, Basque country              | 131.7 | 100 | 15.5 | 11.8 | 3.7  | 2.8  | 12.8 | 9.7  | 5.0    | 3.8  | 28.3   | 21.5 | 33.4 | 25.3 | 19.7 | 14.9 | 1.8  | 1.4 | 23.3 | 17.7 | 21.5 | 16.3 | 0       | 0    |
| Spain, Canary Islands              | 170.5 | 100 | 24.5 | 14.4 | 4.5  | 2.6  | 8.5  | 5.0  | 4.5    | 2.6  | 51.8   | 30.4 | 56.2 | 33.0 | 15.2 | 8.9  | 0.9  | 0.5 | 37.9 | 22.3 | 22.8 | 13.4 | 0       | 0    |
| Spain, Cantabria *                 | 125.2 | 100 | 20.6 | 16.4 | 5.1  | 4.1  | 12.0 | 9.6  | 1.7    | 1.4  | 34.3   | 27.4 | 36.0 | 28.8 | 13.7 | 11.0 | 1.7  | 1.4 | 18.9 | 15.1 | 10.3 | 8.2  | 6.9     | 5.5  |
| Spain, Castile and León ‡          | 119.0 | 100 | 17.5 | 14.7 | 5.4  | 4.6  | 9.6  | 8.1  | 4.2    | 3.5  | 25.1   | 21.1 | 29.2 | 24.6 | 15.0 | 12.6 | 0    | 0   | 23.8 | 20.0 | 18.4 | 15.4 | 0       | 0    |
| Spain, Castile-La Mancha *         | 105.0 | 100 | 11.2 | 10.7 | 12.2 | 11.6 | 7.8  | 7.4  |        |      |        |      | 30.3 | 28.8 | 5.4  | 5.1  | 3.9  | 3.7 | 15.6 | 14.9 | 18.6 | 17.7 | 0       | 0    |
| Spain, Catalonia                   | 171.7 | 100 | 15.0 | 8.8  | 6.9  | 4.0  | 8.7  | 5.1  | 1.7    | 1.0  | 30.5   | 17.7 | 32.8 | 19.1 | 7.7  | 4.5  | 4.0  | 2.3 | 18.6 | 10.9 | 33.7 | 19.6 | 44.2    | 25.7 |
| Spain, Community of Madrid         | 109.9 | 100 | 15.8 | 14.4 | 3.5  | 3.2  | 8.8  | 8.1  | 1.8    | 1.6  | 27.0   | 24.6 | 28.8 | 26.2 | 11.9 | 10.9 | 1.8  | 1.6 | 33.0 | 30.1 | 6.2  | 5.6  | 0       | 0    |
| Spain, Extremadura                 | 141.0 | 100 | 18.8 | 13.3 | 8.5  | 6.0  | 8.5  | 6.0  |        |      |        |      | 45.1 | 32.0 | 3.8  | 2.7  | 4.7  | 3.3 | 10.3 | 7.3  | 41.4 | 29.3 | 0       | 0    |
| Spain, Galicia                     | 145.6 | 100 | 13.3 | 9.2  | 4.4  | 3.1  | 11.1 | 7.6  | 2.6    | 1.8  | 37.8   | 26.0 | 40.4 | 27.7 | 14.8 | 10.2 | 0.7  | 0.5 | 24.1 | 16.5 | 36.7 | 25.2 | 0       | 0    |
| Spain, La Rioja                    | 104.4 | 100 | 22.1 | 21.2 | 6.3  | 6.1  | 3.2  | 3.0  | 0      | 0    | 19.0   | 18.2 | 19.0 | 18.2 | 15.8 | 15.2 | 0    | 0   | 25.3 | 24.2 | 12.7 | 12.1 | 0       | 0    |
| Spain, Murcia                      | 140.3 | 100 | 18.5 | 13.2 | 7.3  | 5.2  | 10.6 | 7.5  | 6.0    | 4.2  | 26.5   | 18.9 | 32.4 | 23.1 | 11.9 | 8.5  | 1.3  | 0.9 | 33.1 | 23.6 | 25.1 | 17.9 | 0       | 0    |
| Spain, Navarre *                   | 106.5 | 100 | 13.7 | 12.9 | 1.5  | 1.4  | 4.6  | 4.3  | 7.6    | 7.1  | 32.0   | 30.0 | 39.6 | 37.1 | 9.1  | 8.6  | 0    | 0   | 19.8 | 18.6 | 18.3 | 17.1 | 0       | 0    |
| Spain, Valencian region            | 152.8 | 100 | 14.2 | 9.3  | 5.7  | 3.8  | 9.1  | 6.0  |        |      |        |      | 35.0 | 22.9 | 28.7 | 18.8 | 0.6  | 0.4 | 31.2 | 20.4 | 28.3 | 18.5 | 0       | 0    |
| Sweden ‡                           | 109.8 | 100 | 16.6 | 15.1 | 3.6  | 3.3  | 7.4  | 6.8  | 5.7    | 5.2  | 21.4   | 19.5 | 27.1 | 24.7 | 20.3 | 18.5 | 1.3  | 1.1 | 23.0 | 20.9 | 10.5 | 9.6  | 0       | 0    |
| Switzerland                        | 97.9  | 100 | 12.0 | 12.3 | 1.4  | 1.4  | 6.4  | 6.5  | 2.9    | 3.0  | 15.5   | 15.8 | 18.4 | 18.8 | 20.5 | 20.9 | 3.4  | 3.4 | 27.2 | 27.8 | 8.7  | 8.9  | 0       | 0    |
| the Netherlands                    | 113.5 | 100 | 11.2 | 9.8  | 3.2  | 2.8  | 5.2  | 4.6  | 3.4    | 3.0  | 20.4   | 17.9 | 23.7 | 20.9 | 16.7 | 14.7 | 11.1 | 9.8 | 21.7 | 19.1 | 12.1 | 10.6 | 8.6     | 7.6  |
| United Kingdom, England #          | 107.8 | 100 | 10.9 | 10.1 | 5.5  | 5.1  | 5.8  | 5.4  |        |      |        |      | 28.6 | 26.5 | 7.2  | 6.6  | 1.2  | 1.1 | 19.4 | 18.0 | 14.1 | 13.1 | 15.2    | 14.1 |
| United Kingdom, Northern Ireland # | 108.7 | 100 | 10.6 | 9.7  | 7.4  | 6.8  | 7.9  | 7.3  |        |      |        |      | 20.6 | 18.9 | 3.2  | 2.9  | 0    | 0   | 29.0 | 26.7 | 18.5 | 17.0 | 11.6    | 10.7 |
| United Kingdom, Scotland           | 99.2  | 100 | 15.4 | 15.5 | 4.6  | 4.6  | 7.7  | 7.7  |        |      |        |      | 29.5 | 29.7 | 2.7  | 2.8  | 1.6  | 1.7 | 25.2 | 25.5 | 12.4 | 12.5 | 0       | 0    |
| United Kingdom, Wales #            | 112.3 | 100 | 19.2 | 17.1 | 6.6  | 5.9  | 6.9  | 6.2  |        |      |        |      | 29.0 | 25.8 | 4.1  | 3.7  |      |     | 33.1 | 29.5 | 11.7 | 10.4 |         |      |

Abbreviations used: GN: glomerulonephritis/sclerosis; PN: pyelonephritis; PKD: polycystic kidneys, adult type; DM: diabetes mellitus; HT: hypertension; RVD: renal vascular disease; Misc: miscellaneous; Unkn: unknown  
Categories may not add up because of rounding off or a limited number of cases (<10%) with diabetes mellitus type unknown; When cells are left empty, (complete) data are unavailable

§ The incidence is underestimated by approximately 1% due to one hemodialysis centre not submitting data

\* Patients younger than 20 years of age are not reported

‡ Mapping the 2018 Primary Renal Disease (PRD) codes to the old PRD codes results in a different distribution of PRD groups

# Values based on 1 to 5 patients are suppressed

Table B.2.6  
**Incidence per million population by primary renal disease, adjusted**  
*at day 1, adjusted for age and sex*

|                                    | All   | GN   | PN   | PKD  | DM     |        |      | HT   | RVD  | Misc | Unkn | Missing |
|------------------------------------|-------|------|------|------|--------|--------|------|------|------|------|------|---------|
|                                    | Pmp   | Pmp  | Pmp  | Pmp  | Type 1 | Type 2 | Both | Pmp  | Pmp  | Pmp  | Pmp  | Pmp     |
|                                    |       |      |      |      | Pmp    | Pmp    | Pmp  |      |      |      |      |         |
| Austria §                          | 118.2 | 11.6 | 3.7  | 6.4  | 5.0    | 24.7   | 29.7 | 20.3 | 2.4  | 28.3 | 15.6 | 0.2     |
| Belgium, Dutch-speaking *          | 160.0 | 14.7 | 6.1  | 6.4  | 5.1    | 27.7   | 32.8 | 16.3 | 5.9  | 62.9 | 14.9 | 0       |
| Belgium, French-speaking *         | 208.1 | 14.6 | 7.6  | 6.7  | 2.3    | 43.5   | 45.8 | 30.7 | 2.2  | 61.7 | 38.8 | 0       |
| Bosnia and Herzegovina             | 128.6 | 10.2 | 14.5 | 6.6  | 7.7    | 26.2   | 33.9 | 15.3 | 3.5  | 17.8 | 26.8 | 0       |
| Denmark                            | 116.0 | 15.2 | 6.0  | 8.0  | 6.5    | 25.0   | 31.5 | 12.0 | 0.9  | 20.5 | 21.9 | 0       |
| Estonia                            | 57.9  | 8.0  | 4.1  | 6.5  |        |        | 13.8 | 14.2 | 0    | 11.3 | 0    | 0       |
| Finland                            | 88.7  | 12.2 | 5.0  | 8.6  | 14.5   | 15.4   | 30.0 | 6.4  | 0.1  | 12.6 | 13.8 | 0       |
| France                             | 154.0 | 17.3 | 7.5  | 9.6  |        |        | 35.8 | 36.4 | 1.5  | 22.8 | 22.8 | 0.4     |
| Greece                             | 219.5 | 17.8 | 10.6 | 8.4  | 1.3    | 51.6   | 52.9 | 21.6 | 3.1  | 29.2 | 75.9 | 0       |
| Iceland                            | 127.4 | 18.6 | 3.0  | 6.5  | 3.1    | 12.7   | 15.8 | 44.4 | 2.9  | 30.2 | 6.2  | 0       |
| Montenegro *                       | 129.4 | 18.6 | 2.1  | 1.5  | 11.5   | 12.2   | 23.7 | 36.3 | 0    | 18.4 | 28.7 | 0       |
| Norway                             | 103.9 | 18.1 | 3.5  | 9.0  | 4.1    | 13.4   | 17.5 | 30.7 | 0.9  | 20.7 | 3.1  | 0.4     |
| Romania                            | 162.7 | 17.2 | 7.7  | 3.7  |        |        | 20.5 | 10.6 | 0.7  | 29.9 | 72.4 | 0       |
| Serbia                             | 71.3  | 7.9  | 5.8  | 3.3  |        |        | 20.6 | 16.5 | 0.9  | 11.6 | 4.8  | 0       |
| Spain, Andalusia                   | 142.9 | 17.6 | 7.8  | 7.6  |        |        | 38.1 | 13.9 | 1.9  | 28.3 | 27.7 | 0       |
| Spain, Aragon                      | 125.5 | 26.1 | 5.9  | 3.9  | 2.9    | 28.7   | 31.6 | 14.5 | 0.6  | 14.2 | 28.4 | 0       |
| Spain, Asturias                    | 135.1 | 19.8 | 7.6  | 7.8  | 3.1    | 35.0   | 38.1 | 28.4 | 0    | 20.6 | 12.9 | 0       |
| Spain, Basque country              | 116.9 | 14.6 | 3.6  | 11.4 | 4.8    | 23.9   | 28.6 | 17.4 | 1.5  | 20.9 | 19.0 | 0       |
| Spain, Canary Islands              | 173.0 | 24.5 | 4.4  | 7.4  | 4.1    | 53.4   | 57.5 | 15.6 | 1.0  | 38.9 | 23.6 | 0       |
| Spain, Cantabria *                 | 111.6 | 19.2 | 4.6  | 11.3 | 1.8    | 30.0   | 31.8 | 11.8 | 1.6  | 15.8 | 9.0  | 6.4     |
| Spain, Castile and León * ‡        | 94.6  | 14.4 | 4.3  | 8.3  | 3.7    | 19.5   | 23.2 | 11.1 | 0    | 19.4 | 14.1 | 0       |
| Spain, Castile-La Mancha *         | 103.4 | 10.7 | 12.4 | 7.6  |        |        | 29.8 | 5.3  | 3.5  | 15.8 | 18.3 | 0       |
| Spain, Catalonia                   | 172.1 | 14.9 | 6.8  | 8.5  | 1.6    | 31.1   | 33.3 | 7.6  | 4.0  | 18.7 | 33.9 | 44.3    |
| Spain, Community of Madrid         | 114.3 | 16.3 | 3.7  | 8.9  | 1.8    | 28.4   | 30.2 | 12.4 | 1.9  | 34.5 | 6.4  | 0       |
| Spain, Extremadura                 | 129.0 | 16.3 | 7.8  | 8.0  |        |        | 41.1 | 3.6  | 4.5  | 9.7  | 37.9 | 0       |
| Spain, Galicia                     | 120.4 | 11.8 | 3.7  | 9.6  | 2.5    | 30.9   | 33.4 | 11.8 | 0.6  | 20.6 | 28.9 | 0       |
| Spain, La Rioja                    | 95.7  | 20.2 | 5.7  | 3.0  | 0      | 17.5   | 17.5 | 14.8 | 0    | 22.2 | 12.3 | 0       |
| Spain, Murcia                      | 157.2 | 20.0 | 8.2  | 10.6 | 5.7    | 30.6   | 36.2 | 14.2 | 1.6  | 37.2 | 29.1 | 0       |
| Spain, Navarre *                   | 104.5 | 13.8 | 1.6  | 4.2  | 7.8    | 30.5   | 38.3 | 8.7  | 0    | 20.2 | 17.7 | 0       |
| Spain, Valencian region            | 147.7 | 13.9 | 5.7  | 8.5  |        |        | 33.9 | 27.5 | 0.6  | 30.4 | 27.3 | 0       |
| Sweden ‡                           | 106.5 | 16.5 | 3.4  | 7.7  | 5.9    | 20.6   | 26.5 | 19.1 | 1.2  | 22.1 | 10.0 | 0       |
| Switzerland                        | 96.1  | 11.8 | 1.4  | 6.3  | 2.8    | 15.2   | 18.0 | 19.9 | 3.2  | 26.9 | 8.5  | 0       |
| the Netherlands                    | 108.7 | 10.8 | 3.0  | 5.1  | 3.4    | 19.3   | 22.6 | 16.2 | 10.3 | 20.6 | 11.8 | 8.4     |
| United Kingdom, England #          | 110.3 | 11.2 | 5.5  | 6.1  |        |        | 29.5 | 7.4  | 1.2  | 19.7 | 14.3 | 15.3    |
| United Kingdom, Northern Ireland # | 115.5 | 11.5 | 7.9  | 8.4  |        |        | 21.9 | 3.4  | 0    | 30.9 | 19.6 | 11.9    |
| United Kingdom, Scotland           | 97.8  | 15.2 | 4.5  | 7.7  |        |        | 28.9 | 2.8  | 1.6  | 24.9 | 12.2 | 0       |
| United Kingdom, Wales #            | 107.4 | 18.9 | 5.9  | 7.1  |        |        | 28.3 | 3.9  |      | 30.3 | 11.5 |         |

Abbreviations used: GN: glomerulonephritis/sclerosis; PN: pyelonephritis; PKD: polycystic kidneys, adult type; DM: diabetes mellitus; HT: hypertension; RVD: renal vascular disease; Misc: miscellaneous; Unkn: unknown  
 Categories may not add up because of rounding off or a limited number of cases (<10%) with diabetes mellitus type unknown; When cells are left empty, (complete) data are unavailable

§ The incidence is underestimated by approximately 1% due to one hemodialysis centre not submitting data

\* Patients younger than 20 years of age are not reported

‡ Mapping the 2018 Primary Renal Disease (PRD) codes to the old PRD codes results in a different distribution of PRD groups

# Values based on 1 to 5 patients are suppressed

Table B.2.7  
Incident counts by treatment modality  
at day 1

|                                    | All   | Haemodialysis      |         |              |    |      |                 | Peritoneal dialysis |      |              |          | Preemptive kidney transplant |                |              |          | Unkn | Missing |
|------------------------------------|-------|--------------------|---------|--------------|----|------|-----------------|---------------------|------|--------------|----------|------------------------------|----------------|--------------|----------|------|---------|
|                                    |       | HD hospital/centre | HD home | HD type Unkn | HF | HDF  | Total HD/HF/HDF | APD                 | CAPD | PD type Unkn | Total PD | Living donor                 | Deceased donor | Tx type Unkn | Total Tx |      |         |
|                                    |       | N                  | N       | N            | N  | N    | N               | N                   | N    | N            | N        | N                            | N              | N            | N        |      |         |
| Austria §                          | 1085  | 820                | 0       | 0            | 10 | 132  | 962             | 22                  | 64   | 2            | 88       | 15                           | 20             | 0            | 35       | 0    | 0       |
| Belgium, Dutch-speaking *          | 1156  | 729                | 0       | 0            | 0  | 314  | 1043            | 45                  | 54   | 0            | 99       | 6                            | 8              | 0            | 14       | 0    | 0       |
| Belgium, French-speaking *         | 944   | 505                | 5       | 0            | 68 | 282  | 860             | 29                  | 47   | 0            | 76       | 3                            | 5              | 0            | 8        | 0    | 0       |
| Bosnia and Herzegovina             | 408   | 361                | 0       | 0            | 0  | 39   | 400             | 0                   | 8    | 0            | 8        | 0                            | 0              | 0            | 0        | 0    | 0       |
| Denmark                            | 707   | 408                | 0       | 0            |    |      | 408             | 94                  | 131  | 7            | 232      | 27                           | 40             | 0            | 67       | 0    | 0       |
| Estonia                            | 76    | 59                 | 0       | 0            | 0  | 0    | 59              | 15                  | 0    | 0            | 15       | 0                            | 2              | 0            | 2        | 0    | 0       |
| Finland                            | 522   | 364                | 6       | 0            | 0  | 0    | 370             | 33                  | 97   | 0            | 130      | 11                           | 11             | 0            | 22       | 0    | 0       |
| France                             | 10696 | 7292               | 10      | 9            | 32 | 1895 | 9238            | 199                 | 882  | 2            | 1083     | 146                          | 229            | 0            | 375      | 0    | 0       |
| Greece                             | 2749  | 2590               | 0       | 0            | 0  | 16   | 2606            | 23                  | 99   | 0            | 122      | 21                           | 0              | 0            | 21       | 0    | 0       |
| Iceland                            | 38    | 27                 | 0       | 0            |    |      | 27              | 0                   | 8    | 0            | 8        | 1                            | 2              | 0            | 3        | 0    | 0       |
| Montenegro *                       | 75    | 75                 | 0       | 0            | 0  | 0    | 75              | 0                   | 0    | 0            | 0        | 0                            | 0              | 0            | 0        | 0    | 0       |
| Norway                             | 543   | 343                | 1       | 0            |    |      | 344             |                     |      | 145          | 145      | 24                           | 30             | 0            | 54       | 0    | 0       |
| Romania //                         | 2990  | 2929               | 0       | 0            | 0  | 5    | 2934            | 4                   | 44   | 0            | 48       | 7                            | 1              | 0            | 8        | 0    | 0       |
| Serbia                             | 474   | 409                | 0       | 0            | 0  | 10   | 419             | 3                   | 52   | 0            | 55       | 0                            | 0              | 0            | 0        | 0    | 0       |
| Spain, Andalusia                   | 1185  | 977                | 3       | 0            |    |      | 980             |                     |      | 152          | 152      | 18                           | 35             | 0            | 53       | 0    | 0       |
| Spain, Aragon                      | 182   | 142                | 0       | 0            |    | 6    | 148             | 1                   | 27   | 0            | 28       | 4                            | 2              | 0            | 6        | 0    | 0       |
| Spain, Asturias                    | 170   | 134                | 0       | 0            |    | 0    | 134             | 6                   | 25   | 0            | 31       | 1                            | 4              | 0            | 5        | 0    | 0       |
| Spain, Basque country              | 288   | 203                | 2       | 0            |    |      | 205             | 2                   | 65   | 0            | 67       | 10                           | 6              | 0            | 16       | 0    | 0       |
| Spain, Canary Islands              | 382   | 290                | 0       | 0            | 0  | 0    | 290             | 0                   | 0    | 82           | 82       | 2                            | 8              | 0            | 10       | 0    | 0       |
| Spain, Cantabria *                 | 73    | 56                 | 0       | 0            |    |      | 56              | 1                   | 9    | 0            | 10       | 0                            | 7              | 0            | 7        | 0    | 0       |
| Spain, Castile and León *          | 285   | 234                | 0       | 0            |    |      | 234             | 15                  | 27   | 0            | 42       | 7                            | 2              | 0            | 9        | 0    | 0       |
| Spain, Castile-La Mancha *         | 215   | 170                | 0       | 0            |    |      | 170             | 3                   | 40   | 0            | 43       | 0                            | 2              | 0            | 2        | 0    | 0       |
| Spain, Catalonia                   | 1336  | 836                | 3       | 0            |    | 237  | 1076            | 22                  | 147  | 0            | 169      | 50                           | 41             | 0            | 91       | 0    | 0       |
| Spain, Community of Madrid         | 745   | 593                | 2       | 0            |    |      | 595             | 40                  | 85   | 0            | 125      | 9                            | 16             | 0            | 25       | 0    | 0       |
| Spain, Extremadura                 | 150   | 132                | 0       | 0            |    |      | 132             | 10                  | 7    | 0            | 17       | 0                            | 1              | 0            | 1        | 0    | 0       |
| Spain, Galicia                     | 393   | 301                | 4       | 0            | 0  | 0    | 305             | 4                   | 76   | 0            | 80       | 7                            | 1              | 0            | 8        | 0    | 0       |
| Spain, La Rioja                    | 33    | 22                 | 0       | 0            | 0  | 0    | 22              | 0                   | 11   | 0            | 11       | 0                            | 0              | 0            | 0        | 0    | 0       |
| Spain, Murcia                      | 212   | 179                | 0       | 0            | 0  | 0    | 179             | 1                   | 31   | 0            | 32       | 1                            | 0              | 0            | 1        | 0    | 0       |
| Spain, Navarre *                   | 70    | 46                 | 2       | 0            |    |      | 48              | 18                  | 3    | 0            | 21       | 0                            | 1              | 0            | 1        | 0    | 0       |
| Spain, Valencian region            | 773   | 600                | 7       | 0            |    |      | 607             | 10                  | 113  | 0            | 123      | 6                            | 37             | 0            | 43       | 0    | 0       |
| Sweden                             | 1137  | 663                | 1       | 0            |    |      | 664             |                     |      | 390          | 390      | 38                           | 45             | 0            | 83       | 0    | 0       |
| Switzerland                        | 846   | 671                | 5       | 17           | 3  | 0    | 696             | 26                  | 81   | 2            | 109      | 26                           | 15             | 0            | 41       | 0    | 0       |
| the Netherlands ‡                  | 1861  | 1278               | 2       | 0            |    | 18   | 1298            | 113                 | 233  | 0            | 346      | 182                          | 35             | 0            | 217      | 0    | 0       |
| United Kingdom, England #          | 6097  | 3633               | 13      |              | 19 | 682  | 4348            | 570                 | 817  | 21           | 1408     | 139                          | 193            | 9            | 341      | 0    | 0       |
| United Kingdom, Northern Ireland # | 206   | 146                |         | 0            |    | 0    | 148             | 11                  |      | 0            | 16       | 11                           | 31             | 0            | 42       | 0    | 0       |
| United Kingdom, Scotland           | 542   | 395                | 0       | 0            |    |      | 395             | 0                   | 0    | 0            | 102      | 0                            | 0              | 0            | 45       | 0    | 0       |
| United Kingdom, Wales #            | 356   | 236                |         | 0            |    | 24   | 262             | 23                  | 55   | 0            | 78       | 7                            | 9              | 0            | 16       | 0    | 0       |

Abbreviations used: HD: haemodialysis; Unkn: unknown; HF: haemofiltration; HDF: haemodiafiltration; APD: automated peritoneal dialysis; CAPD: continuous ambulatory peritoneal dialysis; PD: peritoneal dialysis; Tx: transplant

When cells are left empty, (complete) data are unavailable

§ The incidence is underestimated by approximately 1% due to an estimated 1.2% underestimation of the incidence of haemodialysis

\* Patients younger than 20 years of age are not reported

// The incidence of pre-emptive transplantation is underestimated by approximately 30%

‡ The incidence is underestimated by approximately 7%

# Values based on 1 to 5 patients are suppressed



Table B.2.8  
Incidence per million population by treatment modality, unadjusted  
at day 1

|                                    | All   | Haemodialysis      |         |              |      |      |                 | Peritoneal dialysis |      |              |          | Preemptive kidney transplant |                |              |          | Unkn | Missing |
|------------------------------------|-------|--------------------|---------|--------------|------|------|-----------------|---------------------|------|--------------|----------|------------------------------|----------------|--------------|----------|------|---------|
|                                    |       | HD hospital/centre | HD home | HD type Unkn | HF   | HDF  | Total HD/HF/HDF | APD                 | CAPD | PD type Unkn | Total PD | Living donor                 | Deceased donor | Tx type Unkn | Total Tx |      |         |
|                                    |       | Pmp                | Pmp     | Pmp          | Pmp  | Pmp  | Pmp             | Pmp                 | Pmp  | Pmp          | Pmp      | Pmp                          | Pmp            | Pmp          | Pmp      |      |         |
| Austria §                          | 121.9 | 92.1               | 0       | 0            | 1.1  | 14.8 | 108.1           | 2.5                 | 7.2  | 0.2          | 9.9      | 1.7                          | 2.2            | 0            | 3.9      | 0    | 0       |
| Belgium, Dutch-speaking *          | 173.7 | 109.6              | 0       | 0            | 0    | 47.2 | 156.7           | 6.8                 | 8.1  | 0            | 14.9     | 0.9                          | 1.2            | 0            | 2.1      | 0    | 0       |
| Belgium, French-speaking *         | 193.0 | 103.3              | 1.0     | 0            | 13.9 | 57.7 | 175.9           | 5.9                 | 9.6  | 0            | 15.5     | 0.6                          | 1.0            | 0            | 1.6      | 0    | 0       |
| Bosnia and Herzegovina             | 115.5 | 102.2              | 0       | 0            | 0    | 11.0 | 113.3           | 0                   | 2.3  | 0            | 2.3      | 0                            | 0              | 0            | 0        | 0    | 0       |
| Denmark                            | 120.1 | 69.3               | 0       | 0            |      |      | 69.3            | 16.0                | 22.2 | 1.2          | 39.4     | 4.6                          | 6.8            | 0            | 11.4     | 0    | 0       |
| Estonia                            | 57.2  | 44.4               | 0       | 0            | 0    | 0    | 44.4            | 11.3                | 0    | 0            | 11.3     | 0                            | 1.5            | 0            | 1.5      | 0    | 0       |
| Finland                            | 94.4  | 65.8               | 1.1     | 0            | 0    | 0    | 66.9            | 6.0                 | 17.5 | 0            | 23.5     | 2.0                          | 2.0            | 0            | 4.0      | 0    | 0       |
| France                             | 158.5 | 108.0              | 0.1     | 0.1          | 0.5  | 28.1 | 136.9           | 2.9                 | 13.1 | 0            | 16.0     | 2.2                          | 3.4            | 0            | 5.6      | 0    | 0       |
| Greece                             | 256.9 | 242.1              | 0       | 0            | 0    | 1.5  | 243.6           | 2.1                 | 9.3  | 0            | 11.4     | 2.0                          | 0              | 0            | 2.0      | 0    | 0       |
| Iceland                            | 103.7 | 73.7               | 0       | 0            |      |      | 73.7            | 0                   | 21.8 | 0            | 21.8     | 2.7                          | 5.5            | 0            | 8.2      | 0    | 0       |
| Montenegro *                       | 120.7 | 120.7              | 0       | 0            | 0    | 0    | 120.7           | 0                   | 0    | 0            | 0        | 0                            | 0              | 0            | 0        | 0    | 0       |
| Norway                             | 100.9 | 63.8               | 0.2     | 0            |      |      | 63.9            |                     |      | 27.0         | 27.0     | 4.5                          | 5.6            | 0            | 10.0     | 0    | 0       |
| Romania //                         | 163.4 | 160.0              | 0       | 0            | 0    | 0.3  | 160.3           | 0.2                 | 2.4  | 0            | 2.6      | 0.4                          | 0.1            | 0            | 0.4      | 0    | 0       |
| Serbia                             | 76.3  | 65.9               | 0       | 0            | 0    | 1.6  | 67.5            | 0.5                 | 8.4  | 0            | 8.9      | 0                            | 0              | 0            | 0        | 0    | 0       |
| Spain, Andalusia                   | 139.6 | 115.1              | 0.4     | 0            |      |      | 115.4           |                     |      | 17.9         | 17.9     | 2.1                          | 4.1            | 0            | 6.2      | 0    | 0       |
| Spain, Aragon                      | 136.8 | 106.7              | 0       | 0            |      | 4.5  | 111.2           | 0.8                 | 20.3 | 0            | 21.0     | 3.0                          | 1.5            | 0            | 4.5      | 0    | 0       |
| Spain, Asturias                    | 167.3 | 131.9              | 0       | 0            |      | 0    | 131.9           | 5.9                 | 24.6 | 0            | 30.5     | 1.0                          | 3.9            | 0            | 4.9      | 0    | 0       |
| Spain, Basque country              | 131.7 | 92.8               | 0.9     | 0            |      |      | 93.7            | 0.9                 | 29.7 | 0            | 30.6     | 4.6                          | 2.7            | 0            | 7.3      | 0    | 0       |
| Spain, Canary Islands              | 170.5 | 129.4              | 0       | 0            | 0    | 0    | 129.4           | 0                   | 0    | 36.6         | 36.6     | 0.9                          | 3.6            | 0            | 4.5      | 0    | 0       |
| Spain, Cantabria *                 | 125.2 | 96.1               | 0       | 0            |      |      | 96.1            | 1.7                 | 15.4 | 0            | 17.2     | 0                            | 12.0           | 0            | 12.0     | 0    | 0       |
| Spain, Castile and León *          | 119.0 | 97.7               | 0       | 0            |      |      | 97.7            | 6.3                 | 11.3 | 0            | 17.5     | 2.9                          | 0.8            | 0            | 3.8      | 0    | 0       |
| Spain, Castile-La Mancha *         | 105.0 | 83.0               | 0       | 0            |      |      | 83.0            | 1.5                 | 19.5 | 0            | 21.0     | 0                            | 1.0            | 0            | 1.0      | 0    | 0       |
| Spain, Catalonia                   | 171.7 | 107.4              | 0.4     | 0            |      | 30.5 | 138.3           | 2.8                 | 18.9 | 0            | 21.7     | 6.4                          | 5.3            | 0            | 11.7     | 0    | 0       |
| Spain, Community of Madrid         | 109.9 | 87.5               | 0.3     | 0            |      |      | 87.8            | 5.9                 | 12.5 | 0            | 18.4     | 1.3                          | 2.4            | 0            | 3.7      | 0    | 0       |
| Spain, Extremadura                 | 141.0 | 124.1              | 0       | 0            |      |      | 124.1           | 9.4                 | 6.6  | 0            | 16.0     | 0                            | 0.9            | 0            | 0.9      | 0    | 0       |
| Spain, Galicia                     | 145.6 | 111.5              | 1.5     | 0            | 0    | 0    | 113.0           | 1.5                 | 28.2 | 0            | 29.6     | 2.6                          | 0.4            | 0            | 3.0      | 0    | 0       |
| Spain, La Rioja                    | 104.4 | 69.6               | 0       | 0            | 0    | 0    | 69.6            | 0                   | 34.8 | 0            | 34.8     | 0                            | 0              | 0            | 0        | 0    | 0       |
| Spain, Murcia                      | 140.3 | 118.4              | 0       | 0            | 0    | 0    | 118.4           | 0.7                 | 20.5 | 0            | 21.2     | 0.7                          | 0              | 0            | 0.7      | 0    | 0       |
| Spain, Navarre *                   | 106.5 | 70.0               | 3.0     | 0            |      |      | 73.1            | 27.4                | 4.6  | 0            | 32.0     | 0                            | 1.5            | 0            | 1.5      | 0    | 0       |
| Spain, Valencian region            | 152.8 | 118.6              | 1.4     | 0            |      |      | 120.0           | 2.0                 | 22.3 | 0            | 24.3     | 1.2                          | 7.3            | 0            | 8.5      | 0    | 0       |
| Sweden                             | 109.8 | 64.0               | 0.1     | 0            |      |      | 64.1            |                     |      | 37.7         | 37.7     | 3.7                          | 4.3            | 0            | 8.0      | 0    | 0       |
| Switzerland                        | 97.9  | 77.7               | 0.6     | 2.0          | 0.3  | 0    | 80.6            | 3.0                 | 9.4  | 0.2          | 12.6     | 3.0                          | 1.7            | 0            | 4.7      | 0    | 0       |
| the Netherlands                    | 113.5 | 78.0               | 0.1     | 0            |      | 1.1  | 79.2            | 6.9                 | 14.2 | 0            | 21.1     | 11.1                         | 2.1            | 0            | 13.2     | 0    | 0       |
| United Kingdom, England #          | 107.8 | 64.2               | 0.2     |              | 0.3  | 12.1 | 76.9            | 10.1                | 14.4 | 0.4          | 24.9     | 2.5                          | 3.4            | 0.2          | 6.0      | 0    | 0       |
| United Kingdom, Northern Ireland # | 108.7 | 77.0               |         | 0            |      | 0    | 78.1            | 5.8                 |      | 0            | 8.4      | 5.8                          | 16.4           | 0            | 22.2     | 0    | 0       |
| United Kingdom, Scotland           | 99.2  | 72.3               | 0       | 0            |      |      | 72.3            | 0                   | 0    | 0            | 18.7     | 0                            | 0              | 0            | 8.2      | 0    | 0       |
| United Kingdom, Wales #            | 112.3 | 74.5               |         | 0            |      | 7.6  | 82.7            | 7.3                 | 17.4 | 0            | 24.6     | 2.2                          | 2.8            | 0            | 5.0      | 0    | 0       |

Abbreviations used: HD: haemodialysis; Unkn: unknown; HF: haemofiltration; HDF: haemodiafiltration; APD: automated peritoneal dialysis; CAPD: continuous ambulatory peritoneal dialysis; PD: peritoneal dialysis; Tx: transplant  
Categories may not add up because of rounding off; When cells are left empty, (complete) data are unavailable

§ The incidence is underestimated by approximately 1% due to an estimated 1.2% underestimation of the incidence of haemodialysis

\* Patients younger than 20 years of age are not reported

// The incidence of pre-emptive transplantation is underestimated by approximately 30%

# Values based on 1 to 5 patients are suppressed

Table B.2.9  
**Incidence per million population by treatment modality, adjusted**  
*at day 1, adjusted for age and sex*

|                                    | All   | Haemodialysis      |         |              |      |      |                 | Peritoneal dialysis |      |              |          | Preemptive kidney transplant |                |              |          | Unkn | Missing |
|------------------------------------|-------|--------------------|---------|--------------|------|------|-----------------|---------------------|------|--------------|----------|------------------------------|----------------|--------------|----------|------|---------|
|                                    |       | HD hospital/centre | HD home | HD type Unkn | HF   | HDF  | Total HD/HF/HDF | APD                 | CAPD | PD type Unkn | Total PD | Living donor                 | Deceased donor | Tx type Unkn | Total Tx |      |         |
|                                    |       | Pmp                | Pmp     | Pmp          | Pmp  | Pmp  | Pmp             | Pmp                 | Pmp  | Pmp          | Pmp      | Pmp                          | Pmp            | Pmp          | Pmp      |      |         |
| Austria §                          | 118.2 | 89.0               | 0       | 0            | 1.1  | 14.5 | 104.6           | 2.5                 | 7.0  | 0.2          | 9.6      | 1.7                          | 2.3            | 0            | 3.9      | 0    | 0       |
| Belgium, Dutch-speaking *          | 160.0 | 100.5              | 0       | 0            | 0    | 43.4 | 143.9           | 6.5                 | 7.5  | 0            | 14.0     | 0.9                          | 1.2            | 0            | 2.1      | 0    | 0       |
| Belgium, French-speaking *         | 208.1 | 110.9              | 1.0     | 0            | 14.8 | 63.0 | 189.8           | 6.3                 | 10.2 | 0            | 16.5     | 0.7                          | 1.0            | 0            | 1.7      | 0    | 0       |
| Bosnia and Herzegovina             | 128.6 | 114.0              | 0       | 0            | 0    | 12.3 | 126.3           | 0                   | 2.3  | 0            | 2.3      | 0                            | 0              | 0            | 0        | 0    | 0       |
| Denmark                            | 116.0 | 66.7               | 0       | 0            |      |      | 66.7            | 15.5                | 21.5 | 1.2          | 38.1     | 4.6                          | 6.7            | 0            | 11.2     | 0    | 0       |
| Estonia                            | 57.9  | 44.8               | 0       | 0            | 0    | 0    | 44.8            | 11.4                | 0    | 0            | 11.4     | 0                            | 1.6            | 0            | 1.6      | 0    | 0       |
| Finland                            | 88.7  | 61.3               | 1.1     | 0            | 0    | 0    | 62.5            | 6.2                 | 16.0 | 0            | 22.2     | 2.0                          | 2.0            | 0            | 4.0      | 0    | 0       |
| France                             | 154.0 | 104.7              | 0.1     | 0.1          | 0.5  | 27.1 | 132.6           | 2.9                 | 12.6 | 0            | 15.6     | 2.3                          | 3.6            | 0            | 5.9      | 0    | 0       |
| Greece                             | 219.5 | 205.9              | 0       | 0            | 0    | 1.3  | 207.2           | 2.0                 | 8.2  | 0            | 10.2     | 2.1                          | 0              | 0            | 2.1      | 0    | 0       |
| Iceland                            | 127.4 | 93.3               | 0       | 0            |      |      | 93.3            | 0                   | 24.8 | 0            | 24.8     | 3.1                          | 6.3            | 0            | 9.4      | 0    | 0       |
| Montenegro *                       | 129.4 | 129.4              | 0       | 0            | 0    | 0    | 129.4           | 0                   | 0    | 0            | 0        | 0                            | 0              | 0            | 0        | 0    | 0       |
| Norway                             | 103.9 | 65.6               | 0.2     | 0            |      |      | 65.8            |                     |      | 27.9         | 27.9     | 4.5                          | 5.7            | 0            | 10.2     | 0    | 0       |
| Romania //                         | 162.7 | 159.4              | 0       | 0            | 0    | 0.3  | 159.7           | 0.2                 | 2.4  | 0            | 2.6      | 0.4                          | 0.1            | 0            | 0.4      | 0    | 0       |
| Serbia                             | 71.3  | 61.2               | 0       | 0            | 0    | 1.6  | 62.8            | 0.5                 | 8.0  | 0            | 8.5      | 0                            | 0              | 0            | 0        | 0    | 0       |
| Spain, Andalusia                   | 142.9 | 118.3              | 0.3     | 0            |      |      | 118.7           |                     |      | 18.1         | 18.1     | 2.0                          | 4.0            | 0            | 6.0      | 0    | 0       |
| Spain, Aragon                      | 125.5 | 97.8               | 0       | 0            |      | 4.2  | 102.0           | 0.7                 | 18.4 | 0            | 19.1     | 2.9                          | 1.4            | 0            | 4.3      | 0    | 0       |
| Spain, Asturias                    | 135.1 | 105.0              | 0       | 0            |      | 0    | 105.0           | 5.9                 | 20.3 | 0            | 26.2     | 0.8                          | 3.2            | 0            | 3.9      | 0    | 0       |
| Spain, Basque country              | 116.9 | 82.3               | 0.8     | 0            |      |      | 83.1            | 0.7                 | 26.5 | 0            | 27.2     | 4.1                          | 2.6            | 0            | 6.6      | 0    | 0       |
| Spain, Canary Islands              | 173.0 | 131.7              | 0       | 0            | 0    | 0    | 131.7           | 0                   | 0    | 37.0         | 37.0     | 0.9                          | 3.4            | 0            | 4.3      | 0    | 0       |
| Spain, Cantabria *                 | 111.6 | 85.3               | 0       | 0            |      |      | 85.3            | 1.5                 | 13.5 | 0            | 15.0     | 0                            | 11.3           | 0            | 11.3     | 0    | 0       |
| Spain, Castile and León *          | 94.6  | 76.8               | 0       | 0            |      |      | 76.8            | 4.9                 | 9.5  | 0            | 14.4     | 2.8                          | 0.7            | 0            | 3.5      | 0    | 0       |
| Spain, Castile-La Mancha *         | 103.4 | 81.8               | 0       | 0            |      |      | 81.8            | 1.4                 | 19.2 | 0            | 20.6     | 0                            | 1.1            | 0            | 1.1      | 0    | 0       |
| Spain, Catalonia                   | 172.1 | 108.0              | 0.4     | 0            |      | 30.4 | 138.7           | 2.7                 | 18.9 | 0            | 21.7     | 6.3                          | 5.3            | 0            | 11.7     | 0    | 0       |
| Spain, Community of Madrid         | 114.3 | 91.4               | 0.3     | 0            |      |      | 91.7            | 5.9                 | 12.9 | 0            | 18.8     | 1.3                          | 2.4            | 0            | 3.7      | 0    | 0       |
| Spain, Extremadura                 | 129.0 | 112.5              | 0       | 0            |      |      | 112.5           | 8.8                 | 6.6  | 0            | 15.4     | 0                            | 1.0            | 0            | 1.0      | 0    | 0       |
| Spain, Galicia                     | 120.4 | 91.5               | 1.2     | 0            | 0    | 0    | 92.7            | 1.5                 | 23.4 | 0            | 24.9     | 2.5                          | 0.3            | 0            | 2.8      | 0    | 0       |
| Spain, La Rioja                    | 95.7  | 64.4               | 0       | 0            | 0    | 0    | 64.4            | 0                   | 31.3 | 0            | 31.3     | 0                            | 0              | 0            | 0        | 0    | 0       |
| Spain, Murcia                      | 157.2 | 134.2              | 0       | 0            | 0    | 0    | 134.2           | 0.6                 | 21.8 | 0            | 22.4     | 0.6                          | 0              | 0            | 0.6      | 0    | 0       |
| Spain, Navarre *                   | 104.5 | 69.5               | 2.9     | 0            |      |      | 72.3            | 26.1                | 4.5  | 0            | 30.5     | 0                            | 1.6            | 0            | 1.6      | 0    | 0       |
| Spain, Valencian region            | 147.7 | 114.6              | 1.3     | 0            |      |      | 116.0           | 1.9                 | 21.5 | 0            | 23.4     | 1.3                          | 7.1            | 0            | 8.3      | 0    | 0       |
| Sweden                             | 106.5 | 61.6               | 0.1     | 0            |      |      | 61.7            |                     |      | 36.6         | 36.6     | 3.7                          | 4.5            | 0            | 8.2      | 0    | 0       |
| Switzerland                        | 96.1  | 76.1               | 0.6     | 2.0          | 0.3  | 0    | 79.0            | 3.0                 | 9.2  | 0.2          | 12.4     | 2.9                          | 1.8            | 0            | 4.7      | 0    | 0       |
| the Netherlands                    | 108.7 | 74.4               | 0.1     | 0            |      | 1.1  | 75.6            | 6.6                 | 13.5 | 0            | 20.1     | 10.9                         | 2.1            | 0            | 13.0     | 0    | 0       |
| United Kingdom, England #          | 110.3 | 65.7               | 0.2     |              | 0.3  | 12.3 | 78.6            | 10.3                | 14.8 | 0.4          | 25.4     | 2.6                          | 3.5            | 0.1          | 6.2      | 0    | 0       |
| United Kingdom, Northern Ireland # | 115.5 | 82.0               |         | 0            |      | 0    | 83.1            | 6.3                 |      | 0            | 9.3      | 5.7                          | 17.4           | 0            | 23.1     | 0    | 0       |
| United Kingdom, Scotland           | 97.8  | 70.9               | 0       | 0            |      |      | 70.9            | 0                   | 0    | 0            | 18.7     | 0                            | 0              | 0            | 8.2      | 0    | 0       |
| United Kingdom, Wales #            | 107.4 | 70.2               |         | 0            |      | 7.3  | 78.0            | 7.0                 | 17.1 | 0            | 24.1     | 2.3                          | 3.0            | 0            | 5.2      | 0    | 0       |

Abbreviations used: HD: haemodialysis; Unkn: unknown; HF: haemofiltration; HDF: haemodiafiltration; APD: automated peritoneal dialysis; CAPD: continuous ambulatory peritoneal dialysis; PD: peritoneal dialysis; Tx: transplant  
 Categories may not add up because of rounding off; When cells are left empty, (complete) data are unavailable

§ The incidence is underestimated by approximately 1% due to an estimated 1.2% underestimation of the incidence of haemodialysis

\* Patients younger than 20 years of age are not reported

// The incidence of pre-emptive transplantation is underestimated by approximately 30%

# Values based on 1 to 5 patients are suppressed

Table B.2.10  
Treatment modality distribution, unadjusted  
at day 1

|                                    | All | Haemodialysis          |         |                 |     |      |                        | Peritoneal dialysis |      |                    |             | Preemptive kidney transplant |                   |                    |             | Unkn | Missing |
|------------------------------------|-----|------------------------|---------|-----------------|-----|------|------------------------|---------------------|------|--------------------|-------------|------------------------------|-------------------|--------------------|-------------|------|---------|
|                                    |     | HD hospital/<br>centre | HD home | HD type<br>Unkn | HF  | HDF  | Total<br>HD/<br>HF/HDF | APD                 | CAPD | PD<br>type<br>Unkn | Total<br>PD | Living<br>donor              | Deceased<br>donor | Tx<br>type<br>Unkn | Total<br>Tx |      |         |
|                                    |     | %                      | %       | %               | %   | %    | %                      | %                   | %    | %                  | %           | %                            | %                 | %                  | %           |      |         |
| Austria \$                         | 100 | 75.6                   | 0       | 0               | 0.9 | 12.2 | 88.7                   | 2.0                 | 5.9  | 0.2                | 8.1         | 1.4                          | 1.8               | 0                  | 3.2         | 0    | 0       |
| Belgium, Dutch-speaking *          | 100 | 63.1                   | 0       | 0               | 0   | 27.2 | 90.2                   | 3.9                 | 4.7  | 0                  | 8.6         | 0.5                          | 0.7               | 0                  | 1.2         | 0    | 0       |
| Belgium, French-speaking *         | 100 | 53.5                   | 0.5     | 0               | 7.2 | 29.9 | 91.1                   | 3.1                 | 5.0  | 0                  | 8.1         | 0.3                          | 0.5               | 0                  | 0.8         | 0    | 0       |
| Bosnia and Herzegovina             | 100 | 88.5                   | 0       | 0               | 0   | 9.6  | 98.0                   | 0                   | 2.0  | 0                  | 2.0         | 0                            | 0                 | 0                  | 0           | 0    | 0       |
| Denmark                            | 100 | 57.7                   | 0       | 0               |     |      | 57.7                   | 13.3                | 18.5 | 1.0                | 32.8        | 3.8                          | 5.7               | 0                  | 9.5         | 0    | 0       |
| Estonia                            | 100 | 77.6                   | 0       | 0               | 0   | 0    | 77.6                   | 19.7                | 0    | 0                  | 19.7        | 0                            | 2.6               | 0                  | 2.6         | 0    | 0       |
| Finland                            | 100 | 69.7                   | 1.1     | 0               | 0   | 0    | 70.9                   | 6.3                 | 18.6 | 0                  | 24.9        | 2.1                          | 2.1               | 0                  | 4.2         | 0    | 0       |
| France                             | 100 | 68.2                   | 0.1     | 0.1             | 0.3 | 17.7 | 86.4                   | 1.9                 | 8.2  | 0                  | 10.1        | 1.4                          | 2.1               | 0                  | 3.5         | 0    | 0       |
| Greece                             | 100 | 94.2                   | 0       | 0               | 0   | 0.6  | 94.8                   | 0.8                 | 3.6  | 0                  | 4.4         | 0.8                          | 0                 | 0                  | 0.8         | 0    | 0       |
| Iceland                            | 100 | 71.1                   | 0       | 0               |     |      | 71.1                   | 0                   | 21.1 | 0                  | 21.1        | 2.6                          | 5.3               | 0                  | 7.9         | 0    | 0       |
| Montenegro *                       | 100 | 100                    | 0       | 0               | 0   | 0    | 100                    | 0                   | 0    | 0                  | 0           | 0                            | 0                 | 0                  | 0           | 0    | 0       |
| Norway                             | 100 | 63.2                   | 0.2     | 0               |     |      | 63.4                   |                     |      | 26.7               | 26.7        | 4.4                          | 5.5               | 0                  | 9.9         | 0    | 0       |
| Romania //                         | 100 | 98.0                   | 0       | 0               | 0   | 0.2  | 98.1                   | 0.1                 | 1.5  | 0                  | 1.6         | 0.2                          | 0                 | 0                  | 0.3         | 0    | 0       |
| Serbia                             | 100 | 86.3                   | 0       | 0               | 0   | 2.1  | 88.4                   | 0.6                 | 11.0 | 0                  | 11.6        | 0                            | 0                 | 0                  | 0           | 0    | 0       |
| Spain, Andalusia                   | 100 | 82.4                   | 0.3     | 0               |     |      | 82.7                   |                     |      | 12.8               | 12.8        | 1.5                          | 3.0               | 0                  | 4.5         | 0    | 0       |
| Spain, Aragon                      | 100 | 78.0                   | 0       | 0               |     | 3.3  | 81.3                   | 0.5                 | 14.8 | 0                  | 15.4        | 2.2                          | 1.1               | 0                  | 3.3         | 0    | 0       |
| Spain, Asturias                    | 100 | 78.8                   | 0       | 0               |     | 0    | 78.8                   | 3.5                 | 14.7 | 0                  | 18.2        | 0.6                          | 2.4               | 0                  | 2.9         | 0    | 0       |
| Spain, Basque country              | 100 | 70.5                   | 0.7     | 0               |     |      | 71.2                   | 0.7                 | 22.6 | 0                  | 23.3        | 3.5                          | 2.1               | 0                  | 5.6         | 0    | 0       |
| Spain, Canary Islands              | 100 | 75.9                   | 0       | 0               | 0   | 0    | 75.9                   | 0                   | 0    | 21.5               | 21.5        | 0.5                          | 2.1               | 0                  | 2.6         | 0    | 0       |
| Spain, Cantabria *                 | 100 | 76.7                   | 0       | 0               |     |      | 76.7                   | 1.4                 | 12.3 | 0                  | 13.7        | 0                            | 9.6               | 0                  | 9.6         | 0    | 0       |
| Spain, Castile and León *          | 100 | 82.1                   | 0       | 0               |     |      | 82.1                   | 5.3                 | 9.5  | 0                  | 14.7        | 2.5                          | 0.7               | 0                  | 3.2         | 0    | 0       |
| Spain, Castile-La Mancha *         | 100 | 79.1                   | 0       | 0               |     |      | 79.1                   | 1.4                 | 18.6 | 0                  | 20.0        | 0                            | 0.9               | 0                  | 0.9         | 0    | 0       |
| Spain, Catalonia                   | 100 | 62.6                   | 0.2     | 0               |     | 17.7 | 80.5                   | 1.6                 | 11.0 | 0                  | 12.6        | 3.7                          | 3.1               | 0                  | 6.8         | 0    | 0       |
| Spain, Community of Madrid         | 100 | 79.6                   | 0.3     | 0               |     |      | 79.9                   | 5.4                 | 11.4 | 0                  | 16.8        | 1.2                          | 2.1               | 0                  | 3.4         | 0    | 0       |
| Spain, Extremadura                 | 100 | 88.0                   | 0       | 0               |     |      | 88.0                   | 6.7                 | 4.7  | 0                  | 11.3        | 0                            | 0.7               | 0                  | 0.7         | 0    | 0       |
| Spain, Galicia                     | 100 | 76.6                   | 1.0     | 0               | 0   | 0    | 77.6                   | 1.0                 | 19.3 | 0                  | 20.4        | 1.8                          | 0.3               | 0                  | 2.0         | 0    | 0       |
| Spain, La Rioja                    | 100 | 66.7                   | 0       | 0               | 0   | 0    | 66.7                   | 0                   | 33.3 | 0                  | 33.3        | 0                            | 0                 | 0                  | 0           | 0    | 0       |
| Spain, Murcia                      | 100 | 84.4                   | 0       | 0               | 0   | 0    | 84.4                   | 0.5                 | 14.6 | 0                  | 15.1        | 0.5                          | 0                 | 0                  | 0.5         | 0    | 0       |
| Spain, Navarre *                   | 100 | 65.7                   | 2.9     | 0               |     |      | 68.6                   | 25.7                | 4.3  | 0                  | 30.0        | 0                            | 1.4               | 0                  | 1.4         | 0    | 0       |
| Spain, Valencian region            | 100 | 77.6                   | 0.9     | 0               |     |      | 78.5                   | 1.3                 | 14.6 | 0                  | 15.9        | 0.8                          | 4.8               | 0                  | 5.6         | 0    | 0       |
| Sweden                             | 100 | 58.3                   | 0.1     | 0               |     |      | 58.4                   |                     |      | 34.3               | 34.3        | 3.3                          | 4.0               | 0                  | 7.3         | 0    | 0       |
| Switzerland                        | 100 | 79.3                   | 0.6     | 2.0             | 0.4 | 0    | 82.3                   | 3.1                 | 9.6  | 0.2                | 12.9        | 3.1                          | 1.8               | 0                  | 4.8         | 0    | 0       |
| the Netherlands                    | 100 | 68.7                   | 0.1     | 0               |     | 1.0  | 69.7                   | 6.1                 | 12.5 | 0                  | 18.6        | 9.8                          | 1.9               | 0                  | 11.7        | 0    | 0       |
| United Kingdom, England #          | 100 | 59.6                   | 0.2     |                 | 0.3 | 11.2 | 71.3                   | 9.3                 | 13.4 | 0.3                | 23.1        | 2.3                          | 3.2               | 0.1                | 5.6         | 0    | 0       |
| United Kingdom, Northern Ireland # | 100 | 70.9                   |         | 0               |     | 0    | 71.8                   | 5.3                 |      | 0                  | 7.8         | 5.3                          | 15.0              | 0                  | 20.4        | 0    | 0       |
| United Kingdom, Scotland           | 100 | 72.9                   | 0       | 0               |     |      | 72.9                   | 0                   | 0    | 0                  | 18.8        | 0                            | 0                 | 0                  | 8.3         | 0    | 0       |
| United Kingdom, Wales #            | 100 | 66.3                   |         | 0               |     | 6.7  | 73.6                   | 6.5                 | 15.4 | 0                  | 21.9        | 2.0                          | 2.5               | 0                  | 4.5         | 0    | 0       |

Abbreviations used: HD: haemodialysis; Unkn: unknown; HF: haemofiltration; HDF: haemodiafiltration; APD: automated peritoneal dialysis; CAPD: continuous ambulatory peritoneal dialysis; PD: peritoneal dialysis; Tx: transplant  
Categories may not add up because of rounding off; When cells are left empty, (complete) data are unavailable

\$ The incidence is underestimated by approximately 1% due to an estimated 1.2% underestimation of the incidence of haemodialysis

\* Patients younger than 20 years of age are not reported

// The incidence of pre-emptive transplantation is underestimated by approximately 30%

# Values based on 1 to 5 patients are suppressed

Table B.2.11  
Treatment modality distribution by age, sex, and primary renal disease, unadjusted  
at day 1

|                                    | All |    |    |    | 0-19 |     |     |    | 20-44 |    |    |    | 45-64 |    |    |    | 65-74 |    |    |    | 75+ |    |    |    | Men |    |    |    | Women |    |    |    | DM  |    |    |    | Non-DM |    |    |    |    |    |    |    |
|------------------------------------|-----|----|----|----|------|-----|-----|----|-------|----|----|----|-------|----|----|----|-------|----|----|----|-----|----|----|----|-----|----|----|----|-------|----|----|----|-----|----|----|----|--------|----|----|----|----|----|----|----|
|                                    | HD  | PD | Tx | Un | HD   | PD  | Tx  | Un | HD    | PD | Tx | Un | HD    | PD | Tx | Un | HD    | PD | Tx | Un | HD  | PD | Tx | Un | HD  | PD | Tx | Un | HD    | PD | Tx | Un | HD  | PD | Tx | Un | HD     | PD | Tx | Un | HD | PD | Tx | Un |
|                                    | %   | %  | %  | %  | %    | %   | %   | %  | %     | %  | %  | %  | %     | %  | %  | %  | %     | %  | %  | %  | %   | %  | %  | %  | %   | %  | %  | %  | %     | %  | %  | %  | %   | %  | %  | %  | %      | %  | %  | %  | %  | %  | %  | %  |
| Austria §                          | 89  | 8  | 3  | 0  | 15   | 38  | 46  | 0  | 77    | 14 | 9  | 0  | 85    | 11 | 4  | 0  | 92    | 6  | 2  | 0  | 95  | 5  | 0  | 0  | 87  | 9  | 4  | 0  | 91    | 7  | 2  | 0  | 91  | 6  | 3  | 0  | 88     | 9  | 3  | 0  |    |    |    |    |
| Belgium, Dutch-speaking *          | 90  | 9  | 1  | 0  |      |     |     |    | 82    | 15 | 3  | 0  | 80    | 16 | 4  | 0  | 92    | 7  | 0  | 0  | 95  | 5  | 0  | 0  | 89  | 9  | 1  | 0  | 92    | 7  | 1  | 0  | 90  | 9  | 0  | 0  | 90     | 8  | 1  | 0  |    |    |    |    |
| Belgium, French-speaking *         | 91  | 8  | 1  | 0  |      |     |     |    | 83    | 11 | 6  | 0  | 88    | 11 | 1  | 0  | 92    | 8  | 0  | 0  | 95  | 5  | 0  | 0  | 92  | 8  | 1  | 0  | 90    | 9  | 1  | 0  | 91  | 8  | 0  | 0  | 91     | 8  | 1  | 0  |    |    |    |    |
| Bosnia and Herzegovina             | 98  | 2  | 0  | 0  | 100  | 0   | 0   | 0  | 97    | 3  | 0  | 0  | 97    | 3  | 0  | 0  | 98    | 2  | 0  | 0  | 100 | 0  | 0  | 0  | 98  | 2  | 0  | 0  | 98    | 2  | 0  | 0  | 98  | 2  | 0  | 0  | 98     | 2  | 0  | 0  |    |    |    |    |
| Denmark                            | 58  | 33 | 9  | 0  | 44   | 33  | 22  | 0  | 45    | 36 | 19 | 0  | 56    | 32 | 12 | 0  | 60    | 31 | 9  | 0  | 62  | 35 | 2  | 0  | 58  | 33 | 9  | 0  | 58    | 32 | 10 | 0  | 68  | 30 | 3  | 0  | 54     | 34 | 12 | 0  |    |    |    |    |
| Estonia                            | 78  | 20 | 3  | 0  | 50   | 0   | 50  | 0  | 80    | 10 | 10 | 0  | 73    | 27 | 0  | 0  | 81    | 19 | 0  | 0  | 85  | 15 | 0  | 0  | 85  | 15 | 0  | 0  | 69    | 25 | 6  | 0  | 72  | 28 | 0  | 0  | 79     | 17 | 3  | 0  |    |    |    |    |
| Finland                            | 71  | 25 | 4  | 0  | 55   | 9   | 36  | 0  | 66    | 25 | 9  | 0  | 68    | 27 | 4  | 0  | 73    | 26 | 1  | 0  | 78  | 21 | 1  | 0  | 72  | 24 | 4  | 0  | 68    | 27 | 5  | 0  | 73  | 25 | 2  | 0  | 70     | 25 | 5  | 0  |    |    |    |    |
| France                             | 86  | 10 | 4  | 0  | 67   | 24  | 9   | 0  | 76    | 11 | 13 | 0  | 84    | 10 | 7  | 0  | 90    | 8  | 1  | 0  | 88  | 11 | 0  | 0  | 87  | 10 | 3  | 0  | 85    | 11 | 4  | 0  | 90  | 9  | 1  | 0  | 85     | 11 | 4  | 0  |    |    |    |    |
| Greece                             | 95  | 4  | 1  | 0  | 67   | 17  | 17  | 0  | 82    | 7  | 12 | 0  | 93    | 7  | 1  | 0  | 95    | 5  | 0  | 0  | 97  | 3  | 0  | 0  | 95  | 4  | 1  | 0  | 94    | 5  | 1  | 0  | 96  | 4  | 0  | 0  | 94     | 4  | 1  | 0  |    |    |    |    |
| Iceland                            | 71  | 21 | 8  | 0  | 0    | 100 | 0   | 0  | 50    | 50 | 0  | 0  | 56    | 22 | 22 | 0  | 88    | 0  | 13 | 0  | 81  | 19 | 0  | 0  | 70  | 26 | 4  | 0  | 73    | 13 | 13 | 0  | 60  | 0  | 40 | 0  | 73     | 24 | 3  | 0  |    |    |    |    |
| Montenegro *                       | 100 | 0  | 0  | 0  |      |     |     |    | 100   | 0  | 0  | 0  | 100   | 0  | 0  | 0  | 100   | 0  | 0  | 0  | 100 | 0  | 0  | 0  | 100 | 0  | 0  | 0  | 100   | 0  | 0  | 0  | 100 | 0  | 0  | 0  | 100    | 0  | 0  | 0  |    |    |    |    |
| Norway                             | 63  | 27 | 10 | 0  | 38   | 31  | 31  | 0  | 68    | 17 | 15 | 0  | 62    | 22 | 16 | 0  | 68    | 26 | 6  | 0  | 60  | 38 | 2  | 0  | 62  | 28 | 10 | 0  | 66    | 24 | 10 | 0  | 71  | 24 | 4  | 0  | 62     | 27 | 11 | 0  |    |    |    |    |
| Romania //                         | 98  | 2  | 0  | 0  | 76   | 21  | 3   | 0  | 95    | 3  | 2  | 0  | 98    | 2  | 0  | 0  | 99    | 1  | 0  | 0  | 99  | 1  | 0  | 0  | 98  | 1  | 0  | 0  | 98    | 2  | 0  | 0  | 97  | 3  | 0  | 0  | 98     | 1  | 0  | 0  |    |    |    |    |
| Serbia                             | 88  | 12 | 0  | 0  | 63   | 38  | 0   | 0  | 73    | 27 | 0  | 0  | 90    | 10 | 0  | 0  | 93    | 7  | 0  | 0  | 92  | 8  | 0  | 0  | 89  | 11 | 0  | 0  | 88    | 12 | 0  | 0  | 86  | 14 | 0  | 0  | 90     | 10 | 0  | 0  |    |    |    |    |
| Spain, Andalusia                   | 83  | 13 | 4  | 0  | 24   | 12  | 65  | 0  | 75    | 18 | 7  | 0  | 77    | 16 | 7  | 0  | 85    | 13 | 1  | 0  | 93  | 7  | 1  | 0  | 84  | 12 | 4  | 0  | 81    | 14 | 4  | 0  | 86  | 11 | 3  | 0  | 81     | 14 | 5  | 0  |    |    |    |    |
| Spain, Aragon                      | 81  | 15 | 3  | 0  | 33   | 33  | 33  | 0  | 76    | 14 | 10 | 0  | 73    | 23 | 4  | 0  | 94    | 4  | 2  | 0  | 83  | 17 | 0  | 0  | 79  | 18 | 4  | 0  | 89    | 9  | 2  | 0  | 87  | 11 | 2  | 0  | 79     | 17 | 4  | 0  |    |    |    |    |
| Spain, Asturias                    | 79  | 18 | 3  | 0  | 50   | 50  | 0   | 0  | 78    | 22 | 0  | 0  | 73    | 24 | 2  | 0  | 72    | 22 | 5  | 0  | 91  | 7  | 2  | 0  | 82  | 14 | 4  | 0  | 72    | 26 | 2  | 0  | 86  | 14 | 0  | 0  | 76     | 20 | 4  | 0  |    |    |    |    |
| Spain, Basque country              | 71  | 23 | 6  | 0  | 33   | 17  | 50  | 0  | 75    | 21 | 4  | 0  | 61    | 30 | 9  | 0  | 68    | 26 | 6  | 0  | 84  | 16 | 0  | 0  | 70  | 25 | 4  | 0  | 73    | 19 | 8  | 0  | 81  | 16 | 3  | 0  | 68     | 26 | 7  | 0  |    |    |    |    |
| Spain, Canary Islands              | 76  | 21 | 3  | 0  | 75   | 25  | 0   | 0  | 62    | 30 | 8  | 0  | 76    | 21 | 4  | 0  | 76    | 23 | 2  | 0  | 82  | 18 | 0  | 0  | 75  | 23 | 2  | 0  | 77    | 18 | 4  | 0  | 78  | 20 | 2  | 0  | 75     | 22 | 3  | 0  |    |    |    |    |
| Spain, Cantabria *                 | 77  | 14 | 10 | 0  |      |     |     |    | 50    | 25 | 25 | 0  | 89    | 6  | 6  | 0  | 73    | 13 | 13 | 0  | 82  | 18 | 0  | 0  | 76  | 13 | 11 | 0  | 79    | 16 | 5  | 0  | 81  | 10 | 10 | 0  | 75     | 15 | 10 | 0  |    |    |    |    |
| Spain, Castile and León *          | 82  | 15 | 3  | 0  |      |     |     |    | 60    | 27 | 13 | 0  | 73    | 21 | 6  | 0  | 89    | 9  | 2  | 0  | 87  | 13 | 0  | 0  | 85  | 13 | 3  | 0  | 77    | 19 | 4  | 0  | 90  | 7  | 3  | 0  | 80     | 17 | 3  | 0  |    |    |    |    |
| Spain, Castile-La Mancha *         | 79  | 20 | 1  | 0  |      |     |     |    | 57    | 36 | 7  | 0  | 72    | 28 | 0  | 0  | 86    | 12 | 2  | 0  | 89  | 11 | 0  | 0  | 81  | 18 | 1  | 0  | 75    | 23 | 1  | 0  | 87  | 13 | 0  | 0  | 76     | 23 | 1  | 0  |    |    |    |    |
| Spain, Catalonia                   | 81  | 13 | 7  | 0  | 55   | 0   | 45  | 0  | 74    | 10 | 17 | 0  | 73    | 17 | 10 | 0  | 78    | 16 | 6  | 0  | 91  | 8  | 1  | 0  | 80  | 13 | 7  | 0  | 81    | 12 | 7  | 0  | 88  | 11 | 1  | 0  | 79     | 13 | 8  | 0  |    |    |    |    |
| Spain, Community of Madrid         | 80  | 17 | 3  | 0  | 57   | 29  | 14  | 0  | 58    | 32 | 10 | 0  | 76    | 20 | 3  | 0  | 80    | 17 | 3  | 0  | 93  | 7  | 0  | 0  | 80  | 17 | 2  | 0  | 79    | 16 | 6  | 0  | 89  | 11 | 1  | 0  | 77     | 19 | 4  | 0  |    |    |    |    |
| Spain, Extremadura                 | 88  | 11 | 1  | 0  | 0    | 0   | 0   | 0  | 78    | 22 | 0  | 0  | 86    | 14 | 0  | 0  | 89    | 9  | 2  | 0  | 93  | 8  | 0  | 0  | 90  | 10 | 0  | 0  | 83    | 15 | 2  | 0  | 92  | 8  | 0  | 0  | 86     | 13 | 1  | 0  |    |    |    |    |
| Spain, Galicia                     | 78  | 20 | 2  | 0  | 0    | 0   | 100 | 0  | 70    | 22 | 9  | 0  | 70    | 26 | 4  | 0  | 83    | 17 | 0  | 0  | 82  | 18 | 0  | 0  | 79  | 19 | 2  | 0  | 73    | 24 | 3  | 0  | 86  | 13 | 1  | 0  | 74     | 23 | 2  | 0  |    |    |    |    |
| Spain, La Rioja                    | 67  | 33 | 0  | 0  | 0    | 0   | 0   | 0  | 100   | 0  | 0  | 0  | 55    | 45 | 0  | 0  | 63    | 38 | 0  | 0  | 75  | 25 | 0  | 0  | 61  | 39 | 0  | 0  | 73    | 27 | 0  | 0  | 67  | 33 | 0  | 0  | 67     | 33 | 0  | 0  |    |    |    |    |
| Spain, Murcia                      | 84  | 15 | 0  | 0  | 50   | 50  | 0   | 0  | 80    | 20 | 0  | 0  | 75    | 23 | 1  | 0  | 86    | 14 | 0  | 0  | 96  | 4  | 0  | 0  | 85  | 15 | 0  | 0  | 84    | 14 | 2  | 0  | 94  | 6  | 0  | 0  | 82     | 18 | 1  | 0  |    |    |    |    |
| Spain, Navarre *                   | 69  | 30 | 1  | 0  |      |     |     |    | 60    | 33 | 7  | 0  | 76    | 24 | 0  | 0  | 61    | 39 | 0  | 0  | 75  | 25 | 0  | 0  | 67  | 33 | 0  | 0  | 71    | 25 | 4  | 0  | 73  | 27 | 0  | 0  | 66     | 32 | 2  | 0  |    |    |    |    |
| Spain, Valencian region            | 79  | 16 | 6  | 0  | 0    | 0   | 100 | 0  | 63    | 25 | 11 | 0  | 67    | 23 | 11 | 0  | 81    | 15 | 4  | 0  | 91  | 9  | 0  | 0  | 80  | 16 | 4  | 0  | 74    | 17 | 9  | 0  | 85  | 12 | 3  | 0  | 77     | 17 | 6  | 0  |    |    |    |    |
| Sweden                             | 58  | 34 | 7  | 0  | 17   | 43  | 39  | 0  | 45    | 44 | 12 | 0  | 58    | 32 | 11 | 0  | 63    | 30 | 7  | 0  | 63  | 36 | 1  | 0  | 59  | 35 | 6  | 0  | 56    | 34 | 10 | 0  | 64  | 32 | 3  | 0  | 56     | 35 | 9  | 0  |    |    |    |    |
| Switzerland                        | 82  | 13 | 5  | 0  | 38   | 23  | 38  | 0  | 71    | 16 | 13 | 0  | 74    | 18 | 8  | 0  | 86    | 13 | 1  | 0  | 93  | 7  | 0  | 0  | 84  | 12 | 4  | 0  | 78    | 15 | 7  | 0  | 81  | 14 | 5  | 0  | 83     | 13 | 5  | 0  |    |    |    |    |
| the Netherlands                    | 70  | 19 | 12 | 0  | 50   | 30  | 20  | 0  | 62    | 13 | 25 | 0  | 63    | 18 | 19 | 0  | 72    | 21 | 8  | 0  | 80  | 19 | 1  | 0  | 71  | 19 | 11 | 0  | 68    | 18 | 13 | 0  | 79  | 19 | 2  | 0  | 67     | 19 | 14 | 0  |    |    |    |    |
| United Kingdom, England #          | 71  | 23 | 6  | 0  | 44   | 37  | 19  | 0  | 57    | 32 | 11 | 0  | 71    | 23 | 6  | 0  | 75    | 20 | 5  | 0  | 79  | 20 | 1  | 0  | 72  | 22 | 5  | 0  | 70    | 24 | 6  | 0  | 75  | 23 | 2  | 0  | 70     | 23 | 7  | 0  |    |    |    |    |
| United Kingdom, Northern Ireland # | 72  | 8  | 20 | 0  |      |     |     |    | 46    | 46 | 43 | 0  | 68    |    | 29 | 0  | 84    |    |    |    | 86  | 14 | 0  | 0  | 75  | 8  | 17 | 0  | 66    | 8  | 26 | 0  | 82  |    |    |    | 69     | 7  | 24 | 0  |    |    |    |    |
| United Kingdom, Scotland           | 73  | 19 | 8  | 0  | 44   | 44  | 11  | 0  | 57    | 21 | 21 | 0  | 69    | 21 | 10 | 0  | 82    | 14 | 4  | 0  | 82  | 17 | 1  | 0  | 73  | 20 | 8  | 0  | 73    | 17 | 9  | 0  | 79  | 16 | 5  | 0  | 70     | 20 | 10 | 0  |    |    |    |    |
| United Kingdom, Wales #            | 74  | 22 | 4  | 0  | 89   | 0   |     |    | 54    | 35 | 12 | 0  | 68    | 26 | 6  | 0  | 78    | 20 |    |    | 87  | 13 | 0  | 0  | 74  | 22 | 4  | 0  | 73    | 22 | 5  | 0  | 75  | 22 |    |    | 73     | 22 | 5  | 0  |    |    |    |    |

Abbreviations used: HD: haemodialysis; PD: peritoneal dialysis; Tx: transplant; Un: unknown; DM: diabetes mellitus

Categories may not add up because of missing values or rounding off

§ The incidence is underestimated by approximately 1% due to an estimated 1.2% underestimation of the incidence of haemodialysis

\* Patients younger than 20 years of age are not reported

// The incidence of pre-emptive transplantation is underestimated by approximately 30%

# Values based on 1 to 5 patients are suppressed

Table B.3.1  
**Incident counts and percentages by age and sex**  
*at day 91*

|                                      | All      |          |          | 0-19 |     |       | 20-44 |     |       | 45-64 |     |       | 65-74 |     |       | 75+  |     |       |    |     |    |      |    |      |    |     |    |      |    |      |    |      |    |
|--------------------------------------|----------|----------|----------|------|-----|-------|-------|-----|-------|-------|-----|-------|-------|-----|-------|------|-----|-------|----|-----|----|------|----|------|----|-----|----|------|----|------|----|------|----|
|                                      | All      | Men      | Women    | All  | Men | Women | All   | Men | Women | All   | Men | Women | All   | Men | Women | All  | Men | Women |    |     |    |      |    |      |    |     |    |      |    |      |    |      |    |
|                                      | N (100%) | N (100%) | N (100%) | N    | %   | N     | %     | N   | %     | N     | %   | N     | %     | N   | %     | N    | %   | N     | %  |     |    |      |    |      |    |     |    |      |    |      |    |      |    |
| Austria §                            | 934      | 618      | 316      | 12   | 1   | 8     | 1     | 4   | 1     | 101   | 11  | 60    | 10    | 41  | 13    | 287  | 31  | 203   | 33 | 84  | 27 | 256  | 27 | 174  | 28 | 82  | 26 | 278  | 30 | 173  | 28 | 105  | 33 |
| Belgium, Dutch-speaking *            | 1047     | 665      | 382      |      |     |       |       |     |       | 56    | 5   | 36    | 5     | 20  | 5     | 245  | 23  | 160   | 24 | 85  | 22 | 263  | 25 | 171  | 26 | 92  | 24 | 483  | 46 | 298  | 45 | 185  | 48 |
| Belgium, French-speaking *           | 776      | 480      | 296      |      |     |       |       |     |       | 54    | 7   | 33    | 7     | 21  | 7     | 225  | 29  | 141   | 29 | 84  | 28 | 258  | 33 | 158  | 33 | 100 | 34 | 239  | 31 | 148  | 31 | 91   | 31 |
| Bosnia and Herzegovina               | 360      | 225      | 135      | 5    | 1   | 2     | 1     | 3   | 2     | 35    | 10  | 22    | 10    | 13  | 10    | 144  | 40  | 90    | 40 | 54  | 40 | 118  | 33 | 81   | 36 | 37  | 27 | 58   | 16 | 30   | 13 | 28   | 21 |
| Denmark                              | 673      | 447      | 226      | 9    | 1   | 4     | 1     | 5   | 2     | 67    | 10  | 50    | 11    | 17  | 8     | 215  | 32  | 144   | 32 | 71  | 31 | 202  | 30 | 136  | 30 | 66  | 29 | 180  | 27 | 113  | 25 | 67   | 30 |
| Estonia                              | 75       | 39       | 36       | 2    | 3   | 1     | 3     | 1   | 3     | 10    | 13  | 4     | 10    | 6   | 17    | 30   | 40  | 15    | 38 | 15  | 42 | 20   | 27 | 10   | 26 | 10  | 28 | 13   | 17 | 9    | 23 | 4    | 11 |
| Finland                              | 517      | 324      | 193      | 11   | 2   | 7     | 2     | 4   | 2     | 87    | 17  | 43    | 13    | 44  | 23    | 162  | 31  | 100   | 31 | 62  | 32 | 148  | 29 | 99   | 31 | 49  | 25 | 109  | 21 | 75   | 23 | 34   | 18 |
| France †                             | 9880     | 6444     | 3436     | 113  | 1   | 69    | 1     | 45  | 1     | 909   | 9   | 568   | 9     | 341 | 10    | 2522 | 26  | 1610  | 25 | 912 | 27 | 2881 | 29 | 1913 | 30 | 967 | 28 | 3455 | 35 | 2284 | 35 | 1171 | 34 |
| Greece                               | 2463     | 1650     | 813      | 12   | 0   | 8     | 0     | 4   | 0     | 117   | 5   | 80    | 5     | 37  | 5     | 549  | 22  | 368   | 22 | 181 | 22 | 659  | 27 | 463  | 28 | 196 | 24 | 1126 | 46 | 731  | 44 | 395  | 49 |
| Iceland                              | 35       | 22       | 13       | 1    | 3   | 1     | 5     | 0   | 0     | 4     | 11  | 3     | 14    | 1   | 8     | 8    | 23  | 2     | 9  | 6   | 46 | 8    | 23 | 7    | 32 | 1   | 8  | 14   | 40 | 9    | 41 | 5    | 38 |
| Montenegro * ‡                       | 59       | 41       | 18       |      |     |       |       |     |       | 11    | 19  | 6     | 15    | 5   | 28    | 29   | 49  | 20    | 49 | 9   | 50 | 14   | 24 | 12   | 29 | 3   | 17 | 5    | 8  | 4    | 10 | 1    | 6  |
| Norway                               | 523      | 354      | 169      | 13   | 2   | 8     | 2     | 5   | 3     | 67    | 13  | 49    | 14    | 18  | 11    | 174  | 33  | 112   | 32 | 62  | 37 | 140  | 27 | 98   | 28 | 42  | 25 | 129  | 25 | 87   | 25 | 42   | 25 |
| Romania                              | 2300     | 1370     | 930      | 27   | 1   | 17    | 1     | 10  | 1     | 286   | 12  | 180   | 13    | 106 | 11    | 943  | 41  | 592   | 43 | 351 | 38 | 724  | 31 | 408  | 30 | 316 | 34 | 320  | 14 | 173  | 13 | 147  | 16 |
| Serbia                               | 502      | 317      | 185      | 9    | 2   | 7     | 2     | 2   | 1     | 60    | 12  | 38    | 12    | 22  | 12    | 215  | 43  | 137   | 43 | 78  | 42 | 154  | 31 | 94   | 30 | 60  | 32 | 64   | 13 | 41   | 13 | 23   | 12 |
| Spain, Andalusia                     | 1160     | 739      | 421      | 17   | 1   | 12    | 2     | 5   | 1     | 120   | 10  | 65    | 9     | 55  | 13    | 365  | 31  | 256   | 35 | 109 | 26 | 335  | 29 | 205  | 28 | 130 | 31 | 323  | 28 | 201  | 27 | 122  | 29 |
| Spain, Aragon                        | 177      | 132      | 45       | 3    | 2   | 1     | 1     | 2   | 4     | 20    | 11  | 15    | 11    | 5   | 11    | 54   | 31  | 37    | 28 | 17  | 38 | 46   | 26 | 32   | 24 | 14  | 31 | 54   | 31 | 47   | 36 | 7    | 16 |
| Spain, Asturias                      | 164      | 110      | 54       | 2    | 1   | 2     | 2     | 0   | 0     | 8     | 5   | 7     | 6     | 1   | 2     | 44   | 27  | 33    | 30 | 11  | 20 | 56   | 34 | 34   | 31 | 22  | 41 | 54   | 33 | 34   | 31 | 20   | 37 |
| Spain, Basque country                | 276      | 194      | 82       | 6    | 2   | 1     | 1     | 5   | 6     | 23    | 8   | 16    | 8     | 7   | 9     | 77   | 28  | 57    | 29 | 20  | 24 | 83   | 30 | 56   | 29 | 27  | 33 | 87   | 32 | 64   | 33 | 23   | 28 |
| Spain, Canary Islands                | 382      | 263      | 119      | 4    | 1   | 3     | 1     | 1   | 1     | 36    | 9   | 25    | 10    | 11  | 9     | 132  | 35  | 87    | 33 | 45  | 38 | 112  | 29 | 83   | 32 | 29  | 24 | 98   | 26 | 65   | 25 | 33   | 28 |
| Spain, Cantabria *                   | 70       | 51       | 19       |      |     |       |       |     |       | 7     | 10  | 5     | 10    | 2   | 11    | 18   | 26  | 12    | 24 | 6   | 32 | 30   | 43 | 21   | 41 | 9   | 47 | 15   | 21 | 13   | 25 | 2    | 11 |
| Spain, Castile and León * †          | 280      | 190      | 90       |      |     |       |       |     |       | 15    | 5   | 12    | 6     | 3   | 3     | 75   | 27  | 51    | 27 | 24  | 27 | 90   | 32 | 64   | 34 | 26  | 29 | 100  | 36 | 63   | 33 | 37   | 41 |
| Spain, Castile-La Mancha *           | 195      | 130      | 65       |      |     |       |       |     |       | 13    | 7   | 5     | 4     | 8   | 12    | 81   | 42  | 58    | 45 | 23  | 35 | 54   | 28 | 39   | 30 | 15  | 23 | 47   | 24 | 28   | 22 | 19   | 29 |
| Spain, Catalonia †                   | 1277     | 857      | 420      | 19   | 1   | 11    | 1     | 8   | 2     | 99    | 8   | 68    | 8     | 31  | 7     | 357  | 28  | 221   | 26 | 136 | 32 | 347  | 27 | 243  | 28 | 104 | 25 | 455  | 36 | 314  | 37 | 141  | 34 |
| Spain, Community of Madrid           | 714      | 489      | 225      | 7    | 1   | 4     | 1     | 3   | 1     | 85    | 12  | 55    | 11    | 30  | 13    | 220  | 31  | 158   | 32 | 62  | 28 | 186  | 26 | 129  | 26 | 57  | 25 | 216  | 30 | 143  | 29 | 73   | 32 |
| Spain, Extremadura                   | 143      | 100      | 43       | 0    | 0   | 0     | 0     | 0   | 0     | 7     | 5   | 6     | 6     | 1   | 2     | 56   | 39  | 39    | 39 | 17  | 40 | 41   | 29 | 29   | 12 | 28  | 39 | 27   | 26 | 26   | 13 | 30   |    |
| Spain, Galicia                       | 391      | 286      | 105      | 2    | 1   | 2     | 1     | 0   | 0     | 20    | 5   | 14    | 5     | 6   | 6     | 124  | 32  | 89    | 31 | 35  | 33 | 118  | 30 | 85   | 30 | 33  | 31 | 127  | 32 | 96   | 34 | 31   | 30 |
| Spain, La Rioja                      | 32       | 18       | 14       | 0    | 0   | 0     | 0     | 0   | 0     | 1     | 3   | 0     | 0     | 1   | 7     | 11   | 34  | 7     | 39 | 4   | 29 | 8    | 25 | 4    | 22 | 4   | 29 | 12   | 38 | 7    | 39 | 5    | 36 |
| Spain, Murcia                        | 201      | 140      | 61       | 2    | 1   | 1     | 1     | 1   | 2     | 18    | 9   | 11    | 8     | 7   | 11    | 68   | 34  | 48    | 34 | 20  | 33 | 58   | 29 | 44   | 31 | 14  | 23 | 55   | 27 | 36   | 26 | 19   | 31 |
| Spain, Navarre *                     | 69       | 45       | 24       |      |     |       |       |     |       | 15    | 22  | 6     | 13    | 9   | 38    | 17   | 25  | 12    | 27 | 5   | 21 | 17   | 25 | 13   | 29 | 4   | 17 | 20   | 29 | 14   | 31 | 6    | 25 |
| Spain, Valencian region †            | 753      | 513      | 240      | 3    | 0   | 2     | 0     | 1   | 0     | 63    | 8   | 51    | 10    | 12  | 5     | 225  | 30  | 147   | 29 | 78  | 33 | 208  | 28 | 147  | 29 | 61  | 25 | 254  | 34 | 165  | 32 | 88   | 37 |
| Sweden                               | 1039     | 713      | 326      | 23   | 2   | 14    | 2     | 9   | 3     | 135   | 13  | 90    | 13    | 45  | 14    | 288  | 28  | 194   | 27 | 94  | 29 | 286  | 28 | 203  | 28 | 83  | 25 | 307  | 30 | 212  | 30 | 95   | 29 |
| Switzerland †                        | 830      | 545      | 285      | 12   | 1   | 9     | 2     | 3   | 1     | 89    | 11  | 57    | 10    | 31  | 11    | 245  | 30  | 152   | 28 | 93  | 33 | 214  | 26 | 138  | 25 | 76  | 27 | 271  | 33 | 189  | 35 | 82   | 29 |
| the Netherlands ‡                    | 1762     | 1122     | 640      | 27   | 2   | 13    | 1     | 14  | 2     | 196   | 11  | 117   | 10    | 79  | 12    | 554  | 31  | 338   | 30 | 216 | 34 | 520  | 30 | 329  | 29 | 191 | 30 | 465  | 26 | 325  | 29 | 140  | 22 |
| United Kingdom, England † #          | 5701     | 3694     | 2007     | 128  | 2   | 72    | 2     | 56  | 3     | 840   | 15  | 517   | 14    | 323 | 16    | 2132 | 37  | 1387  | 38 | 745 | 37 | 1378 | 24 | 881  | 24 | 497 | 25 | 1223 | 21 | 838  | 23 | 385  | 19 |
| United Kingdom, Northern Ireland † # | 197      | 125      | 72       |      |     |       |       |     |       | 34    | 17  | 22    | 18    | 13  | 18    | 63   | 32  | 39    | 31 | 24  | 33 | 52   | 26 | 35   | 28 | 17  | 24 | 42   | 21 | 27   | 22 | 15   | 21 |
| United Kingdom, Scotland             | 511      | 316      | 195      | 9    | 2   | 6     | 2     | 3   | 2     | 83    | 16  | 54    | 17    | 29  | 15    | 189  | 37  | 115   | 36 | 74  | 38 | 130  | 25 | 89   | 28 | 41  | 21 | 100  | 20 | 52   | 16 | 48   | 25 |
| United Kingdom, Wales † #            | 344      | 224      | 120      | 8    | 2   |       |       |     |       | 55    | 16  | 34    | 15    | 21  | 18    | 109  | 32  | 61    | 27 | 48  | 40 | 96   | 28 | 66   | 29 | 31  | 26 | 76   | 22 | 60   | 27 | 16   | 13 |

Categories may not add up because of missing values or rounding off  
 § The incidence is underestimated by approximately 1% due to one hemodialysis centre not submitting data  
 \* Patients younger than 20 years of age are not reported  
 † The incident counts at day 91 are estimated (see methods)  
 ‡ The incidence is underestimated by approximately 7%  
 # Values based on 1 to 5 patients are suppressed

**B3 INCIDENT PATIENTS ACCEPTED FOR KRT IN 2020, AT DAY 91**

Table B.3.2  
**Incidence per million (age-related) population by age and sex, unadjusted**  
*at day 91*

|                                      | All   |       |       | 0-19  |       |       | 20-44 |       |       | 45-64 |       |       | 65-74 |       |       | 75+   |        |       |
|--------------------------------------|-------|-------|-------|-------|-------|-------|-------|-------|-------|-------|-------|-------|-------|-------|-------|-------|--------|-------|
|                                      | All   | Men   | Women | All   | Men    | Women |
|                                      | Pmp   | Pmp   | Pmp   | Pmarp  | Pmarp |
| Austria §                            | 104.9 | 141.1 | 69.9  | 7.0   | 9.0   | 4.8   | 34.8  | 40.7  | 28.7  | 111.0 | 158.2 | 64.5  | 304.0 | 442.6 | 182.7 | 326.4 | 504.7  | 206.4 |
| Belgium, Dutch-speaking *            | 157.3 | 201.7 | 113.8 |       |       |       | 27.4  | 35.0  | 19.8  | 135.0 | 174.8 | 94.6  | 370.4 | 493.8 | 252.9 | 735.0 | 1094.7 | 480.6 |
| Belgium, French-speaking *           | 158.7 | 200.2 | 118.8 |       |       |       | 33.2  | 40.4  | 26.0  | 177.3 | 222.8 | 132.0 | 546.0 | 719.4 | 395.4 | 633.2 | 1037.8 | 387.5 |
| Bosnia and Herzegovina               | 101.9 | 129.9 | 75.0  | 6.4   | 5.0   | 7.8   | 28.6  | 35.3  | 21.6  | 141.3 | 181.2 | 103.3 | 401.3 | 628.3 | 224.1 | 278.9 | 374.0  | 219.2 |
| Denmark                              | 114.3 | 152.5 | 76.4  | 6.9   | 6.0   | 7.8   | 36.2  | 53.2  | 18.7  | 138.2 | 184.8 | 91.4  | 313.7 | 435.3 | 199.1 | 341.5 | 496.7  | 223.6 |
| Estonia                              | 56.4  | 61.9  | 51.5  | 7.1   | 6.9   | 7.3   | 23.2  | 17.9  | 29.1  | 86.0  | 89.3  | 83.0  | 140.1 | 175.1 | 116.7 | 103.4 | 247.8  | 44.8  |
| Finland                              | 93.5  | 118.6 | 69.0  | 9.5   | 11.8  | 7.0   | 50.3  | 48.3  | 52.5  | 116.2 | 143.4 | 89.0  | 209.2 | 295.2 | 131.7 | 203.3 | 352.7  | 105.1 |
| France †                             | 146.4 | 197.5 | 98.5  | 7.0   | 8.3   | 5.7   | 45.5  | 57.6  | 33.6  | 144.6 | 189.3 | 102.1 | 385.2 | 548.7 | 242.4 | 540.5 | 915.7  | 300.4 |
| Greece                               | 230.2 | 317.0 | 148.0 | 5.8   | 7.5   | 4.0   | 36.2  | 48.9  | 23.2  | 182.8 | 256.2 | 115.5 | 557.8 | 845.0 | 309.4 | 926.3 | 1414.4 | 565.3 |
| Iceland                              | 95.5  | 117.0 | 72.8  | 11.0  | 21.5  | 0     | 29.8  | 42.2  | 15.8  | 91.2  | 44.8  | 139.2 | 257.3 | 449.0 | 64.5  | 627.1 | 897.1  | 406.7 |
| Montenegro * †                       | 95.0  | 134.5 | 56.2  |       |       |       | 52.2  | 55.9  | 48.4  | 176.8 | 252.6 | 104.4 | 232.3 | 416.5 | 79.2  | 138.2 | 255.2  | 61.1  |
| Norway                               | 97.2  | 130.5 | 63.4  | 10.5  | 12.5  | 8.3   | 37.4  | 53.3  | 20.7  | 125.1 | 157.7 | 91.0  | 260.5 | 368.6 | 154.7 | 309.8 | 486.9  | 176.7 |
| Romania                              | 125.7 | 153.0 | 99.5  | 7.0   | 8.6   | 5.3   | 48.4  | 59.1  | 37.0  | 187.1 | 235.8 | 138.7 | 356.9 | 464.2 | 274.9 | 217.6 | 323.7  | 157.0 |
| Serbia                               | 80.8  | 104.8 | 58.1  | 7.5   | 11.3  | 3.4   | 30.1  | 37.4  | 22.5  | 126.5 | 166.0 | 89.2  | 190.6 | 259.0 | 134.8 | 127.3 | 206.2  | 75.7  |
| Spain, Andalusia                     | 136.6 | 176.4 | 97.9  | 9.6   | 13.1  | 5.8   | 43.8  | 46.9  | 40.7  | 146.8 | 207.7 | 87.0  | 428.0 | 552.8 | 315.7 | 456.8 | 706.6  | 288.7 |
| Spain, Aragon                        | 133.0 | 200.9 | 66.8  | 12.0  | 7.8   | 16.6  | 50.3  | 74.2  | 25.6  | 136.9 | 185.3 | 87.3  | 334.2 | 488.9 | 194.0 | 355.2 | 769.3  | 77.0  |
| Spain, Asturias                      | 161.4 | 226.5 | 101.8 | 13.4  | 26.1  | 0     | 29.3  | 51.0  | 7.4   | 134.3 | 206.6 | 65.6  | 419.1 | 551.0 | 305.9 | 405.0 | 674.8  | 241.2 |
| Spain, Basque country                | 126.2 | 183.3 | 72.6  | 14.8  | 4.8   | 25.4  | 37.6  | 52.4  | 22.9  | 115.3 | 173.2 | 59.1  | 332.9 | 480.5 | 203.4 | 343.1 | 651.8  | 148.0 |
| Spain, Canary Islands                | 170.5 | 237.0 | 105.2 | 10.0  | 14.6  | 5.2   | 47.1  | 65.6  | 28.7  | 188.0 | 246.3 | 128.9 | 547.0 | 844.4 | 272.4 | 573.1 | 902.8  | 333.3 |
| Spain, Cantabria *                   | 120.1 | 179.5 | 63.6  |       |       |       | 41.6  | 58.7  | 24.0  | 99.3  | 133.7 | 65.6  | 447.9 | 665.1 | 254.2 | 234.0 | 527.3  | 50.7  |
| Spain, Castile and León * †          | 116.8 | 161.2 | 73.7  |       |       |       | 22.8  | 35.7  | 9.3   | 101.0 | 136.8 | 64.6  | 323.3 | 465.9 | 184.8 | 298.3 | 466.2  | 184.5 |
| Spain, Castile-La Mancha *           | 95.3  | 126.5 | 63.8  |       |       |       | 20.1  | 15.0  | 25.6  | 135.2 | 189.5 | 78.5  | 294.9 | 436.5 | 160.0 | 227.3 | 327.7  | 156.6 |
| Spain, Catalonia †                   | 164.2 | 223.9 | 106.3 | 11.9  | 13.2  | 10.5  | 38.9  | 52.4  | 24.9  | 163.4 | 202.9 | 124.2 | 467.0 | 706.5 | 260.1 | 627.3 | 1098.4 | 320.8 |
| Spain, Community of Madrid           | 105.3 | 150.7 | 63.6  | 5.2   | 5.8   | 4.5   | 37.2  | 49.0  | 25.8  | 114.0 | 171.0 | 61.7  | 303.4 | 471.1 | 168.0 | 362.6 | 625.5  | 198.9 |
| Spain, Extremadura                   | 134.4 | 190.0 | 80.0  | 0     | 0     | 0     | 21.5  | 36.2  | 6.3   | 174.8 | 240.8 | 107.3 | 390.3 | 565.4 | 223.2 | 330.0 | 553.6  | 182.5 |
| Spain, Galicia                       | 144.8 | 219.5 | 75.2  | 4.7   | 9.1   | 0     | 26.0  | 36.1  | 15.7  | 152.4 | 223.3 | 84.3  | 365.2 | 560.3 | 192.5 | 345.6 | 662.3  | 139.3 |
| Spain, La Rioja                      | 101.2 | 115.6 | 87.3  | 0     | 0     | 0     | 10.7  | 0     | 21.4  | 117.1 | 148.2 | 85.7  | 245.7 | 251.3 | 240.4 | 343.4 | 493.9  | 240.7 |
| Spain, Murcia                        | 133.0 | 185.0 | 80.8  | 5.8   | 5.7   | 6.0   | 35.1  | 41.6  | 28.2  | 162.7 | 227.7 | 96.5  | 469.0 | 754.3 | 214.3 | 481.2 | 776.7  | 279.6 |
| Spain, Navarre *                     | 105.0 | 138.6 | 72.2  |       |       |       | 75.4  | 59.8  | 91.2  | 89.0  | 124.5 | 52.9  | 260.1 | 411.3 | 118.5 | 301.3 | 521.1  | 151.8 |
| Spain, Valencian region †            | 148.9 | 205.7 | 93.7  | 3.0   | 3.9   | 2.1   | 39.4  | 63.2  | 14.8  | 151.8 | 199.5 | 104.6 | 407.0 | 612.7 | 225.8 | 538.9 | 867.3  | 315.3 |
| Sweden                               | 100.4 | 136.9 | 63.4  | 9.5   | 11.3  | 7.7   | 40.6  | 52.5  | 27.9  | 113.4 | 151.1 | 74.8  | 261.4 | 378.0 | 149.0 | 312.4 | 492.3  | 172.0 |
| Switzerland †                        | 96.1  | 127.2 | 65.5  | 6.8   | 9.8   | 3.6   | 30.9  | 39.4  | 22.1  | 100.8 | 124.6 | 76.8  | 257.0 | 345.8 | 175.5 | 345.3 | 581.2  | 178.1 |
| the Netherlands                      | 107.5 | 137.7 | 77.6  | 7.6   | 7.2   | 8.1   | 38.4  | 45.4  | 31.3  | 122.1 | 149.0 | 95.1  | 282.8 | 364.0 | 204.3 | 336.7 | 551.4  | 176.9 |
| United Kingdom, England † #          | 100.8 | 132.0 | 70.2  | 9.6   | 10.5  | 8.7   | 45.9  | 56.1  | 35.6  | 147.3 | 194.3 | 101.6 | 246.1 | 327.3 | 171.0 | 251.3 | 398.9  | 139.2 |
| United Kingdom, Northern Ireland † # | 103.8 | 133.8 | 74.5  |       |       |       | 57.1  | 72.3  | 42.0  | 129.2 | 164.1 | 95.8  | 302.9 | 417.2 | 195.1 | 283.1 | 433.7  | 172.7 |
| United Kingdom, Scotland             | 93.5  | 118.6 | 69.6  | 7.9   | 10.3  | 5.4   | 46.8  | 61.2  | 32.5  | 126.4 | 159.1 | 95.8  | 221.7 | 317.4 | 134.1 | 212.8 | 266.2  | 174.9 |
| United Kingdom, Wales † #            | 108.5 | 143.1 | 74.9  | 10.9  |       |       | 56.3  | 68.6  | 43.8  | 131.5 | 150.4 | 113.5 | 266.2 | 374.6 | 164.4 | 248.8 | 449.5  | 94.3  |

§ The incidence is underestimated by approximately 1% due to one hemodialysis centre not submitting data

\* Patients younger than 20 years of age are not reported

† The incident counts at day 91, on which the data presented in this table are based, are estimated (see methods)

# Values based on 1 to 5 patients are suppressed

Table B.3.3  
**Sex, mean age, and median age of incident patients**  
*at day 91*

|                                    | All |              |      |                |      |      | Men  |              |      |                |      |      | Women |              |      |                |      |      |
|------------------------------------|-----|--------------|------|----------------|------|------|------|--------------|------|----------------|------|------|-------|--------------|------|----------------|------|------|
|                                    | %   | Mean (years) | SD   | Median (years) | P25  | P75  | %    | Mean (years) | SD   | Median (years) | P25  | P75  | %     | Mean (years) | SD   | Median (years) | P25  | P75  |
| Austria                            | 100 | 64.8         | 16.1 | 68.2           | 56.3 | 76.8 | 66.2 | 64.6         | 15.8 | 67.2           | 56.2 | 76.3 | 33.8  | 65.2         | 16.7 | 70.1           | 56.6 | 77.8 |
| Belgium, Dutch-speaking *          | 100 | 71.0         | 13.7 | 73.7           | 63.1 | 81.6 | 63.5 | 70.8         | 13.6 | 73.4           | 62.3 | 81.2 | 36.5  | 71.4         | 13.8 | 74.4           | 63.6 | 82.3 |
| Belgium, French-speaking *         | 100 | 67.7         | 13.3 | 69.7           | 59.8 | 77.1 | 61.9 | 67.6         | 13.4 | 69.6           | 59.9 | 76.8 | 38.1  | 68.0         | 13.3 | 69.9           | 59.6 | 78.2 |
| Bosnia and Herzegovina             | 100 | 62.3         | 13.9 | 64.6           | 55.7 | 71.3 | 62.5 | 62.0         | 13.3 | 64.7           | 55.4 | 70.7 | 37.5  | 62.7         | 14.9 | 64.6           | 56.6 | 74.0 |
| Denmark                            | 100 | 64.3         | 15.6 | 67.1           | 55.1 | 75.7 | 66.4 | 63.8         | 15.4 | 66.4           | 54.5 | 75.2 | 33.6  | 65.4         | 16.0 | 67.7           | 56.9 | 76.5 |
| Estonia                            | 100 | 60.3         | 16.5 | 63.4           | 50.8 | 72.2 | 52.0 | 61.4         | 16.0 | 64.7           | 50.6 | 73.3 | 48.0  | 59.1         | 17.2 | 63.2           | 55.0 | 69.4 |
| Finland                            | 100 | 61.1         | 16.8 | 64.7           | 51.3 | 73.2 | 62.7 | 62.7         | 16.3 | 66.9           | 53.2 | 74.7 | 37.3  | 58.4         | 17.4 | 62.5           | 47.3 | 70.7 |
| France †                           | 100 | 67.2         | 16.0 | 70.3           | 58.9 | 78.8 | 65.2 | 67.5         | 15.8 | 70.5           | 59.7 | 78.8 | 34.8  | 66.7         | 16.4 | 69.8           | 57.8 | 78.7 |
| Greece                             | 100 | 70.9         | 14.1 | 73.8           | 63.7 | 81.6 | 67.0 | 70.7         | 13.9 | 73.4           | 63.7 | 81.1 | 33.0  | 71.4         | 14.5 | 74.4           | 63.4 | 82.7 |
| Iceland                            | 100 | 65.0         | 18.9 | 72.2           | 56.1 | 78.9 | 62.9 | 65.3         | 21.4 | 72.7           | 59.7 | 78.2 | 37.1  | 64.4         | 14.7 | 61.5           | 55.1 | 78.9 |
| Montenegro * †                     | 100 | 60.2         | 13.4 | 61.9           | 54.2 | 69.1 | 70.1 | 61.3         | 12.2 | 62.8           | 56.0 | 69.1 | 29.9  | 57.1         | 16.4 | 59.2           | 46.2 | 68.1 |
| Norway                             | 100 | 62.3         | 17.1 | 65.9           | 52.8 | 74.9 | 67.7 | 62.0         | 17.2 | 66.7           | 52.1 | 74.9 | 32.3  | 62.7         | 17.0 | 64.6           | 54.4 | 74.9 |
| Romania                            | 100 | 60.9         | 14.4 | 63.4           | 52.2 | 71.0 | 59.6 | 60.2         | 14.4 | 62.5           | 51.7 | 70.8 | 40.4  | 61.9         | 14.4 | 64.9           | 53.0 | 71.6 |
| Serbia                             | 100 | 60.4         | 14.2 | 63.1           | 52.4 | 70.1 | 63.1 | 60.3         | 14.6 | 62.7           | 53.4 | 70.1 | 36.9  | 60.7         | 13.5 | 63.6           | 51.0 | 69.9 |
| Spain, Andalusia                   | 100 | 64.5         | 15.7 | 67.6           | 56.5 | 76.2 | 63.7 | 64.6         | 15.5 | 67.1           | 56.6 | 75.9 | 36.3  | 64.3         | 16.1 | 68.4           | 56.1 | 76.4 |
| Spain, Aragon                      | 100 | 64.7         | 16.3 | 68.2           | 56.0 | 76.7 | 74.6 | 66.2         | 15.8 | 69.7           | 57.7 | 77.7 | 25.4  | 60.4         | 17.3 | 61.7           | 53.9 | 73.7 |
| Spain, Asturias                    | 100 | 67.2         | 15.3 | 69.7           | 61.6 | 77.0 | 67.1 | 65.8         | 16.4 | 68.8           | 59.8 | 76.7 | 32.9  | 70.0         | 12.6 | 70.1           | 66.0 | 77.3 |
| Spain, Basque country              | 100 | 65.4         | 15.9 | 69.0           | 57.6 | 76.5 | 70.3 | 66.5         | 14.6 | 70.0           | 59.2 | 76.8 | 29.7  | 62.9         | 18.6 | 67.9           | 56.4 | 75.5 |
| Spain, Canary Islands              | 100 | 64.2         | 14.8 | 66.8           | 56.0 | 75.2 | 68.8 | 64.2         | 14.8 | 67.2           | 55.4 | 75.0 | 31.2  | 64.3         | 14.7 | 65.4           | 56.4 | 75.4 |
| Spain, Cantabria *                 | 100 | 65.5         | 12.6 | 67.2           | 60.8 | 74.0 | 72.9 | 66.7         | 12.6 | 67.7           | 61.8 | 75.3 | 27.1  | 62.3         | 12.4 | 65.8           | 58.3 | 68.6 |
| Spain, Castile and León * †        | 100 | 69.0         | 12.9 | 71.0           | 62.3 | 79.0 | 67.9 | 68.5         | 13.1 | 69.9           | 62.3 | 79.0 | 32.1  | 70.1         | 12.6 | 72.9           | 62.5 | 78.9 |
| Spain, Castile-La Mancha *         | 100 | 65.2         | 13.1 | 66.6           | 55.3 | 74.9 | 66.7 | 65.6         | 11.4 | 66.0           | 58.6 | 74.2 | 33.3  | 64.5         | 15.9 | 66.9           | 52.5 | 77.7 |
| Spain, Catalonia †                 | 100 | 65.8         | 15.8 | 68.8           | 57.1 | 77.7 | 67.1 | 66.5         | 15.6 | 70.0           | 57.9 | 77.7 | 32.9  | 64.5         | 16.3 | 66.1           | 54.5 | 77.5 |
| Spain, Community of Madrid         | 100 | 64.6         | 15.9 | 68.1           | 55.3 | 76.6 | 68.5 | 64.5         | 15.6 | 67.9           | 55.3 | 76.1 | 31.5  | 64.8         | 16.5 | 68.9           | 55.4 | 77.4 |
| Spain, Extremadura                 | 100 | 66.0         | 12.2 | 66.9           | 57.5 | 75.4 | 69.9 | 65.4         | 12.5 | 66.1           | 57.6 | 75.3 | 30.1  | 67.4         | 11.6 | 67.8           | 57.4 | 76.5 |
| Spain, Galicia                     | 100 | 67.6         | 12.6 | 69.8           | 61.0 | 77.0 | 73.1 | 67.7         | 12.8 | 70.1           | 60.6 | 77.5 | 26.9  | 67.2         | 12.2 | 67.9           | 61.5 | 76.2 |
| Spain, La Rioja                    | 100 | 69.3         | 11.0 | 70.5           | 60.6 | 78.6 | 56.3 | 69.6         | 11.0 | 68.8           | 59.9 | 80.2 | 43.8  | 68.9         | 11.4 | 71.8           | 62.2 | 77.6 |
| Spain, Murcia                      | 100 | 65.0         | 14.1 | 67.0           | 58.3 | 75.4 | 69.7 | 64.9         | 13.7 | 66.7           | 57.6 | 75.2 | 30.3  | 65.2         | 15.2 | 67.5           | 60.3 | 77.0 |
| Spain, Navarre *                   | 100 | 63.6         | 15.9 | 68.9           | 54.9 | 76.3 | 65.2 | 66.5         | 13.7 | 70.3           | 62.3 | 77.1 | 34.8  | 57.9         | 18.3 | 64.5           | 37.5 | 75.0 |
| Spain, Valencian region †          | 100 | 66.6         | 14.0 | 70.2           | 58.5 | 77.0 | 68.1 | 66.0         | 14.3 | 69.4           | 58.5 | 76.8 | 31.9  | 67.8         | 13.2 | 71.5           | 58.0 | 77.6 |
| Sweden                             | 100 | 63.5         | 17.5 | 67.9           | 54.3 | 76.4 | 68.6 | 63.8         | 17.4 | 68.5           | 55.1 | 76.4 | 31.4  | 62.8         | 17.8 | 66.9           | 53.2 | 76.4 |
| Switzerland †                      | 100 | 65.2         | 16.3 | 68.6           | 57.2 | 77.3 | 65.7 | 65.6         | 16.9 | 69.8           | 58.2 | 77.7 | 34.3  | 64.5         | 15.1 | 67.1           | 55.6 | 76.0 |
| the Netherlands                    | 100 | 63.8         | 15.9 | 67.7           | 55.1 | 75.5 | 63.7 | 64.7         | 15.6 | 68.7           | 56.0 | 76.0 | 36.3  | 62.3         | 16.2 | 66.0           | 53.2 | 74.2 |
| United Kingdom, England †          | 100 | 60.7         | 16.9 | 63.2           | 50.8 | 73.7 | 64.8 | 61.3         | 16.7 | 63.8           | 51.4 | 74.1 | 35.2  | 59.5         | 17.2 | 62.4           | 49.2 | 72.8 |
| United Kingdom, Northern Ireland † | 100 | 59.2         | 18.1 | 63.2           | 47.8 | 72.7 | 63.6 | 59.4         | 17.8 | 63.4           | 49.0 | 72.9 | 36.4  | 58.9         | 18.6 | 62.7           | 47.5 | 72.7 |
| United Kingdom, Scotland           | 100 | 59.0         | 17.0 | 62.0           | 50.0 | 72.0 | 61.8 | 58.0         | 17.0 | 62.0           | 49.0 | 71.0 | 38.2  | 61.0         | 17.0 | 62.0           | 52.0 | 92.0 |
| United Kingdom, Wales †            | 100 | 61.7         | 17.3 | 65.8           | 52.1 | 74.7 | 65.0 | 62.8         | 17.3 | 68.0           | 53.2 | 75.4 | 35.0  | 59.1         | 17.3 | 63.2           | 50.0 | 71.6 |

Categories may not add up because of missing values or rounding off

\* Patients younger than 20 years of age are not reported

† The incident counts at day 91, on which the data presented in this table are based, are estimated (see methods)

Table B.3.4  
**Incidence per million population, adjusted**  
*at day 91, adjusted for age and sex*

|                                    | All   | Men   | Women |
|------------------------------------|-------|-------|-------|
|                                    | Pmp   | Pmp   | Pmp   |
| Austria §                          | 101.9 | 137.1 | 68.4  |
| Belgium, Dutch-speaking *          | 144.7 | 181.3 | 109.9 |
| Belgium, French-speaking *         | 171.0 | 217.1 | 127.1 |
| Bosnia and Herzegovina             | 112.3 | 146.2 | 80.0  |
| Denmark                            | 110.5 | 145.9 | 76.8  |
| Estonia                            | 57.1  | 66.3  | 48.3  |
| Finland                            | 88.1  | 110.4 | 66.8  |
| France †                           | 142.5 | 189.4 | 97.8  |
| Greece                             | 197.8 | 267.3 | 131.6 |
| Iceland                            | 116.2 | 138.3 | 95.1  |
| Montenegro * †                     | 98.2  | 141.6 | 56.8  |
| Norway                             | 100.2 | 133.5 | 68.3  |
| Romania                            | 124.5 | 155.2 | 95.1  |
| Serbia                             | 75.4  | 98.8  | 53.0  |
| Spain, Andalusia                   | 139.9 | 179.3 | 102.2 |
| Spain, Aragon                      | 121.2 | 181.0 | 64.2  |
| Spain, Asturias                    | 131.2 | 183.9 | 80.9  |
| Spain, Basque country              | 112.1 | 160.0 | 66.5  |
| Spain, Canary Islands              | 173.2 | 239.2 | 110.1 |
| Spain, Cantabria *                 | 107.0 | 158.0 | 58.4  |
| Spain, Castile and León * †        | 92.6  | 124.8 | 62.0  |
| Spain, Castile-La Mancha *         | 93.5  | 124.9 | 63.5  |
| Spain, Catalonia †                 | 164.5 | 224.4 | 107.4 |
| Spain, Community of Madrid         | 109.5 | 155.4 | 65.8  |
| Spain, Extremadura                 | 122.4 | 172.5 | 74.5  |
| Spain, Galicia                     | 119.6 | 178.3 | 63.6  |
| Spain, La Rioja                    | 93.1  | 103.2 | 83.3  |
| Spain, Murcia                      | 149.3 | 210.5 | 91.0  |
| Spain, Navarre *                   | 102.2 | 132.3 | 73.5  |
| Spain, Valencian region †          | 143.7 | 197.8 | 92.1  |
| Sweden                             | 97.7  | 131.9 | 65.2  |
| Switzerland †                      | 94.4  | 123.5 | 66.6  |
| the Netherlands                    | 103.1 | 130.3 | 77.2  |
| United Kingdom, England †          | 103.3 | 134.4 | 73.6  |
| United Kingdom, Northern Ireland † | 110.1 | 141.2 | 80.5  |
| United Kingdom, Scotland           | 92.3  | 115.6 | 70.0  |
| United Kingdom, Wales †            | 104.0 | 134.4 | 75.0  |

§ The incidence is underestimated by approximately 1% due to one hemodialysis centre not submitting data

\* Patients younger than 20 years of age are not reported

† The incident counts at day 91, on which the data presented in this table are based, are estimated (see methods)



Table B.3.5  
Incidence per million population and percentages by primary renal disease, unadjusted  
at day 91

|                                      | All   |     | GN   |      | PN   |      | PKD  |      | DM     |      |        |      |      |      | HT   |      | RVD  |      | Misc |      | Unkn |      | Missing |      |
|--------------------------------------|-------|-----|------|------|------|------|------|------|--------|------|--------|------|------|------|------|------|------|------|------|------|------|------|---------|------|
|                                      |       |     |      |      |      |      |      |      | Type 1 |      | Type 2 |      | Both |      |      |      |      |      |      |      |      |      |         |      |
|                                      | Pmp   | %   | Pmp  | %    | Pmp  | %    | Pmp  | %    | Pmp    | %    | Pmp    | %    | Pmp  | %    | Pmp  | %    | Pmp  | %    | Pmp  | %    | Pmp  | %    | Pmp     | %    |
| Austria §                            | 104.9 | 100 | 10.9 | 10.4 | 3.4  | 3.2  | 6.3  | 6.0  | 4.4    | 4.2  | 21.9   | 20.9 | 26.3 | 25.1 | 18.5 | 17.7 | 2.4  | 2.2  | 22.8 | 21.7 | 14.2 | 13.5 | 0.2     | 0.2  |
| Belgium, Dutch-speaking *            | 157.3 | 100 | 14.4 | 9.2  | 6.3  | 4.0  | 6.5  | 4.1  | 5.3    | 3.3  | 28.3   | 18.0 | 33.5 | 21.3 | 16.8 | 10.7 | 5.9  | 3.7  | 58.8 | 37.3 | 15.2 | 9.6  | 0       | 0    |
| Belgium, French-speaking *           | 158.7 | 100 | 12.1 | 7.6  | 6.3  | 4.0  | 6.3  | 4.0  | 2.2    | 1.4  | 37.2   | 23.5 | 39.5 | 24.9 | 26.2 | 16.5 | 1.6  | 1.0  | 38.4 | 24.2 | 28.2 | 17.8 | 0       | 0    |
| Bosnia and Herzegovina               | 101.9 | 100 | 9.9  | 9.7  | 10.5 | 10.3 | 6.8  | 6.7  | 6.5    | 6.4  | 21.5   | 21.1 | 28.0 | 27.5 | 13.3 | 13.1 | 2.3  | 2.2  | 12.7 | 12.5 | 18.4 | 18.1 | 0       | 0    |
| Denmark                              | 114.3 | 100 | 14.6 | 12.8 | 6.3  | 5.5  | 8.0  | 7.0  | 5.9    | 5.2  | 25.0   | 21.8 | 30.9 | 27.0 | 11.7 | 10.3 | 0.8  | 0.7  | 19.4 | 16.9 | 22.6 | 19.8 | 0       | 0    |
| Estonia                              | 56.4  | 100 | 7.5  | 13.3 | 3.8  | 6.7  | 6.8  | 12.0 |        |      |        |      | 13.5 | 24.0 | 14.3 | 25.3 | 0    | 0    | 10.5 | 18.7 | 0    | 0    | 0       | 0    |
| Finland                              | 93.5  | 100 | 12.3 | 13.2 | 5.4  | 5.8  | 9.0  | 9.7  | 14.1   | 15.1 | 17.2   | 18.4 | 31.3 | 33.5 | 7.1  | 7.5  | 0.2  | 0.2  | 13.4 | 14.3 | 14.8 | 15.9 | 0       | 0    |
| France †                             | 146.4 | 100 | 16.4 | 11.2 | 7.2  | 4.9  | 9.2  | 6.3  |        |      |        |      | 34.5 | 23.6 | 35.4 | 24.2 | 1.4  | 1.0  | 20.6 | 14.1 | 21.2 | 14.5 | 0.4     | 0.3  |
| Greece                               | 230.2 | 100 | 18.1 | 7.9  | 10.4 | 4.5  | 8.9  | 3.9  | 1.3    | 0.6  | 55.8   | 24.2 | 57.1 | 24.8 | 24.0 | 10.4 | 3.1  | 1.3  | 28.6 | 12.4 | 80.0 | 34.8 | 0       | 0    |
| Iceland                              | 95.5  | 100 | 13.6 | 14.3 | 2.7  | 2.9  | 5.5  | 5.7  | 2.7    | 2.9  | 8.2    | 8.6  | 10.9 | 11.4 | 30.0 | 31.4 | 2.7  | 2.9  | 24.6 | 25.7 | 5.5  | 5.7  | 0       | 0    |
| Montenegro * †                       | 95.0  | 100 | 9.7  | 10.2 | 1.6  | 1.7  | 1.6  | 1.7  | 11.3   | 11.9 | 11.3   | 11.9 | 22.5 | 23.7 | 18.8 | 19.8 | 0    | 0    | 15.6 | 16.4 | 25.2 | 26.6 | 0       | 0    |
| Norway                               | 97.2  | 100 | 17.3 | 17.8 | 3.3  | 3.4  | 8.4  | 8.6  | 3.7    | 3.8  | 12.1   | 12.4 | 15.8 | 16.3 | 29.0 | 29.8 | 0.7  | 0.8  | 19.3 | 19.9 | 3.0  | 3.1  | 0.4     | 0.4  |
| Romania                              | 125.7 | 100 | 13.2 | 10.5 | 5.0  | 4.0  | 3.6  | 2.8  |        |      |        |      | 16.0 | 12.7 | 9.2  | 7.3  | 0.8  | 0.6  | 21.3 | 16.9 | 56.7 | 45.1 | 0       | 0    |
| Serbia                               | 80.8  | 100 | 9.0  | 11.2 | 6.3  | 7.8  | 4.0  | 5.0  |        |      |        |      | 23.0 | 28.5 | 19.5 | 24.1 | 0.8  | 1.0  | 12.9 | 15.9 | 5.3  | 6.6  | 0       | 0    |
| Spain, Andalusia                     | 136.6 | 100 | 17.7 | 12.9 | 7.5  | 5.5  | 7.8  | 5.7  |        |      |        |      | 36.0 | 26.4 | 13.2 | 9.7  | 1.8  | 1.3  | 25.9 | 19.0 | 26.7 | 19.6 | 0       | 0    |
| Spain, Aragon                        | 133.0 | 100 | 27.1 | 20.3 | 6.8  | 5.1  | 3.8  | 2.8  | 3.0    | 2.3  | 30.8   | 23.2 | 33.8 | 25.4 | 16.5 | 12.4 | 0.8  | 0.6  | 14.3 | 10.7 | 30.1 | 22.6 | 0       | 0    |
| Spain, Asturias                      | 161.4 | 100 | 20.7 | 12.8 | 8.9  | 5.5  | 9.8  | 6.1  | 3.9    | 2.4  | 43.3   | 26.8 | 47.2 | 29.3 | 38.4 | 23.8 | 0    | 0    | 20.7 | 12.8 | 15.7 | 9.8  | 0       | 0    |
| Spain, Basque country                | 126.2 | 100 | 15.1 | 12.0 | 3.7  | 2.9  | 12.8 | 10.1 | 5.0    | 4.0  | 27.0   | 21.4 | 32.0 | 25.4 | 19.2 | 15.2 | 1.8  | 1.4  | 21.5 | 17.0 | 20.1 | 15.9 | 0       | 0    |
| Spain, Canary Islands                | 170.5 | 100 | 24.5 | 14.4 | 4.5  | 2.6  | 8.5  | 5.0  | 4.5    | 2.6  | 51.8   | 30.4 | 56.2 | 33.0 | 15.2 | 8.9  | 0.9  | 0.5  | 37.9 | 22.3 | 22.8 | 13.4 | 0       | 0    |
| Spain, Cantabria *                   | 120.1 | 100 | 20.6 | 17.1 | 3.4  | 2.9  | 12.0 | 10.0 | 0      | 0    | 34.3   | 28.6 | 34.3 | 28.6 | 13.7 | 11.4 | 1.7  | 1.4  | 17.2 | 14.3 | 10.3 | 8.6  | 6.9     | 5.7  |
| Spain, Castile and León * † ‡        | 116.8 | 100 | 17.0 | 14.5 | 4.9  | 4.2  | 9.6  | 8.2  | 4.2    | 3.6  | 25.1   | 21.5 | 29.2 | 25.0 | 15.0 | 12.9 | 0    | 0    | 23.2 | 19.9 | 17.8 | 15.3 | 0       | 0    |
| Spain, Castile-La Mancha *           | 95.3  | 100 | 10.3 | 10.8 | 10.3 | 10.8 | 6.8  | 7.2  |        |      |        |      | 28.8 | 30.3 | 2.9  | 3.1  | 3.4  | 3.6  | 13.7 | 14.4 | 19.1 | 20.0 | 0       | 0    |
| Spain, Catalonia †                   | 164.2 | 100 | 14.2 | 8.6  | 6.8  | 4.1  | 8.7  | 5.3  | 1.7    | 1.0  | 30.1   | 18.3 | 32.3 | 19.7 | 7.5  | 4.6  | 4.0  | 2.4  | 17.3 | 10.5 | 31.4 | 19.2 | 42.0    | 25.6 |
| Spain, Community of Madrid           | 105.3 | 100 | 15.5 | 14.7 | 3.4  | 3.2  | 8.8  | 8.4  | 1.6    | 1.5  | 26.3   | 24.9 | 27.9 | 26.5 | 11.7 | 11.1 | 1.8  | 1.7  | 30.4 | 28.9 | 5.9  | 5.6  | 0       | 0    |
| Spain, Extremadura                   | 134.4 | 100 | 17.9 | 13.3 | 8.5  | 6.3  | 8.5  | 6.3  |        |      |        |      | 42.3 | 31.5 | 3.8  | 2.8  | 4.7  | 3.5  | 9.4  | 7.0  | 39.5 | 29.4 | 0       | 0    |
| Spain, Galicia                       | 144.8 | 100 | 14.1 | 9.7  | 4.4  | 3.1  | 11.5 | 7.9  | 2.2    | 1.5  | 38.2   | 26.3 | 40.4 | 27.9 | 14.4 | 10.0 | 0.7  | 0.5  | 23.3 | 16.1 | 35.9 | 24.8 | 0       | 0    |
| Spain, La Rioja                      | 101.2 | 100 | 19.0 | 18.8 | 6.3  | 6.3  | 3.2  | 3.1  | 0      | 0    | 19.0   | 18.8 | 19.0 | 18.8 | 15.8 | 15.6 | 0    | 0    | 25.3 | 25.0 | 12.7 | 12.5 | 0       | 0    |
| Spain, Murcia                        | 133.0 | 100 | 17.2 | 12.9 | 7.3  | 5.5  | 9.9  | 7.5  | 5.3    | 4.0  | 25.1   | 18.9 | 30.4 | 22.9 | 11.9 | 9.0  | 1.3  | 1.0  | 30.4 | 22.9 | 24.5 | 18.4 | 0       | 0    |
| Spain, Navarre *                     | 105.0 | 100 | 13.7 | 13.0 | 1.5  | 1.4  | 4.6  | 4.3  | 7.6    | 7.2  | 32.0   | 30.4 | 39.6 | 37.7 | 9.1  | 8.7  | 0    | 0    | 18.3 | 17.4 | 18.3 | 17.4 | 0       | 0    |
| Spain, Valencian region †            | 148.9 | 100 | 14.8 | 9.9  | 5.2  | 3.5  | 9.1  | 6.1  |        |      |        |      | 33.2 | 22.3 | 28.4 | 19.1 | 0.6  | 0.4  | 30.2 | 20.3 | 27.5 | 18.5 | 0       | 0    |
| Sweden ‡                             | 100.4 | 100 | 16.0 | 16.0 | 3.4  | 3.4  | 7.1  | 7.0  | 5.1    | 5.1  | 18.7   | 18.7 | 23.9 | 23.8 | 19.7 | 19.6 | 0.8  | 0.8  | 20.3 | 20.2 | 9.3  | 9.2  | 0       | 0    |
| Switzerland †                        | 96.1  | 100 | 12.0 | 12.5 | 1.4  | 1.4  | 6.4  | 6.6  | 2.9    | 3.0  | 14.9   | 15.5 | 17.8 | 18.5 | 19.9 | 20.7 | 3.4  | 3.5  | 26.6 | 27.7 | 8.7  | 9.0  | 0       | 0    |
| the Netherlands                      | 107.5 | 100 | 10.8 | 10.0 | 2.9  | 2.7  | 5.2  | 4.8  | 3.2    | 3.0  | 19.6   | 18.2 | 22.8 | 21.2 | 16.1 | 15.0 | 10.7 | 10.0 | 19.3 | 17.9 | 11.2 | 10.4 | 8.5     | 7.9  |
| United Kingdom, England † #          | 100.8 | 100 | 10.6 | 10.5 | 5.3  | 5.3  | 5.6  | 5.5  |        |      |        |      | 27.2 | 27.0 | 7.0  | 6.9  | 1.1  | 1.1  | 17.8 | 17.6 | 13.2 | 13.1 | 13.1    | 13.0 |
| United Kingdom, Northern Ireland † # | 103.8 | 100 | 10.6 | 10.2 | 7.4  | 7.1  | 7.9  | 7.6  |        |      |        |      | 21.3 | 20.5 | 3.2  | 3.1  | 0    | 0    | 26.9 | 25.9 | 17.8 | 17.1 | 8.8     | 8.5  |
| United Kingdom, Scotland             | 93.5  | 100 | 15.2 | 16.2 | 4.4  | 4.7  | 7.5  | 8.0  |        |      |        |      | 26.5 | 28.4 | 2.7  | 2.9  | 1.5  | 1.6  | 24.0 | 25.6 | 11.5 | 12.3 | 0       | 0    |
| United Kingdom, Wales † #            | 108.5 | 100 | 18.8 | 17.3 | 7.0  | 6.5  | 6.9  | 6.4  |        |      |        |      | 28.6 | 26.4 | 4.1  | 3.8  |      |      | 31.4 | 29.0 | 10.0 | 9.2  |         |      |

Abbreviations used: GN: glomerulonephritis/sclerosis; PN: pyelonephritis; PKD: polycystic kidneys, adult type; DM: diabetes mellitus; HT: hypertension; RVD: renal vascular disease; Misc: miscellaneous; Unkn: unknown  
Categories may not add up because of rounding off or a limited number of cases (<10%) with diabetes mellitus type unknown; When cells are left empty, (complete) data are unavailable

§ The incidence is underestimated by approximately 1% due to one hemodialysis centre not submitting data

\* Patients younger than 20 years of age are not reported

† The incident counts at day 91, on which the data presented in this table are based, are estimated (see methods)

‡ Mapping the 2018 Primary Renal Disease (PRD) codes to the old PRD codes results in a different distribution of PRD groups

# Values based on 1 to 5 patients are suppressed

Table B.3.6  
Incidence per million population by primary renal disease, adjusted  
at day 91, adjusted for age and sex

|                                      | All   | GN   | PN   | PKD  | DM     |        |      | HT   | RVD | Misc | Unkn | Missing |
|--------------------------------------|-------|------|------|------|--------|--------|------|------|-----|------|------|---------|
|                                      | Pmp   | Pmp  | Pmp  | Pmp  | Type 1 | Type 2 | Both | Pmp  | Pmp | Pmp  | Pmp  | Pmp     |
|                                      |       |      |      |      | Pmp    | Pmp    | Pmp  |      |     |      |      |         |
| Austria §                            | 101.9 | 10.8 | 3.2  | 6.0  | 4.3    | 21.3   | 25.6 | 17.9 | 2.3 | 22.2 | 13.8 | 0.2     |
| Belgium, Dutch-speaking *            | 144.7 | 13.9 | 6.0  | 6.4  | 5.1    | 25.9   | 31.1 | 15.0 | 5.3 | 53.3 | 13.9 | 0       |
| Belgium, French-speaking *           | 171.0 | 13.0 | 6.8  | 6.7  | 2.3    | 40.1   | 42.4 | 28.6 | 1.7 | 41.0 | 30.8 | 0       |
| Bosnia and Herzegovina               | 112.3 | 10.3 | 12.7 | 6.7  | 7.2    | 23.6   | 30.8 | 14.5 | 2.5 | 14.2 | 20.8 | 0       |
| Denmark                              | 110.5 | 14.9 | 5.8  | 7.8  | 6.1    | 23.4   | 29.6 | 11.5 | 0.7 | 18.8 | 21.4 | 0       |
| Estonia                              | 57.1  | 8.0  | 4.1  | 6.5  |        |        | 13.8 | 14.2 | 0   | 10.5 | 0    | 0       |
| Finland                              | 88.1  | 12.3 | 5.0  | 8.7  | 14.4   | 15.3   | 29.7 | 6.3  | 0.1 | 12.6 | 13.5 | 0       |
| France †                             | 142.5 | 16.5 | 7.1  | 9.5  |        |        | 33.6 | 33.4 | 1.4 | 20.4 | 20.2 | 0.4     |
| Greece †                             | 197.8 | 16.9 | 9.1  | 8.1  | 1.3    | 47.7   | 49.0 | 20.4 | 2.5 | 24.7 | 67.1 | 0       |
| Iceland                              | 116.2 | 14.3 | 3.0  | 6.2  | 3.1    | 9.2    | 12.3 | 41.3 | 2.9 | 30.2 | 6.2  | 0       |
| Montenegro * †                       | 98.2  | 10.9 | 2.1  | 1.5  | 11.5   | 12.2   | 23.7 | 21.4 | 0   | 15.5 | 26.3 | 0       |
| Norway                               | 100.2 | 17.5 | 3.3  | 8.9  | 3.9    | 12.6   | 16.5 | 29.8 | 0.9 | 19.8 | 3.1  | 0.4     |
| Romania                              | 124.5 | 13.0 | 5.0  | 3.4  |        |        | 15.7 | 9.3  | 0.7 | 21.3 | 55.9 | 0       |
| Serbia                               | 75.4  | 8.7  | 5.9  | 3.8  |        |        | 21.4 | 17.9 | 0.8 | 12.1 | 4.9  | 0       |
| Spain, Andalusia                     | 139.9 | 17.8 | 7.6  | 7.6  |        |        | 36.9 | 13.6 | 1.9 | 26.8 | 27.6 | 0       |
| Spain, Aragon                        | 121.2 | 25.6 | 5.9  | 3.2  | 2.9    | 27.7   | 30.6 | 14.5 | 0.4 | 13.6 | 27.4 | 0       |
| Spain, Asturias                      | 131.2 | 19.3 | 7.6  | 7.8  | 3.1    | 33.3   | 36.4 | 28.4 | 0   | 18.9 | 12.7 | 0       |
| Spain, Basque country                | 112.1 | 14.1 | 3.5  | 11.4 | 4.8    | 22.8   | 27.6 | 17.0 | 1.5 | 19.3 | 17.8 | 0       |
| Spain, Canary Islands                | 173.2 | 24.5 | 4.5  | 7.4  | 4.1    | 53.3   | 57.4 | 15.8 | 1.0 | 38.9 | 23.6 | 0       |
| Spain, Cantabria *                   | 107.0 | 19.2 | 3.0  | 11.3 | 0      | 29.9   | 29.9 | 11.8 | 1.6 | 14.8 | 9.0  | 6.4     |
| Spain, Castile and León * † ‡        | 92.6  | 13.9 | 4.0  | 8.2  | 3.7    | 19.5   | 23.2 | 11.0 | 0   | 18.9 | 13.6 | 0       |
| Spain, Castile-La Mancha *           | 93.5  | 9.7  | 10.5 | 6.4  |        |        | 28.3 | 2.8  | 3.1 | 13.7 | 18.8 | 0       |
| Spain, Catalonia †                   | 164.5 | 14.1 | 6.7  | 8.5  | 1.6    | 30.7   | 32.8 | 7.4  | 4.0 | 17.3 | 31.7 | 42.1    |
| Spain, Community of Madrid           | 109.5 | 15.9 | 3.6  | 8.9  | 1.6    | 27.7   | 29.3 | 12.1 | 1.9 | 31.8 | 6.1  | 0       |
| Spain, Extremadura                   | 122.4 | 15.4 | 7.8  | 8.0  |        |        | 38.6 | 3.5  | 4.2 | 8.8  | 36.0 | 0       |
| Spain, Galicia                       | 119.6 | 12.5 | 3.6  | 9.9  | 2.1    | 31.1   | 33.3 | 11.5 | 0.6 | 20.0 | 28.2 | 0       |
| Spain, La Rioja                      | 93.1  | 17.4 | 5.8  | 3.0  | 0      | 17.5   | 17.5 | 14.8 | 0   | 22.2 | 12.3 | 0       |
| Spain, Murcia                        | 149.3 | 18.8 | 8.2  | 9.8  | 5.0    | 29.1   | 34.1 | 14.1 | 1.6 | 34.2 | 28.5 | 0       |
| Spain, Navarre *                     | 102.2 | 13.5 | 1.6  | 4.2  | 7.8    | 30.5   | 38.3 | 8.7  | 0   | 18.6 | 17.1 | 0       |
| Spain, Valencian region †            | 143.7 | 14.4 | 5.2  | 8.5  |        |        | 32.1 | 27.2 | 0.6 | 29.2 | 26.5 | 0       |
| Sweden ‡                             | 97.7  | 15.9 | 3.2  | 7.4  | 5.4    | 18.1   | 23.5 | 18.6 | 0.7 | 19.6 | 8.8  | 0       |
| Switzerland †                        | 94.4  | 11.8 | 1.4  | 6.3  | 2.8    | 14.7   | 17.5 | 19.4 | 3.2 | 26.2 | 8.5  | 0       |
| the Netherlands                      | 103.1 | 10.5 | 2.8  | 5.0  | 3.2    | 18.5   | 21.8 | 15.6 | 9.9 | 18.4 | 10.8 | 8.3     |
| United Kingdom, England † #          | 103.3 | 10.9 | 5.4  | 5.9  |        |        | 28.1 | 7.2  | 1.1 | 18.1 | 13.4 | 13.2    |
| United Kingdom, Northern Ireland † # | 110.1 | 11.5 | 7.9  | 8.4  |        |        | 22.6 | 3.4  | 0   | 28.6 | 18.8 | 9.3     |
| United Kingdom, Scotland             | 92.3  | 15.0 | 4.3  | 7.6  |        |        | 26.0 | 2.8  | 1.4 | 23.7 | 11.4 | 0       |
| United Kingdom, Wales † #            | 104.0 | 18.5 | 6.3  | 7.1  |        |        | 27.9 | 3.8  |     | 28.8 | 10.1 |         |

Abbreviations used: GN: glomerulonephritis/sclerosis; PN: pyelonephritis; PKD: polycystic kidneys, adult type; DM: diabetes mellitus; HT: hypertension; RVD: renal vascular disease; Misc: miscellaneous; Unkn: unknown  
Categories may not add up because of rounding off or a limited number of cases (<10%) with diabetes mellitus type unknown; When cells are left empty, (complete) data are unavailable

§ The incidence is underestimated by approximately 1% due to one hemodialysis centre not submitting data

\* Patients younger than 20 years of age are not reported

† The incident counts at day 91, on which the data presented in this table are based, are estimated (see methods)

‡ Mapping the 2018 Primary Renal Disease (PRD) codes to the old PRD codes results in a different distribution of PRD groups

# Values based on 1 to 5 patients are suppressed

Table B.3.7  
Incident counts by treatment modality  
at day 91

|                                      | All  | Haemodialysis      |         |              |    |      |                 | Peritoneal dialysis |      |              |          | Kidney transplant |                |              |          | Unkn | Missing |
|--------------------------------------|------|--------------------|---------|--------------|----|------|-----------------|---------------------|------|--------------|----------|-------------------|----------------|--------------|----------|------|---------|
|                                      |      | HD hospital/centre | HD home | HD type Unkn | HF | HDF  | Total HD/HF/HDF | APD                 | CAPD | PD type Unkn | Total PD | Living donor      | Deceased donor | Tx type Unkn | Total Tx |      |         |
|                                      |      | N                  | N       | N            | N  | N    | N               | N                   | N    | N            | N        | N                 | N              | N            | N        |      |         |
| Austria §                            | 934  | 701                | 0       | 0            | 3  | 105  | 809             | 39                  | 53   | 1            | 93       | 15                | 17             | 0            | 32       | 0    | 0       |
| Belgium, Dutch-speaking *            | 1047 | 608                | 3       | 0            | 0  | 321  | 932             | 63                  | 34   | 0            | 97       | 7                 | 11             | 0            | 18       | 0    | 0       |
| Belgium, French-speaking *           | 776  | 383                | 9       | 0            | 13 | 283  | 688             | 32                  | 46   | 0            | 78       | 3                 | 7              | 0            | 10       | 0    | 0       |
| Bosnia and Herzegovina               | 360  | 293                | 0       | 0            | 0  | 59   | 352             | 0                   | 8    | 0            | 8        | 0                 | 0              | 0            | 0        | 0    | 0       |
| Denmark                              | 673  | 379                | 1       | 0            |    |      | 380             | 109                 | 109  | 0            | 218      | 32                | 43             | 0            | 75       | 0    | 0       |
| Estonia                              | 75   | 56                 | 0       | 0            | 0  | 0    | 56              | 16                  | 0    | 0            | 16       | 0                 | 3              | 0            | 3        | 0    | 0       |
| Finland                              | 517  | 295                | 14      | 0            | 0  | 49   | 358             | 62                  | 69   | 0            | 131      | 12                | 15             | 1            | 28       | 0    | 0       |
| France †                             | 9880 | 6284               | 15      | 10           | 21 | 2070 | 8401            | 286                 | 774  | 2            | 1062     | 158               | 257            | 0            | 415      | 3    | 0       |
| Greece                               | 2463 | 2180               | 0       | 0            | 0  | 128  | 2308            | 52                  | 82   | 0            | 134      | 21                | 0              | 0            | 21       | 0    | 0       |
| Iceland                              | 35   | 22                 | 0       | 0            |    |      | 22              | 1                   | 7    | 0            | 8        | 2                 | 3              | 0            | 5        | 0    | 0       |
| Montenegro * †                       | 59   | 59                 | 0       | 0            | 0  | 0    | 59              | 0                   | 0    | 0            | 0        | 0                 | 0              | 0            | 0        | 0    | 0       |
| Norway                               | 523  | 309                | 2       | 0            |    |      | 311             |                     |      | 144          | 144      | 32                | 36             | 0            | 68       | 0    | 0       |
| Romania //                           | 2300 | 2208               | 0       | 0            | 0  | 32   | 2240            | 4                   | 47   | 0            | 51       | 5                 | 4              | 0            | 9        | 0    | 0       |
| Serbia                               | 502  | 416                | 0       | 0            | 7  | 21   | 444             | 4                   | 54   | 0            | 58       | 0                 | 0              | 0            | 0        | 0    | 0       |
| Spain, Andalusia                     | 1160 | 939                | 2       | 0            |    |      | 941             |                     |      | 148          | 148      | 17                | 54             | 0            | 71       | 0    | 0       |
| Spain, Aragon                        | 177  | 133                | 0       | 0            |    | 9    | 142             | 1                   | 25   | 0            | 26       | 4                 | 4              | 0            | 8        | 1    | 0       |
| Spain, Asturias                      | 164  | 125                | 0       | 0            |    | 0    | 125             | 8                   | 21   | 0            | 29       | 1                 | 9              | 0            | 10       | 0    | 0       |
| Spain, Basque country                | 276  | 186                | 2       | 0            |    |      | 188             | 6                   | 60   | 0            | 66       | 15                | 7              | 0            | 22       | 0    | 0       |
| Spain, Canary Islands                | 382  | 296                | 0       | 0            | 0  | 0    | 296             | 0                   | 0    | 76           | 76       | 2                 | 8              | 0            | 10       | 0    | 0       |
| Spain, Cantabria *                   | 70   | 50                 | 0       | 0            |    |      | 50              | 2                   | 10   | 0            | 12       | 0                 | 8              | 0            | 8        | 0    | 0       |
| Spain, Castile and León * †          | 280  | 231                | 1       | 0            |    |      | 233             | 16                  | 22   | 0            | 38       | 7                 | 2              | 0            | 9        | 0    | 0       |
| Spain, Castile-La Mancha *           | 195  | 149                | 0       | 0            |    |      | 149             | 5                   | 36   | 0            | 41       | 1                 | 4              | 0            | 5        | 0    | 0       |
| Spain, Catalonia †                   | 1277 | 425                | 3       | 0            |    | 574  | 1003            | 41                  | 126  | 0            | 166      | 57                | 52             | 0            | 108      | 0    | 0       |
| Spain, Community of Madrid           | 714  | 549                | 5       | 0            |    |      | 558             | 44                  | 83   | 0            | 127      | 10                | 19             | 0            | 29       | 0    | 0       |
| Spain, Extremadura                   | 143  | 125                | 0       | 0            |    |      | 125             | 10                  | 7    | 0            | 17       | 0                 | 1              | 0            | 1        | 0    | 0       |
| Spain, Galicia                       | 391  | 294                | 4       | 0            | 0  | 0    | 298             | 8                   | 75   | 0            | 83       | 7                 | 1              | 2            | 10       | 0    | 0       |
| Spain, La Rioja                      | 32   | 23                 | 0       | 0            | 0  | 0    | 23              | 1                   | 8    | 0            | 9        | 0                 | 0              | 0            | 0        | 0    | 0       |
| Spain, Murcia                        | 201  | 115                | 0       | 0            | 0  | 48   | 163             | 2                   | 34   | 0            | 36       | 1                 | 1              | 0            | 2        | 0    | 0       |
| Spain, Navarre *                     | 69   | 45                 | 5       | 0            |    |      | 50              | 15                  | 3    | 0            | 18       | 0                 | 1              | 0            | 1        | 0    | 0       |
| Spain, Valencian region †            | 753  | 576                | 7       | 0            |    |      | 583             | 15                  | 108  | 0            | 123      | 7                 | 40             | 0            | 47       | 0    | 0       |
| Sweden                               | 1039 | 573                | 2       | 0            |    |      | 575             |                     |      | 369          | 369      | 41                | 54             | 0            | 95       | 0    | 0       |
| Switzerland †                        | 830  | 639                | 10      | 12           | 19 | 0    | 680             | 39                  | 64   | 2            | 105      | 30                | 15             | 0            | 45       | 0    | 0       |
| the Netherlands ‡                    | 1762 | 1104               | 4       | 0            |    | 71   | 1179            | 163                 | 181  | 0            | 344      | 201               | 38             | 0            | 239      | 0    | 0       |
| United Kingdom, England † #          | 5701 | 3185               | 37      |              |    | 730  | 3957            | 669                 | 678  | 20           | 1367     | 150               | 217            | 9            | 376      |      | 0       |
| United Kingdom, Northern Ireland † # | 197  | 136                |         | 0            | 0  | 0    | 137             | 11                  |      | 0            | 16       | 11                | 32             | 0            | 43       | 0    | 0       |
| United Kingdom, Scotland             | 511  | 364                | 0       | 0            |    |      | 364             | 0                   | 0    | 0            | 101      | 0                 | 0              | 0            | 46       | 0    | 0       |
| United Kingdom, Wales † #            | 344  | 221                |         | 0            | 0  | 24   | 247             | 31                  | 47   |              | 79       | 10                | 8              | 0            | 17       | 0    | 0       |

Abbreviations used: HD: haemodialysis; Unkn: unknown; HF: haemofiltration; HDF: haemodiafiltration; APD: automated peritoneal dialysis; CAPD: continuous ambulatory peritoneal dialysis; PD: peritoneal dialysis; Tx: transplant  
Categories may not add up because of rounding off; When cells are left empty, (complete) data are unavailable

§ The incidence is underestimated by approximately 1% due to an estimated 1.2% underestimation of the incidence of haemodialysis

\* Patients younger than 20 years of age are not reported

† The incident counts at day 91 are estimated (see methods)

// The incidence of pre-emptive transplantation is underestimated by approximately 30%

‡ The incidence is underestimated by approximately 7%

# Values based on 1 to 5 patients are suppressed

Table B.3.8  
Incidence per million population by treatment modality, unadjusted  
at day 91

|                                      | Incidence per million population by treatment modality, unadjusted at day 91 |                    |         |              |     |       |                 |                     |      |              |          |                   |                |              |          |      |         |
|--------------------------------------|------------------------------------------------------------------------------|--------------------|---------|--------------|-----|-------|-----------------|---------------------|------|--------------|----------|-------------------|----------------|--------------|----------|------|---------|
|                                      | All                                                                          | Haemodialysis      |         |              |     |       |                 | Peritoneal dialysis |      |              |          | Kidney transplant |                |              |          | Unkn | Missing |
|                                      | Pmp                                                                          | HD hospital/centre | HD home | HD type Unkn | HF  | HDF   | Total HD/HF/HDF | APD                 | CAPD | PD type Unkn | Total PD | Living donor      | Deceased donor | Tx type Unkn | Total Tx | Pmp  | Pmp     |
| Austria §                            | 104.9                                                                        | 78.8               | 0       | 0            | 0.3 | 11.8  | 90.9            | 4.4                 | 6.0  | 0.1          | 10.4     | 1.7               | 1.9            | 0            | 3.6      | 0    | 0       |
| Belgium, Dutch-speaking *            | 157.3                                                                        | 91.4               | 0.5     | 0            | 0   | 48.2  | 140.1           | 9.5                 | 5.1  | 0            | 14.6     | 1.1               | 1.7            | 0            | 2.7      | 0    | 0       |
| Belgium, French-speaking *           | 158.7                                                                        | 78.3               | 1.8     | 0            | 2.7 | 57.9  | 140.7           | 6.5                 | 9.4  | 0            | 16.0     | 0.6               | 1.4            | 0            | 2.0      | 0    | 0       |
| Bosnia and Herzegovina               | 101.9                                                                        | 83.0               | 0       | 0            | 0   | 16.7  | 99.7            | 0                   | 2.3  | 0            | 2.3      | 0                 | 0              | 0            | 0        | 0    | 0       |
| Denmark                              | 114.3                                                                        | 64.4               | 0.2     | 0            |     | 64.5  | 64.5            | 18.5                | 18.5 | 0            | 37.0     | 5.4               | 7.3            | 0            | 12.7     | 0    | 0       |
| Estonia                              | 56.4                                                                         | 42.1               | 0       | 0            | 0   | 0     | 42.1            | 12.0                | 0    | 0            | 12.0     | 0                 | 2.3            | 0            | 2.3      | 0    | 0       |
| Finland                              | 93.5                                                                         | 53.3               | 2.5     | 0            | 0   | 8.9   | 64.7            | 11.2                | 12.5 | 0            | 23.7     | 2.2               | 2.7            | 0.2          | 5.1      | 0    | 0       |
| France †                             | 146.4                                                                        | 93.1               | 0.2     | 0.2          | 0.3 | 30.7  | 124.5           | 4.2                 | 11.5 | 0            | 15.7     | 2.3               | 3.8            | 0            | 6.1      | 0    | 0       |
| Greece                               | 230.2                                                                        | 203.8              | 0       | 0            | 0   | 12.0  | 215.7           | 4.9                 | 7.7  | 0            | 12.5     | 2.0               | 0              | 0            | 2.0      | 0    | 0       |
| Iceland                              | 95.5                                                                         | 60.0               | 0       | 0            |     | 60.0  | 60.0            | 2.7                 | 19.1 | 0            | 21.8     | 5.5               | 8.2            | 0            | 13.6     | 0    | 0       |
| Montenegro * †                       | 95.0                                                                         | 95.0               | 0       | 0            | 0   | 0     | 95.0            | 0                   | 0    | 0            | 0        | 0                 | 0              | 0            | 0        | 0    | 0       |
| Norway                               | 97.2                                                                         | 57.4               | 0.4     | 0            |     | 57.8  | 57.8            |                     |      | 26.8         | 26.8     | 5.9               | 6.7            | 0            | 12.6     | 0    | 0       |
| Romania //                           | 125.7                                                                        | 120.6              | 0       | 0            | 0   | 1.7   | 122.4           | 0.2                 | 2.6  | 0            | 2.8      | 0.3               | 0.2            | 0            | 0.5      | 0    | 0       |
| Serbia                               | 80.8                                                                         | 67.0               | 0       | 0            | 1.1 | 3.4   | 71.5            | 0.6                 | 8.7  | 0            | 9.3      | 0                 | 0              | 0            | 0        | 0    | 0       |
| Spain, Andalusia                     | 136.6                                                                        | 110.6              | 0.2     | 0            |     | 110.8 | 110.8           |                     |      | 17.4         | 17.4     | 2.0               | 6.4            | 0            | 8.4      | 0    | 0       |
| Spain, Aragon                        | 133.0                                                                        | 99.9               | 0       | 0            |     | 6.8   | 106.7           | 0.8                 | 18.8 | 0            | 19.5     | 3.0               | 3.0            | 0            | 6.0      | 0.8  | 0       |
| Spain, Asturias                      | 161.4                                                                        | 123.0              | 0       | 0            |     | 0     | 123.0           | 7.9                 | 20.7 | 0            | 28.5     | 1.0               | 8.9            | 0            | 9.8      | 0    | 0       |
| Spain, Basque country                | 126.2                                                                        | 85.0               | 0.9     | 0            |     | 85.9  | 85.9            | 2.7                 | 27.4 | 0            | 30.2     | 6.9               | 3.2            | 0            | 10.1     | 0    | 0       |
| Spain, Canary Islands                | 170.5                                                                        | 132.1              | 0       | 0            | 0   | 0     | 132.1           | 0                   | 0    | 33.9         | 33.9     | 0.9               | 3.6            | 0            | 4.5      | 0    | 0       |
| Spain, Cantabria *                   | 120.1                                                                        | 85.8               | 0       | 0            |     | 85.8  | 85.8            | 3.4                 | 17.2 | 0            | 20.6     | 0                 | 13.7           | 0            | 13.7     | 0    | 0       |
| Spain, Castile and León * †          | 116.8                                                                        | 96.6               | 0.6     | 0            |     | 97.2  | 97.2            | 6.8                 | 9.0  | 0            | 15.9     | 2.9               | 0.8            | 0            | 3.8      | 0    | 0       |
| Spain, Castile-La Mancha *           | 95.3                                                                         | 72.8               | 0       | 0            |     | 72.8  | 72.8            | 2.4                 | 17.6 | 0            | 20.0     | 0.5               | 2.0            | 0            | 2.4      | 0    | 0       |
| Spain, Catalonia †                   | 164.2                                                                        | 54.7               | 0.4     | 0            |     | 73.8  | 128.9           | 5.2                 | 16.2 | 0            | 21.4     | 7.3               | 6.6            | 0            | 13.9     | 0    | 0       |
| Spain, Community of Madrid           | 105.3                                                                        | 81.0               | 0.7     | 0            |     | 82.3  | 82.3            | 6.5                 | 12.2 | 0            | 18.7     | 1.5               | 2.8            | 0            | 4.3      | 0    | 0       |
| Spain, Extremadura                   | 134.4                                                                        | 117.5              | 0       | 0            |     | 117.5 | 117.5           | 9.4                 | 6.6  | 0            | 16.0     | 0                 | 0.9            | 0            | 0.9      | 0    | 0       |
| Spain, Galicia                       | 144.8                                                                        | 108.9              | 1.5     | 0            | 0   | 0     | 110.4           | 3.0                 | 27.8 | 0            | 30.7     | 2.6               | 0.4            | 0.7          | 3.7      | 0    | 0       |
| Spain, La Rioja                      | 101.2                                                                        | 72.8               | 0       | 0            | 0   | 0     | 72.8            | 3.2                 | 25.3 | 0            | 28.5     | 0                 | 0              | 0            | 0        | 0    | 0       |
| Spain, Murcia                        | 133.0                                                                        | 76.1               | 0       | 0            | 0   | 31.8  | 107.9           | 1.3                 | 22.5 | 0            | 23.8     | 0.7               | 0.7            | 0            | 1.3      | 0    | 0       |
| Spain, Navarre *                     | 105.0                                                                        | 68.5               | 7.6     | 0            |     | 76.1  | 76.1            | 22.8                | 4.6  | 0            | 27.4     | 0                 | 1.5            | 0            | 1.5      | 0    | 0       |
| Spain, Valencian region †            | 148.9                                                                        | 113.9              | 1.4     | 0            |     | 113.9 | 113.9           | 3.0                 | 21.3 | 0            | 24.3     | 1.5               | 7.8            | 0            | 9.3      | 0    | 0       |
| Sweden                               | 100.4                                                                        | 55.3               | 0.2     | 0            |     | 55.5  | 55.5            |                     |      | 35.6         | 35.6     | 4.0               | 5.2            | 0            | 9.2      | 0    | 0       |
| Switzerland †                        | 96.1                                                                         | 74.0               | 1.2     | 1.4          | 2.2 | 0     | 78.7            | 4.6                 | 7.4  | 0.2          | 12.2     | 3.5               | 1.7            | 0            | 5.2      | 0    | 0       |
| the Netherlands                      | 107.5                                                                        | 67.3               | 0.2     | 0            |     | 4.3   | 71.9            | 9.9                 | 11.0 | 0            | 21.0     | 12.3              | 2.3            | 0            | 14.6     | 0    | 0       |
| United Kingdom, England † #          | 100.8                                                                        | 56.3               | 0.7     |              |     | 12.9  | 70.0            | 11.8                | 12.0 | 0.3          | 24.2     | 2.6               | 3.8            | 0.2          | 6.6      | 0    | 0       |
| United Kingdom, Northern Ireland † # | 103.8                                                                        | 71.6               |         | 0            | 0   | 0     | 72.5            | 5.8                 |      | 0            | 8.4      | 5.8               | 17.1           | 0            | 22.9     | 0    | 0       |
| United Kingdom, Scotland             | 93.5                                                                         | 66.6               | 0       | 0            |     | 66.6  | 66.6            | 0                   | 0    | 0            | 18.5     | 0                 | 0              | 0            | 8.4      | 0    | 0       |
| United Kingdom, Wales † #            | 108.5                                                                        | 69.8               |         | 0            | 0   | 7.6   | 78.0            | 9.8                 | 14.8 |              | 25.0     | 3.0               | 2.4            | 0            | 5.5      | 0    | 0       |

Abbreviations used: HD: haemodialysis; Unkn: unknown; HF: haemofiltration; HDF: haemodiafiltration; APD: automated peritoneal dialysis; CAPD: continuous ambulatory peritoneal dialysis; PD: peritoneal dialysis; Tx: transplant  
Categories may not add up because of rounding off; When cells are left empty, (complete) data are unavailable

§ The incidence is underestimated by approximately 1% due to an estimated 1.2% underestimation of the incidence of haemodialysis

\* Patients younger than 20 years of age are not reported

† The incident counts at day 91, on which the data presented in this table are based, are estimated (see methods)

// The incidence of pre-emptive transplantation is underestimated by approximately 30%

# Values based on 1 to 5 patients are suppressed

Table B.3.9  
Incidence per million population by treatment modality, adjusted  
at day 91, adjusted for age and sex

|                                      | Incidence per million population by treatment modality, adjusted at day 91, adjusted for age and sex |                    |         |              |     |       |                 |                     |      |              |          |                   |                |              |          |      |         |
|--------------------------------------|------------------------------------------------------------------------------------------------------|--------------------|---------|--------------|-----|-------|-----------------|---------------------|------|--------------|----------|-------------------|----------------|--------------|----------|------|---------|
|                                      | All                                                                                                  | Haemodialysis      |         |              |     |       |                 | Peritoneal dialysis |      |              |          | Kidney transplant |                |              |          | Unkn | Missing |
|                                      | Pmp                                                                                                  | HD hospital/centre | HD home | HD type Unkn | HF  | HDF   | Total HD/HF/HDF | APD                 | CAPD | PD type Unkn | Total PD | Living donor      | Deceased donor | Tx type Unkn | Total Tx | Pmp  | Pmp     |
| Austria §                            | 101.9                                                                                                | 76.3               | 0       | 0            | 0.3 | 11.5  | 88.1            | 4.3                 | 5.8  | 0.1          | 10.2     | 1.7               | 1.9            | 0            | 3.6      | 0    | 0       |
| Belgium, Dutch-speaking *            | 144.7                                                                                                | 83.4               | 0.5     | 0            | 0   | 44.5  | 128.3           | 9.1                 | 4.7  | 0            | 13.8     | 1.1               | 1.6            | 0            | 2.6      | 0    | 0       |
| Belgium, French-speaking *           | 171.0                                                                                                | 84.2               | 1.9     | 0            | 2.8 | 63.0  | 151.9           | 6.9                 | 10.1 | 0            | 17.0     | 0.7               | 1.5            | 0            | 2.1      | 0    | 0       |
| Bosnia and Herzegovina               | 112.3                                                                                                | 91.8               | 0       | 0            | 0   | 18.2  | 110.0           | 0                   | 2.3  | 0            | 2.3      | 0                 | 0              | 0            | 0        | 0    | 0       |
| Denmark                              | 110.5                                                                                                | 62.0               | 0.2     | 0            |     | 62.2  | 62.2            | 17.9                | 17.9 | 0            | 35.8     | 5.4               | 7.1            | 0            | 12.5     | 0    | 0       |
| Estonia                              | 57.1                                                                                                 | 42.5               | 0       | 0            | 0   | 0     | 42.5            | 12.1                | 0    | 0            | 12.1     | 0                 | 2.4            | 0            | 2.4      | 0    | 0       |
| Finland                              | 88.1                                                                                                 | 49.3               | 2.7     | 0            | 0   | 8.5   | 60.5            | 11.2                | 11.2 | 0            | 22.5     | 2.2               | 2.8            | 0.2          | 5.2      | 0    | 0       |
| France †                             | 142.5                                                                                                | 90.4               | 0.2     | 0.1          | 0.3 | 29.6  | 120.7           | 4.2                 | 11.0 | 0            | 15.3     | 2.5               | 4.0            | 0            | 6.5      | 0    | 0       |
| Greece                               | 197.8                                                                                                | 173.5              | 0       | 0            | 0   | 11.0  | 184.6           | 4.4                 | 6.8  | 0            | 11.2     | 2.0               | 0              | 0            | 2.0      | 0    | 0       |
| Iceland                              | 116.2                                                                                                | 75.7               | 0       | 0            |     | 75.7  | 75.7            | 4.3                 | 20.5 | 0            | 24.8     | 6.4               | 9.3            | 0            | 15.7     | 0    | 0       |
| Montenegro * †                       | 98.2                                                                                                 | 98.2               | 0       | 0            | 0   | 0     | 98.2            | 0                   | 0    | 0            | 0        | 0                 | 0              | 0            | 0        | 0    | 0       |
| Norway                               | 100.2                                                                                                | 59.5               | 0.4     | 0            |     | 59.9  | 59.9            |                     |      | 27.5         | 27.5     | 5.9               | 6.8            | 0            | 12.8     | 0    | 0       |
| Romania //                           | 124.5                                                                                                | 119.5              | 0       | 0            | 0   | 1.7   | 121.2           | 0.2                 | 2.5  | 0            | 2.7      | 0.3               | 0.2            | 0            | 0.5      | 0    | 0       |
| Serbia                               | 75.4                                                                                                 | 62.2               | 0       | 0            | 1.0 | 3.2   | 66.4            | 0.7                 | 8.3  | 0            | 9.0      | 0                 | 0              | 0            | 0        | 0    | 0       |
| Spain, Andalusia                     | 139.9                                                                                                | 113.7              | 0.2     | 0            |     | 114.0 | 114.0           |                     |      | 17.7         | 17.7     | 1.9               | 6.3            | 0            | 8.2      | 0    | 0       |
| Spain, Aragon                        | 121.2                                                                                                | 90.3               | 0       | 0            |     | 6.3   | 96.6            | 0.7                 | 17.2 | 0            | 17.9     | 2.9               | 3.0            | 0            | 5.9      | 0.8  | 0       |
| Spain, Asturias                      | 131.2                                                                                                | 97.6               | 0       | 0            |     | 0     | 97.6            | 8.3                 | 16.3 | 0            | 24.7     | 0.8               | 8.1            | 0            | 8.9      | 0    | 0       |
| Spain, Basque country                | 112.1                                                                                                | 75.3               | 0.8     | 0            |     | 76.1  | 76.1            | 2.3                 | 24.2 | 0            | 26.4     | 6.6               | 3.0            | 0            | 9.6      | 0    | 0       |
| Spain, Canary Islands                | 173.2                                                                                                | 134.7              | 0       | 0            | 0   | 0     | 134.7           | 0                   | 0    | 34.1         | 34.1     | 0.9               | 3.5            | 0            | 4.3      | 0    | 0       |
| Spain, Cantabria *                   | 107.0                                                                                                | 74.9               | 0       | 0            |     | 74.9  | 74.9            | 3.3                 | 16.1 | 0            | 19.4     | 0                 | 12.7           | 0            | 12.7     | 0    | 0       |
| Spain, Castile and León * †          | 92.6                                                                                                 | 75.9               | 0.5     | 0            |     | 76.4  | 76.4            | 5.4                 | 7.7  | 0            | 12.9     | 2.7               | 0.7            | 0            | 3.5      | 0    | 0       |
| Spain, Castile-La Mancha *           | 93.5                                                                                                 | 71.4               | 0       | 0            |     | 71.4  | 71.4            | 2.4                 | 17.1 | 0            | 19.5     | 0.5               | 2.1            | 0            | 2.6      | 0    | 0       |
| Spain, Catalonia †                   | 164.5                                                                                                | 55.5               | 0.4     | 0            |     | 73.6  | 129.2           | 5.1                 | 16.3 | 0            | 21.4     | 7.1               | 6.8            | 0            | 13.9     | 0    | 0       |
| Spain, Community of Madrid           | 109.5                                                                                                | 84.7               | 0.8     | 0            |     | 86.2  | 86.2            | 6.5                 | 12.6 | 0            | 19.1     | 1.4               | 2.9            | 0            | 4.3      | 0    | 0       |
| Spain, Extremadura                   | 122.4                                                                                                | 106.1              | 0       | 0            |     | 106.1 | 106.1           | 8.8                 | 6.5  | 0            | 15.3     | 0                 | 1.0            | 0            | 1.0      | 0    | 0       |
| Spain, Galicia                       | 119.6                                                                                                | 89.0               | 1.2     | 0            | 0   | 0     | 90.2            | 2.8                 | 22.9 | 0            | 25.7     | 2.5               | 0.3            | 0.8          | 3.6      | 0    | 0       |
| Spain, La Rioja                      | 93.1                                                                                                 | 66.5               | 0       | 0            | 0   | 0     | 66.5            | 2.8                 | 23.7 | 0            | 26.6     | 0                 | 0              | 0            | 0        | 0    | 0       |
| Spain, Murcia                        | 149.3                                                                                                | 87.4               | 0       | 0            | 0   | 35.2  | 122.6           | 1.4                 | 24.1 | 0            | 25.5     | 0.6               | 0.7            | 0            | 1.3      | 0    | 0       |
| Spain, Navarre *                     | 102.2                                                                                                | 67.2               | 7.4     | 0            |     | 74.6  | 74.6            | 21.6                | 4.5  | 0            | 26.1     | 0                 | 1.6            | 0            | 1.6      | 0    | 0       |
| Spain, Valencian region †            | 143.7                                                                                                | 109.9              | 1.3     | 0            |     | 111.3 | 111.3           | 2.8                 | 20.5 | 0            | 23.4     | 1.5               | 7.6            | 0            | 9.2      | 0    | 0       |
| Sweden                               | 97.7                                                                                                 | 53.5               | 0.2     | 0            |     | 53.7  | 53.7            |                     |      | 34.6         | 34.6     | 4.0               | 5.4            | 0            | 9.5      | 0    | 0       |
| Switzerland †                        | 94.4                                                                                                 | 72.5               | 1.3     | 1.4          | 2.2 | 0     | 77.2            | 4.5                 | 7.3  | 0.2          | 12.0     | 3.4               | 1.8            | 0            | 5.2      | 0    | 0       |
| the Netherlands                      | 103.1                                                                                                | 64.3               | 0.3     | 0            |     | 4.2   | 68.7            | 9.6                 | 10.4 | 0            | 20.0     | 12.1              | 2.3            | 0            | 14.4     | 0    | 0       |
| United Kingdom, England † #          | 103.3                                                                                                | 57.8               | 0.7     |              |     | 13.1  | 71.7            | 12.1                | 12.3 | 0.3          | 24.7     | 2.7               | 4.0            | 0.1          | 6.9      | 0    | 0       |
| United Kingdom, Northern Ireland † # | 110.1                                                                                                | 76.6               |         | 0            | 0   | 0     | 77.0            | 6.5                 |      | 0            | 9.5      | 5.7               | 18.1           | 0            | 23.8     | 0    | 0       |
| United Kingdom, Scotland             | 92.3                                                                                                 | 65.3               | 0       | 0            |     | 65.3  | 65.3            | 0                   | 0    | 0            | 18.5     | 0                 | 0              | 0            | 8.4      | 0    | 0       |
| United Kingdom, Wales † #            | 104.0                                                                                                | 66.2               |         | 0            | 0   | 7.4   | 74.0            | 9.3                 | 14.7 |              | 24.3     | 3.1               | 2.5            | 0            | 5.6      | 0    | 0       |

Abbreviations used: HD: haemodialysis; Unkn: unknown; HF: haemofiltration; HDF: haemodiafiltration; APD: automated peritoneal dialysis; CAPD: continuous ambulatory peritoneal dialysis; PD: peritoneal dialysis; Tx: transplant  
Categories may not add up because of rounding off; When cells are left empty, (complete) data are unavailable

§ The incidence is underestimated by approximately 1% due to an estimated 1.2% underestimation of the incidence of haemodialysis

\* Patients younger than 20 years of age are not reported

† The incident counts at day 91, on which the data presented in this table are based, are estimated (see methods)

// The incidence of pre-emptive transplantation is underestimated by approximately 30%

# Values based on 1 to 5 patients are suppressed

Table B.3.10  
Treatment modality distribution, unadjusted  
at day 91

|                                      | All | Haemodialysis      |         |              |     |      |                 | Peritoneal dialysis |      |              |          | Kidney transplant |                |              |          | Unkn | Missing |
|--------------------------------------|-----|--------------------|---------|--------------|-----|------|-----------------|---------------------|------|--------------|----------|-------------------|----------------|--------------|----------|------|---------|
|                                      |     | HD hospital/centre | HD home | HD type Unkn | HF  | HDF  | Total HD/HF/HDF | APD                 | CAPD | PD type Unkn | Total PD | Living donor      | Deceased donor | Tx type Unkn | Total Tx |      |         |
|                                      |     | %                  | %       | %            | %   | %    | %               | %                   | %    | %            | %        | %                 | %              | %            | %        |      |         |
| Austria §                            | 100 | 75.1               | 0       | 0            | 0.3 | 11.2 | 86.6            | 4.2                 | 5.7  | 0.1          | 10.0     | 1.6               | 1.8            | 0            | 3.4      | 0    | 0       |
| Belgium, Dutch-speaking *            | 100 | 58.1               | 0.3     | 0            | 0   | 30.7 | 89.0            | 6.0                 | 3.2  | 0            | 9.3      | 0.7               | 1.1            | 0            | 1.7      | 0    | 0       |
| Belgium, French-speaking *           | 100 | 49.4               | 1.2     | 0            | 1.7 | 36.5 | 88.7            | 4.1                 | 5.9  | 0            | 10.1     | 0.4               | 0.9            | 0            | 1.3      | 0    | 0       |
| Bosnia and Herzegovina               | 100 | 81.4               | 0       | 0            | 0   | 16.4 | 97.8            | 0                   | 2.2  | 0            | 2.2      | 0                 | 0              | 0            | 0        | 0    | 0       |
| Denmark                              | 100 | 56.3               | 0.1     | 0            |     |      | 56.5            | 16.2                | 16.2 | 0            | 32.4     | 4.8               | 6.4            | 0            | 11.1     | 0    | 0       |
| Estonia                              | 100 | 74.7               | 0       | 0            | 0   | 0    | 74.7            | 21.3                | 0    | 0            | 21.3     | 0                 | 4.0            | 0            | 4.0      | 0    | 0       |
| Finland                              | 100 | 57.1               | 2.7     | 0            | 0   | 9.5  | 69.2            | 12.0                | 13.3 | 0            | 25.3     | 2.3               | 2.9            | 0.2          | 5.4      | 0    | 0       |
| France †                             | 100 | 63.6               | 0.2     | 0.1          | 0.2 | 20.9 | 85.0            | 2.9                 | 7.8  | 0            | 10.7     | 1.6               | 2.6            | 0            | 4.2      | 0    | 0       |
| Greece                               | 100 | 88.5               | 0       | 0            | 0   | 5.2  | 93.7            | 2.1                 | 3.3  | 0            | 5.4      | 0.9               | 0              | 0            | 0.9      | 0    | 0       |
| Iceland                              | 100 | 62.9               | 0       | 0            |     |      | 62.9            | 2.9                 | 20.0 | 0            | 22.9     | 5.7               | 8.6            | 0            | 14.3     | 0    | 0       |
| Montenegro * †                       | 100 | 100                | 0       | 0            | 0   | 0    | 100             | 0                   | 0    | 0            | 0        | 0                 | 0              | 0            | 0        | 0    | 0       |
| Norway                               | 100 | 59.1               | 0.4     | 0            |     |      | 59.5            |                     |      | 27.5         | 27.5     | 6.1               | 6.9            | 0            | 13.0     | 0    | 0       |
| Romania //                           | 100 | 96.0               | 0       | 0            | 0   | 1.4  | 97.4            | 0.2                 | 2.0  | 0            | 2.2      | 0.2               | 0.2            | 0            | 0.4      | 0    | 0       |
| Serbia                               | 100 | 82.9               | 0       | 0            | 1.4 | 4.2  | 88.4            | 0.8                 | 10.8 | 0            | 11.6     | 0                 | 0              | 0            | 0        | 0    | 0       |
| Spain, Andalusia                     | 100 | 80.9               | 0.2     | 0            |     |      | 81.1            |                     |      | 12.8         | 12.8     | 1.5               | 4.7            | 0            | 6.1      | 0    | 0       |
| Spain, Aragon                        | 100 | 75.1               | 0       | 0            |     | 5.1  | 80.2            | 0.6                 | 14.1 | 0            | 14.7     | 2.3               | 2.3            | 0            | 4.5      | 0.6  | 0       |
| Spain, Asturias                      | 100 | 76.2               | 0       | 0            |     | 0    | 76.2            | 4.9                 | 12.8 | 0            | 17.7     | 0.6               | 5.5            | 0            | 6.1      | 0    | 0       |
| Spain, Basque country                | 100 | 67.4               | 0.7     | 0            |     |      | 68.1            | 2.2                 | 21.7 | 0            | 23.9     | 5.4               | 2.5            | 0            | 8.0      | 0    | 0       |
| Spain, Canary Islands                | 100 | 77.5               | 0       | 0            | 0   | 0    | 77.5            | 0                   | 0    | 19.9         | 19.9     | 0.5               | 2.1            | 0            | 2.6      | 0    | 0       |
| Spain, Cantabria *                   | 100 | 71.4               | 0       | 0            |     |      | 71.4            | 2.9                 | 14.3 | 0            | 17.1     | 0                 | 11.4           | 0            | 11.4     | 0    | 0       |
| Spain, Castile and León * †          | 100 | 82.7               | 0.5     | 0            |     |      | 83.2            | 5.8                 | 7.7  | 0            | 13.6     | 2.5               | 0.7            | 0            | 3.2      | 0    | 0       |
| Spain, Castile-La Mancha *           | 100 | 76.4               | 0       | 0            |     |      | 76.4            | 2.6                 | 18.5 | 0            | 21.0     | 0.5               | 2.1            | 0            | 2.6      | 0    | 0       |
| Spain, Catalonia †                   | 100 | 33.3               | 0.2     | 0            |     | 45.0 | 78.5            | 3.2                 | 9.8  | 0            | 13.0     | 4.4               | 4.0            | 0            | 8.5      | 0    | 0       |
| Spain, Community of Madrid           | 100 | 76.9               | 0.7     | 0            |     |      | 78.2            | 6.2                 | 11.6 | 0            | 17.8     | 1.4               | 2.7            | 0            | 4.1      | 0    | 0       |
| Spain, Extremadura                   | 100 | 87.4               | 0       | 0            |     |      | 87.4            | 7.0                 | 4.9  | 0            | 11.9     | 0                 | 0.7            | 0            | 0.7      | 0    | 0       |
| Spain, Galicia                       | 100 | 75.2               | 1.0     | 0            | 0   | 0    | 76.2            | 2.0                 | 19.2 | 0            | 21.2     | 1.8               | 0.3            | 0.5          | 2.6      | 0    | 0       |
| Spain, La Rioja                      | 100 | 71.9               | 0       | 0            | 0   | 0    | 71.9            | 3.1                 | 25.0 | 0            | 28.1     | 0                 | 0              | 0            | 0        | 0    | 0       |
| Spain, Murcia                        | 100 | 57.2               | 0       | 0            | 0   | 23.9 | 81.1            | 1.0                 | 16.9 | 0            | 17.9     | 0.5               | 0.5            | 0            | 1.0      | 0    | 0       |
| Spain, Navarre *                     | 100 | 65.2               | 7.2     | 0            |     |      | 72.5            | 21.7                | 4.3  | 0            | 26.1     | 0                 | 1.4            | 0            | 1.4      | 0    | 0       |
| Spain, Valencian region †            | 100 | 76.5               | 0.9     | 0            |     |      | 77.4            | 2.0                 | 14.3 | 0            | 16.3     | 1.0               | 5.3            | 0            | 6.2      | 0    | 0       |
| Sweden                               | 100 | 55.1               | 0.2     | 0            |     |      | 55.3            |                     |      | 35.5         | 35.5     | 3.9               | 5.2            | 0            | 9.1      | 0    | 0       |
| Switzerland †                        | 100 | 77.0               | 1.2     | 1.4          | 2.3 | 0    | 81.9            | 4.7                 | 7.7  | 0.2          | 12.7     | 3.6               | 1.8            | 0            | 5.4      | 0    | 0       |
| the Netherlands                      | 100 | 62.7               | 0.2     | 0            |     | 4.0  | 66.9            | 9.3                 | 10.3 | 0            | 19.5     | 11.4              | 2.2            | 0            | 13.6     | 0    | 0       |
| United Kingdom, England † #          | 100 | 55.9               | 0.6     |              |     | 12.8 | 69.4            | 11.7                | 11.9 | 0.3          | 24.0     | 2.6               | 3.8            | 0.2          | 6.6      |      | 0       |
| United Kingdom, Northern Ireland † # | 100 | 69.0               |         | 0            | 0   | 0    | 69.8            | 5.6                 |      | 0            | 8.1      | 5.6               | 16.4           | 0            | 22.0     | 0    | 0       |
| United Kingdom, Scotland             | 100 | 71.2               | 0       | 0            |     |      | 71.2            | 0                   | 0    | 0            | 19.8     | 0                 | 0              | 0            | 9.0      | 0    | 0       |
| United Kingdom, Wales † #            | 100 | 64.3               |         | 0            | 0   | 7.0  | 71.9            | 9.0                 | 13.7 |              | 23.1     | 2.8               | 2.2            | 0            | 5.0      | 0    | 0       |

Abbreviations used: HD: haemodialysis; Unkn: unknown; HF: haemofiltration; HDF: haemodiafiltration; APD: automated peritoneal dialysis; CAPD: continuous ambulatory peritoneal dialysis; PD: peritoneal dialysis; Tx: transplant  
Categories may not add up because of rounding off; When cells are left empty, (complete) data are unavailable

§ The incidence is underestimated by approximately 1% due to an estimated 1.2% underestimation of the incidence of haemodialysis

\* Patients younger than 20 years of age are not reported

† The incident counts at day 91, on which the data presented in this table are based, are estimated (see methods)

// The incidence of pre-emptive transplantation is underestimated by approximately 30%

# Values based on 1 to 5 patients are suppressed

Table B.3.11  
Treatment modality distribution by age, sex, and primary renal disease, unadjusted  
at day 91

|                                      | All |    |    |    | 0-19 |     |     |    | 20-44 |    |    |    | 45-64 |    |    |    | 65-74 |    |    |    | 75+ |    |    |    | Men |    |    |    | Women |    |    |    | DM  |    |    |    | Non-DM |    |    |    |    |   |
|--------------------------------------|-----|----|----|----|------|-----|-----|----|-------|----|----|----|-------|----|----|----|-------|----|----|----|-----|----|----|----|-----|----|----|----|-------|----|----|----|-----|----|----|----|--------|----|----|----|----|---|
|                                      | HD  | PD | Tx | Un | HD   | PD  | Tx  | Un | HD    | PD | Tx | Un | HD    | PD | Tx | Un | HD    | PD | Tx | Un | HD  | PD | Tx | Un | HD  | PD | Tx | Un | HD    | PD | Tx | Un | HD  | PD | Tx | Un | HD     | PD | Tx | Un |    |   |
|                                      | %   | %  | %  | %  | %    | %   | %   | %  | %     | %  | %  | %  | %     | %  | %  | %  | %     | %  | %  | %  | %   | %  | %  | %  | %   | %  | %  | %  | %     | %  | %  | %  | %   | %  | %  | %  | %      | %  | %  | %  |    |   |
| Austria §                            | 87  | 10 | 3  | 0  | 17   | 33  | 50  | 0  | 68    | 21 | 11 | 0  | 84    | 12 | 4  | 0  | 92    | 7  | 2  | 0  | 94  | 6  | 0  | 0  | 86  | 10 | 4  | 0  | 88    | 9  | 3  | 0  | 90  | 9  | 2  | 0  | 86     | 10 | 4  | 0  |    |   |
| Belgium, Dutch-speaking *            | 89  | 9  | 2  | 0  |      |     |     |    | 77    | 20 | 4  | 0  | 77    | 18 | 6  | 0  | 92    | 7  | 1  | 0  | 95  | 5  | 0  | 0  | 88  | 10 | 2  | 0  | 91    | 8  | 2  | 0  | 89  | 11 | 0  | 0  | 89     | 9  | 2  | 0  |    |   |
| Belgium, French-speaking *           | 89  | 10 | 1  | 0  |      |     |     |    | 80    | 13 | 7  | 0  | 84    | 14 | 2  | 0  | 90    | 10 | 0  | 0  | 94  | 6  | 0  | 0  | 90  | 9  | 1  | 0  | 86    | 12 | 2  | 0  | 91  | 8  | 1  | 0  | 88     | 11 | 2  | 0  |    |   |
| Bosnia and Herzegovina               | 98  | 2  | 0  | 0  | 100  | 0   | 0   | 0  | 97    | 3  | 0  | 0  | 97    | 3  | 0  | 0  | 98    | 2  | 0  | 0  | 100 | 0  | 0  | 0  | 98  | 2  | 0  | 0  | 98    | 2  | 0  | 0  | 98  | 2  | 0  | 0  | 98     | 2  | 0  | 0  |    |   |
| Denmark                              | 56  | 32 | 11 | 0  | 44   | 33  | 22  | 0  | 45    | 31 | 24 | 0  | 53    | 33 | 14 | 0  | 58    | 31 | 10 | 0  | 64  | 33 | 3  | 0  | 55  | 34 | 11 | 0  | 58    | 29 | 12 | 0  | 69  | 29 | 2  | 0  | 52     | 34 | 14 | 0  |    |   |
| Estonia                              | 75  | 21 | 4  | 0  | 0    | 50  | 50  | 0  | 80    | 10 | 10 | 0  | 70    | 27 | 3  | 0  | 80    | 20 | 0  | 0  | 85  | 15 | 0  | 0  | 79  | 18 | 3  | 0  | 69    | 25 | 6  | 0  | 67  | 28 | 6  | 0  | 77     | 19 | 4  | 0  |    |   |
| Finland                              | 69  | 25 | 5  | 0  | 36   | 18  | 45  | 0  | 60    | 30 | 10 | 0  | 70    | 24 | 6  | 0  | 73    | 25 | 2  | 0  | 74  | 25 | 1  | 0  | 71  | 25 | 4  | 0  | 66    | 26 | 8  | 0  | 71  | 27 | 2  | 0  | 68     | 25 | 7  | 0  |    |   |
| France †                             | 85  | 11 | 4  | 0  | 58   | 29  | 13  | 0  | 74    | 10 | 15 | 0  | 81    | 11 | 8  | 0  | 89    | 9  | 2  | 0  | 88  | 11 | 0  | 0  | 86  | 10 | 4  | 0  | 84    | 12 | 5  | 0  | 90  | 9  | 1  | 0  | 84     | 11 | 5  | 0  |    |   |
| Greece                               | 94  | 5  | 1  | 0  | 67   | 17  | 17  | 0  | 80    | 8  | 12 | 0  | 92    | 8  | 1  | 0  | 94    | 6  | 0  | 0  | 96  | 4  | 0  | 0  | 94  | 5  | 1  | 0  | 93    | 6  | 1  | 0  | 95  | 5  | 0  | 0  | 93     | 6  | 1  | 0  |    |   |
| Iceland                              | 63  | 23 | 14 | 0  | 0    | 100 | 0   | 0  | 50    | 50 | 0  | 0  | 38    | 25 | 38 | 0  | 75    | 0  | 25 | 0  | 79  | 21 | 0  | 0  | 64  | 27 | 9  | 0  | 62    | 15 | 23 | 0  | 50  | 0  | 50 | 0  | 65     | 26 | 10 | 0  |    |   |
| Montenegro * †                       | 100 | 0  | 0  | 0  |      |     |     |    | 100   | 0  | 0  | 0  | 100   | 0  | 0  | 0  | 100   | 0  | 0  | 0  | 100 | 0  | 0  | 0  | 100 | 0  | 0  | 0  | 100   | 0  | 0  | 0  | 100 | 0  | 0  | 0  | 100    | 0  | 0  | 0  |    |   |
| Norway                               | 59  | 28 | 13 | 0  | 15   | 38  | 46  | 0  | 60    | 19 | 21 | 0  | 58    | 23 | 19 | 0  | 62    | 29 | 9  | 0  | 63  | 36 | 2  | 0  | 58  | 29 | 13 | 0  | 62    | 25 | 13 | 0  | 71  | 22 | 7  | 0  | 57     | 29 | 14 | 0  |    |   |
| Romania //                           | 97  | 2  | 0  | 0  | 78   | 22  | 0   | 0  | 94    | 3  | 2  | 0  | 98    | 2  | 0  | 0  | 99    | 1  | 0  | 0  | 98  | 2  | 0  | 0  | 98  | 2  | 0  | 0  | 97    | 2  | 0  | 0  | 95  | 5  | 0  | 0  | 98     | 2  | 0  | 0  |    |   |
| Serbia                               | 88  | 12 | 0  | 0  | 67   | 33  | 0   | 0  | 72    | 28 | 0  | 0  | 89    | 11 | 0  | 0  | 93    | 7  | 0  | 0  | 94  | 6  | 0  | 0  | 89  | 11 | 0  | 0  | 87    | 13 | 0  | 0  | 85  | 15 | 0  | 0  | 90     | 10 | 0  | 0  |    |   |
| Spain, Andalusia                     | 81  | 13 | 6  | 0  | 12   | 12  | 76  | 0  | 75    | 17 | 8  | 0  | 75    | 16 | 9  | 0  | 84    | 13 | 3  | 0  | 91  | 7  | 2  | 0  | 82  | 12 | 6  | 0  | 79    | 15 | 6  | 0  | 85  | 12 | 4  | 0  | 80     | 13 | 7  | 0  |    |   |
| Spain, Aragon                        | 80  | 15 | 5  | 1  | 33   | 33  | 33  | 0  | 60    | 15 | 20 | 5  | 80    | 17 | 4  | 0  | 89    | 9  | 2  | 0  | 83  | 17 | 0  | 0  | 78  | 16 | 5  | 1  | 87    | 11 | 2  | 0  | 87  | 11 | 2  | 0  | 78     | 16 | 5  | 1  |    |   |
| Spain, Asturias                      | 76  | 18 | 6  | 0  | 50   | 50  | 0   | 0  | 50    | 25 | 25 | 0  | 73    | 23 | 5  | 0  | 71    | 20 | 9  | 0  | 89  | 9  | 2  | 0  | 80  | 15 | 5  | 0  | 69    | 24 | 7  | 0  | 85  | 15 | 0  | 0  | 72     | 19 | 9  | 0  |    |   |
| Spain, Basque country                | 68  | 24 | 8  | 0  | 17   | 0   | 83  | 0  | 61    | 26 | 13 | 0  | 55    | 35 | 10 | 0  | 67    | 25 | 7  | 0  | 86  | 14 | 0  | 0  | 70  | 25 | 6  | 0  | 65    | 22 | 13 | 0  | 84  | 13 | 3  | 0  | 63     | 28 | 10 | 0  |    |   |
| Spain, Canary Islands                | 77  | 20 | 3  | 0  | 75   | 25  | 0   | 0  | 61    | 31 | 8  | 0  | 77    | 20 | 3  | 0  | 75    | 22 | 3  | 0  | 87  | 13 | 0  | 0  | 77  | 21 | 2  | 0  | 79    | 18 | 3  | 0  | 81  | 17 | 2  | 0  | 76     | 21 | 3  | 0  |    |   |
| Spain, Cantabria *                   | 71  | 17 | 11 | 0  |      |     |     |    | 14    | 57 | 29 | 0  | 83    | 6  | 11 | 0  | 73    | 13 | 13 | 0  | 80  | 20 | 0  | 0  | 73  | 16 | 12 | 0  | 68    | 21 | 11 | 0  | 80  | 10 | 10 | 0  | 68     | 20 | 12 | 0  |    |   |
| Spain, Castile and León * †          | 83  | 14 | 3  | 0  |      |     |     |    | 69    | 18 | 13 | 0  | 72    | 21 | 7  | 0  | 89    | 9  | 2  | 0  | 88  | 12 | 0  | 0  | 86  | 11 | 3  | 0  | 77    | 19 | 4  | 0  | 90  | 7  | 3  | 0  | 81     | 16 | 3  | 0  |    |   |
| Spain, Castile-La Mancha *           | 76  | 21 | 3  | 0  |      |     |     |    | 54    | 31 | 15 | 0  | 68    | 31 | 1  | 0  | 85    | 11 | 4  | 0  | 87  | 13 | 0  | 0  | 78  | 19 | 2  | 0  | 72    | 25 | 3  | 0  | 86  | 14 | 0  | 0  | 72     | 24 | 4  | 0  |    |   |
| Spain, Catalonia †                   | 79  | 13 | 8  | 0  | 45   | 0   | 55  | 0  | 66    | 11 | 22 | 0  | 71    | 16 | 13 | 0  | 76    | 16 | 7  | 0  | 90  | 9  | 1  | 0  | 78  | 13 | 8  | 0  | 79    | 13 | 9  | 0  | 86  | 12 | 2  | 0  | 77     | 13 | 10 | 0  |    |   |
| Spain, Community of Madrid           | 78  | 18 | 4  | 0  | 43   | 43  | 14  | 0  | 58    | 31 | 12 | 0  | 72    | 23 | 5  | 0  | 81    | 16 | 3  | 0  | 92  | 8  | 0  | 0  | 79  | 18 | 3  | 0  | 77    | 16 | 7  | 0  | 88  | 11 | 1  | 0  | 75     | 20 | 5  | 0  |    |   |
| Spain, Extremadura                   | 87  | 12 | 1  | 0  | 0    | 0   | 0   | 0  | 71    | 29 | 0  | 0  | 86    | 14 | 0  | 0  | 88    | 10 | 2  | 0  | 92  | 8  | 0  | 0  | 90  | 10 | 0  | 0  | 81    | 16 | 2  | 0  | 91  | 9  | 0  | 0  | 86     | 13 | 1  | 0  |    |   |
| Spain, Galicia                       | 76  | 21 | 3  | 0  | 0    | 0   | 100 | 0  | 75    | 15 | 10 | 0  | 68    | 28 | 4  | 0  | 83    | 16 | 1  | 0  | 80  | 20 | 0  | 0  | 78  | 20 | 2  | 0  | 71    | 25 | 4  | 0  | 85  | 14 | 1  | 0  | 73     | 24 | 3  | 0  |    |   |
| Spain, La Rioja                      | 72  | 28 | 0  | 0  | 0    | 0   | 0   | 0  | 100   | 0  | 0  | 0  | 55    | 45 | 0  | 0  | 75    | 25 | 0  | 0  | 83  | 17 | 0  | 0  | 72  | 28 | 0  | 0  | 71    | 29 | 0  | 0  | 67  | 33 | 0  | 0  | 73     | 27 | 0  | 0  |    |   |
| Spain, Murcia                        | 81  | 18 | 1  | 0  | 50   | 50  | 0   | 0  | 72    | 28 | 0  | 0  | 71    | 26 | 3  | 0  | 84    | 16 | 0  | 0  | 95  | 5  | 0  | 0  | 81  | 19 | 1  | 0  | 82    | 16 | 2  | 0  | 89  | 11 | 0  | 0  | 79     | 20 | 1  | 0  |    |   |
| Spain, Navarre *                     | 72  | 26 | 1  | 0  |      |     |     |    | 60    | 33 | 7  | 0  | 88    | 12 | 0  | 0  | 65    | 35 | 0  | 0  | 75  | 25 | 0  | 0  | 71  | 29 | 0  | 0  | 75    | 21 | 4  | 0  | 77  | 23 | 0  | 0  | 70     | 28 | 2  | 0  |    |   |
| Spain, Valencian region †            | 77  | 16 | 6  | 0  | 0    | 0   | 100 | 0  | 63    | 23 | 13 | 0  | 65    | 24 | 11 | 0  | 80    | 16 | 4  | 0  | 91  | 9  | 1  | 0  | 79  | 16 | 5  | 0  | 74    | 17 | 10 | 0  | 84  | 13 | 3  | 0  | 76     | 17 | 7  | 0  |    |   |
| Sweden                               | 55  | 36 | 9  | 0  | 9    | 48  | 43  | 0  | 39    | 46 | 15 | 0  | 55    | 32 | 14 | 0  | 61    | 31 | 7  | 0  | 61  | 37 | 2  | 0  | 56  | 36 | 8  | 0  | 53    | 34 | 13 | 0  | 61  | 35 | 4  | 0  | 54     | 36 | 11 | 0  |    |   |
| Switzerland †                        | 82  | 13 | 5  | 0  | 31   | 26  | 43  | 0  | 71    | 16 | 14 | 0  | 73    | 17 | 10 | 0  | 85    | 13 | 2  | 0  | 93  | 7  | 0  | 0  | 83  | 12 | 4  | 0  | 79    | 13 | 7  | 0  | 81  | 14 | 4  | 0  | 82     | 12 | 6  | 0  |    |   |
| the Netherlands                      | 67  | 20 | 14 | 0  | 41   | 37  | 22  | 0  | 54    | 17 | 29 | 0  | 59    | 19 | 22 | 0  | 70    | 21 | 9  | 0  | 80  | 18 | 2  | 0  | 67  | 20 | 13 | 0  | 66    | 19 | 15 | 0  | 77  | 20 | 3  | 0  | 64     | 19 | 16 | 0  |    |   |
| United Kingdom, England † #          | 69  | 24 | 7  |    | 38   | 42  | 20  | 0  | 56    | 32 | 12 | 0  | 69    | 23 | 7  | 0  | 73    | 21 | 6  |    | 78  | 22 | 1  | 0  | 70  | 23 | 6  |    | 68    | 25 | 7  | 0  | 74  | 24 | 3  | 0  | 68     | 24 | 8  |    |    |   |
| United Kingdom, Northern Ireland † # | 70  | 8  | 22 | 0  |      |     |     |    | 42    |    | 50 | 0  | 67    |    | 28 | 0  | 83    |    | 12 | 0  | 82  |    | 18 | 0  | 0   | 73 |    | 8  | 19    | 0  | 64 |    | 8   | 28 | 0  | 79 |        | 0  | 67 | 7  | 26 | 0 |
| United Kingdom, Scotland             | 71  | 20 | 9  | 0  | 44   | 44  | 11  | 0  | 57    | 22 | 22 | 0  | 68    | 22 | 11 | 0  | 81    | 15 | 4  | 0  | 80  | 18 | 1  | 0  | 71  | 21 | 8  | 0  | 71    | 18 | 10 | 0  | 77  | 18 | 5  | 0  | 69     | 21 | 10 | 0  |    |   |
| United Kingdom, Wales † #            | 72  | 23 | 5  | 0  | 87   | 0   |     |    | 46    | 38 | 16 | 0  | 69    | 24 | 6  | 0  | 77    | 22 |    |    | 86  | 14 | 0  | 0  | 72  | 23 | 6  | 0  | 73    | 24 |    |    | 72  | 25 |    |    | 72     | 22 | 6  | 0  |    |   |

Abbreviations used: HD: haemodialysis; PD: peritoneal dialysis; Tx: transplant; Un: unknown; DM: diabetes mellitus

Categories may not add up because of missing values or rounding off

§ The incidence is underestimated by approximately 1% due to an estimated 1.2% underestimation of the incidence of haemodialysis

\* Patients younger than 20 years of age are not reported

† The incident counts at day 91, on which the data presented in this table are based, are estimated (see methods)

// The incidence of pre-emptive transplantation is underestimated by approximately 30%

# Values based on 1 to 5 patients are suppressed

Table B.4.1  
**Prevalent counts and percentages by age and sex**  
*prevalent patients on December 31*

|                                  | All      |          |          | 0-19 |     |       |     |     |       | 20-44 |     |       |     |      |       | 45-64 |     |       |     |       |       | 65-74 |     |       |    |      |    | 75+   |    |       |    |      |    |
|----------------------------------|----------|----------|----------|------|-----|-------|-----|-----|-------|-------|-----|-------|-----|------|-------|-------|-----|-------|-----|-------|-------|-------|-----|-------|----|------|----|-------|----|-------|----|------|----|
|                                  | All      | Men      | Women    | All  | Men | Women | All | Men | Women | All   | Men | Women | All | Men  | Women | All   | Men | Women | All | Men   | Women | All   | Men | Women |    |      |    |       |    |       |    |      |    |
|                                  | N (100%) | N (100%) | N (100%) | N    | %   | N     | %   | N   | %     | N     | %   | N     | %   | N    | %     | N     | %   | N     | %   | N     | %     | N     | %   | N     | %  |      |    |       |    |       |    |      |    |
| Austria §                        | 9181     | 5854     | 3327     | 93   | 1   | 55    | 1   | 38  | 1     | 1116  | 12  | 694   | 12  | 422  | 13    | 3678  | 40  | 2378  | 41  | 1300  | 39    | 2310  | 25  | 1511  | 26 | 799  | 24 | 1984  | 22 | 1216  | 21 | 768  | 23 |
| Belgium, Dutch-speaking *        | 8571     | 5236     | 3335     |      |     |       |     |     |       | 885   | 10  | 525   | 10  | 360  | 11    | 2720  | 32  | 1694  | 32  | 1026  | 31    | 2181  | 25  | 1344  | 26 | 837  | 25 | 2785  | 32 | 1673  | 32 | 1112 | 33 |
| Belgium, French-speaking *       | 6663     | 4101     | 2562     |      |     |       |     |     |       | 662   | 10  | 383   | 9   | 279  | 11    | 2298  | 34  | 1470  | 36  | 828   | 32    | 1897  | 28  | 1184  | 29 | 713  | 28 | 1806  | 27 | 1064  | 26 | 742  | 29 |
| Bosnia and Herzegovina           | 2547     | 1536     | 1011     | 15   | 1   | 9     | 1   | 6   | 1     | 407   | 16  | 253   | 16  | 154  | 15    | 1098  | 43  | 700   | 46  | 398   | 39    | 679   | 27  | 396   | 26 | 283  | 28 | 348   | 14 | 178   | 12 | 170  | 17 |
| Denmark                          | 5685     | 3575     | 2110     | 78   | 1   | 49    | 1   | 29  | 1     | 937   | 16  | 598   | 17  | 339  | 16    | 2378  | 42  | 1506  | 42  | 872   | 41    | 1321  | 23  | 814   | 23 | 507  | 24 | 971   | 17 | 608   | 17 | 363  | 17 |
| Estonia                          | 1049     | 625      | 424      | 14   | 1   | 8     | 1   | 6   | 1     | 171   | 16  | 101   | 16  | 70   | 17    | 470   | 45  | 288   | 46  | 182   | 43    | 242   | 23  | 137   | 22 | 105  | 25 | 152   | 14 | 91    | 15 | 61   | 14 |
| Finland                          | 5303     | 3297     | 2006     | 127  | 2   | 73    | 2   | 54  | 3     | 812   | 15  | 501   | 15  | 311  | 16    | 2036  | 38  | 1242  | 38  | 794   | 40    | 1425  | 27  | 919   | 28 | 506  | 25 | 903   | 17 | 562   | 17 | 341  | 17 |
| France                           | 92864    | 57239    | 35625    | 955  | 1   | 569   | 1   | 386 | 1     | 11896 | 13  | 7176  | 13  | 4720 | 13    | 32265 | 35  | 19882 | 35  | 12383 | 35    | 24495 | 26  | 15348 | 27 | 9147 | 26 | 23253 | 25 | 14264 | 25 | 8989 | 25 |
| Greece                           | 15169    | 9953     | 5216     | 88   | 1   | 56    | 1   | 32  | 1     | 1436  | 9   | 949   | 10  | 487  | 9     | 4961  | 33  | 3302  | 33  | 1659  | 32    | 3936  | 26  | 2662  | 27 | 1274 | 24 | 4748  | 31 | 2984  | 30 | 1764 | 34 |
| Iceland                          | 302      | 193      | 109      | 6    | 2   | 4     | 2   | 2   | 2     | 60    | 20  | 30    | 16  | 30   | 28    | 118   | 39  | 75    | 39  | 43    | 39    | 70    | 23  | 51    | 26 | 19   | 17 | 48    | 16 | 33    | 17 | 15   | 14 |
| Montenegro *                     | 241      | 154      | 87       |      |     |       |     |     |       | 44    | 18  | 24    | 16  | 20   | 23    | 109   | 45  | 64    | 42  | 45    | 52    | 67    | 28  | 50    | 32 | 17   | 20 | 21    | 9  | 16    | 10 | 5    | 6  |
| Norway                           | 5464     | 3529     | 1935     | 100  | 2   | 58    | 2   | 42  | 2     | 817   | 15  | 505   | 14  | 312  | 16    | 2168  | 40  | 1373  | 39  | 795   | 41    | 1361  | 25  | 927   | 26 | 434  | 22 | 1018  | 19 | 666   | 19 | 352  | 18 |
| Romania                          | 22074    | 12598    | 9476     | 122  | 1   | 58    | 0   | 64  | 1     | 2704  | 12  | 1601  | 13  | 1103 | 12    | 8018  | 36  | 4848  | 38  | 3170  | 33    | 6161  | 28  | 3422  | 27 | 2739 | 29 | 5069  | 23 | 2669  | 21 | 2400 | 25 |
| Serbia                           | 5516     | 3429     | 2087     | 59   | 1   | 38    | 1   | 21  | 1     | 773   | 14  | 503   | 15  | 270  | 13    | 2261  | 41  | 1363  | 40  | 898   | 43    | 1580  | 29  | 997   | 29 | 583  | 28 | 842   | 15 | 527   | 15 | 315  | 15 |
| Spain, Andalusia                 | 11053    | 6797     | 4256     | 125  | 1   | 74    | 1   | 51  | 1     | 1499  | 14  | 923   | 14  | 576  | 14    | 4501  | 41  | 2870  | 42  | 1631  | 38    | 2667  | 24  | 1666  | 25 | 1001 | 24 | 2261  | 20 | 1264  | 19 | 997  | 23 |
| Spain, Aragon                    | 1872     | 1239     | 633      | 14   | 1   | 4     | 0   | 10  | 2     | 195   | 10  | 124   | 10  | 71   | 11    | 651   | 35  | 418   | 34  | 233   | 37    | 463   | 25  | 325   | 26 | 138  | 22 | 549   | 29 | 368   | 30 | 181  | 29 |
| Spain, Asturias                  | 1477     | 966      | 511      | 13   | 1   | 10    | 1   | 3   | 1     | 119   | 8   | 79    | 8   | 40   | 8     | 551   | 37  | 366   | 38  | 185   | 36    | 426   | 29  | 279   | 29 | 147  | 29 | 368   | 25 | 232   | 24 | 136  | 27 |
| Spain, Basque country            | 2783     | 1782     | 1001     | 31   | 1   | 17    | 1   | 14  | 1     | 351   | 13  | 211   | 12  | 140  | 14    | 1045  | 38  | 670   | 38  | 375   | 37    | 734   | 26  | 476   | 27 | 258  | 26 | 622   | 22 | 408   | 23 | 214  | 21 |
| Spain, Canary Islands            | 3409     | 2235     | 1174     | 17   | 0   | 12    | 1   | 5   | 0     | 392   | 11  | 242   | 11  | 150  | 13    | 1411  | 41  | 928   | 42  | 483   | 41    | 863   | 25  | 581   | 26 | 282  | 24 | 726   | 21 | 472   | 21 | 254  | 22 |
| Spain, Cantabria *               | 680      | 464      | 216      |      |     |       |     |     |       | 75    | 11  | 48    | 10  | 27   | 13    | 258   | 38  | 164   | 35  | 94    | 44    | 189   | 28  | 135   | 29 | 54   | 25 | 158   | 23 | 117   | 25 | 41   | 19 |
| Spain, Castile and León *        | 3187     | 2100     | 1087     |      |     |       |     |     |       | 291   | 9   | 189   | 9   | 102  | 9     | 1142  | 36  | 739   | 35  | 403   | 37    | 807   | 25  | 556   | 26 | 251  | 23 | 947   | 30 | 616   | 29 | 331  | 30 |
| Spain, Castile-La Mancha *       | 2462     | 1547     | 915      |      |     |       |     |     |       | 249   | 10  | 149   | 10  | 100  | 11    | 1022  | 42  | 649   | 42  | 373   | 41    | 601   | 24  | 403   | 26 | 198  | 22 | 590   | 24 | 346   | 22 | 244  | 27 |
| Spain, Catalonia                 | 11593    | 7403     | 4190     | 142  | 1   | 88    | 1   | 54  | 1     | 1277  | 11  | 816   | 11  | 461  | 11    | 4313  | 37  | 2763  | 37  | 1550  | 37    | 2878  | 25  | 1882  | 25 | 996  | 24 | 2983  | 26 | 1854  | 25 | 1129 | 27 |
| Spain, Community of Madrid       | 7753     | 4944     | 2809     | 90   | 1   | 60    | 1   | 30  | 1     | 1006  | 13  | 582   | 12  | 424  | 15    | 3034  | 39  | 1906  | 39  | 1128  | 40    | 1864  | 24  | 1244  | 25 | 620  | 22 | 1759  | 23 | 1152  | 23 | 607  | 22 |
| Spain, Extremadura               | 1384     | 871      | 513      | 8    | 1   | 4     | 0   | 4   | 1     | 131   | 9   | 84    | 10  | 47   | 9     | 601   | 43  | 376   | 43  | 225   | 44    | 344   | 25  | 234   | 27 | 110  | 21 | 300   | 22 | 173   | 20 | 127  | 25 |
| Spain, Galicia                   | 3951     | 2566     | 1385     | 30   | 1   | 20    | 1   | 10  | 1     | 406   | 10  | 250   | 10  | 156  | 11    | 1550  | 39  | 1009  | 39  | 541   | 39    | 1014  | 26  | 672   | 26 | 342  | 25 | 951   | 24 | 615   | 24 | 336  | 24 |
| Spain, La Rioja                  | 383      | 254      | 129      | 1    | 0   | 0     | 0   | 1   | 1     | 54    | 14  | 39    | 15  | 15   | 12    | 144   | 38  | 89    | 35  | 55    | 43    | 87    | 23  | 63    | 25 | 24   | 19 | 97    | 25 | 63    | 25 | 34   | 26 |
| Spain, Murcia                    | 2165     | 1405     | 760      | 21   | 1   | 14    | 1   | 7   | 1     | 240   | 11  | 161   | 11  | 79   | 10    | 877   | 41  | 554   | 39  | 323   | 43    | 517   | 24  | 359   | 26 | 158  | 21 | 510   | 24 | 317   | 23 | 193  | 25 |
| Spain, Navarre *                 | 904      | 596      | 308      |      |     |       |     |     |       | 107   | 12  | 58    | 10  | 49   | 16    | 331   | 37  | 223   | 37  | 108   | 35    | 252   | 28  | 169   | 28 | 83   | 27 | 214   | 24 | 146   | 24 | 68   | 22 |
| Spain, Valencian region          | 7470     | 4777     | 2693     | 50   | 1   | 35    | 1   | 15  | 1     | 807   | 11  | 530   | 11  | 277  | 10    | 2716  | 36  | 1708  | 36  | 1008  | 37    | 1914  | 26  | 1252  | 26 | 662  | 25 | 1983  | 27 | 1252  | 26 | 731  | 27 |
| Sweden                           | 10332    | 6668     | 3664     | 181  | 2   | 111   | 2   | 70  | 2     | 1598  | 15  | 981   | 15  | 617  | 17    | 4043  | 39  | 2616  | 39  | 1427  | 39    | 2501  | 24  | 1609  | 24 | 892  | 24 | 2009  | 19 | 1351  | 20 | 658  | 18 |
| Switzerland                      | 8528     | 5369     | 3159     | 105  | 1   | 63    | 1   | 42  | 1     | 1051  | 12  | 658   | 12  | 393  | 12    | 3181  | 37  | 2011  | 37  | 1170  | 37    | 2187  | 26  | 1364  | 25 | 823  | 26 | 2004  | 23 | 1273  | 24 | 731  | 23 |
| the Netherlands ‡                | 17931    | 10835    | 7096     | 217  | 1   | 130   | 1   | 87  | 1     | 2525  | 14  | 1518  | 14  | 1007 | 14    | 6992  | 39  | 4207  | 39  | 2785  | 39    | 4735  | 26  | 2847  | 26 | 1888 | 27 | 3462  | 19 | 2133  | 20 | 1329 | 19 |
| United Kingdom, England          | 54971    | 33789    | 21182    | 1088 | 2   | 667   | 2   | 421 | 2     | 9948  | 18  | 6002  | 18  | 3946 | 19    | 23781 | 43  | 14572 | 43  | 9209  | 43    | 11642 | 21  | 7145  | 21 | 4497 | 21 | 8512  | 15 | 5403  | 16 | 3109 | 15 |
| United Kingdom, Northern Ireland | 2032     | 1225     | 807      | 37   | 2   | 24    | 2   | 13  | 2     | 392   | 19  | 224   | 18  | 168  | 21    | 872   | 43  | 532   | 43  | 340   | 42    | 384   | 19  | 235   | 19 | 149  | 18 | 347   | 17 | 210   | 17 | 137  | 17 |
| United Kingdom, Scotland         | 5421     | 3272     | 2149     | 78   | 1   | 55    | 2   | 23  | 1     | 970   | 18  | 586   | 18  | 384  | 18    | 2513  | 46  | 1485  | 45  | 1028  | 48    | 1200  | 22  | 757   | 23 | 443  | 21 | 660   | 12 | 389   | 12 | 271  | 13 |
| United Kingdom, Wales            | 3300     | 2078     | 1222     | 54   | 2   | 33    | 2   | 21  | 2     | 612   | 19  | 369   | 18  | 243  | 20    | 1373  | 42  | 867   | 42  | 506   | 41    | 749   | 23  | 468   | 23 | 281  | 23 | 512   | 16 | 341   | 16 | 171  | 14 |

Categories may not add up because of missing values or rounding off  
 § The prevalence is underestimated by approximately 1% due to one hemodialysis centre not submitting data  
 \* Patients younger than 20 years of age are not reported  
 ‡ The prevalence is underestimated by approximately 4%



Table B.4.2  
Prevalence per million (age-related) population by age and sex, unadjusted  
prevalent patients on December 31

|                                  | All    |        |        | 0-19  |       |       | 20-44 |       |       | 45-64  |        |        | 65-74  |        |        | 75+    |        |        |
|----------------------------------|--------|--------|--------|-------|-------|-------|-------|-------|-------|--------|--------|--------|--------|--------|--------|--------|--------|--------|
|                                  | All    | Men    | Women  | All   | Men   | Women | All   | Men   | Women | All    | Men    | Women  | All    | Men    | Women  | All    | Men    | Women  |
|                                  | Pmp    | Pmp    | Pmp    | Pmarp  | Pmarp  | Pmarp  | Pmarp  | Pmarp  | Pmarp  | Pmarp  | Pmarp  | Pmarp  |
| Austria §                        | 1031.4 | 1336.9 | 735.7  | 54.0  | 62.1  | 45.5  | 384.6 | 470.8 | 295.6 | 1422.8 | 1852.7 | 998.9  | 2743.4 | 3843.3 | 1780.0 | 2329.8 | 3547.4 | 1509.4 |
| Belgium, Dutch-speaking *        | 1288.1 | 1588.4 | 993.2  |       |       |       | 433.5 | 510.0 | 355.7 | 1499.2 | 1850.7 | 1141.3 | 3071.7 | 3880.9 | 2301.3 | 4237.9 | 6146.0 | 2888.7 |
| Belgium, French-speaking *       | 1362.6 | 1710.1 | 1028.1 |       |       |       | 407.6 | 469.1 | 345.3 | 1810.9 | 2322.9 | 1301.6 | 4014.4 | 5391.0 | 2819.0 | 4784.6 | 7460.6 | 3159.5 |
| Bosnia and Herzegovina           | 721.3  | 886.7  | 562.0  | 19.1  | 22.3  | 15.7  | 332.7 | 406.4 | 256.3 | 1077.2 | 1409.1 | 761.7  | 2309.3 | 3071.7 | 1714.1 | 1673.3 | 2218.8 | 1330.7 |
| Denmark                          | 965.6  | 1219.9 | 713.5  | 59.6  | 73.0  | 45.5  | 506.0 | 636.0 | 371.9 | 1528.1 | 1932.6 | 1122.3 | 2051.2 | 2605.2 | 1529.1 | 1842.1 | 2672.4 | 1211.6 |
| Estonia                          | 789.0  | 991.9  | 606.2  | 49.6  | 55.2  | 43.7  | 397.5 | 451.0 | 339.4 | 1347.9 | 1715.4 | 1006.6 | 1694.9 | 2399.1 | 1225.5 | 1209.4 | 2505.6 | 682.6  |
| Finland                          | 959.0  | 1207.2 | 716.8  | 109.2 | 122.7 | 95.0  | 469.9 | 562.6 | 371.3 | 1460.2 | 1780.7 | 1139.4 | 2014.4 | 2740.6 | 1360.0 | 1684.0 | 2643.1 | 1053.8 |
| France                           | 1376.0 | 1754.5 | 1021.8 | 59.0  | 68.7  | 48.8  | 594.9 | 727.6 | 465.8 | 1849.9 | 2338.0 | 1385.5 | 3275.4 | 4401.1 | 2291.8 | 3638.1 | 5718.5 | 2306.6 |
| Greece                           | 1417.8 | 1911.9 | 949.6  | 42.6  | 52.5  | 32.0  | 444.5 | 579.6 | 305.7 | 1652.1 | 2298.9 | 1059.1 | 3331.6 | 4858.3 | 2011.1 | 3905.8 | 5773.7 | 2524.4 |
| Iceland                          | 824.1  | 1026.6 | 610.8  | 66.0  | 85.8  | 45.2  | 446.3 | 421.7 | 473.9 | 1345.2 | 1680.5 | 997.9  | 2251.5 | 3271.1 | 1225.9 | 2150.1 | 3289.5 | 1220.2 |
| Montenegro *                     | 387.9  | 501.3  | 277.0  |       |       |       | 208.9 | 223.7 | 193.5 | 672.2  | 808.4  | 542.2  | 1085.9 | 1785.2 | 504.6  | 580.4  | 1113.6 | 229.2  |
| Norway                           | 1015.7 | 1300.8 | 725.7  | 80.4  | 90.9  | 69.4  | 456.2 | 548.9 | 358.2 | 1558.1 | 1933.7 | 1166.8 | 2532.8 | 3486.7 | 1598.6 | 2444.7 | 3727.4 | 1480.6 |
| Romania                          | 1206.1 | 1407.1 | 1013.6 | 31.7  | 29.3  | 34.2  | 457.6 | 525.4 | 385.4 | 1590.6 | 1930.8 | 1253.0 | 3037.3 | 3893.7 | 2382.6 | 3446.5 | 4993.7 | 2563.3 |
| Serbia                           | 888.4  | 1133.8 | 655.3  | 48.9  | 61.1  | 35.9  | 388.1 | 495.2 | 276.7 | 1330.0 | 1651.7 | 1026.5 | 1955.5 | 2747.3 | 1309.9 | 1675.2 | 2650.1 | 1037.0 |
| Spain, Andalusia                 | 1301.9 | 1622.8 | 989.4  | 70.4  | 80.9  | 59.2  | 547.2 | 665.8 | 425.7 | 1810.8 | 2328.3 | 1301.8 | 3407.5 | 4492.5 | 2430.5 | 3197.9 | 4443.3 | 2359.4 |
| Spain, Aragon                    | 1406.7 | 1885.7 | 939.6  | 56.1  | 31.1  | 82.9  | 490.8 | 613.7 | 363.6 | 1650.6 | 2093.5 | 1196.5 | 3363.9 | 4965.0 | 1911.9 | 3611.1 | 6023.7 | 1990.3 |
| Spain, Asturias                  | 1453.9 | 1989.5 | 963.5  | 87.4  | 130.7 | 41.6  | 436.4 | 575.9 | 295.2 | 1682.1 | 2290.9 | 1102.5 | 3188.0 | 4521.4 | 2043.9 | 2760.3 | 4604.5 | 1639.8 |
| Spain, Basque country            | 1272.2 | 1684.0 | 886.4  | 76.5  | 81.4  | 71.2  | 574.0 | 690.6 | 457.5 | 1564.8 | 2035.6 | 1107.2 | 2943.9 | 4083.9 | 1943.2 | 2453.2 | 4155.2 | 1377.5 |
| Spain, Canary Islands            | 1521.4 | 2014.0 | 1038.1 | 42.6  | 58.5  | 25.8  | 513.2 | 635.1 | 391.9 | 2009.3 | 2627.3 | 1383.9 | 4215.0 | 5910.6 | 2649.2 | 4245.6 | 6555.7 | 2565.6 |
| Spain, Cantabria *               | 1166.3 | 1632.8 | 722.8  |       |       |       | 445.5 | 563.4 | 324.7 | 1423.7 | 1826.6 | 1028.0 | 2821.7 | 4275.7 | 1525.1 | 2465.1 | 4745.3 | 1039.6 |
| Spain, Castile and León *        | 1330.7 | 1781.4 | 893.9  |       |       |       | 442.2 | 562.0 | 317.0 | 1545.0 | 1982.9 | 1099.7 | 2909.5 | 4069.1 | 1783.6 | 2815.6 | 4534.7 | 1650.9 |
| Spain, Castile-La Mancha *       | 1202.7 | 1505.3 | 897.6  |       |       |       | 385.2 | 445.8 | 320.3 | 1705.7 | 2120.8 | 1272.4 | 3282.4 | 4511.0 | 2111.8 | 2853.3 | 4048.8 | 2011.2 |
| Spain, Catalonia                 | 1490.0 | 1934.4 | 1059.8 | 90.5  | 108.7 | 71.2  | 499.5 | 628.8 | 366.2 | 1971.9 | 2536.7 | 1411.6 | 3873.4 | 5464.0 | 2498.9 | 4112.5 | 6485.6 | 2568.9 |
| Spain, Community of Madrid       | 1143.5 | 1524.1 | 794.4  | 66.4  | 86.3  | 45.4  | 440.1 | 518.6 | 364.4 | 1572.2 | 2062.4 | 1121.7 | 3040.4 | 4543.2 | 1827.5 | 2953.1 | 5038.6 | 1653.9 |
| Spain, Extremadura               | 1300.8 | 1655.0 | 954.1  | 41.0  | 39.9  | 42.0  | 402.9 | 506.2 | 295.3 | 1876.3 | 2321.9 | 1420.7 | 3274.4 | 4562.6 | 2045.8 | 2538.3 | 3683.6 | 1783.1 |
| Spain, Galicia                   | 1463.5 | 1969.6 | 991.5  | 70.4  | 90.8  | 48.5  | 527.9 | 645.5 | 408.6 | 1904.9 | 2531.5 | 1303.2 | 3138.4 | 4429.9 | 1995.3 | 2587.6 | 4243.1 | 1509.6 |
| Spain, La Rioja                  | 1211.8 | 1631.2 | 804.5  | 16.4  | 0     | 33.9  | 575.5 | 829.2 | 320.5 | 1533.4 | 1883.9 | 1178.5 | 2672.5 | 3958.5 | 1442.4 | 2775.9 | 4445.4 | 1636.9 |
| Spain, Murcia                    | 1432.6 | 1856.7 | 1007.2 | 61.2  | 79.2  | 42.1  | 468.4 | 608.9 | 318.6 | 2098.4 | 2628.3 | 1559.2 | 4180.4 | 6154.1 | 2418.3 | 4462.1 | 6839.1 | 2840.5 |
| Spain, Navarre *                 | 1375.8 | 1835.7 | 926.5  |       |       |       | 537.6 | 578.1 | 496.5 | 1733.2 | 2313.4 | 1141.9 | 3856.1 | 5347.3 | 2459.6 | 3223.7 | 5434.8 | 1720.7 |
| Spain, Valencian region          | 1477.1 | 1916.8 | 1049.8 | 50.3  | 68.4  | 31.2  | 505.0 | 653.0 | 352.2 | 1830.1 | 2312.8 | 1351.9 | 3745.6 | 5230.6 | 2437.0 | 4212.4 | 6567.8 | 2609.5 |
| Sweden                           | 997.9  | 1280.0 | 712.3  | 75.1  | 89.4  | 60.0  | 480.2 | 571.7 | 382.8 | 1591.7 | 2037.2 | 1136.2 | 2286.3 | 2996.4 | 1601.6 | 2044.1 | 3137.3 | 1191.6 |
| Switzerland                      | 987.2  | 1252.8 | 725.8  | 61.0  | 71.2  | 50.2  | 366.0 | 451.7 | 277.7 | 1310.8 | 1648.8 | 969.2  | 2622.6 | 3418.3 | 1892.4 | 2556.7 | 3914.4 | 1593.9 |
| the Netherlands                  | 1070.9 | 1302.2 | 842.4  | 60.1  | 70.3  | 49.4  | 484.5 | 577.0 | 390.2 | 1508.5 | 1816.0 | 1201.3 | 2521.6 | 3084.4 | 1977.5 | 2454.9 | 3543.6 | 1644.2 |
| United Kingdom, England          | 972.1  | 1207.5 | 741.5  | 81.6  | 97.5  | 64.9  | 544.1 | 651.3 | 435.2 | 1643.2 | 2042.2 | 1255.1 | 2079.5 | 2654.5 | 1547.1 | 1749.4 | 2573.1 | 1124.1 |
| United Kingdom, Northern Ireland | 1072.0 | 1311.3 | 839.4  | 76.4  | 96.4  | 55.2  | 652.2 | 747.9 | 557.2 | 1779.4 | 2219.9 | 1357.8 | 2222.8 | 2800.9 | 1676.9 | 2357.4 | 3373.5 | 1612.8 |
| United Kingdom, Scotland         | 991.8  | 1227.7 | 767.3  | 68.3  | 94.0  | 41.3  | 547.1 | 664.6 | 430.8 | 1681.0 | 2054.6 | 1331.3 | 2046.9 | 2699.3 | 1448.5 | 1404.8 | 1991.2 | 987.4  |
| United Kingdom, Wales            | 1041.1 | 1329.0 | 760.9  | 76.9  | 91.6  | 61.5  | 630.8 | 751.6 | 507.1 | 1656.1 | 2149.2 | 1188.7 | 2070.0 | 2669.7 | 1506.4 | 1669.1 | 2554.9 | 986.8  |

§ The prevalence is underestimated by approximately 1% due to one hemodialysis centre not submitting data

\* Patients younger than 20 years of age are not reported

Table B.4.3  
**Sex, mean age, and median age**  
*prevalent patients on December 31*

|                                  | All |              |      |                |      |      | Men  |              |      |                |      |      | Women |              |      |                |      |      |
|----------------------------------|-----|--------------|------|----------------|------|------|------|--------------|------|----------------|------|------|-------|--------------|------|----------------|------|------|
|                                  | %   | Mean (years) | SD   | Median (years) | P25  | P75  | %    | Mean (years) | SD   | Median (years) | P25  | P75  | %     | Mean (years) | SD   | Median (years) | P25  | P75  |
| Austria                          | 100 | 62.4         | 15.5 | 63.8           | 53.4 | 73.5 | 63.8 | 62.4         | 15.2 | 63.8           | 53.7 | 73.4 | 36.2  | 62.5         | 16.0 | 63.9           | 52.9 | 74.1 |
| Belgium, Dutch-speaking *        | 100 | 66.5         | 15.2 | 68.4           | 56.9 | 78.0 | 61.1 | 66.3         | 15.1 | 68.3           | 57.0 | 77.5 | 38.9  | 66.7         | 15.4 | 68.5           | 56.8 | 78.5 |
| Belgium, French-speaking *       | 100 | 65.5         | 14.8 | 67.0           | 56.2 | 75.9 | 61.5 | 65.3         | 14.5 | 66.8           | 56.1 | 75.4 | 38.5  | 65.8         | 15.3 | 67.5           | 56.3 | 76.7 |
| Bosnia and Herzegovina           | 100 | 59.9         | 14.3 | 61.4           | 50.8 | 70.4 | 60.3 | 59.1         | 14.1 | 60.8           | 50.0 | 69.4 | 39.7  | 61.1         | 14.5 | 63.4           | 52.5 | 71.8 |
| Denmark                          | 100 | 59.3         | 15.9 | 60.8           | 49.4 | 71.8 | 62.9 | 59.1         | 15.9 | 60.5           | 49.3 | 71.8 | 37.1  | 59.6         | 15.8 | 61.1           | 49.8 | 71.8 |
| Estonia                          | 100 | 59.0         | 15.6 | 60.0           | 49.4 | 70.8 | 59.6 | 59.0         | 15.7 | 59.6           | 49.5 | 71.0 | 40.4  | 59.1         | 15.5 | 60.7           | 48.8 | 70.6 |
| Finland                          | 100 | 60.1         | 16.4 | 62.5           | 51.1 | 72.4 | 62.2 | 60.3         | 16.3 | 62.8           | 51.1 | 72.5 | 37.8  | 59.7         | 16.6 | 62.3           | 51.1 | 72.1 |
| France                           | 100 | 63.4         | 16.2 | 65.6           | 53.4 | 75.0 | 61.6 | 63.5         | 16.0 | 65.8           | 53.5 | 75.0 | 38.4  | 63.3         | 16.4 | 65.4           | 53.2 | 75.1 |
| Greece                           | 100 | 65.9         | 15.3 | 68.0           | 55.9 | 77.4 | 65.6 | 65.6         | 15.1 | 67.8           | 55.8 | 76.8 | 34.4  | 66.4         | 15.6 | 68.5           | 56.2 | 78.6 |
| Iceland                          | 100 | 58.5         | 16.6 | 59.7           | 46.4 | 72.1 | 63.9 | 59.7         | 17.1 | 61.4           | 48.4 | 72.7 | 36.1  | 56.4         | 15.6 | 56.6           | 43.8 | 69.7 |
| Montenegro *                     | 100 | 58.2         | 13.8 | 61.5           | 48.5 | 67.5 | 63.9 | 59.8         | 14.0 | 62.5           | 51.5 | 68.5 | 36.1  | 55.5         | 13.1 | 57.5           | 45.5 | 65.5 |
| Norway                           | 100 | 60.2         | 16.1 | 62.3           | 50.0 | 72.5 | 64.6 | 60.7         | 16.0 | 63.1           | 50.5 | 72.6 | 35.4  | 59.4         | 16.4 | 60.9           | 48.8 | 72.1 |
| Romania                          | 100 | 63.4         | 15.4 | 65.3           | 53.0 | 74.1 | 57.1 | 62.8         | 15.2 | 64.5           | 52.5 | 73.4 | 42.9  | 64.3         | 15.6 | 66.3           | 53.7 | 75.1 |
| Serbia                           | 100 | 60.7         | 14.7 | 63.0           | 51.4 | 70.9 | 62.2 | 60.6         | 15.0 | 63.0           | 51.0 | 70.9 | 37.8  | 60.9         | 14.3 | 62.7           | 52.0 | 71.0 |
| Spain, Andalusia                 | 100 | 61.4         | 15.3 | 62.7           | 51.8 | 73.0 | 61.5 | 61.0         | 15.0 | 62.2           | 51.9 | 72.2 | 38.5  | 62.0         | 15.8 | 63.7           | 51.8 | 74.4 |
| Spain, Aragon                    | 100 | 65.0         | 15.3 | 66.7           | 55.2 | 77.0 | 66.2 | 65.5         | 14.8 | 67.2           | 56.5 | 77.0 | 33.8  | 64.0         | 16.1 | 65.2           | 52.7 | 77.0 |
| Spain, Asturias                  | 100 | 64.6         | 14.2 | 66.2           | 56.1 | 75.0 | 65.4 | 64.4         | 14.2 | 65.8           | 56.8 | 74.8 | 34.6  | 65.2         | 14.3 | 66.7           | 55.3 | 75.9 |
| Spain, Basque country            | 100 | 62.4         | 15.3 | 64.5           | 52.9 | 73.9 | 64.0 | 62.9         | 15.2 | 64.8           | 53.4 | 74.1 | 36.0  | 61.6         | 15.6 | 63.8           | 51.5 | 73.4 |
| Spain, Canary Islands            | 100 | 62.5         | 14.4 | 63.6           | 52.9 | 73.3 | 65.6 | 62.7         | 14.3 | 64.0           | 53.4 | 73.2 | 34.4  | 62.3         | 14.6 | 63.1           | 52.0 | 73.5 |
| Spain, Cantabria *               | 100 | 63.7         | 13.8 | 65.3           | 54.5 | 74.6 | 68.2 | 64.5         | 13.8 | 66.3           | 55.4 | 75.0 | 31.8  | 61.8         | 13.8 | 62.5           | 52.5 | 72.7 |
| Spain, Castile and León *        | 100 | 66.0         | 14.2 | 67.0           | 56.6 | 77.1 | 65.9 | 66.0         | 14.0 | 67.3           | 56.9 | 76.9 | 34.1  | 65.8         | 14.7 | 66.2           | 56.2 | 77.3 |
| Spain, Castile-La Mancha *       | 100 | 63.7         | 14.0 | 64.3           | 54.4 | 74.6 | 62.8 | 63.6         | 13.6 | 64.3           | 54.7 | 73.8 | 37.2  | 63.8         | 14.8 | 64.0           | 54.1 | 75.5 |
| Spain, Catalonia                 | 100 | 63.5         | 15.6 | 65.3           | 53.5 | 75.3 | 63.9 | 63.5         | 15.5 | 65.3           | 53.7 | 75.0 | 36.1  | 63.6         | 15.9 | 65.4           | 53.3 | 75.7 |
| Spain, Community of Madrid       | 100 | 62.2         | 15.7 | 63.7           | 52.4 | 73.8 | 63.8 | 62.7         | 15.6 | 64.4           | 53.2 | 74.1 | 36.2  | 61.4         | 15.9 | 62.6           | 50.9 | 73.2 |
| Spain, Extremadura               | 100 | 63.1         | 14.1 | 63.7           | 54.2 | 73.3 | 62.9 | 63.0         | 13.6 | 63.7           | 54.5 | 72.8 | 37.1  | 63.3         | 14.9 | 63.7           | 53.9 | 74.9 |
| Spain, Galicia                   | 100 | 63.7         | 14.6 | 64.8           | 54.2 | 74.7 | 64.9 | 63.8         | 14.3 | 65.0           | 54.5 | 74.6 | 35.1  | 63.4         | 15.0 | 64.5           | 53.6 | 74.8 |
| Spain, La Rioja                  | 100 | 62.7         | 15.3 | 63.7           | 51.0 | 75.8 | 66.3 | 62.3         | 15.2 | 64.3           | 50.9 | 74.7 | 33.7  | 63.3         | 15.4 | 62.6           | 52.5 | 76.0 |
| Spain, Murcia                    | 100 | 63.0         | 15.2 | 63.8           | 53.5 | 74.5 | 64.9 | 62.8         | 15.1 | 64.0           | 53.9 | 74.4 | 35.1  | 63.2         | 15.3 | 63.7           | 53.0 | 75.3 |
| Spain, Navarre *                 | 100 | 63.7         | 14.4 | 65.7           | 54.0 | 74.6 | 65.9 | 64.5         | 13.8 | 66.4           | 54.8 | 74.8 | 34.1  | 62.3         | 15.5 | 64.6           | 52.0 | 74.5 |
| Spain, Valencian region          | 100 | 64.1         | 15.1 | 66.0           | 54.4 | 75.5 | 63.9 | 63.9         | 15.1 | 66.0           | 54.5 | 75.4 | 36.1  | 64.4         | 15.1 | 66.0           | 54.3 | 75.8 |
| Sweden                           | 100 | 60.3         | 16.3 | 62.5           | 50.5 | 72.9 | 64.5 | 60.7         | 16.2 | 62.7           | 50.9 | 73.2 | 35.5  | 59.6         | 16.6 | 61.8           | 49.4 | 72.2 |
| Switzerland                      | 100 | 62.8         | 15.8 | 64.7           | 53.6 | 74.5 | 63.0 | 62.9         | 15.7 | 64.7           | 53.6 | 74.5 | 37.0  | 62.7         | 15.8 | 64.6           | 53.6 | 74.5 |
| the Netherlands                  | 100 | 61.2         | 15.6 | 63.2           | 51.6 | 72.9 | 60.4 | 61.3         | 15.6 | 63.3           | 51.5 | 73.1 | 39.6  | 61.1         | 15.7 | 63.1           | 51.7 | 72.7 |
| United Kingdom, England          | 100 | 58.3         | 16.3 | 59.5           | 48.4 | 70.5 | 61.5 | 58.5         | 16.3 | 59.7           | 48.6 | 70.6 | 38.5  | 57.9         | 16.3 | 59.1           | 48.0 | 70.1 |
| United Kingdom, Northern Ireland | 100 | 58.3         | 16.7 | 59.2           | 47.3 | 71.3 | 60.3 | 58.4         | 16.8 | 59.5           | 48.0 | 71.0 | 39.7  | 58.1         | 16.6 | 59.1           | 46.8 | 71.8 |
| United Kingdom, Scotland         | 100 | 57.3         | 15.3 | 59.0           | 48.0 | 68.0 | 60.4 | 57.3         | 15.6 | 59.0           | 48.0 | 69.0 | 39.6  | 57.3         | 15.0 | 59.0           | 48.0 | 68.0 |
| United Kingdom, Wales            | 100 | 58.6         | 16.3 | 59.9           | 48.6 | 71.0 | 63.0 | 59.0         | 16.3 | 60.0           | 49.0 | 71.4 | 37.0  | 58.0         | 16.2 | 59.7           | 47.7 | 70.3 |

Categories may not add up because of missing values or rounding off

\* Patients younger than 20 years of age are not reported

Table B.4.4  
**Prevalence per million population, adjusted**  
*prevalent patients on December 31, adjusted for age and sex*

|                                  | All    | Men    | Women  |
|----------------------------------|--------|--------|--------|
|                                  | Pmp    | Pmp    | Pmp    |
| Austria §                        | 1000.8 | 1294.4 | 720.9  |
| Belgium, Dutch-speaking *        | 1213.6 | 1470.1 | 969.1  |
| Belgium, French-speaking *       | 1458.9 | 1834.7 | 1100.5 |
| Bosnia and Herzegovina           | 787.8  | 980.1  | 604.4  |
| Denmark                          | 956.7  | 1202.5 | 722.3  |
| Estonia                          | 805.9  | 1037.7 | 584.9  |
| Finland                          | 913.7  | 1144.1 | 694.0  |
| France                           | 1366.6 | 1723.5 | 1026.3 |
| Greece                           | 1274.7 | 1703.2 | 866.1  |
| Iceland                          | 937.8  | 1177.3 | 709.4  |
| Montenegro *                     | 404.9  | 535.0  | 280.9  |
| Norway                           | 1048.6 | 1335.1 | 775.3  |
| Romania                          | 1208.8 | 1438.7 | 989.6  |
| Serbia                           | 836.8  | 1073.5 | 611.2  |
| Spain, Andalusia                 | 1306.9 | 1622.4 | 1006.0 |
| Spain, Aragon                    | 1273.0 | 1694.9 | 870.8  |
| Spain, Asturias                  | 1183.7 | 1598.2 | 788.4  |
| Spain, Basque country            | 1139.7 | 1485.2 | 810.3  |
| Spain, Canary Islands            | 1509.3 | 1982.0 | 1058.4 |
| Spain, Cantabria *               | 1040.8 | 1443.5 | 656.8  |
| Spain, Castile and León *        | 1087.8 | 1426.2 | 765.1  |
| Spain, Castile-La Mancha *       | 1174.4 | 1467.3 | 895.1  |
| Spain, Catalonia                 | 1478.5 | 1919.9 | 1057.6 |
| Spain, Community of Madrid       | 1174.8 | 1563.3 | 804.4  |
| Spain, Extremadura               | 1192.9 | 1505.6 | 894.6  |
| Spain, Galicia                   | 1241.3 | 1642.6 | 858.6  |
| Spain, La Rioja                  | 1113.2 | 1494.5 | 749.5  |
| Spain, Murcia                    | 1557.5 | 2035.0 | 1102.2 |
| Spain, Navarre *                 | 1319.5 | 1735.1 | 923.1  |
| Spain, Valencian region          | 1417.0 | 1834.3 | 1019.0 |
| Sweden                           | 1004.3 | 1281.6 | 739.7  |
| Switzerland                      | 969.5  | 1219.0 | 731.6  |
| the Netherlands                  | 1043.2 | 1253.5 | 842.6  |
| United Kingdom, England          | 1005.8 | 1245.0 | 777.7  |
| United Kingdom, Northern Ireland | 1143.5 | 1395.6 | 903.1  |
| United Kingdom, Scotland         | 983.0  | 1211.3 | 765.4  |
| United Kingdom, Wales            | 1031.6 | 1312.5 | 763.7  |

§ The prevalence is underestimated by approximately 1% due to one hemodialysis centre not submitting data

\* Patients younger than 20 years of age are not reported

Table B.4.5  
**Prevalence per million population and percentages by primary renal disease, unadjusted**  
*prevalent patients on December 31*

|                                    | All    |     | GN    |      | PN    |      | PKD   |      | DM     |      |        |      |       |      | HT    |      | RVD  |     | Misc  |      | Unkn  |      | Missing |     |
|------------------------------------|--------|-----|-------|------|-------|------|-------|------|--------|------|--------|------|-------|------|-------|------|------|-----|-------|------|-------|------|---------|-----|
|                                    |        |     |       |      |       |      |       |      | Type 1 |      | Type 2 |      | Both  |      |       |      |      |     |       |      |       |      |         |     |
|                                    | Pmp    | %   | Pmp   | %    | Pmp   | %    | Pmp   | %    | Pmp    | %    | Pmp    | %    | Pmp   | %    | Pmp   | %    | Pmp  | %   | Pmp   | %    | Pmp   | %    | Pmp     | %   |
| Austria §                          | 1031.4 | 100 | 226.9 | 22.0 | 69.5  | 6.7  | 80.3  | 7.8  | 49.5   | 4.8  | 144.6  | 14.0 | 194.1 | 18.8 | 110.2 | 10.7 | 42.5 | 4.1 | 207.7 | 20.1 | 99.2  | 9.6  | 0.9     | 0.1 |
| Belgium, Dutch-speaking *          | 1288.1 | 100 | 222.3 | 17.3 | 84.2  | 6.5  | 134.5 | 10.4 | 48.2   | 3.7  | 160.5  | 12.5 | 208.7 | 16.2 | 110.0 | 8.5  | 39.5 | 3.1 | 356.2 | 27.7 | 132.7 | 10.3 | 0       | 0   |
| Belgium, French-speaking *         | 1362.6 | 100 | 218.6 | 16.0 | 93.9  | 6.9  | 114.3 | 8.4  | 37.6   | 2.8  | 204.9  | 15.0 | 242.5 | 17.8 | 201.0 | 14.8 | 20.0 | 1.5 | 321.3 | 23.6 | 150.9 | 11.1 | 0       | 0   |
| Bosnia and Herzegovina             | 721.3  | 100 | 139.9 | 19.4 | 90.6  | 12.6 | 42.5  | 5.9  | 47.3   | 6.6  | 88.1   | 12.2 | 135.4 | 18.8 | 94.0  | 13.0 | 7.1  | 1.0 | 104.8 | 14.5 | 107.0 | 14.8 | 0       | 0   |
| Denmark                            | 965.6  | 100 | 201.6 | 20.9 | 63.5  | 6.6  | 96.3  | 10.0 | 70.5   | 7.3  | 92.9   | 9.6  | 163.4 | 16.9 | 96.3  | 10.0 | 3.2  | 0.3 | 165.4 | 17.1 | 175.8 | 18.2 | 0       | 0   |
| Estonia                            | 789.0  | 100 | 202.3 | 25.6 | 91.8  | 11.6 | 75.2  | 9.5  |        |      |        |      | 150.4 | 19.1 | 106.1 | 13.4 | 51.1 | 6.5 | 111.3 | 14.1 | 0.8   | 0.1  | 0       | 0   |
| Finland                            | 959.0  | 100 | 204.9 | 21.4 | 82.5  | 8.6  | 131.3 | 13.7 | 149.7  | 15.6 | 89.5   | 9.3  | 239.3 | 24.9 | 47.6  | 5.0  | 3.6  | 0.4 | 166.2 | 17.3 | 83.4  | 8.7  | 0.4     | 0   |
| France                             | 1376.0 | 100 | 275.6 | 20.0 | 101.1 | 7.3  | 138.5 | 10.1 |        |      |        |      | 227.6 | 16.5 | 227.7 | 16.5 | 11.6 | 0.8 | 236.0 | 17.1 | 137.2 | 10.0 | 20.7    | 1.5 |
| Greece                             | 1417.8 | 100 | 228.2 | 16.1 | 84.4  | 6.0  | 111.1 | 7.8  | 26.5   | 1.9  | 236.7  | 16.7 | 263.1 | 18.6 | 135.8 | 9.6  | 16.6 | 1.2 | 151.4 | 10.7 | 427.2 | 30.1 | 0       | 0   |
| Iceland                            | 824.1  | 100 | 196.5 | 23.8 | 54.6  | 6.6  | 92.8  | 11.3 | 51.8   | 6.3  | 38.2   | 4.6  | 90.1  | 10.9 | 147.4 | 17.9 | 21.8 | 2.6 | 182.8 | 22.2 | 38.2  | 4.6  | 0       | 0   |
| Montenegro *                       | 387.9  | 100 | 41.8  | 10.8 | 20.9  | 5.4  | 22.5  | 5.8  | 17.7   | 4.6  | 38.6   | 10.0 | 56.3  | 14.5 | 138.4 | 35.7 | 0    | 0   | 48.3  | 12.4 | 59.6  | 15.4 | 0       | 0   |
| Norway                             | 1015.7 | 100 | 283.9 | 27.9 | 65.6  | 6.5  | 111.7 | 11.0 |        |      |        |      | 140.7 | 13.9 | 180.5 | 17.8 | 6.3  | 0.6 | 199.8 | 19.7 | 25.7  | 2.5  | 1.5     | 0.1 |
| Romania                            | 1206.1 | 100 | 201.0 | 16.7 | 91.0  | 7.5  | 51.4  | 4.3  |        |      |        |      | 115.0 | 9.5  | 69.3  | 5.7  | 6.4  | 0.5 | 182.4 | 15.1 | 489.6 | 40.6 | 0       | 0   |
| Serbia                             | 888.4  | 100 | 163.6 | 18.4 | 86.3  | 9.7  | 58.3  | 6.6  |        |      |        |      | 157.2 | 17.7 | 223.2 | 25.1 | 7.7  | 0.9 | 127.7 | 14.4 | 64.3  | 7.2  | 0       | 0   |
| Spain, Andalusia                   | 1301.9 | 100 | 266.5 | 20.5 | 114.3 | 8.8  | 127.7 | 9.8  |        |      |        |      | 217.7 | 16.7 | 105.4 | 8.1  | 5.3  | 0.4 | 203.2 | 15.6 | 261.8 | 20.1 | 0       | 0   |
| Spain, Aragon                      | 1406.7 | 100 | 292.3 | 20.8 | 73.6  | 5.2  | 119.5 | 8.5  | 65.4   | 4.6  | 181.1  | 12.9 | 246.5 | 17.5 | 141.3 | 10.0 | 2.3  | 0.2 | 170.6 | 12.1 | 360.7 | 25.6 | 0       | 0   |
| Spain, Asturias                    | 1453.9 | 100 | 306.1 | 21.1 | 96.5  | 6.6  | 156.5 | 10.8 | 49.2   | 3.4  | 218.5  | 15.0 | 267.7 | 18.4 | 210.7 | 14.5 | 0    | 0   | 211.6 | 14.6 | 204.7 | 14.1 | 0       | 0   |
| Spain, Basque country              | 1272.2 | 100 | 218.1 | 17.1 | 104.7 | 8.2  | 151.8 | 11.9 | 35.7   | 2.8  | 127.1  | 10.0 | 162.7 | 12.8 | 152.2 | 12.0 | 3.7  | 0.3 | 201.6 | 15.8 | 277.5 | 21.8 | 0       | 0   |
| Spain, Canary Islands              | 1521.4 | 100 | 237.0 | 15.6 | 83.0  | 5.5  | 68.3  | 4.5  | 31.2   | 2.1  | 379.8  | 25.0 | 411.0 | 27.0 | 59.4  | 3.9  | 3.1  | 0.2 | 328.5 | 21.6 | 322.7 | 21.2 | 8.5     | 0.6 |
| Spain, Cantabria *                 | 1166.3 | 100 | 372.2 | 31.9 | 85.8  | 7.4  | 130.4 | 11.2 | 36.0   | 3.1  | 154.4  | 13.2 | 190.4 | 16.3 | 109.8 | 9.4  | 63.5 | 5.4 | 140.6 | 12.1 | 63.5  | 5.4  | 10.3    | 0.9 |
| Spain, Castile and León * ‡        | 1330.7 | 100 | 240.5 | 18.1 | 88.1  | 6.6  | 122.8 | 9.2  | 69.3   | 5.2  | 159.1  | 12.0 | 228.4 | 17.2 | 154.1 | 11.6 | 0.8  | 0.1 | 191.2 | 14.4 | 304.8 | 22.9 | 0       | 0   |
| Spain, Castile-La Mancha *         | 1202.7 | 100 | 241.8 | 20.1 | 127.5 | 10.6 | 140.2 | 11.7 |        |      |        |      | 207.1 | 17.2 | 57.6  | 4.8  | 24.4 | 2.0 | 148.0 | 12.3 | 253.5 | 21.1 | 2.4     | 0.2 |
| Spain, Catalonia                   | 1490.0 | 100 | 286.0 | 19.2 | 127.6 | 8.6  | 149.9 | 10.1 | 35.1   | 2.4  | 171.6  | 11.5 | 209.2 | 14.0 | 111.6 | 7.5  | 33.3 | 2.2 | 154.5 | 10.4 | 306.0 | 20.5 | 111.9   | 7.5 |
| Spain, Community of Madrid         | 1143.5 | 100 | 254.3 | 22.2 | 77.6  | 6.8  | 129.9 | 11.4 | 39.4   | 3.4  | 158.0  | 13.8 | 197.3 | 17.3 | 123.2 | 10.8 | 12.2 | 1.1 | 263.7 | 23.1 | 85.3  | 7.5  | 0       | 0   |
| Spain, Extremadura                 | 1300.8 | 100 | 259.4 | 19.9 | 94.0  | 7.2  | 135.3 | 10.4 |        |      |        |      | 212.4 | 16.3 | 72.4  | 5.6  | 23.5 | 1.8 | 140.0 | 10.8 | 353.4 | 27.2 | 10.3    | 0.8 |
| Spain, Galicia                     | 1463.5 | 100 | 267.1 | 18.2 | 92.6  | 6.3  | 175.6 | 12.0 | 58.5   | 4.0  | 189.3  | 12.9 | 247.8 | 16.9 | 109.3 | 7.5  | 4.1  | 0.3 | 253.4 | 17.3 | 313.7 | 21.4 | 0       | 0   |
| Spain, La Rioja                    | 1211.8 | 100 | 351.2 | 29.0 | 53.8  | 4.4  | 120.2 | 9.9  | 44.3   | 3.7  | 107.6  | 8.9  | 151.9 | 12.5 | 94.9  | 7.8  | 3.2  | 0.3 | 360.7 | 29.8 | 75.9  | 6.3  | 0       | 0   |
| Spain, Murcia                      | 1432.6 | 100 | 371.2 | 25.9 | 112.5 | 7.9  | 119.1 | 8.3  | 38.4   | 2.7  | 182.6  | 12.7 | 221.0 | 15.4 | 88.0  | 6.1  | 1.3  | 0.1 | 238.2 | 16.6 | 281.2 | 19.6 | 0       | 0   |
| Spain, Navarre *                   | 1375.8 | 100 | 252.6 | 18.4 | 50.2  | 3.7  | 179.6 | 13.1 | 71.5   | 5.2  | 155.2  | 11.3 | 226.8 | 16.5 | 159.8 | 11.6 | 1.5  | 0.1 | 277.0 | 20.1 | 228.3 | 16.6 | 0       | 0   |
| Spain, Valencian region            | 1477.1 | 100 | 182.7 | 12.4 | 120.0 | 8.1  | 136.6 | 9.3  |        |      |        |      | 222.8 | 15.1 | 191.0 | 12.9 | 4.7  | 0.3 | 224.8 | 15.2 | 394.3 | 26.7 | 0       | 0   |
| Sweden ‡                           | 997.9  | 100 | 254.0 | 25.5 | 51.4  | 5.1  | 106.5 | 10.7 |        |      |        |      | 172.3 | 17.3 | 111.9 | 11.2 | 3.4  | 0.3 | 200.4 | 20.1 | 97.9  | 9.8  | 0       | 0   |
| Switzerland                        | 987.2  | 100 | 208.4 | 21.1 | 36.6  | 3.7  | 34.5  | 3.5  | 24.4   | 2.5  | 122.5  | 12.4 | 146.9 | 14.9 | 130.2 | 13.2 | 17.6 | 1.8 | 300.8 | 30.5 | 112.3 | 11.4 | 0       | 0   |
| the Netherlands                    | 1070.9 | 100 | 174.0 | 16.3 | 64.7  | 6.0  | 92.2  | 8.6  | 38.9   | 3.6  | 104.0  | 9.7  | 142.9 | 13.3 | 127.0 | 11.9 | 63.0 | 5.9 | 225.8 | 21.1 | 115.7 | 10.8 | 65.6    | 6.1 |
| United Kingdom, England #          | 972.1  | 100 | 179.2 | 18.4 | 93.2  | 9.6  | 91.5  | 9.4  |        |      |        |      | 175.2 | 18.0 | 64.6  | 6.6  | 9.6  | 1.0 | 185.1 | 19.0 | 138.7 | 14.3 | 35.1    | 3.6 |
| United Kingdom, Northern Ireland # | 1072.0 | 100 | 205.2 | 19.1 | 164.1 | 15.3 | 129.3 | 12.1 |        |      |        |      | 157.2 | 14.7 | 32.2  | 3.0  | 7.4  | 0.7 | 222.6 | 20.8 | 134.0 | 12.5 | 20.0    | 1.9 |
| United Kingdom, Scotland           | 991.8  | 100 | 220.3 | 22.2 | 113.8 | 11.5 | 118.7 | 12.0 |        |      |        |      | 172.0 | 17.3 | 31.5  | 3.2  | 5.9  | 0.6 | 222.1 | 22.4 | 107.6 | 10.8 | 0       | 0   |
| United Kingdom, Wales #            | 1041.1 | 100 | 257.8 | 24.8 | 111.7 | 10.7 | 110.1 | 10.6 |        |      |        |      | 189.0 | 18.2 | 44.5  | 4.3  | 8.5  | 0.8 | 201.6 | 19.4 | 116.4 | 11.2 |         |     |

Abbreviations used: GN: glomerulonephritis/sclerosis; PN: pyelonephritis; PKD: polycystic kidneys, adult type; DM: diabetes mellitus; HT: hypertension; RVD: renal vascular disease; Misc: miscellaneous; Unkn: unknown  
 Categories may not add up because of rounding off or a limited number of cases (<10%) with diabetes mellitus type unknown; When cells are left empty, (complete) data are unavailable

§ The prevalence is underestimated by approximately 1% due to one hemodialysis centre not submitting data

\* Patients younger than 20 years of age are not reported

‡ Mapping the 2018 Primary Renal Disease (PRD) codes to the old PRD codes results in a different distribution of PRD groups

# Values based on 1 to 5 patients are suppressed

Table B.4.6  
**Prevalence per million population by primary renal disease, adjusted**  
*prevalent patients on December 31, adjusted for age and sex*

|                                    | All    | GN    | PN    | PKD   | DM     |        |       | HT    | RVD  | Misc  | Unkn  | Missing |
|------------------------------------|--------|-------|-------|-------|--------|--------|-------|-------|------|-------|-------|---------|
|                                    | Pmp    | Pmp   | Pmp   | Pmp   | Type 1 | Type 2 | Both  | Pmp   | Pmp  | Pmp   | Pmp   | Pmp     |
|                                    |        |       |       |       | Pmp    | Pmp    | Pmp   |       |      |       |       |         |
| Austria §                          | 1000.8 | 220.3 | 67.7  | 77.2  | 48.3   | 140.0  | 188.2 | 106.3 | 40.9 | 202.6 | 96.7  | 0.9     |
| Belgium, Dutch-speaking *          | 1213.6 | 213.3 | 80.9  | 128.9 | 46.8   | 147.2  | 194.0 | 101.0 | 35.2 | 333.9 | 126.4 | 0       |
| Belgium, French-speaking *         | 1458.9 | 231.9 | 100.0 | 121.9 | 40.1   | 220.9  | 261.0 | 217.7 | 21.7 | 341.6 | 163.1 | 0       |
| Bosnia and Herzegovina             | 787.8  | 143.5 | 100.6 | 44.3  | 50.5   | 100.9  | 151.3 | 103.1 | 7.7  | 119.2 | 118.0 | 0       |
| Denmark                            | 956.7  | 205.0 | 62.9  | 94.2  | 72.4   | 88.2   | 160.6 | 93.0  | 3.0  | 164.6 | 173.5 | 0       |
| Estonia                            | 805.9  | 208.4 | 92.3  | 72.3  |        |        | 154.7 | 111.8 | 52.7 | 112.9 | 0.8   | 0       |
| Finland                            | 913.7  | 195.8 | 78.2  | 121.0 | 155.6  | 77.8   | 233.3 | 42.7  | 3.1  | 161.5 | 77.8  | 0.3     |
| France                             | 1366.6 | 281.2 | 102.8 | 138.1 |        |        | 221.9 | 216.5 | 11.4 | 239.5 | 134.4 | 20.9    |
| Greece                             | 1274.7 | 216.7 | 79.1  | 103.8 | 26.0   | 204.3  | 230.3 | 117.6 | 14.5 | 140.3 | 372.4 | 0       |
| Iceland                            | 937.8  | 218.3 | 62.4  | 109.4 | 56.0   | 42.7   | 98.7  | 177.6 | 27.8 | 203.2 | 40.3  | 0       |
| Montenegro *                       | 404.9  | 41.1  | 22.2  | 22.8  | 18.2   | 41.3   | 59.4  | 145.8 | 0    | 51.6  | 62.0  | 0       |
| Norway                             | 1048.6 | 291.0 | 67.6  | 117.5 |        |        | 145.5 | 187.1 | 6.7  | 205.4 | 26.3  | 1.5     |
| Romania                            | 1208.8 | 199.7 | 91.8  | 50.6  |        |        | 114.2 | 70.3  | 6.5  | 183.8 | 491.9 | 0       |
| Serbia                             | 836.8  | 157.3 | 82.5  | 53.6  |        |        | 145.1 | 208.1 | 7.3  | 121.2 | 61.8  | 0       |
| Spain, Andalusia                   | 1306.9 | 262.6 | 114.3 | 127.4 |        |        | 220.1 | 108.3 | 5.4  | 204.7 | 264.1 | 0       |
| Spain, Aragon                      | 1273.0 | 270.3 | 69.1  | 109.0 | 60.6   | 159.7  | 220.2 | 120.4 | 1.8  | 156.4 | 325.8 | 0       |
| Spain, Asturias                    | 1183.7 | 253.2 | 83.7  | 124.2 | 42.1   | 168.3  | 210.4 | 158.1 | 0    | 185.2 | 169.0 | 0       |
| Spain, Basque country              | 1139.7 | 200.5 | 96.7  | 133.6 | 32.7   | 108.4  | 141.2 | 128.9 | 3.1  | 188.3 | 247.4 | 0       |
| Spain, Canary Islands              | 1509.3 | 226.9 | 79.4  | 63.7  | 27.9   | 388.5  | 416.4 | 61.8  | 3.1  | 328.9 | 321.0 | 8.0     |
| Spain, Cantabria *                 | 1040.8 | 333.5 | 80.9  | 114.3 | 32.6   | 134.8  | 167.5 | 93.0  | 56.3 | 128.5 | 57.0  | 9.7     |
| Spain, Castile and León * ‡        | 1087.8 | 206.7 | 74.0  | 103.5 | 61.3   | 119.8  | 181.1 | 114.5 | 0.7  | 162.2 | 245.1 | 0       |
| Spain, Castile-La Mancha *         | 1174.4 | 236.5 | 124.1 | 139.3 |        |        | 203.7 | 55.6  | 22.9 | 145.0 | 245.1 | 2.3     |
| Spain, Catalonia                   | 1478.5 | 284.2 | 125.1 | 150.3 | 34.2   | 172.3  | 209.1 | 110.1 | 33.3 | 152.9 | 302.2 | 111.4   |
| Spain, Community of Madrid         | 1174.8 | 259.3 | 77.6  | 134.1 | 38.0   | 168.9  | 206.9 | 127.8 | 12.9 | 269.1 | 87.2  | 0       |
| Spain, Extremadura                 | 1192.9 | 240.6 | 88.0  | 124.8 |        |        | 191.3 | 65.1  | 21.3 | 132.5 | 319.7 | 9.7     |
| Spain, Galicia                     | 1241.3 | 234.8 | 81.6  | 150.7 | 53.6   | 150.4  | 204.0 | 85.7  | 3.1  | 226.4 | 255.0 | 0       |
| Spain, La Rioja                    | 1113.2 | 320.8 | 49.7  | 110.5 | 41.2   | 95.8   | 137.1 | 87.8  | 2.7  | 335.6 | 69.1  | 0       |
| Spain, Murcia                      | 1557.5 | 399.3 | 119.8 | 125.1 | 36.6   | 204.6  | 241.3 | 99.8  | 1.6  | 259.7 | 310.9 | 0       |
| Spain, Navarre *                   | 1319.5 | 245.1 | 49.6  | 172.6 | 68.2   | 147.6  | 215.7 | 146.9 | 1.6  | 271.8 | 216.0 | 0       |
| Spain, Valencian region            | 1417.0 | 176.0 | 115.5 | 129.9 |        |        | 213.5 | 182.5 | 4.5  | 217.0 | 377.9 | 0       |
| Sweden ‡                           | 1004.3 | 258.2 | 51.4  | 109.2 |        |        | 173.6 | 106.9 | 3.4  | 202.6 | 98.9  | 0       |
| Switzerland                        | 969.5  | 203.5 | 36.6  | 34.2  | 23.9   | 120.0  | 143.9 | 126.4 | 17.2 | 297.3 | 110.4 | 0       |
| the Netherlands                    | 1043.2 | 170.4 | 64.2  | 88.0  | 39.1   | 98.4   | 137.4 | 123.4 | 60.0 | 221.6 | 114.4 | 63.9    |
| United Kingdom, England #          | 1005.8 | 186.2 | 96.3  | 95.8  |        |        | 182.0 | 66.8  | 9.6  | 190.0 | 143.4 | 35.7    |
| United Kingdom, Northern Ireland # | 1143.5 | 219.9 | 173.7 | 137.7 |        |        | 167.7 | 35.4  | 8.1  | 236.5 | 143.8 | 20.7    |
| United Kingdom, Scotland           | 983.0  | 219.3 | 113.7 | 115.5 |        |        | 170.4 | 31.1  | 5.6  | 220.0 | 107.4 | 0       |
| United Kingdom, Wales #            | 1031.6 | 258.7 | 114.8 | 107.8 |        |        | 187.8 | 42.3  | 7.9  | 198.1 | 112.7 | 0       |

Abbreviations used: GN: glomerulonephritis/sclerosis; PN: pyelonephritis; PKD: polycystic kidneys, adult type; DM: diabetes mellitus; HT: hypertension; RVD: renal vascular disease; Misc: miscellaneous; Unkn: unknown  
 Categories may not add up because of rounding off or a limited number of cases (<10%) with diabetes mellitus type unknown; When cells are left empty, (complete) data are unavailable

§ The prevalence is underestimated by approximately 1% due to one hemodialysis centre not submitting data

\* Patients younger than 20 years of age are not reported

‡ Mapping the 2018 Primary Renal Disease (PRD) codes to the old PRD codes results in a different distribution of PRD groups

# Values based on 1 to 5 patients are suppressed

Table B.4.7  
**Prevalent counts by treatment modality**  
*prevalent patients on December 31*

|                                    | All   | Haemodialysis      |         |              |    |       |                 | Peritoneal dialysis |      |              |          | Kidney transplant |                |              |          | Unkn | Missing |
|------------------------------------|-------|--------------------|---------|--------------|----|-------|-----------------|---------------------|------|--------------|----------|-------------------|----------------|--------------|----------|------|---------|
|                                    |       | HD hospital/centre | HD home | HD type Unkn | HF | HDF   | Total HD/HF/HDF | APD                 | CAPD | PD type Unkn | Total PD | Living donor      | Deceased donor | Tx type Unkn | Total Tx |      |         |
|                                    |       | N                  | N       | N            | N  | N     | N               | N                   | N    | N            | N        | N                 | N              | N            | N        |      |         |
| Austria §                          | 9181  | 3289               | 0       | 11           | 9  | 1059  | 4368            | 195                 | 143  | 8            | 346      | 812               | 3634           | 10           | 4456     | 11   | 0       |
| Belgium, Dutch-speaking *          | 8571  | 2559               | 61      | 0            | 0  | 1814  | 4434            | 239                 | 121  | 0            | 360      | 307               | 3470           | 0            | 3777     | 0    | 0       |
| Belgium, French-speaking *         | 6663  | 2064               | 111     | 0            | 48 | 1365  | 3588            | 132                 | 153  | 0            | 285      | 268               | 2339           | 174          | 2781     | 9    | 0       |
| Bosnia and Herzegovina             | 2547  | 1188               | 0       | 0            | 0  | 881   | 2069            | 1                   | 88   | 3            | 92       | 248               | 132            | 6            | 386      | 0    | 0       |
| Denmark                            | 5685  | 1861               | 165     | 0            |    |       | 2026            | 271                 | 232  | 8            | 511      | 1209              | 1934           | 2            | 3145     | 3    | 0       |
| Estonia                            | 1049  | 332                | 0       | 0            | 0  | 0     | 332             | 32                  | 24   | 1            | 57       | 26                | 634            | 0            | 660      | 0    | 0       |
| Finland                            | 5303  | 880                | 126     | 0            | 0  | 663   | 1669            | 182                 | 128  | 0            | 310      | 297               | 2973           | 54           | 3324     | 0    | 0       |
| France                             | 92864 | 30358              | 646     | 67           | 54 | 16487 | 47612           | 1093                | 1935 | 2            | 3030     | 5503              | 34714          | 1512         | 41729    | 493  | 0       |
| Greece                             | 15169 | 7927               | 0       | 0            | 0  | 3836  | 11763           | 416                 | 257  | 0            | 673      | 1153              | 1580           | 0            | 2733     | 0    | 0       |
| Iceland                            | 302   | 71                 | 0       | 0            |    |       | 71              | 3                   | 15   | 0            | 18       | 126               | 87             | 0            | 213      | 0    | 0       |
| Montenegro *                       | 241   | 237                | 0       | 0            | 0  | 0     | 237             | 0                   | 0    | 0            | 0        | 3                 | 0              | 1            | 4        | 0    | 0       |
| Norway                             | 5464  | 1311               | 46      | 0            |    |       | 1357            |                     |      | 416          | 416      | 1396              | 2283           | 9            | 3688     | 3    | 0       |
| Romania //                         | 22074 | 17931              | 0       | 1            | 34 | 1075  | 19041           | 69                  | 1030 | 0            | 1099     | 483               | 799            | 623          | 1905     | 15   | 14      |
| Serbia                             | 5516  | 3393               | 34      | 10           | 21 | 763   | 4221            | 40                  | 413  | 4            | 457      | 432               | 396            | 4            | 832      | 6    | 0       |
| Spain, Andalusia                   | 11053 | 4443               | 25      | 0            |    |       | 4468            |                     |      | 361          | 361      | 570               | 5654           | 0            | 6224     | 0    | 0       |
| Spain, Aragon                      | 1872  | 441                | 1       | 0            |    | 131   | 573             | 12                  | 77   | 0            | 89       | 109               | 1098           | 0            | 1207     | 3    | 0       |
| Spain, Asturias                    | 1477  | 542                | 5       | 0            | 0  | 13    | 560             | 25                  | 57   | 0            | 82       | 43                | 789            | 3            | 835      | 0    | 0       |
| Spain, Basque country              | 2783  | 740                | 4       | 0            |    |       | 744             | 24                  | 126  | 0            | 150      | 189               | 1700           | 0            | 1889     | 0    | 0       |
| Spain, Canary Islands              | 3409  | 1581               | 1       | 0            | 0  | 0     | 1582            | 0                   | 0    | 220          | 220      | 58                | 1540           | 0            | 1598     | 9    | 0       |
| Spain, Cantabria *                 | 680   | 220                | 2       | 0            |    |       | 222             | 8                   | 32   | 0            | 40       | 22                | 396            | 0            | 418      | 0    | 0       |
| Spain, Castile and León *          | 3187  | 1138               | 12      | 0            |    |       | 1150            | 77                  | 72   | 0            | 149      | 91                | 1733           | 0            | 1824     | 64   | 0       |
| Spain, Castile-La Mancha *         | 2462  | 913                | 0       | 0            |    |       | 913             | 24                  | 124  | 0            | 148      | 47                | 1303           | 51           | 1401     | 0    | 0       |
| Spain, Catalonia                   | 11593 | 1006               | 19      | 0            |    | 3188  | 4213            | 207                 | 253  | 0            | 460      | 1437              | 5483           | 0            | 6920     | 0    | 0       |
| Spain, Community of Madrid         | 7753  | 2943               | 55      | 0            |    |       | 3004            | 140                 | 284  | 0            | 424      | 348               | 3976           | 0            | 4324     | 1    | 0       |
| Spain, Extremadura                 | 1384  | 679                | 5       | 0            |    |       | 684             | 32                  | 16   | 0            | 48       | 29                | 382            | 239          | 650      | 2    | 0       |
| Spain, Galicia                     | 3951  | 1661               | 17      | 0            | 0  | 0     | 1678            | 100                 | 176  | 0            | 276      | 286               | 1634           | 77           | 1997     | 0    | 0       |
| Spain, La Rioja                    | 383   | 129                | 0       | 0            | 0  | 0     | 129             | 6                   | 11   | 0            | 17       | 13                | 224            | 0            | 237      | 0    | 0       |
| Spain, Murcia                      | 2165  | 385                | 0       | 0            | 0  | 695   | 1080            | 21                  | 84   | 0            | 105      | 74                | 906            | 0            | 980      | 0    | 0       |
| Spain, Navarre *                   | 904   | 289                | 18      | 0            |    |       | 307             | 33                  | 5    | 0            | 38       | 38                | 521            | 0            | 559      | 0    | 0       |
| Spain, Valencian region            | 7470  | 3542               | 87      | 0            |    |       | 3629            | 82                  | 382  | 0            | 464      | 150               | 2678           | 523          | 3351     | 26   | 0       |
| Sweden                             | 10332 | 3063               | 121     | 0            |    |       | 3184            |                     |      | 916          | 916      | 2559              | 3670           | 0            | 6229     | 3    | 0       |
| Switzerland                        | 8528  | 3344               | 67      | 1            | 96 | 0     | 3508            | 146                 | 178  | 0            | 324      | 1798              | 2871           | 23           | 4692     | 4    | 0       |
| the Netherlands ‡                  | 17931 | 4269               | 272     | 0            |    | 730   | 5271            | 617                 | 386  | 0            | 1003     | 6166              | 5482           | 9            | 11657    | 0    | 0       |
| United Kingdom, England #          | 54971 | 15324              | 1154    |              | 19 | 4314  | 20816           | 1923                | 1353 | 37           | 3313     | 9840              | 20248          | 745          | 30833    | 9    | 0       |
| United Kingdom, Northern Ireland # | 2032  | 537                | 21      |              | 0  | 11    | 572             | 35                  | 10   |              | 46       | 615               | 738            | 61           | 1414     | 0    | 0       |
| United Kingdom, Scotland           | 5421  | 1841               | 42      | 0            |    |       | 1883            | 125                 | 71   | 0            | 196      | 0                 | 0              | 0            | 3342     | 0    | 0       |
| United Kingdom, Wales #            | 3300  | 1089               | 103     | 0            | 0  | 91    | 1283            | 99                  | 87   | 0            | 186      | 570               | 1251           | 10           | 1831     | 0    | 0       |

Abbreviations used: HD: haemodialysis; Unkn: unknown; HF: haemofiltration; HDF: haemodiafiltration; APD: automated peritoneal dialysis; CAPD: continuous ambulatory peritoneal dialysis; PD: peritoneal dialysis; Tx: transplant

When cells are left empty, (complete) data are unavailable

§ The prevalence is underestimated by approximately 1% due to an estimated 1.2% underestimation of the prevalence of haemodialysis

\* Patients younger than 20 years of age are not reported

// The prevalence of patients living on a functioning graft is underestimated by approximately 30%

‡ The prevalence is underestimated by approximately 4%

# Values based on 1 to 5 patients are suppressed

Table B.4.8  
Prevalence per million population by treatment modality, unadjusted  
prevalent patients on December 31

|                                    | Prevalence per million population by treatment modality, unadjusted |                    |         |              |      |       |                     |      |      |              |                   |              |                |              |          |         |     |
|------------------------------------|---------------------------------------------------------------------|--------------------|---------|--------------|------|-------|---------------------|------|------|--------------|-------------------|--------------|----------------|--------------|----------|---------|-----|
|                                    | All                                                                 | Haemodialysis      |         |              |      |       | Peritoneal dialysis |      |      |              | Kidney transplant |              |                |              | Unkn     | Missing |     |
|                                    | Pmp                                                                 | HD hospital/centre | HD home | HD type Unkn | HF   | HDF   | Total HD/HF/HDF     | APD  | CAPD | PD type Unkn | Total PD          | Living donor | Deceased donor | Tx type Unkn | Total Tx | Pmp     | Pmp |
| Austria §                          | 1031.4                                                              | 369.5              | 0       | 1.2          | 1.0  | 119.0 | 490.7               | 21.9 | 16.1 | 0.9          | 38.9              | 91.2         | 408.3          | 1.1          | 500.6    | 1.2     | 0   |
| Belgium, Dutch-speaking *          | 1288.1                                                              | 384.6              | 9.2     | 0            | 0    | 272.6 | 666.3               | 35.9 | 18.2 | 0            | 54.1              | 46.1         | 521.5          | 0            | 567.6    | 0       | 0   |
| Belgium, French-speaking *         | 1362.6                                                              | 422.1              | 22.7    | 0            | 9.8  | 279.1 | 733.7               | 27.0 | 31.3 | 0            | 58.3              | 54.8         | 478.3          | 35.6         | 568.7    | 1.8     | 0   |
| Bosnia and Herzegovina             | 721.3                                                               | 336.4              | 0       | 0            | 0    | 249.5 | 585.9               | 0.3  | 24.9 | 0.8          | 26.1              | 70.2         | 37.4           | 1.7          | 109.3    | 0       | 0   |
| Denmark                            | 965.6                                                               | 316.1              | 28.0    | 0            |      |       | 344.1               | 46.0 | 39.4 | 1.4          | 86.8              | 205.3        | 328.5          | 0.3          | 534.2    | 0.5     | 0   |
| Estonia                            | 789.0                                                               | 249.7              | 0       | 0            | 0    | 0     | 249.7               | 24.1 | 18.1 | 0.8          | 42.9              | 19.6         | 476.9          | 0            | 496.4    | 0       | 0   |
| Finland                            | 959.0                                                               | 159.1              | 22.8    | 0            | 0    | 119.9 | 301.8               | 32.9 | 23.1 | 0            | 56.1              | 53.7         | 537.7          | 9.8          | 601.1    | 0       | 0   |
| France                             | 1376.0                                                              | 449.8              | 9.6     | 1.0          | 0.8  | 244.3 | 705.5               | 16.2 | 28.7 | 0            | 44.9              | 81.5         | 514.4          | 22.4         | 618.3    | 7.3     | 0   |
| Greece                             | 1417.8                                                              | 740.9              | 0       | 0            | 0    | 358.6 | 1099.5              | 38.9 | 24.0 | 0            | 62.9              | 107.8        | 147.7          | 0            | 255.5    | 0       | 0   |
| Iceland                            | 824.1                                                               | 193.7              | 0       | 0            |      |       | 193.7               | 8.2  | 40.9 | 0            | 49.1              | 343.8        | 237.4          | 0            | 581.2    | 0       | 0   |
| Montenegro *                       | 387.9                                                               | 381.5              | 0       | 0            | 0    | 0     | 381.5               | 0    | 0    | 0            | 0                 | 4.8          | 0              | 1.6          | 6.4      | 0       | 0   |
| Norway                             | 1015.7                                                              | 243.7              | 8.6     | 0            |      |       | 252.3               |      |      | 77.3         | 77.3              | 259.5        | 424.4          | 1.7          | 685.6    | 0.6     | 0   |
| Romania //                         | 1206.1                                                              | 979.7              | 0       | 0.1          | 1.9  | 58.7  | 1040.4              | 3.8  | 56.3 | 0            | 60.0              | 26.4         | 43.7           | 34.0         | 104.1    | 0.8     | 0.8 |
| Serbia                             | 888.4                                                               | 546.4              | 5.5     | 1.6          | 3.4  | 122.9 | 679.8               | 6.4  | 66.5 | 0.6          | 73.6              | 69.6         | 63.8           | 0.6          | 134.0    | 1.0     | 0   |
| Spain, Andalusia                   | 1301.9                                                              | 523.3              | 2.9     | 0            |      |       | 526.3               |      |      | 42.5         | 42.5              | 67.1         | 665.9          | 0            | 733.1    | 0       | 0   |
| Spain, Aragon                      | 1406.7                                                              | 331.4              | 0.8     | 0            |      | 98.4  | 430.6               | 9.0  | 57.9 | 0            | 66.9              | 81.9         | 825.1          | 0            | 907.0    | 2.3     | 0   |
| Spain, Asturias                    | 1453.9                                                              | 533.5              | 4.9     | 0            | 0    | 12.8  | 551.2               | 24.6 | 56.1 | 0            | 80.7              | 42.3         | 776.7          | 3.0          | 821.9    | 0       | 0   |
| Spain, Basque country              | 1272.2                                                              | 338.3              | 1.8     | 0            |      |       | 340.1               | 11.0 | 57.6 | 0            | 68.6              | 86.4         | 777.1          | 0            | 863.5    | 0       | 0   |
| Spain, Canary Islands              | 1521.4                                                              | 705.6              | 0.4     | 0            | 0    | 0     | 706.0               | 0    | 0    | 98.2         | 98.2              | 25.9         | 687.3          | 0            | 713.2    | 4.0     | 0   |
| Spain, Cantabria *                 | 1166.3                                                              | 377.3              | 3.4     | 0            |      |       | 380.8               | 13.7 | 54.9 | 0            | 68.6              | 37.7         | 679.2          | 0            | 717.0    | 0       | 0   |
| Spain, Castile and León *          | 1330.7                                                              | 475.2              | 5.0     | 0            |      |       | 480.2               | 32.2 | 30.1 | 0            | 62.2              | 38.0         | 723.6          | 0            | 761.6    | 26.7    | 0   |
| Spain, Castile-La Mancha *         | 1202.7                                                              | 446.0              | 0       | 0            |      |       | 446.0               | 11.7 | 60.6 | 0            | 72.3              | 23.0         | 636.5          | 24.9         | 684.4    | 0       | 0   |
| Spain, Catalonia                   | 1490.0                                                              | 129.3              | 2.4     | 0            |      | 409.7 | 541.5               | 26.6 | 32.5 | 0            | 59.1              | 184.7        | 704.7          | 0            | 889.4    | 0       | 0   |
| Spain, Community of Madrid         | 1143.5                                                              | 434.1              | 8.1     | 0            |      |       | 443.1               | 20.6 | 41.9 | 0            | 62.5              | 51.3         | 586.4          | 0            | 637.8    | 0.1     | 0   |
| Spain, Extremadura                 | 1300.8                                                              | 638.2              | 4.7     | 0            |      |       | 642.9               | 30.1 | 15.0 | 0            | 45.1              | 27.3         | 359.0          | 224.6        | 610.9    | 1.9     | 0   |
| Spain, Galicia                     | 1463.5                                                              | 615.2              | 6.3     | 0            | 0    | 0     | 621.5               | 37.0 | 65.2 | 0            | 102.2             | 105.9        | 605.2          | 28.5         | 739.7    | 0       | 0   |
| Spain, La Rioja                    | 1211.8                                                              | 408.2              | 0       | 0            | 0    | 0     | 408.2               | 19.0 | 34.8 | 0            | 53.8              | 41.1         | 708.7          | 0            | 749.9    | 0       | 0   |
| Spain, Murcia                      | 1432.6                                                              | 254.8              | 0       | 0            | 0    | 459.9 | 714.6               | 13.9 | 55.6 | 0            | 69.5              | 49.0         | 599.5          | 0            | 648.5    | 0       | 0   |
| Spain, Navarre *                   | 1375.8                                                              | 439.8              | 27.4    | 0            |      |       | 467.2               | 50.2 | 7.6  | 0            | 57.8              | 57.8         | 792.9          | 0            | 850.7    | 0       | 0   |
| Spain, Valencian region            | 1477.1                                                              | 700.4              | 17.2    | 0            |      |       | 717.6               | 16.2 | 75.5 | 0            | 91.7              | 29.7         | 529.5          | 103.4        | 662.6    | 5.1     | 0   |
| Sweden                             | 997.9                                                               | 295.8              | 11.7    | 0            |      |       | 307.5               |      |      | 88.5         | 88.5              | 247.2        | 354.5          | 0            | 601.6    | 0.3     | 0   |
| Switzerland                        | 987.2                                                               | 387.1              | 7.8     | 0.1          | 11.1 | 0     | 406.1               | 16.9 | 20.6 | 0            | 37.5              | 208.1        | 332.4          | 2.7          | 543.2    | 0.5     | 0   |
| the Netherlands                    | 1070.9                                                              | 255.0              | 16.2    | 0            |      | 43.6  | 314.8               | 36.8 | 23.1 | 0            | 59.9              | 368.3        | 327.4          | 0.5          | 696.2    | 0       | 0   |
| United Kingdom, England #          | 972.1                                                               | 271.0              | 20.4    |              | 0.3  | 76.3  | 368.1               | 34.0 | 23.9 | 0.7          | 58.6              | 174.0        | 358.1          | 13.2         | 545.2    | 0.2     | 0   |
| United Kingdom, Northern Ireland # | 1072.0                                                              | 283.3              | 11.1    |              | 0    | 5.8   | 301.8               | 18.5 | 5.3  |              | 24.3              | 324.5        | 389.3          | 32.2         | 746.0    | 0       | 0   |
| United Kingdom, Scotland           | 991.8                                                               | 336.8              | 7.7     | 0            |      |       | 344.5               | 22.9 | 13.0 | 0            | 35.9              | 0            | 0              | 0            | 611.4    | 0       | 0   |
| United Kingdom, Wales #            | 1041.1                                                              | 343.6              | 32.5    | 0            | 0    | 28.7  | 404.8               | 31.2 | 27.4 | 0            | 58.7              | 179.8        | 394.7          | 3.2          | 577.7    | 0       | 0   |

Abbreviations used: HD: haemodialysis; Unkn: unknown; HF: haemofiltration; HDF: haemodiafiltration; APD: automated peritoneal dialysis; CAPD: continuous ambulatory peritoneal dialysis; PD: peritoneal dialysis; Tx: transplant  
Categories may not add up because of rounding off; When cells are left empty, (complete) data are unavailable

§ The prevalence is underestimated by approximately 1% due to an estimated 1.2% underestimation of the prevalence of haemodialysis

\* Patients younger than 20 years of age are not reported

// The prevalence of patients living on a functioning graft is underestimated by approximately 30%

# Values based on 1 to 5 patients are suppressed

Table B.4.9  
**Prevalence per million population by treatment modality, adjusted**  
*prevalent patients on December 31, adjusted for age and sex*

|                                    | All                |         |              |     |      |                 |                     |      |              |          |                   |                |              |          |       |      | Unkn | Missing |
|------------------------------------|--------------------|---------|--------------|-----|------|-----------------|---------------------|------|--------------|----------|-------------------|----------------|--------------|----------|-------|------|------|---------|
|                                    | Haemodialysis      |         |              |     |      |                 | Peritoneal dialysis |      |              |          | Kidney transplant |                |              |          |       |      |      |         |
|                                    | HD hospital/centre | HD home | HD type Unkn | HF  | HDF  | Total HD/HF/HDF | APD                 | CAPD | PD type Unkn | Total PD | Living donor      | Deceased donor | Tx type Unkn | Total Tx |       |      |      |         |
| Pmp                                | Pmp                | Pmp     | Pmp          | Pmp | Pmp  | Pmp             | Pmp                 | Pmp  | Pmp          | Pmp      | Pmp               | Pmp            | Pmp          | Pmp      | Pmp   | Pmp  |      |         |
| Austria §                          | 1000.8             | 357.2   | 0            | 1.2 | 1.0  | 115.0           | 474.3               | 21.1 | 15.5         | 0.8      | 37.4              | 89.4           | 397.4        | 1.1      | 487.9 | 1.2  | 0    |         |
| Belgium, Dutch-speaking *          | 1213.6             | 352.1   | 9.1          | 0   | 0    | 248.7           | 610.0               | 34.1 | 17.2         | 0        | 51.3              | 47.1           | 505.3        | 0        | 552.4 | 0    | 0    |         |
| Belgium, French-speaking *         | 1458.9             | 456.2   | 23.6         | 0   | 10.5 | 303.2           | 793.5               | 28.8 | 33.3         | 0        | 62.1              | 56.9           | 506.6        | 37.9     | 601.4 | 1.9  | 0    |         |
| Bosnia and Herzegovina             | 787.8              | 369.5   | 0            | 0   | 0    | 281.5           | 651.0               | 0.4  | 27.7         | 0.9      | 29.0              | 69.1           | 37.0         | 1.7      | 107.8 | 0    | 0    |         |
| Denmark                            | 956.7              | 305.5   | 28.1         | 0   |      |                 | 333.5               | 44.7 | 38.1         | 1.3      | 84.1              | 210.5          | 327.7        | 0.3      | 538.5 | 0.5  | 0    |         |
| Estonia                            | 805.9              | 257.5   | 0            | 0   | 0    | 0               | 257.5               | 24.7 | 18.1         | 0.8      | 43.6              | 20.0           | 484.8        | 0        | 504.8 | 0    | 0    |         |
| Finland                            | 913.7              | 146.3   | 22.7         | 0   | 0    | 110.5           | 279.5               | 31.8 | 20.8         | 0        | 52.6              | 53.1           | 518.7        | 9.8      | 581.6 | 0    | 0    |         |
| France                             | 1366.6             | 435.4   | 10.1         | 1.0 | 0.8  | 234.7           | 682.0               | 16.0 | 27.1         | 0        | 43.2              | 85.7           | 526.2        | 22.3     | 634.2 | 7.3  | 0    |         |
| Greece                             | 1274.7             | 632.4   | 0            | 0   | 0    | 334.8           | 967.2               | 35.7 | 21.9         | 0        | 57.6              | 108.0          | 141.8        | 0        | 249.8 | 0    | 0    |         |
| Iceland                            | 937.8              | 238.5   | 0            | 0   |      |                 | 238.5               | 12.7 | 47.8         | 0        | 60.6              | 377.4          | 261.4        | 0        | 638.8 | 0    | 0    |         |
| Montenegro *                       | 404.9              | 398.5   | 0            | 0   | 0    | 0               | 398.5               | 0    | 0            | 0        | 0                 | 4.9            | 0            | 1.5      | 6.4   | 0    | 0    |         |
| Norway                             | 1048.6             | 253.3   | 8.8          | 0   |      |                 | 262.1               |      |              | 80.6     | 80.6              | 264.5          | 439.1        | 1.7      | 705.3 | 0.6  | 0    |         |
| Romania //                         | 1208.8             | 984.2   | 0            | 0.1 | 1.9  | 57.6            | 1043.7              | 3.8  | 57.1         | 0        | 61.0              | 25.9           | 43.0         | 33.7     | 102.6 | 0.8  | 0.7  |         |
| Serbia                             | 836.8              | 507.7   | 5.4          | 1.5 | 3.2  | 116.7           | 634.5               | 6.3  | 63.0         | 0.6      | 69.9              | 69.2           | 61.6         | 0.6      | 131.5 | 0.9  | 0    |         |
| Spain, Andalusia                   | 1306.9             | 538.2   | 2.8          | 0   |      |                 | 541.0               |      |              | 43.5     | 43.5              | 65.7           | 656.6        | 0        | 722.3 | 0    | 0    |         |
| Spain, Aragon                      | 1273.0             | 287.7   | 0.7          | 0   |      | 87.3            | 375.7               | 8.6  | 50.4         | 0        | 59.0              | 80.6           | 755.9        | 0        | 836.5 | 1.8  | 0    |         |
| Spain, Asturias                    | 1183.7             | 414.8   | 4.1          | 0   | 0    | 9.9             | 428.8               | 20.9 | 43.0         | 0        | 63.9              | 40.3           | 648.4        | 2.4      | 691.1 | 0    | 0    |         |
| Spain, Basque country              | 1139.7             | 290.0   | 1.6          | 0   |      |                 | 291.5               | 9.9  | 50.1         | 0        | 60.0              | 84.2           | 703.9        | 0        | 788.2 | 0    | 0    |         |
| Spain, Canary Islands              | 1509.3             | 726.4   | 0.4          | 0   | 0    | 0               | 726.7               | 0    | 0            | 99.1     | 99.1              | 23.9           | 655.7        | 0        | 679.6 | 3.8  | 0    |         |
| Spain, Cantabria *                 | 1040.8             | 331.3   | 4.2          | 0   |      |                 | 335.5               | 13.3 | 48.8         | 0        | 62.1              | 37.2           | 606.0        | 0        | 643.2 | 0    | 0    |         |
| Spain, Castile and León *          | 1087.8             | 364.4   | 4.6          | 0   |      |                 | 368.9               | 26.4 | 23.8         | 0        | 50.2              | 36.0           | 616.4        | 0        | 652.5 | 16.3 | 0    |         |
| Spain, Castile-La Mancha *         | 1174.4             | 430.6   | 0            | 0   |      |                 | 430.6               | 10.8 | 59.5         | 0        | 70.3              | 23.1           | 625.6        | 24.7     | 673.5 | 0    | 0    |         |
| Spain, Catalonia                   | 1478.5             | 128.0   | 2.3          | 0   |      | 401.9           | 532.2               | 26.5 | 32.6         | 0        | 59.1              | 182.0          | 705.2        | 0        | 887.2 | 0    | 0    |         |
| Spain, Community of Madrid         | 1174.8             | 450.8   | 8.3          | 0   |      |                 | 460.0               | 20.7 | 43.2         | 0        | 63.9              | 51.3           | 599.4        | 0        | 650.7 | 0.2  | 0    |         |
| Spain, Extremadura                 | 1192.9             | 570.5   | 4.5          | 0   |      |                 | 574.9               | 28.4 | 14.8         | 0        | 43.2              | 27.1           | 336.8        | 209.3    | 573.1 | 1.6  | 0    |         |
| Spain, Galicia                     | 1241.3             | 488.9   | 5.5          | 0   | 0    | 0               | 494.4               | 33.2 | 52.8         | 0        | 86.0              | 98.4           | 531.4        | 31.0     | 660.8 | 0    | 0    |         |
| Spain, La Rioja                    | 1113.2             | 360.2   | 0            | 0   | 0    | 0               | 360.2               | 17.9 | 31.9         | 0        | 49.8              | 41.9           | 661.3        | 0        | 703.3 | 0    | 0    |         |
| Spain, Murcia                      | 1557.5             | 283.9   | 0            | 0   | 0    | 512.5           | 796.4               | 13.8 | 60.5         | 0        | 74.3              | 50.0           | 636.9        | 0        | 686.8 | 0    | 0    |         |
| Spain, Navarre *                   | 1319.5             | 412.6   | 27.0         | 0   |      |                 | 439.6               | 46.5 | 8.0          | 0        | 54.5              | 55.7           | 769.7        | 0        | 825.4 | 0    | 0    |         |
| Spain, Valencian region            | 1417.0             | 672.3   | 16.3         | 0   |      |                 | 688.6               | 15.8 | 72.7         | 0        | 88.4              | 29.2           | 506.4        | 99.3     | 634.9 | 5.0  | 0    |         |
| Sweden                             | 1004.3             | 288.3   | 12.3         | 0   |      |                 | 300.6               |      |              | 85.2     | 85.2              | 255.7          | 362.4        | 0        | 618.1 | 0.3  | 0    |         |
| Switzerland                        | 969.5              | 378.8   | 7.5          | 0.1 | 10.9 | 0               | 397.3               | 16.7 | 20.2         | 0        | 36.8              | 204.1          | 328.1        | 2.6      | 534.9 | 0.5  | 0    |         |
| the Netherlands                    | 1043.2             | 248.8   | 15.9         | 0   |      | 42.7            | 307.4               | 35.6 | 22.3         | 0        | 57.9              | 361.0          | 316.4        | 0.5      | 677.9 | 0    | 0    |         |
| United Kingdom, England #          | 1005.8             | 278.0   | 21.3         |     | 0.3  | 78.1            | 377.8               | 34.7 | 24.5         | 0.6      | 59.8              | 180.8          | 373.3        | 13.8     | 568.0 | 0.2  | 0    |         |
| United Kingdom, Northern Ireland # | 1143.5             | 306.9   | 11.9         |     | 0    | 6.5             | 327.1               | 19.8 | 5.8          |          | 26.2              | 341.6          | 414.3        | 34.3     | 790.2 | 0    | 0    |         |
| United Kingdom, Scotland           | 983.0              | 330.2   | 7.4          | 0   |      |                 | 337.7               | 22.7 | 12.8         | 0        | 35.5              | 0              | 0            | 0        | 609.9 | 0    | 0    |         |
| United Kingdom, Wales #            | 1031.6             | 328.1   | 33.2         | 0   | 0    | 27.6            | 388.9               | 29.7 | 26.3         | 0        | 56.0              | 184.7          | 398.5        | 3.5      | 586.7 | 0    | 0    |         |

Abbreviations used: HD: haemodialysis; Unkn: unknown; HF: haemofiltration; HDF: haemodiafiltration; APD: automated peritoneal dialysis; CAPD: continuous ambulatory peritoneal dialysis; PD: peritoneal dialysis; Tx: transplant  
 Categories may not add up because of rounding off; When cells are left empty, (complete) data are unavailable

§ The prevalence is underestimated by approximately 1% due to an estimated 1.2% underestimation of the prevalence of haemodialysis

\* Patients younger than 20 years of age are not reported

// The prevalence of patients living on a functioning graft is underestimated by approximately 30%

# Values based on 1 to 5 patients are suppressed



Table B.4.10  
**Treatment modality distribution, unadjusted**  
*prevalent patients on December 31*

|                                    | All | Haemodialysis      |         |              |     |      |                 | Peritoneal dialysis |      |              |          | Kidney transplant |                |              |          | Unkn | Missing |
|------------------------------------|-----|--------------------|---------|--------------|-----|------|-----------------|---------------------|------|--------------|----------|-------------------|----------------|--------------|----------|------|---------|
|                                    |     | HD hospital/centre | HD home | HD type Unkn | HF  | HDF  | Total HD/HF/HDF | APD                 | CAPD | PD type Unkn | Total PD | Living donor      | Deceased donor | Tx type Unkn | Total Tx |      |         |
|                                    |     | %                  | %       | %            | %   | %    | %               | %                   | %    | %            | %        | %                 | %              | %            | %        |      |         |
| Austria §                          | 100 | 35.8               | 0       | 0.1          | 0.1 | 11.5 | 47.6            | 2.1                 | 1.6  | 0.1          | 3.8      | 8.8               | 39.6           | 0.1          | 48.5     | 0.1  | 0       |
| Belgium, Dutch-speaking *          | 100 | 29.9               | 0.7     | 0            | 0   | 21.2 | 51.7            | 2.8                 | 1.4  | 0            | 4.2      | 3.6               | 40.5           | 0            | 44.1     | 0    | 0       |
| Belgium, French-speaking *         | 100 | 31.0               | 1.7     | 0            | 0.7 | 20.5 | 53.8            | 2.0                 | 2.3  | 0            | 4.3      | 4.0               | 35.1           | 2.6          | 41.7     | 0.1  | 0       |
| Bosnia and Herzegovina             | 100 | 46.6               | 0       | 0            | 0   | 34.6 | 81.2            | 0                   | 3.5  | 0.1          | 3.6      | 9.7               | 5.2            | 0.2          | 15.2     | 0    | 0       |
| Denmark                            | 100 | 32.7               | 2.9     | 0            |     |      | 35.6            | 4.8                 | 4.1  | 0.1          | 9.0      | 21.3              | 34.0           | 0            | 55.3     | 0.1  | 0       |
| Estonia                            | 100 | 31.6               | 0       | 0            | 0   | 0    | 31.6            | 3.1                 | 2.3  | 0.1          | 5.4      | 2.5               | 60.4           | 0            | 62.9     | 0    | 0       |
| Finland                            | 100 | 16.6               | 2.4     | 0            | 0   | 12.5 | 31.5            | 3.4                 | 2.4  | 0            | 5.8      | 5.6               | 56.1           | 1.0          | 62.7     | 0    | 0       |
| France                             | 100 | 32.7               | 0.7     | 0.1          | 0.1 | 17.8 | 51.3            | 1.2                 | 2.1  | 0            | 3.3      | 5.9               | 37.4           | 1.6          | 44.9     | 0.5  | 0       |
| Greece                             | 100 | 52.3               | 0       | 0            | 0   | 25.3 | 77.5            | 2.7                 | 1.7  | 0            | 4.4      | 7.6               | 10.4           | 0            | 18.0     | 0    | 0       |
| Iceland                            | 100 | 23.5               | 0       | 0            |     |      | 23.5            | 1.0                 | 5.0  | 0            | 6.0      | 41.7              | 28.8           | 0            | 70.5     | 0    | 0       |
| Montenegro *                       | 100 | 98.3               | 0       | 0            | 0   | 0    | 98.3            | 0                   | 0    | 0            | 0        | 1.2               | 0              | 0.4          | 1.7      | 0    | 0       |
| Norway                             | 100 | 24.0               | 0.8     | 0            |     |      | 24.8            |                     |      | 7.6          | 7.6      | 25.5              | 41.8           | 0.2          | 67.5     | 0.1  | 0       |
| Romania //                         | 100 | 81.2               | 0       | 0            | 0.2 | 4.9  | 86.3            | 0.3                 | 4.7  | 0            | 5.0      | 2.2               | 3.6            | 2.8          | 8.6      | 0.1  | 0.1     |
| Serbia                             | 100 | 61.5               | 0.6     | 0.2          | 0.4 | 13.8 | 76.5            | 0.7                 | 7.5  | 0.1          | 8.3      | 7.8               | 7.2            | 0.1          | 15.1     | 0.1  | 0       |
| Spain, Andalusia                   | 100 | 40.2               | 0.2     | 0            |     |      | 40.4            |                     |      | 3.3          | 3.3      | 5.2               | 51.2           | 0            | 56.3     | 0    | 0       |
| Spain, Aragon                      | 100 | 23.6               | 0.1     | 0            |     | 7.0  | 30.6            | 0.6                 | 4.1  | 0            | 4.8      | 5.8               | 58.7           | 0            | 64.5     | 0.2  | 0       |
| Spain, Asturias                    | 100 | 36.7               | 0.3     | 0            | 0   | 0.9  | 37.9            | 1.7                 | 3.9  | 0            | 5.6      | 2.9               | 53.4           | 0.2          | 56.5     | 0    | 0       |
| Spain, Basque country              | 100 | 26.6               | 0.1     | 0            |     |      | 26.7            | 0.9                 | 4.5  | 0            | 5.4      | 6.8               | 61.1           | 0            | 67.9     | 0    | 0       |
| Spain, Canary Islands              | 100 | 46.4               | 0       | 0            | 0   | 0    | 46.4            | 0                   | 0    | 6.5          | 6.5      | 1.7               | 45.2           | 0            | 46.9     | 0.3  | 0       |
| Spain, Cantabria *                 | 100 | 32.4               | 0.3     | 0            |     |      | 32.6            | 1.2                 | 4.7  | 0            | 5.9      | 3.2               | 58.2           | 0            | 61.5     | 0    | 0       |
| Spain, Castile and León *          | 100 | 35.7               | 0.4     | 0            |     |      | 36.1            | 2.4                 | 2.3  | 0            | 4.7      | 2.9               | 54.4           | 0            | 57.2     | 2.0  | 0       |
| Spain, Castile-La Mancha *         | 100 | 37.1               | 0       | 0            |     |      | 37.1            | 1.0                 | 5.0  | 0            | 6.0      | 1.9               | 52.9           | 2.1          | 56.9     | 0    | 0       |
| Spain, Catalonia                   | 100 | 8.7                | 0.2     | 0            |     | 27.5 | 36.3            | 1.8                 | 2.2  | 0            | 4.0      | 12.4              | 47.3           | 0            | 59.7     | 0    | 0       |
| Spain, Community of Madrid         | 100 | 38.0               | 0.7     | 0            |     |      | 38.7            | 1.8                 | 3.7  | 0            | 5.5      | 4.5               | 51.3           | 0            | 55.8     | 0    | 0       |
| Spain, Extremadura                 | 100 | 49.1               | 0.4     | 0            |     |      | 49.4            | 2.3                 | 1.2  | 0            | 3.5      | 2.1               | 27.6           | 17.3         | 47.0     | 0.1  | 0       |
| Spain, Galicia                     | 100 | 42.0               | 0.4     | 0            | 0   | 0    | 42.5            | 2.5                 | 4.5  | 0            | 7.0      | 7.2               | 41.4           | 1.9          | 50.5     | 0    | 0       |
| Spain, La Rioja                    | 100 | 33.7               | 0       | 0            | 0   | 0    | 33.7            | 1.6                 | 2.9  | 0            | 4.4      | 3.4               | 58.5           | 0            | 61.9     | 0    | 0       |
| Spain, Murcia                      | 100 | 17.8               | 0       | 0            | 0   | 32.1 | 49.9            | 1.0                 | 3.9  | 0            | 4.8      | 3.4               | 41.8           | 0            | 45.3     | 0    | 0       |
| Spain, Navarre *                   | 100 | 32.0               | 2.0     | 0            |     |      | 34.0            | 3.7                 | 0.6  | 0            | 4.2      | 4.2               | 57.6           | 0            | 61.8     | 0    | 0       |
| Spain, Valencian region            | 100 | 47.4               | 1.2     | 0            |     |      | 48.6            | 1.1                 | 5.1  | 0            | 6.2      | 2.0               | 35.9           | 7.0          | 44.9     | 0.3  | 0       |
| Sweden                             | 100 | 29.6               | 1.2     | 0            |     |      | 30.8            |                     |      | 8.9          | 8.9      | 24.8              | 35.5           | 0            | 60.3     | 0    | 0       |
| Switzerland                        | 100 | 39.2               | 0.8     | 0            | 1.1 | 0    | 41.1            | 1.7                 | 2.1  | 0            | 3.8      | 21.1              | 33.7           | 0.3          | 55.0     | 0    | 0       |
| the Netherlands                    | 100 | 23.8               | 1.5     | 0            |     | 4.1  | 29.4            | 3.4                 | 2.2  | 0            | 5.6      | 34.4              | 30.6           | 0.1          | 65.0     | 0    | 0       |
| United Kingdom, England #          | 100 | 27.9               | 2.1     |              | 0   | 7.8  | 37.9            | 3.5                 | 2.5  | 0.1          | 6.0      | 17.9              | 36.8           | 1.4          | 56.1     | 0    | 0       |
| United Kingdom, Northern Ireland # | 100 | 26.4               | 1.0     |              | 0   | 0.5  | 28.1            | 1.7                 | 0.5  |              | 2.3      | 30.3              | 36.3           | 3.0          | 69.6     | 0    | 0       |
| United Kingdom, Scotland           | 100 | 34.0               | 0.8     | 0            |     |      | 34.7            | 2.3                 | 1.3  | 0            | 3.6      | 0                 | 0              | 0            | 61.6     | 0    | 0       |
| United Kingdom, Wales #            | 100 | 33.0               | 3.1     | 0            | 0   | 2.8  | 38.9            | 3.0                 | 2.6  | 0            | 5.6      | 17.3              | 37.9           | 0.3          | 55.5     | 0    | 0       |

Abbreviations used: HD: haemodialysis; Unkn: unknown; HF: haemofiltration; HDF: haemodiafiltration; APD: automated peritoneal dialysis; CAPD: continuous ambulatory peritoneal dialysis; PD: peritoneal dialysis; Tx: transplant  
 Categories may not add up because of rounding off; When cells are left empty, (complete) data are unavailable

§ The prevalence is underestimated by approximately 1% due to an estimated 1.2% underestimation of the prevalence of haemodialysis

\* Patients younger than 20 years of age are not reported

// The prevalence of patients living on a functioning graft is underestimated by approximately 30%

# Values based on 1 to 5 patients are suppressed

Table B.4.11  
**Treatment modality distribution by age, sex, and primary renal disease, unadjusted**  
*prevalent patients on December 31*

|                                  | All |    |    |    | 0-19 |    |     |    | 20-44 |    |    |    | 45-64 |    |    |    | 65-74 |    |    |    | 75+ |    |    |    | Men |    |    |    | Women |    |    |    | DM  |    |    |    | Non-DM |    |    |    |    |    |    |    |
|----------------------------------|-----|----|----|----|------|----|-----|----|-------|----|----|----|-------|----|----|----|-------|----|----|----|-----|----|----|----|-----|----|----|----|-------|----|----|----|-----|----|----|----|--------|----|----|----|----|----|----|----|
|                                  | HD  | PD | Tx | Un | HD   | PD | Tx  | Un | HD    | PD | Tx | Un | HD    | PD | Tx | Un | HD    | PD | Tx | Un | HD  | PD | Tx | Un | HD  | PD | Tx | Un | HD    | PD | Tx | Un | HD  | PD | Tx | Un | HD     | PD | Tx | Un | HD | PD | Tx | Un |
|                                  | %   | %  | %  | %  | %    | %  | %   | %  | %     | %  | %  | %  | %     | %  | %  | %  | %     | %  | %  | %  | %   | %  | %  | %  | %   | %  | %  | %  | %     | %  | %  | %  | %   | %  | %  | %  | %      | %  | %  | %  | %  | %  | %  | %  |
| Austria §                        | 48  | 4  | 49 | 0  | 8    | 4  | 88  | 0  | 29    | 5  | 66 | 0  | 36    | 4  | 60 | 0  | 52    | 3  | 45 | 0  | 76  | 3  | 21 | 0  | 48  | 4  | 48 | 0  | 47    | 4  | 49 | 0  | 64  | 3  | 33 | 0  | 44     | 4  | 52 | 0  |    |    |    |    |
| Belgium, Dutch-speaking *        | 52  | 4  | 44 | 0  |      |    |     |    | 27    | 5  | 68 | 0  | 31    | 4  | 65 | 0  | 48    | 3  | 49 | 0  | 83  | 4  | 13 | 0  | 52  | 4  | 44 | 0  | 52    | 4  | 44 | 0  | 68  | 5  | 27 | 0  | 48     | 4  | 47 | 0  |    |    |    |    |
| Belgium, French-speaking *       | 54  | 4  | 42 | 0  |      |    |     |    | 35    | 4  | 61 | 0  | 41    | 4  | 55 | 0  | 55    | 5  | 40 | 0  | 76  | 4  | 20 | 0  | 53  | 4  | 42 | 0  | 55    | 5  | 41 | 0  | 71  | 5  | 24 | 0  | 50     | 4  | 46 | 0  |    |    |    |    |
| Bosnia and Herzegovina           | 81  | 4  | 15 | 0  | 60   | 0  | 40  | 0  | 58    | 4  | 38 | 0  | 80    | 3  | 17 | 0  | 91    | 4  | 5  | 0  | 96  | 3  | 1  | 0  | 80  | 3  | 17 | 0  | 83    | 5  | 12 | 0  | 88  | 5  | 6  | 0  | 80     | 3  | 17 | 0  |    |    |    |    |
| Denmark                          | 36  | 9  | 55 | 0  | 8    | 5  | 87  | 0  | 21    | 4  | 74 | 0  | 27    | 7  | 66 | 0  | 43    | 10 | 47 | 0  | 63  | 17 | 20 | 0  | 36  | 9  | 57 | 0  | 34    | 9  | 57 | 0  | 52  | 12 | 37 | 0  | 32     | 8  | 59 | 0  |    |    |    |    |
| Estonia                          | 32  | 5  | 63 | 0  | 0    | 14 | 86  | 0  | 25    | 5  | 71 | 0  | 22    | 5  | 73 | 0  | 36    | 6  | 58 | 0  | 66  | 6  | 28 | 0  | 31  | 6  | 63 | 0  | 33    | 5  | 62 | 0  | 31  | 11 | 59 | 0  | 32     | 4  | 64 | 0  |    |    |    |    |
| Finland                          | 31  | 6  | 63 | 0  | 3    | 1  | 96  | 0  | 20    | 5  | 75 | 0  | 26    | 5  | 70 | 0  | 34    | 7  | 59 | 0  | 54  | 9  | 36 | 0  | 33  | 6  | 62 | 0  | 30    | 6  | 64 | 0  | 42  | 7  | 51 | 0  | 28     | 6  | 67 | 0  |    |    |    |    |
| France                           | 51  | 3  | 45 | 1  | 19   | 6  | 75  | 0  | 30    | 2  | 67 | 0  | 38    | 2  | 59 | 1  | 56    | 3  | 41 | 1  | 77  | 5  | 17 | 0  | 51  | 3  | 45 | 1  | 51    | 4  | 45 | 1  | 73  | 4  | 23 | 0  | 47     | 3  | 49 | 1  |    |    |    |    |
| Greece                           | 78  | 4  | 18 | 0  | 26   | 20 | 53  | 0  | 49    | 5  | 46 | 0  | 68    | 4  | 27 | 0  | 82    | 5  | 14 | 0  | 94  | 4  | 3  | 0  | 78  | 4  | 18 | 0  | 76    | 6  | 19 | 0  | 92  | 4  | 4  | 0  | 74     | 5  | 21 | 0  |    |    |    |    |
| Iceland                          | 24  | 6  | 71 | 0  | 0    | 0  | 100 | 0  | 13    | 7  | 80 | 0  | 14    | 3  | 84 | 0  | 27    | 6  | 67 | 0  | 58  | 15 | 27 | 0  | 24  | 6  | 70 | 0  | 22    | 6  | 72 | 0  | 27  | 6  | 67 | 0  | 23     | 6  | 71 | 0  |    |    |    |    |
| Montenegro *                     | 98  | 0  | 2  | 0  |      |    |     |    | 95    | 0  | 5  | 0  | 99    | 0  | 1  | 0  | 99    | 0  | 1  | 0  | 100 | 0  | 0  | 0  | 98  | 0  | 2  | 0  | 99    | 0  | 1  | 0  | 100 | 0  | 0  | 0  | 98     | 0  | 2  | 0  |    |    |    |    |
| Norway                           | 25  | 8  | 67 | 0  | 6    | 6  | 88  | 0  | 15    | 5  | 80 | 0  | 20    | 5  | 75 | 0  | 27    | 9  | 65 | 0  | 42  | 14 | 44 | 0  | 26  | 8  | 67 | 0  | 23    | 8  | 69 | 0  | 36  | 8  | 56 | 0  | 23     | 7  | 69 | 0  |    |    |    |    |
| Romania //                       | 86  | 5  | 9  | 0  | 61   | 14 | 25  | 0  | 70    | 4  | 26 | 0  | 83    | 4  | 12 | 0  | 92    | 5  | 3  | 0  | 93  | 7  | 0  | 0  | 86  | 4  | 10 | 0  | 87    | 6  | 7  | 0  | 90  | 7  | 3  | 0  | 86     | 5  | 9  | 0  |    |    |    |    |
| Serbia                           | 77  | 8  | 15 | 0  | 39   | 17 | 44  | 0  | 55    | 8  | 36 | 0  | 73    | 8  | 19 | 0  | 87    | 7  | 6  | 0  | 90  | 9  | 0  | 0  | 78  | 7  | 15 | 0  | 75    | 10 | 15 | 0  | 79  | 14 | 7  | 0  | 76     | 7  | 17 | 0  |    |    |    |    |
| Spain, Andalusia                 | 40  | 3  | 56 | 0  | 7    | 2  | 90  | 0  | 25    | 3  | 72 | 0  | 28    | 3  | 69 | 0  | 44    | 4  | 52 | 0  | 73  | 4  | 23 | 0  | 40  | 3  | 57 | 0  | 41    | 4  | 55 | 0  | 61  | 4  | 35 | 0  | 36     | 3  | 61 | 0  |    |    |    |    |
| Spain, Aragon                    | 31  | 5  | 64 | 0  | 7    | 7  | 86  | 0  | 21    | 6  | 73 | 1  | 22    | 5  | 73 | 0  | 30    | 2  | 68 | 0  | 45  | 6  | 48 | 0  | 31  | 5  | 63 | 0  | 29    | 4  | 67 | 0  | 49  | 5  | 46 | 0  | 27     | 5  | 68 | 0  |    |    |    |    |
| Spain, Asturias                  | 38  | 6  | 57 | 0  | 8    | 8  | 85  | 0  | 17    | 2  | 82 | 0  | 28    | 5  | 67 | 0  | 36    | 7  | 57 | 0  | 64  | 5  | 31 | 0  | 38  | 5  | 57 | 0  | 38    | 6  | 56 | 0  | 56  | 5  | 40 | 0  | 34     | 6  | 60 | 0  |    |    |    |    |
| Spain, Basque country            | 27  | 5  | 68 | 0  | 6    | 0  | 94  | 0  | 16    | 5  | 79 | 0  | 18    | 4  | 77 | 0  | 25    | 6  | 69 | 0  | 50  | 7  | 43 | 0  | 28  | 6  | 66 | 0  | 24    | 5  | 71 | 0  | 53  | 6  | 41 | 0  | 23     | 5  | 72 | 0  |    |    |    |    |
| Spain, Canary Islands            | 46  | 6  | 47 | 0  | 18   | 18 | 65  | 0  | 31    | 7  | 62 | 0  | 36    | 6  | 58 | 0  | 48    | 8  | 44 | 0  | 73  | 6  | 21 | 0  | 46  | 6  | 47 | 0  | 47    | 7  | 46 | 0  | 60  | 6  | 34 | 0  | 41     | 7  | 52 | 0  |    |    |    |    |
| Spain, Cantabria *               | 33  | 6  | 61 | 0  |      |    |     |    | 17    | 8  | 75 | 0  | 19    | 3  | 78 | 0  | 30    | 8  | 62 | 0  | 66  | 7  | 27 | 0  | 34  | 6  | 61 | 0  | 31    | 6  | 63 | 0  | 49  | 8  | 43 | 0  | 30     | 5  | 65 | 0  |    |    |    |    |
| Spain, Castile and León *        | 36  | 5  | 57 | 2  |      |    |     |    | 22    | 4  | 73 | 1  | 24    | 4  | 71 | 0  | 34    | 5  | 60 | 1  | 57  | 5  | 33 | 5  | 37  | 5  | 56 | 2  | 34    | 5  | 59 | 2  | 53  | 5  | 39 | 4  | 33     | 5  | 61 | 2  |    |    |    |    |
| Spain, Castile-La Mancha *       | 37  | 6  | 57 | 0  |      |    |     |    | 18    | 7  | 75 | 0  | 26    | 7  | 66 | 0  | 37    | 6  | 57 | 0  | 64  | 4  | 33 | 0  | 38  | 6  | 55 | 0  | 35    | 5  | 59 | 0  | 56  | 8  | 37 | 0  | 33     | 6  | 61 | 0  |    |    |    |    |
| Spain, Catalonia                 | 36  | 4  | 60 | 0  | 6    | 1  | 93  | 0  | 21    | 3  | 76 | 0  | 23    | 4  | 74 | 0  | 35    | 4  | 61 | 0  | 65  | 5  | 30 | 0  | 36  | 4  | 59 | 0  | 36    | 4  | 60 | 0  | 53  | 5  | 42 | 0  | 34     | 4  | 63 | 0  |    |    |    |    |
| Spain, Community of Madrid       | 39  | 5  | 56 | 0  | 11   | 4  | 84  | 0  | 26    | 6  | 67 | 0  | 29    | 6  | 66 | 0  | 40    | 5  | 55 | 0  | 64  | 5  | 32 | 0  | 41  | 6  | 54 | 0  | 35    | 5  | 60 | 0  | 58  | 5  | 37 | 0  | 35     | 6  | 60 | 0  |    |    |    |    |
| Spain, Extremadura               | 49  | 3  | 47 | 0  | 13   | 0  | 88  | 0  | 24    | 4  | 72 | 0  | 39    | 4  | 56 | 0  | 54    | 3  | 43 | 0  | 76  | 2  | 21 | 0  | 50  | 3  | 46 | 0  | 48    | 4  | 48 | 0  | 69  | 3  | 28 | 0  | 46     | 4  | 51 | 0  |    |    |    |    |
| Spain, Galicia                   | 42  | 7  | 51 | 0  | 7    | 7  | 87  | 0  | 25    | 6  | 69 | 0  | 28    | 6  | 65 | 0  | 45    | 7  | 48 | 0  | 71  | 9  | 21 | 0  | 43  | 7  | 50 | 0  | 42    | 7  | 51 | 0  | 62  | 6  | 32 | 0  | 38     | 7  | 54 | 0  |    |    |    |    |
| Spain, La Rioja                  | 34  | 4  | 62 | 0  | 0    | 0  | 100 | 0  | 20    | 4  | 76 | 0  | 18    | 5  | 77 | 0  | 32    | 5  | 63 | 0  | 66  | 4  | 30 | 0  | 34  | 4  | 62 | 0  | 33    | 5  | 61 | 0  | 63  | 6  | 31 | 0  | 30     | 4  | 66 | 0  |    |    |    |    |
| Spain, Murcia                    | 50  | 5  | 45 | 0  | 14   | 14 | 71  | 0  | 39    | 8  | 54 | 0  | 36    | 5  | 59 | 0  | 47    | 5  | 48 | 0  | 83  | 3  | 14 | 0  | 50  | 5  | 45 | 0  | 49    | 4  | 47 | 0  | 73  | 4  | 23 | 0  | 46     | 5  | 49 | 0  |    |    |    |    |
| Spain, Navarre *                 | 34  | 4  | 62 | 0  |      |    |     |    | 21    | 7  | 73 | 0  | 21    | 2  | 78 | 0  | 33    | 5  | 62 | 0  | 63  | 6  | 32 | 0  | 37  | 4  | 59 | 0  | 28    | 5  | 68 | 0  | 56  | 7  | 36 | 0  | 30     | 4  | 67 | 0  |    |    |    |    |
| Spain, Valencian region          | 49  | 6  | 45 | 0  | 6    | 4  | 90  | 0  | 26    | 6  | 68 | 0  | 36    | 6  | 57 | 0  | 48    | 7  | 45 | 0  | 77  | 6  | 17 | 0  | 49  | 7  | 44 | 0  | 48    | 5  | 47 | 0  | 67  | 6  | 26 | 0  | 45     | 6  | 48 | 0  |    |    |    |    |
| Sweden                           | 31  | 9  | 60 | 0  | 7    | 6  | 87  | 0  | 19    | 6  | 75 | 0  | 23    | 6  | 71 | 0  | 33    | 10 | 57 | 0  | 56  | 17 | 28 | 0  | 31  | 10 | 59 | 0  | 30    | 8  | 62 | 0  | 45  | 12 | 43 | 0  | 28     | 8  | 64 | 0  |    |    |    |    |
| Switzerland                      | 41  | 4  | 55 | 0  | 6    | 4  | 90  | 1  | 23    | 3  | 74 | 0  | 28    | 3  | 68 | 0  | 42    | 4  | 54 | 0  | 72  | 5  | 24 | 0  | 42  | 4  | 54 | 0  | 39    | 4  | 57 | 0  | 57  | 4  | 39 | 0  | 38     | 4  | 58 | 0  |    |    |    |    |
| the Netherlands                  | 29  | 6  | 65 | 0  | 7    | 6  | 87  | 0  | 17    | 4  | 80 | 0  | 20    | 4  | 76 | 0  | 30    | 6  | 64 | 0  | 57  | 9  | 34 | 0  | 29  | 6  | 65 | 0  | 30    | 6  | 65 | 0  | 49  | 7  | 44 | 0  | 26     | 5  | 68 | 0  |    |    |    |    |
| United Kingdom, England          | 38  | 6  | 56 | 0  | 13   | 11 | 75  | 0  | 25    | 5  | 70 | 0  | 31    | 5  | 64 | 0  | 42    | 6  | 52 | 0  | 69  | 9  | 22 | 0  | 38  | 6  | 56 | 0  | 37    | 6  | 57 | 0  | 56  | 8  | 36 | 0  | 34     | 6  | 60 | 0  |    |    |    |    |
| United Kingdom, Northern Ireland | 28  | 2  | 70 | 0  | 0    | 0  | 92  | 0  | 13    | 2  | 86 | 0  | 19    | 1  | 80 | 0  | 34    | 2  | 64 | 0  | 64  | 7  | 29 | 0  | 29  | 2  | 69 | 0  | 27    | 2  | 71 | 0  | 46  | 4  | 50 | 0  | 25     | 2  | 73 | 0  |    |    |    |    |
| United Kingdom, Scotland         | 35  | 4  | 62 | 0  | 13   | 8  | 79  | 0  | 20    | 3  | 77 | 0  | 28    | 3  | 69 | 0  | 43    | 4  | 53 | 0  | 69  | 5  | 25 | 0  | 35  | 4  | 61 | 0  | 34    | 4  | 62 | 0  | 54  | 5  | 42 | 0  | 31     | 3  | 66 | 0  |    |    |    |    |
| United Kingdom, Wales            | 39  | 6  | 55 | 0  | 22   |    | 74  | 0  | 27    | 5  | 68 | 0  | 32    | 4  | 63 | 0  | 44    | 7  | 49 | 0  | 65  | 8  | 27 | 0  | 39  | 6  | 56 | 0  | 39    | 6  | 55 | 0  | 57  | 7  | 36 | 0  | 35     | 5  | 60 | 0  |    |    |    |    |

Abbreviations used: HD: haemodialysis; PD: peritoneal dialysis; Tx: transplant; Un: unknown; DM: diabetes mellitus  
 Categories may not add up because of missing values or rounding off  
 § The prevalence is underestimated by approximately 1% due to an estimated 1.2% underestimation of the prevalence of haemodialysis  
 \* Patients younger than 20 years of age are not reported  
 // The prevalence of patients living on a functioning graft is underestimated by approximately 30%

Table B.5.1  
Kidney transplant counts and percentages by donor type

|                                    | All  |     | Living donor |      |           |      |           |      | Deceased donor |      | Donor type Unkn |      |    |     |
|------------------------------------|------|-----|--------------|------|-----------|------|-----------|------|----------------|------|-----------------|------|----|-----|
|                                    | N    | %   | Related      |      | Unrelated |      | Type Unkn |      | All            |      | N               | %    | N  | %   |
|                                    |      |     | N            | %    | N         | %    | N         | %    | N              | %    |                 |      |    |     |
| Austria §                          | 313  | 100 | 30           | 9.6  | 13        | 4.2  | 0         | 0    | 43             | 13.7 | 270             | 86.3 | 0  | 0   |
| Belgium, Dutch-speaking *          | 197  | 100 | 9            | 4.6  | 7         | 3.6  | 0         | 0    | 16             | 8.1  | 181             | 91.9 | 0  | 0   |
| Belgium, French-speaking *         | 111  | 100 | 4            | 3.6  | 9         | 8.1  | 0         | 0    | 13             | 11.7 | 97              | 87.4 | 1  | 0.9 |
| Bosnia and Herzegovina             | 10   | 100 | 6            | 60.0 | 2         | 20.0 | 0         | 0    | 8              | 80.0 | 2               | 20.0 | 0  | 0   |
| Denmark                            | 278  | 100 | 39           | 14.0 | 37        | 13.3 | 0         | 0    | 76             | 27.3 | 202             | 72.7 | 0  | 0   |
| Estonia                            | 49   | 100 | 3            | 6.1  | 2         | 4.1  | 0         | 0    | 5              | 10.2 | 44              | 89.8 | 0  | 0   |
| Finland                            | 264  | 100 | 18           | 6.8  | 13        | 4.9  | 0         | 0    | 31             | 11.7 | 230             | 87.1 | 3  | 1.1 |
| France                             | 2597 | 100 | 247          | 9.5  | 143       | 5.5  | 0         | 0    | 390            | 15.0 | 2205            | 84.9 | 2  | 0.1 |
| Greece                             | 182  | 100 | 65           | 35.7 | 25        | 13.7 | 0         | 0    | 90             | 49.5 | 92              | 50.5 | 0  | 0   |
| Iceland                            | 10   | 100 | 5            | 50.0 | 2         | 20.0 | 0         | 0    | 7              | 70.0 | 3               | 30.0 | 0  | 0   |
| Montenegro *                       | 0    | 0   | 0            | 0    | 0         | 0    | 0         | 0    | 0              | 0    | 0               | 0    | 0  | 0   |
| Norway                             | 240  | 100 | 41           | 17.1 | 16        | 6.7  | 0         | 0    | 57             | 23.8 | 182             | 75.8 | 1  | 0.4 |
| Romania //                         | 188  | 100 |              |      |           |      | 58        | 30.9 | 58             | 30.9 | 130             | 69.1 | 0  | 0   |
| Serbia □                           | 7    | 100 | 2            | 28.6 | 0         | 0    | 0         | 0    | 2              | 28.6 | 5               | 71.4 | 0  | 0   |
| Spain, Andalusia                   | 424  | 100 | 20           | 4.7  | 0         | 0    | 9         | 2.1  | 29             | 6.8  | 395             | 93.2 | 0  | 0   |
| Spain, Aragon                      | 56   | 100 | 6            | 10.7 | 2         | 3.6  | 0         | 0    | 8              | 14.3 | 48              | 85.7 | 0  | 0   |
| Spain, Asturias                    | 83   | 100 | 0            | 0    | 1         | 1.2  | 0         | 0    | 1              | 1.2  | 82              | 98.8 | 0  | 0   |
| Spain, Basque country              | 152  | 100 | 24           | 15.8 | 1         | 0.7  | 0         | 0    | 25             | 16.4 | 127             | 83.6 | 0  | 0   |
| Spain, Canary Islands              | 147  | 100 |              |      |           |      | 3         | 2.0  | 3              | 2.0  | 144             | 98.0 | 0  | 0   |
| Spain, Cantabria *                 | 63   | 100 | 0            | 0    | 1         | 1.6  | 0         | 0    | 1              | 1.6  | 62              | 98.4 | 0  | 0   |
| Spain, Castile and León *          | 111  | 100 | 0            | 0    | 1         | 0.9  | 8         | 7.2  | 9              | 8.1  | 102             | 91.9 | 0  | 0   |
| Spain, Castile-La Mancha *         | 57   | 100 | 0            | 0    | 0         | 0    | 0         | 0    | 0              | 0    | 57              | 100  | 0  | 0   |
| Spain, Catalonia                   | 679  | 100 | 59           | 8.7  | 54        | 8.0  | 0         | 0    | 113            | 16.6 | 566             | 83.4 | 0  | 0   |
| Spain, Community of Madrid         | 330  | 100 | 19           | 5.8  | 7         | 2.1  | 0         | 0    | 26             | 7.9  | 304             | 92.1 | 0  | 0   |
| Spain, Extremadura                 | 43   | 100 | 1            | 2.3  | 0         | 0    | 0         | 0    | 1              | 2.3  | 42              | 97.7 | 0  | 0   |
| Spain, Galicia                     | 141  | 100 | 16           | 11.3 | 1         | 0.7  | 0         | 0    | 17             | 12.1 | 124             | 87.9 | 0  | 0   |
| Spain, La Rioja                    | 16   | 100 |              |      |           |      | 2         | 12.5 | 2              | 12.5 | 14              | 87.5 | 0  | 0   |
| Spain, Murcia                      | 70   | 100 | 0            | 0    | 1         | 1.4  | 0         | 0    | 1              | 1.4  | 69              | 98.6 | 0  | 0   |
| Spain, Navarre *                   | 30   | 100 |              |      |           |      | 1         | 3.3  | 1              | 3.3  | 29              | 96.7 | 0  | 0   |
| Spain, Valencian region            | 233  | 100 | 2            | 0.9  | 3         | 1.3  | 8         | 3.4  | 13             | 5.6  | 220             | 94.4 | 0  | 0   |
| Sweden                             | 419  | 100 | 81           | 19.3 | 35        | 8.4  | 0         | 0    | 116            | 27.7 | 303             | 72.3 | 0  | 0   |
| Switzerland                        | 293  | 100 | 40           | 13.7 | 37        | 12.6 | 1         | 0.3  | 78             | 26.6 | 215             | 73.4 | 0  | 0   |
| the Netherlands ‡                  | 787  | 100 |              |      |           |      | 363       | 46.1 | 363            | 46.1 | 424             | 53.9 | 0  | 0   |
| United Kingdom, England #          | 2005 | 100 | 225          | 11.2 | 128       | 6.4  | 71        | 3.5  | 424            | 21.1 | 1562            | 77.9 | 19 | 0.9 |
| United Kingdom, Northern Ireland # | 155  | 100 | 23           | 14.8 | 8         | 5.2  | 0         | 0    | 31             | 20.0 | 124             | 80.0 | 0  | 0   |
| United Kingdom, Scotland           | 235  | 100 | 0            | 0    | 0         | 0    | 0         | 0    | 71             | 30.2 | 164             | 69.8 | 0  | 0   |
| United Kingdom, Wales #            | 63   | 100 | 8            | 12.7 | 10        | 15.9 | 0         | 0    | 18             | 28.6 | 45              | 71.4 | 0  | 0   |

Categories may not add up because of rounding off; When cells are left empty, (complete) data are unavailable

§ Data based on residents and non-residents

\* Patients younger than 20 years of age are not reported

// The transplant activity is underestimated by approximately 30%

□ The transplant activity is underestimated by approximately 16% for deceased donor transplants and by approximately 12% for living donor transplants due to centers not submitting complete data

‡ The transplant activity is underestimated by approximately 2%

# Values based on 1 to 5 patients are suppressed

Table B.5.2  
Kidney transplants per million population by donor type, unadjusted

|                                    | All   | Living donor |           |           | Deceased donor | Donor type Unkn |     |
|------------------------------------|-------|--------------|-----------|-----------|----------------|-----------------|-----|
|                                    | Pmp   | Related      | Unrelated | Type Unkn | All            | Pmp             |     |
|                                    |       | Pmp          | Pmp       | Pmp       | Pmp            |                 |     |
| Austria §                          | 34.5  | 3.4          | 1.5       | 0         | 4.8            | 29.7            | 0   |
| Belgium, Dutch-speaking *          | 29.6  | 1.4          | 1.1       | 0         | 2.4            | 27.2            | 0   |
| Belgium, French-speaking *         | 22.7  | 0.8          | 1.8       | 0         | 2.7            | 19.8            | 0.2 |
| Bosnia and Herzegovina             | 2.8   | 1.7          | 0.6       | 0         | 2.3            | 0.6             | 0   |
| Denmark                            | 47.2  | 6.6          | 6.3       | 0         | 12.9           | 34.3            | 0   |
| Estonia                            | 36.9  | 2.3          | 1.5       | 0         | 3.8            | 33.1            | 0   |
| Finland                            | 47.7  | 3.3          | 2.4       | 0         | 5.6            | 41.6            | 0.5 |
| France                             | 38.5  | 3.7          | 2.1       | 0         | 5.8            | 32.7            | 0   |
| Greece                             | 17.0  | 6.1          | 2.3       | 0         | 8.4            | 8.6             | 0   |
| Iceland                            | 27.3  | 13.6         | 5.5       | 0         | 19.1           | 8.2             | 0   |
| Montenegro *                       | 0     | 0            | 0         | 0         | 0              | 0               | 0   |
| Norway                             | 44.6  | 7.6          | 3.0       | 0         | 10.6           | 33.8            | 0.2 |
| Romania //                         | 10.3  |              |           | 3.2       | 3.2            | 7.1             | 0   |
| Serbia ☐                           | 1.1   | 0.3          | 0         | 0         | 0.3            | 0.8             | 0   |
| Spain, Andalusia                   | 49.9  | 2.4          | 0         | 1.1       | 3.4            | 46.5            | 0   |
| Spain, Aragon                      | 42.1  | 4.5          | 1.5       | 0         | 6.0            | 36.1            | 0   |
| Spain, Asturias                    | 81.7  | 0            | 1.0       | 0         | 1.0            | 80.7            | 0   |
| Spain, Basque country              | 69.5  | 11.0         | 0.5       | 0         | 11.4           | 58.1            | 0   |
| Spain, Canary Islands              | 65.6  |              |           | 1.3       | 1.3            | 64.3            | 0   |
| Spain, Cantabria *                 | 108.1 | 0            | 1.7       | 0         | 1.7            | 106.3           | 0   |
| Spain, Castile and León *          | 46.3  | 0            | 0.4       | 3.3       | 3.8            | 42.6            | 0   |
| Spain, Castile-La Mancha *         | 27.8  | 0            | 0         | 0         | 0              | 27.8            | 0   |
| Spain, Catalonia                   | 87.3  | 7.6          | 6.9       | 0         | 14.5           | 72.7            | 0   |
| Spain, Community of Madrid         | 48.7  | 2.8          | 1.0       | 0         | 3.8            | 44.8            | 0   |
| Spain, Extremadura                 | 40.4  | 0.9          | 0         | 0         | 0.9            | 39.5            | 0   |
| Spain, Galicia                     | 52.2  | 5.9          | 0.4       | 0         | 6.3            | 45.9            | 0   |
| Spain, La Rioja                    | 50.6  |              |           | 6.3       | 6.3            | 44.3            | 0   |
| Spain, Murcia                      | 46.3  | 0            | 0.7       | 0         | 0.7            | 45.7            | 0   |
| Spain, Navarre *                   | 45.7  |              |           | 1.5       | 1.5            | 44.1            | 0   |
| Spain, Valencian region            | 46.1  | 0.4          | 0.6       | 1.6       | 2.6            | 43.5            | 0   |
| Sweden                             | 40.5  | 7.8          | 3.4       | 0         | 11.2           | 29.3            | 0   |
| Switzerland                        | 33.9  | 4.6          | 4.3       | 0.1       | 9.0            | 24.9            | 0   |
| the Netherlands                    | 46.0  |              |           | 21.2      | 21.2           | 24.8            | 0   |
| United Kingdom, England #          | 35.5  | 4.0          | 2.3       | 1.3       | 7.5            | 27.6            | 0.3 |
| United Kingdom, Northern Ireland # | 81.8  | 12.1         | 4.2       | 0         | 16.4           | 65.4            | 0   |
| United Kingdom, Scotland           | 43.0  | 0            | 0         | 0         | 13.0           | 30.0            | 0   |
| United Kingdom, Wales #            | 19.9  | 2.5          | 3.2       | 0         | 5.7            | 14.2            | 0   |

Categories may not add up because of rounding off; When cells are left empty, (complete) data are unavailable

§ The number of transplants differs from table B.5.1 as non-residents are excluded for this analysis

\* Patients younger than 20 years of age are not reported

// The transplant activity is underestimated by approximately 30%

☐ The transplant activity is underestimated by approximately 16% for deceased donor transplants and by approximately 12% for living donor transplants due to centers not submitting complete data

# Values based on 1 to 5 patients are suppressed

Table B.5.3  
**Sex, mean age, and median age of kidney transplant recipients**  
*at time of transplantation*

|                                  | All |              |      |                |      |      | Men  |              |      |                |      |      | Women |              |      |                |      |      |
|----------------------------------|-----|--------------|------|----------------|------|------|------|--------------|------|----------------|------|------|-------|--------------|------|----------------|------|------|
|                                  | %   | Mean (years) | SD   | Median (years) | P25  | P75  | %    | Mean (years) | SD   | Median (years) | P25  | P75  | %     | Mean (years) | SD   | Median (years) | P25  | P75  |
| Austria                          | 100 | 52.8         | 15.2 | 56.2           | 43.9 | 64.4 | 65.2 | 53.1         | 15.0 | 56.2           | 45.2 | 64.2 | 34.8  | 52.3         | 15.6 | 56.2           | 42.7 | 64.9 |
| Belgium, Dutch-speaking *        | 100 | 55.4         | 11.6 | 56.8           | 48.3 | 64.0 | 60.9 | 56.0         | 11.4 | 56.6           | 49.4 | 64.5 | 39.1  | 54.5         | 12.0 | 57.1           | 47.6 | 62.4 |
| Belgium, French-speaking *       | 100 | 53.8         | 13.8 | 55.4           | 45.1 | 65.8 | 62.2 | 56.8         | 12.8 | 59.9           | 49.6 | 66.9 | 37.8  | 49.0         | 14.1 | 51.1           | 36.3 | 60.7 |
| Bosnia and Herzegovina           | 100 | 44.4         | 10.6 | 43.3           | 36.7 | 52.8 | 60.0 | 47.7         | 7.9  | 49.9           | 39.0 | 52.8 | 40.0  | 39.5         | 13.4 | 35.1           | 31.2 | 47.8 |
| Denmark                          | 100 | 51.6         | 15.7 | 53.9           | 42.2 | 62.9 | 63.7 | 50.7         | 16.5 | 52.7           | 42.2 | 62.6 | 36.3  | 53.4         | 14.1 | 55.4           | 42.4 | 64.0 |
| Estonia                          | 100 | 49.6         | 16.6 | 50.7           | 39.2 | 62.9 | 51.0 | 52.2         | 15.2 | 56.5           | 41.9 | 64.4 | 49.0  | 46.9         | 17.8 | 46.1           | 34.0 | 61.1 |
| Finland                          | 100 | 50.8         | 16.8 | 54.7           | 38.3 | 63.3 | 58.7 | 51.7         | 16.6 | 55.6           | 39.4 | 64.1 | 41.3  | 49.6         | 16.9 | 54.1           | 36.0 | 63.0 |
| France                           | 100 | 52.4         | 16.6 | 54.5           | 41.2 | 65.2 | 62.5 | 53.0         | 16.5 | 54.9           | 41.4 | 65.7 | 37.5  | 51.5         | 16.6 | 53.8           | 40.7 | 64.5 |
| Greece                           | 100 | 45.8         | 15.4 | 48.6           | 36.5 | 57.9 | 65.4 | 44.7         | 15.4 | 44.4           | 34.8 | 57.2 | 34.6  | 47.8         | 15.3 | 53.1           | 38.1 | 59.4 |
| Iceland                          | 100 | 51.4         | 20.4 | 57.4           | 46.2 | 60.8 | 50.0 | 52.5         | 28.6 | 60.8           | 58.8 | 68.1 | 50.0  | 50.3         | 10.5 | 55.4           | 46.2 | 55.9 |
| Montenegro *                     | 0   | 0            | 0    | 0              | 0    | 0    | 0    | 0            | 0    | 0              | 0    | 0    | 0     | 0            | 0    | 0              | 0    | 0    |
| Norway                           | 100 | 52.1         | 16.2 | 54.5           | 42.8 | 64.1 | 60.0 | 52.9         | 17.1 | 56.9           | 45.4 | 64.6 | 40.0  | 50.8         | 14.8 | 49.8           | 39.6 | 62.5 |
| Romania                          | 100 | 41.9         | 13.5 | 44.4           | 35.8 | 51.4 | 65.4 | 42.2         | 13.4 | 44.9           | 35.6 | 51.5 | 34.6  | 41.3         | 13.9 | 43.8           | 35.9 | 51.1 |
| Serbia                           | 100 | 36.9         | 15.7 | 39.2           | 26.9 | 52.7 | 57.1 | 31.9         | 19.3 | 33.6           | 17.3 | 46.5 | 42.9  | 43.7         | 8.1  | 39.2           | 38.9 | 53.0 |
| Spain, Andalusia                 | 100 | 52.9         | 16.2 | 56.9           | 44.8 | 64.7 | 65.1 | 53.0         | 15.9 | 56.6           | 45.3 | 64.5 | 34.9  | 52.8         | 16.8 | 57.4           | 43.7 | 64.8 |
| Spain, Aragon                    | 100 | 55.2         | 15.9 | 58.8           | 46.8 | 66.6 | 66.1 | 57.6         | 15.3 | 59.3           | 50.3 | 69.5 | 33.9  | 50.5         | 16.4 | 54.4           | 37.4 | 61.3 |
| Spain, Asturias                  | 100 | 58.7         | 14.3 | 63.5           | 50.1 | 69.8 | 78.3 | 58.4         | 15.2 | 63.6           | 50.1 | 68.2 | 21.7  | 59.7         | 11.0 | 57.1           | 51.0 | 70.6 |
| Spain, Basque country            | 100 | 53.1         | 17.8 | 56.2           | 43.6 | 66.8 | 64.5 | 55.3         | 17.5 | 59.2           | 49.3 | 67.7 | 35.5  | 49.0         | 17.8 | 49.4           | 42.0 | 63.4 |
| Spain, Canary Islands            | 100 | 56.1         | 12.7 | 56.9           | 48.6 | 67.0 | 61.2 | 54.4         | 12.0 | 55.6           | 46.7 | 62.7 | 38.8  | 58.8         | 13.4 | 61.2           | 51.0 | 67.6 |
| Spain, Cantabria *               | 100 | 56.7         | 12.2 | 59.3           | 49.6 | 65.5 | 66.7 | 57.3         | 11.6 | 59.8           | 49.6 | 66.5 | 33.3  | 55.5         | 13.4 | 58.8           | 54.5 | 64.3 |
| Spain, Castile and León *        | 100 | 59.3         | 12.1 | 60.9           | 53.3 | 68.2 | 61.3 | 59.5         | 12.5 | 62.4           | 52.9 | 68.4 | 38.7  | 59.0         | 11.6 | 58.7           | 53.7 | 67.5 |
| Spain, Castile-La Mancha *       | 100 | 56.9         | 13.6 | 58.7           | 48.9 | 67.4 | 61.4 | 57.9         | 13.5 | 60.5           | 49.8 | 68.1 | 38.6  | 55.4         | 13.8 | 55.1           | 46.6 | 65.6 |
| Spain, Catalonia                 | 100 | 57.2         | 16.1 | 59.6           | 48.9 | 69.8 | 67.7 | 57.9         | 16.1 | 60.9           | 49.8 | 70.0 | 32.3  | 55.6         | 16.1 | 57.7           | 46.0 | 68.3 |
| Spain, Community of Madrid       | 100 | 54.6         | 16.3 | 56.1           | 43.6 | 68.1 | 61.2 | 55.1         | 16.6 | 59.0           | 43.5 | 68.4 | 38.8  | 53.9         | 15.9 | 53.1           | 44.6 | 66.2 |
| Spain, Extremadura               | 100 | 59.0         | 12.4 | 60.6           | 53.5 | 67.3 | 65.1 | 58.1         | 13.4 | 61.7           | 53.2 | 67.0 | 34.9  | 60.6         | 10.6 | 59.6           | 55.4 | 68.4 |
| Spain, Galicia                   | 100 | 56.8         | 13.1 | 58.4           | 46.5 | 68.0 | 66.0 | 58.4         | 14.0 | 61.9           | 50.2 | 70.3 | 34.0  | 53.8         | 10.4 | 53.8           | 45.3 | 62.8 |
| Spain, La Rioja                  | 100 | 59.5         | 14.1 | 59.0           | 48.5 | 70.2 | 81.3 | 57.9         | 13.8 | 55.1           | 48.1 | 68.4 | 18.8  | 66.5         | 16.1 | 69.7           | 49.0 | 80.7 |
| Spain, Murcia                    | 100 | 53.4         | 11.6 | 53.1           | 45.5 | 59.9 | 70.0 | 54.1         | 11.3 | 54.3           | 45.2 | 61.2 | 30.0  | 51.6         | 12.5 | 52.2           | 49.8 | 55.8 |
| Spain, Navarre *                 | 100 | 51.7         | 14.7 | 55.1           | 38.2 | 62.8 | 56.7 | 55.1         | 12.8 | 55.5           | 48.6 | 61.7 | 43.3  | 47.2         | 16.2 | 40.4           | 34.1 | 62.8 |
| Spain, Valencian region          | 100 | 54.9         | 15.0 | 57.0           | 46.4 | 66.0 | 62.7 | 55.1         | 15.3 | 58.3           | 45.7 | 67.2 | 37.3  | 54.4         | 14.6 | 55.3           | 47.4 | 63.5 |
| Sweden                           | 100 | 51.1         | 16.5 | 54.2           | 41.2 | 62.8 | 64.4 | 50.9         | 16.1 | 53.8           | 39.9 | 62.4 | 35.6  | 51.3         | 17.4 | 55.2           | 42.9 | 62.9 |
| Switzerland                      | 100 | 51.0         | 15.1 | 53.2           | 41.1 | 61.9 | 62.5 | 49.4         | 15.3 | 51.9           | 39.7 | 60.7 | 37.5  | 53.8         | 14.2 | 56.9           | 45.2 | 64.5 |
| the Netherlands                  | 100 | 53.5         | 15.5 | 55.9           | 44.4 | 65.5 | 61.1 | 54.5         | 14.9 | 56.6           | 45.8 | 66.4 | 38.9  | 51.9         | 16.3 | 54.6           | 41.2 | 64.6 |
| United Kingdom, England          | 100 | 49.9         | 16.3 | 52.6           | 38.7 | 62.6 | 61.6 | 50.5         | 16.2 | 52.9           | 38.8 | 63.2 | 38.4  | 48.9         | 16.3 | 51.8           | 38.2 | 61.3 |
| United Kingdom, Northern Ireland | 100 | 51.8         | 16.7 | 55.1           | 44.7 | 64.2 | 61.3 | 49.8         | 17.5 | 52.6           | 42.0 | 64.0 | 38.7  | 55.0         | 14.8 | 57.3           | 48.0 | 65.4 |
| United Kingdom, Scotland         | 100 | 48.0         | 15.0 | 49.0           | 37.0 | 59.0 | 56.6 | 47.0         | 16.0 | 49.0           | 35.0 | 60.0 | 43.4  | 48.0         | 14.0 | 50.0           | 39.0 | 59.0 |
| United Kingdom, Wales            | 100 | 46.8         | 14.5 | 49.3           | 34.8 | 56.1 | 60.3 | 44.0         | 14.5 | 45.7           | 34.0 | 53.5 | 39.7  | 51.2         | 13.7 | 54.5           | 42.0 | 59.9 |

*Categories may not add up because of missing values or rounding off*

*\* Patients younger than 20 years of age are not reported*

Table B.6.1  
**Incident KRT patients, from day 1, unadjusted**  
*by age, sex, and primary renal disease*

|                                       | Survival probabilities as % (95% CI) |                  |                  |                  |                    |                  |                  |
|---------------------------------------|--------------------------------------|------------------|------------------|------------------|--------------------|------------------|------------------|
|                                       | cohort 2011 - 2015                   |                  |                  |                  | cohort 2014 - 2018 |                  |                  |
|                                       | 90 day                               | 1 year           | 2 year           | 5 year           | 90 day             | 1 year           | 2 year           |
| 0-19                                  | 99.1 (98.6-99.4)                     | 98.3 (97.6-98.7) | 97.1 (96.3-97.7) | 95.1 (94.2-95.9) | 99.5 (99.1-99.7)   | 98.1 (97.5-98.6) | 97.3 (96.5-97.8) |
| 20-44                                 | 99.1 (99.0-99.3)                     | 97.2 (97.0-97.4) | 95.0 (94.7-95.3) | 89.5 (89.0-89.9) | 99.2 (99.1-99.3)   | 97.1 (96.8-97.3) | 94.8 (94.5-95.1) |
| 45-64                                 | 97.3 (97.2-97.4)                     | 91.3 (91.1-91.6) | 85.2 (84.9-85.5) | 69.1 (68.7-69.5) | 97.5 (97.4-97.7)   | 92.0 (91.8-92.2) | 85.8 (85.5-86.1) |
| 65-74                                 | 94.7 (94.4-94.9)                     | 84.0 (83.7-84.4) | 73.2 (72.7-73.6) | 46.3 (45.8-46.8) | 95.2 (95.0-95.4)   | 84.9 (84.6-85.2) | 74.1 (73.7-74.5) |
| 75+                                   | 90.7 (90.4-90.9)                     | 74.5 (74.1-74.9) | 58.6 (58.2-59.0) | 25.2 (24.8-25.6) | 91.5 (91.2-91.7)   | 75.8 (75.4-76.1) | 60.1 (59.7-60.5) |
| Men                                   | 94.8 (94.6-94.9)                     | 84.8 (84.5-85.0) | 74.5 (74.3-74.8) | 50.8 (50.5-51.1) | 95.2 (95.0-95.3)   | 85.3 (85.1-85.5) | 75.1 (74.8-75.3) |
| Women                                 | 94.7 (94.5-94.9)                     | 84.9 (84.6-85.2) | 75.4 (75.1-75.8) | 53.5 (53.1-53.9) | 95.2 (95.0-95.3)   | 85.9 (85.7-86.2) | 76.5 (76.2-76.8) |
| Diabetes                              | 95.6 (95.4-95.8)                     | 85.9 (85.6-86.3) | 74.2 (73.8-74.7) | 45.3 (44.8-45.8) | 96.1 (95.9-96.3)   | 86.6 (86.3-86.9) | 74.9 (74.5-75.3) |
| Hypertension / renal vascular disease | 94.4 (94.2-94.7)                     | 83.3 (82.8-83.7) | 71.2 (70.7-71.7) | 43.4 (42.8-43.9) | 95.0 (94.7-95.2)   | 84.4 (84.0-84.7) | 72.7 (72.2-73.1) |
| Glomerulonephritis                    | 97.5 (97.2-97.7)                     | 92.4 (92.0-92.7) | 87.2 (86.7-87.6) | 73.0 (72.4-73.6) | 97.8 (97.6-98.0)   | 93.2 (92.8-93.5) | 88.1 (87.6-88.5) |
| Other causes                          | 94.0 (93.8-94.2)                     | 83.4 (83.1-83.7) | 74.0 (73.7-74.3) | 53.6 (53.2-53.9) | 94.4 (94.3-94.6)   | 84.1 (83.8-84.3) | 74.5 (74.2-74.8) |
| All                                   | 94.7 (94.6-94.8)                     | 84.8 (84.6-85.0) | 74.8 (74.6-75.1) | 51.8 (51.6-52.0) | 95.2 (95.1-95.3)   | 85.5 (85.4-85.7) | 75.6 (75.4-75.8) |

*\* Based on data from Austria, Belgium (Dutch-speaking), Belgium (French-speaking), Bosnia and Herzegovina, Denmark, Estonia, Finland, France, Greece, Iceland, Norway, Spain (Andalusia), Spain (Aragon), Spain (Asturias), Spain (Basque country), Spain (Cantabria), Spain (Castile and León), Spain (Castile-La Mancha), Spain (Catalonia), Spain (Community of Madrid), Spain (Extremadura), Spain (Galicia), Spain (Murcia), Spain (Valencian Region), Sweden, the Netherlands, United Kingdom (England/Northern Ireland/Wales) and United Kingdom (Scotland)*

Table B.6.2  
**Incident KRT patients, from day 1, adjusted**  
*adjusted for age, sex, and primary renal disease*

|                                       | Survival probabilities as % (95% CI) |                  |                  |                  |                    |                  |                  |
|---------------------------------------|--------------------------------------|------------------|------------------|------------------|--------------------|------------------|------------------|
|                                       | cohort 2011 - 2015                   |                  |                  |                  | cohort 2014 - 2018 |                  |                  |
|                                       | 90 day                               | 1 year           | 2 year           | 5 year           | 90 day             | 1 year           | 2 year           |
| 0-19                                  | 99.2 (98.9-99.6)                     | 98.3 (97.8-98.9) | 97.2 (96.5-97.9) | 95.1 (94.2-96.0) | 99.5 (99.2-99.8)   | 98.1 (97.5-98.6) | 97.3 (96.6-97.9) |
| 20-44                                 | 99.2 (99.1-99.3)                     | 97.2 (96.9-97.4) | 94.9 (94.6-95.3) | 89.0 (88.5-89.5) | 99.2 (99.1-99.4)   | 97.0 (96.8-97.3) | 94.7 (94.4-95.1) |
| 45-64                                 | 97.4 (97.3-97.6)                     | 91.6 (91.3-91.8) | 85.5 (85.2-85.9) | 69.4 (69.0-69.8) | 97.7 (97.6-97.8)   | 92.3 (92.1-92.6) | 86.2 (85.9-86.5) |
| 65-74                                 | 95.0 (94.8-95.2)                     | 84.8 (84.5-85.2) | 74.2 (73.8-74.6) | 47.5 (47.0-47.9) | 95.5 (95.4-95.7)   | 85.7 (85.3-86.0) | 75.1 (74.7-75.5) |
| 75+                                   | 91.0 (90.8-91.3)                     | 75.2 (74.8-75.6) | 59.5 (59.1-59.9) | 25.9 (25.5-26.3) | 91.9 (91.7-92.1)   | 76.6 (76.2-76.9) | 61.1 (60.7-61.5) |
| Men                                   | 95.9 (95.8-96.0)                     | 87.4 (87.2-87.6) | 78.0 (77.8-78.3) | 52.6 (52.2-52.9) | 96.2 (96.1-96.3)   | 87.9 (87.7-88.0) | 78.5 (78.2-78.7) |
| Women                                 | 95.9 (95.8-96.0)                     | 87.8 (87.6-88.0) | 79.2 (78.9-79.6) | 56.1 (55.7-56.5) | 96.2 (96.1-96.4)   | 88.5 (88.2-88.7) | 79.9 (79.6-80.2) |
| Diabetes                              | 96.2 (96.0-96.4)                     | 87.5 (87.2-87.9) | 76.6 (76.2-77.0) | 46.4 (45.9-46.9) | 96.7 (96.5-96.8)   | 88.2 (87.9-88.5) | 77.4 (77.0-77.8) |
| Hypertension / renal vascular disease | 96.6 (96.4-96.7)                     | 89.3 (89.0-89.6) | 80.7 (80.3-81.1) | 55.9 (55.4-56.5) | 96.8 (96.7-97.0)   | 89.7 (89.4-90.0) | 81.2 (80.8-81.6) |
| Glomerulonephritis                    | 97.0 (96.8-97.3)                     | 90.9 (90.5-91.4) | 84.5 (83.9-85.0) | 65.5 (64.7-66.2) | 97.5 (97.3-97.7)   | 92.0 (91.6-92.4) | 85.8 (85.3-86.3) |
| Other causes                          | 95.0 (94.8-95.1)                     | 85.5 (85.2-85.7) | 76.4 (76.1-76.7) | 53.6 (53.3-54.0) | 95.3 (95.1-95.4)   | 86.0 (85.8-86.2) | 76.8 (76.5-77.1) |
| All                                   | 95.9 (95.8-96.0)                     | 87.6 (87.4-87.7) | 78.5 (78.3-78.7) | 53.9 (53.6-54.2) | 96.2 (96.1-96.3)   | 88.1 (88.0-88.3) | 79.0 (78.8-79.2) |

\* Based on data from Austria, Belgium (Dutch-speaking), Belgium (French-speaking), Bosnia and Herzegovina, Denmark, Estonia, Finland, France, Greece, Iceland, Norway, Spain (Andalusia), Spain (Aragon), Spain (Asturias), Spain (Basque country), Spain (Cantabria), Spain (Castile and León), Spain (Castile-La Mancha), Spain (Catalonia), Spain (Community of Madrid), Spain (Extremadura), Spain (Galicia), Spain (Murcia), Spain (Valencian Region), Sweden, the Netherlands, United Kingdom (England/Northern Ireland/Wales) and United Kingdom (Scotland)

Table B.6.3  
**Incident KRT patients, from day 91, unadjusted**  
*by age, sex, and primary renal disease*

|                                       | Survival probabilities as % (95% CI) |                  |                  |                    |                  |
|---------------------------------------|--------------------------------------|------------------|------------------|--------------------|------------------|
|                                       | cohort 2011 - 2015                   |                  |                  | cohort 2014 - 2018 |                  |
|                                       | 1 year                               | 2 year           | 5 year           | 1 year             | 2 year           |
| 0-19                                  | 98.8 (98.3-99.2)                     | 97.8 (97.1-98.3) | 95.8 (94.9-96.6) | 98.4 (97.8-98.8)   | 97.6 (96.9-98.2) |
| 20-44                                 | 97.4 (97.2-97.6)                     | 95.3 (95.0-95.6) | 89.8 (89.3-90.2) | 97.3 (97.0-97.5)   | 95.0 (94.7-95.3) |
| 45-64                                 | 92.3 (92.1-92.6)                     | 86.1 (85.8-86.4) | 69.8 (69.4-70.2) | 92.9 (92.6-93.1)   | 86.6 (86.3-86.9) |
| 65-74                                 | 85.9 (85.5-86.2)                     | 74.7 (74.3-75.1) | 47.1 (46.6-47.6) | 86.5 (86.2-86.8)   | 75.2 (74.8-75.6) |
| 75+                                   | 77.8 (77.4-78.1)                     | 60.9 (60.4-61.3) | 25.9 (25.5-26.3) | 78.8 (78.5-79.2)   | 61.9 (61.5-62.4) |
| Men                                   | 86.7 (86.5-87.0)                     | 76.2 (76.0-76.5) | 52.1 (51.8-52.5) | 87.1 (86.9-87.3)   | 76.4 (76.2-76.7) |
| Women                                 | 87.2 (86.9-87.5)                     | 77.5 (77.2-77.9) | 55.1 (54.7-55.5) | 88.0 (87.7-88.2)   | 78.3 (78.0-78.6) |
| Diabetes                              | 86.7 (86.4-87.1)                     | 74.9 (74.4-75.3) | 45.4 (44.9-45.9) | 87.2 (86.9-87.5)   | 75.1 (74.6-75.5) |
| Hypertension / renal vascular disease | 85.0 (84.6-85.4)                     | 72.8 (72.3-73.3) | 44.3 (43.7-44.9) | 85.9 (85.5-86.3)   | 73.8 (73.3-74.3) |
| Glomerulonephritis                    | 93.6 (93.2-93.9)                     | 88.0 (87.5-88.4) | 73.8 (73.1-74.4) | 94.0 (93.6-94.3)   | 88.7 (88.3-89.1) |
| Other causes                          | 86.2 (86.0-86.5)                     | 76.5 (76.2-76.9) | 55.8 (55.4-56.1) | 86.6 (86.4-86.9)   | 76.7 (76.4-77.0) |
| All                                   | 86.9 (86.7-87.1)                     | 76.7 (76.5-76.9) | 53.2 (53.0-53.5) | 87.4 (87.3-87.6)   | 77.1 (76.9-77.3) |

*\* Based on data from Austria, Belgium (Dutch-speaking), Belgium (French-speaking), Bosnia and Herzegovina, Denmark, Estonia, Finland, France, Greece, Iceland, Norway, Spain (Andalusia), Spain (Aragon), Spain (Asturias), Spain (Basque country), Spain (Cantabria), Spain (Castile and León), Spain (Castile-La Mancha), Spain (Catalonia), Spain (Community of Madrid), Spain (Extremadura), Spain (Galicia), Spain (Murcia), Spain (Valencian Region), Sweden, the Netherlands, United Kingdom (England/Northern Ireland/Wales) and United Kingdom (Scotland)*



Table B.6.4  
**Incident KRT patients, from day 91, adjusted**  
*adjusted for age, sex, and primary renal disease*

|                                       | Survival probabilities as % (95% CI) |                  |                  |                    |                  |
|---------------------------------------|--------------------------------------|------------------|------------------|--------------------|------------------|
|                                       | cohort 2011 - 2015                   |                  |                  | cohort 2014 - 2018 |                  |
|                                       | 1 year                               | 2 year           | 5 year           | 1 year             | 2 year           |
| 0-19                                  | 98.8 (98.3-99.2)                     | 97.8 (97.1-98.4) | 95.6 (94.7-96.5) | 98.4 (97.9-98.9)   | 97.6 (96.9-98.2) |
| 20-44                                 | 97.3 (97.1-97.6)                     | 95.1 (94.8-95.4) | 89.2 (88.7-89.7) | 97.2 (96.9-97.4)   | 94.9 (94.6-95.2) |
| 45-64                                 | 92.5 (92.3-92.8)                     | 86.4 (86.1-86.7) | 70.0 (69.6-70.5) | 93.1 (92.8-93.3)   | 86.9 (86.6-87.2) |
| 65-74                                 | 86.5 (86.2-86.8)                     | 75.7 (75.3-76.1) | 48.3 (47.8-48.8) | 87.1 (86.8-87.4)   | 76.1 (75.7-76.5) |
| 75+                                   | 78.4 (78.0-78.7)                     | 61.7 (61.3-62.1) | 26.6 (26.2-27.0) | 79.4 (79.1-79.8)   | 62.8 (62.4-63.2) |
| Men                                   | 88.8 (88.6-89.0)                     | 79.2 (78.9-79.4) | 53.1 (52.8-53.5) | 89.1 (88.9-89.3)   | 79.3 (79.0-79.5) |
| Women                                 | 89.4 (89.2-89.7)                     | 80.7 (80.3-81.0) | 56.9 (56.5-57.4) | 89.9 (89.7-90.1)   | 81.1 (80.7-81.4) |
| Diabetes                              | 88.1 (87.8-88.5)                     | 77.0 (76.5-77.4) | 46.1 (45.5-46.6) | 88.7 (88.4-89.0)   | 77.3 (76.9-77.7) |
| Hypertension / renal vascular disease | 90.4 (90.1-90.6)                     | 81.6 (81.3-82.0) | 56.3 (55.8-56.9) | 90.7 (90.4-90.9)   | 81.8 (81.5-82.2) |
| Glomerulonephritis                    | 92.2 (91.8-92.6)                     | 85.2 (84.6-85.7) | 65.9 (65.1-66.7) | 92.8 (92.5-93.2)   | 86.4 (85.8-86.9) |
| Other causes                          | 87.7 (87.5-88.0)                     | 78.3 (78.0-78.6) | 55.0 (54.6-55.4) | 88.1 (87.8-88.3)   | 78.5 (78.2-78.8) |
| All                                   | 89.1 (88.9-89.2)                     | 79.7 (79.5-79.9) | 54.6 (54.3-54.8) | 89.4 (89.3-89.6)   | 80.0 (79.8-80.2) |

\* Based on data from Austria, Belgium (Dutch-speaking), Belgium (French-speaking), Bosnia and Herzegovina, Denmark, Estonia, Finland, France, Greece, Iceland, Norway, Spain (Andalusia), Spain (Aragon), Spain (Asturias), Spain (Basque country), Spain (Cantabria), Spain (Castile and León), Spain (Castile-La Mancha), Spain (Catalonia), Spain (Community of Madrid), Spain (Extremadura), Spain (Galicia), Spain (Murcia), Spain (Valencian Region), Sweden, the Netherlands, United Kingdom (England/Northern Ireland/Wales) and United Kingdom (Scotland)

**Table B.6.5**  
**Incident dialysis patients, from day 1, unadjusted**  
*by age, sex, and primary renal disease*

|                                       | Survival probabilities as % (95% CI) |                  |                  |                  |                    |                  |                  |
|---------------------------------------|--------------------------------------|------------------|------------------|------------------|--------------------|------------------|------------------|
|                                       | cohort 2011 - 2015                   |                  |                  |                  | cohort 2014 - 2018 |                  |                  |
|                                       | 90 day                               | 1 year           | 2 year           | 5 year           | 90 day             | 1 year           | 2 year           |
| 0-19                                  | 99.1 (98.5-99.4)                     | 98.0 (97.2-98.6) | 95.2 (93.7-96.4) | 88.4 (84.7-91.2) | 99.4 (98.9-99.7)   | 97.3 (96.4-98.0) | 95.6 (94.2-96.6) |
| 20-44                                 | 99.0 (98.9-99.2)                     | 96.7 (96.3-96.9) | 93.3 (92.9-93.8) | 80.5 (79.6-81.4) | 99.1 (98.9-99.2)   | 96.4 (96.1-96.7) | 92.8 (92.3-93.2) |
| 45-64                                 | 97.1 (97.0-97.3)                     | 90.5 (90.2-90.7) | 83.0 (82.6-83.4) | 59.1 (58.6-59.7) | 97.4 (97.2-97.5)   | 91.2 (90.9-91.4) | 83.6 (83.2-83.9) |
| 65-74                                 | 94.5 (94.3-94.7)                     | 83.5 (83.1-83.8) | 71.9 (71.4-72.3) | 41.2 (40.7-41.7) | 95.0 (94.8-95.2)   | 84.3 (84.0-84.7) | 72.8 (72.3-73.2) |
| 75+                                   | 90.6 (90.4-90.9)                     | 74.4 (74.0-74.8) | 58.4 (58.0-58.8) | 24.6 (24.3-25.0) | 91.4 (91.2-91.7)   | 75.6 (75.3-76.0) | 59.8 (59.4-60.2) |
| Men                                   | 94.5 (94.3-94.6)                     | 83.7 (83.5-83.9) | 71.9 (71.6-72.2) | 40.6 (40.3-41.0) | 94.9 (94.8-95.1)   | 84.3 (84.0-84.5) | 72.4 (72.1-72.6) |
| Women                                 | 94.4 (94.2-94.6)                     | 83.8 (83.5-84.1) | 72.8 (72.4-73.1) | 43.9 (43.4-44.4) | 94.9 (94.7-95.0)   | 84.8 (84.5-85.1) | 73.8 (73.4-74.2) |
| Diabetes                              | 95.5 (95.3-95.7)                     | 85.5 (85.2-85.9) | 73.0 (72.5-73.4) | 39.4 (38.9-40.0) | 96.1 (95.9-96.2)   | 86.2 (85.9-86.5) | 73.6 (73.2-74.1) |
| Hypertension / renal vascular disease | 94.3 (94.0-94.6)                     | 82.8 (82.4-83.2) | 69.9 (69.4-70.5) | 37.7 (37.1-38.2) | 94.9 (94.6-95.1)   | 83.9 (83.5-84.3) | 71.4 (70.9-71.9) |
| Glomerulonephritis                    | 97.2 (97.0-97.5)                     | 91.4 (91.0-91.8) | 84.6 (84.0-85.1) | 60.0 (59.1-60.9) | 97.6 (97.4-97.8)   | 92.2 (91.8-92.6) | 85.4 (84.9-86.0) |
| Other causes                          | 93.6 (93.4-93.8)                     | 81.9 (81.6-82.2) | 70.7 (70.3-71.0) | 42.3 (41.8-42.7) | 94.0 (93.8-94.2)   | 82.5 (82.2-82.8) | 71.0 (70.6-71.3) |
| All                                   | 94.5 (94.3-94.6)                     | 83.7 (83.5-83.9) | 72.2 (72.0-72.5) | 41.8 (41.5-42.1) | 94.9 (94.8-95.0)   | 84.5 (84.3-84.6) | 72.9 (72.7-73.1) |

*\* Based on data from Austria, Belgium (Dutch-speaking), Belgium (French-speaking), Bosnia and Herzegovina, Denmark, Estonia, Finland, France, Greece, Iceland, Norway, Spain (Andalusia), Spain (Aragon), Spain (Asturias), Spain (Basque country), Spain (Cantabria), Spain (Castile and León), Spain (Castile-La Mancha), Spain (Catalonia), Spain (Community of Madrid), Spain (Extremadura), Spain (Galicia), Spain (Murcia), Spain (Valencian Region), Sweden, the Netherlands, United Kingdom (England/Northern Ireland/Wales) and United Kingdom (Scotland)*

Table B.6.6  
**Incident dialysis patients, from day 1, adjusted**  
*adjusted for age, sex, and primary renal disease*

|                                       | Survival probabilities as % (95% CI) |                  |                  |                  |                    |                  |                  |
|---------------------------------------|--------------------------------------|------------------|------------------|------------------|--------------------|------------------|------------------|
|                                       | cohort 2011 - 2015                   |                  |                  |                  | cohort 2014 - 2018 |                  |                  |
|                                       | 90 day                               | 1 year           | 2 year           | 5 year           | 90 day             | 1 year           | 2 year           |
| 0-19                                  | 99.2 (98.8-99.6)                     | 98.1 (97.4-98.8) | 95.4 (94.0-96.7) | 88.2 (84.9-91.6) | 99.4 (99.1-99.8)   | 97.4 (96.5-98.2) | 95.6 (94.4-96.8) |
| 20-44                                 | 99.1 (99.0-99.3)                     | 96.7 (96.4-97.0) | 93.4 (92.9-93.8) | 80.3 (79.3-81.2) | 99.2 (99.0-99.3)   | 96.5 (96.1-96.8) | 92.9 (92.4-93.3) |
| 45-64                                 | 97.3 (97.1-97.4)                     | 90.8 (90.5-91.0) | 83.5 (83.1-83.8) | 59.8 (59.3-60.4) | 97.6 (97.4-97.7)   | 91.6 (91.3-91.8) | 84.1 (83.7-84.4) |
| 65-74                                 | 94.8 (94.6-95.0)                     | 84.1 (83.8-84.5) | 72.8 (72.3-73.2) | 42.3 (41.8-42.9) | 95.4 (95.2-95.6)   | 85.0 (84.7-85.4) | 73.7 (73.3-74.1) |
| 75+                                   | 90.9 (90.7-91.2)                     | 74.9 (74.6-75.3) | 59.0 (58.6-59.5) | 25.1 (24.7-25.5) | 91.8 (91.6-92.0)   | 76.3 (76.0-76.7) | 60.6 (60.2-61.0) |
| Men                                   | 95.3 (95.2-95.5)                     | 85.8 (85.6-86.0) | 75.1 (74.9-75.4) | 45.3 (45.0-45.7) | 95.8 (95.7-95.9)   | 86.6 (86.4-86.8) | 76.0 (75.8-76.3) |
| Women                                 | 95.3 (95.2-95.5)                     | 86.1 (85.9-86.4) | 76.3 (76.0-76.7) | 49.3 (48.8-49.8) | 95.8 (95.7-96.0)   | 87.2 (86.9-87.5) | 77.5 (77.2-77.9) |
| Diabetes                              | 95.9 (95.7-96.1)                     | 86.6 (86.3-86.9) | 74.7 (74.3-75.1) | 41.7 (41.2-42.2) | 96.5 (96.3-96.6)   | 87.5 (87.2-87.8) | 75.8 (75.4-76.2) |
| Hypertension / renal vascular disease | 96.0 (95.8-96.2)                     | 87.6 (87.2-87.9) | 77.6 (77.2-78.1) | 49.2 (48.6-49.8) | 96.4 (96.3-96.6)   | 88.4 (88.1-88.8) | 78.9 (78.4-79.3) |
| Glomerulonephritis                    | 96.8 (96.5-97.1)                     | 90.1 (89.7-90.6) | 82.7 (82.0-83.3) | 57.3 (56.3-58.3) | 97.3 (97.1-97.6)   | 91.3 (90.8-91.7) | 84.0 (83.4-84.6) |
| Other causes                          | 94.3 (94.1-94.5)                     | 83.6 (83.3-83.9) | 73.3 (72.9-73.6) | 46.0 (45.6-46.5) | 94.8 (94.6-94.9)   | 84.5 (84.2-84.8) | 74.0 (73.7-74.4) |
| All                                   | 95.3 (95.2-95.4)                     | 85.9 (85.8-86.1) | 75.6 (75.4-75.8) | 46.8 (46.5-47.1) | 95.8 (95.7-95.9)   | 86.8 (86.7-87.0) | 76.6 (76.4-76.8) |

\* Based on data from Austria, Belgium (Dutch-speaking), Belgium (French-speaking), Bosnia and Herzegovina, Denmark, Estonia, Finland, France, Greece, Iceland, Norway, Spain (Andalusia), Spain (Aragon), Spain (Asturias), Spain (Basque country), Spain (Cantabria), Spain (Castile and León), Spain (Castile-La Mancha), Spain (Catalonia), Spain (Community of Madrid), Spain (Extremadura), Spain (Galicia), Spain (Murcia), Spain (Valencian Region), Sweden, the Netherlands, United Kingdom (England/Northern Ireland/Wales) and United Kingdom (Scotland)

Table B.6.7  
**Incident dialysis patients, from day 91, unadjusted**  
*by age, sex, and primary renal disease*

|                                       | Survival probabilities as % (95% CI) |                  |                  |                    |                  |
|---------------------------------------|--------------------------------------|------------------|------------------|--------------------|------------------|
|                                       | cohort 2011 - 2015                   |                  |                  | cohort 2014 - 2018 |                  |
|                                       | 1 year                               | 2 year           | 5 year           | 1 year             | 2 year           |
| 0-19                                  | 98.1 (97.2-98.8)                     | 95.9 (94.4-97.1) | 89.2 (85.5-92.0) | 97.5 (96.5-98.2)   | 96.1 (94.7-97.1) |
| 20-44                                 | 96.7 (96.4-97.0)                     | 93.2 (92.8-93.7) | 79.8 (78.8-80.8) | 96.4 (96.1-96.7)   | 92.5 (92.0-93.0) |
| 45-64                                 | 91.4 (91.1-91.6)                     | 83.6 (83.2-84.0) | 58.7 (58.2-59.3) | 91.9 (91.6-92.1)   | 84.0 (83.6-84.4) |
| 65-74                                 | 85.3 (84.9-85.6)                     | 73.2 (72.8-73.7) | 41.5 (41.0-42.0) | 85.9 (85.5-86.2)   | 73.6 (73.2-74.0) |
| 75+                                   | 77.7 (77.3-78.0)                     | 60.6 (60.2-61.1) | 25.3 (24.9-25.7) | 78.7 (78.3-79.0)   | 61.6 (61.2-62.0) |
| Men                                   | 85.6 (85.3-85.8)                     | 73.2 (72.9-73.5) | 40.9 (40.5-41.2) | 85.9 (85.7-86.1)   | 73.2 (72.9-73.5) |
| Women                                 | 85.9 (85.6-86.2)                     | 74.5 (74.1-74.8) | 44.5 (44.0-45.0) | 86.7 (86.5-87.0)   | 75.2 (74.8-75.6) |
| Diabetes                              | 86.2 (85.8-86.6)                     | 73.3 (72.9-73.8) | 38.8 (38.3-39.4) | 86.7 (86.4-87.0)   | 73.5 (73.0-73.9) |
| Hypertension / renal vascular disease | 84.4 (84.0-84.9)                     | 71.3 (70.7-71.8) | 38.0 (37.3-38.6) | 85.3 (84.9-85.7)   | 72.3 (71.8-72.8) |
| Glomerulonephritis                    | 92.4 (92.0-92.8)                     | 84.8 (84.2-85.4) | 59.6 (58.6-60.6) | 92.9 (92.5-93.2)   | 85.5 (85.0-86.1) |
| Other causes                          | 84.6 (84.3-84.9)                     | 72.8 (72.4-73.1) | 43.2 (42.8-43.7) | 85.0 (84.7-85.2)   | 72.7 (72.3-73.0) |
| All                                   | 85.7 (85.5-85.9)                     | 73.6 (73.4-73.9) | 42.2 (41.9-42.5) | 86.2 (86.0-86.4)   | 73.9 (73.7-74.2) |

*\* Based on data from Austria, Belgium (Dutch-speaking), Belgium (French-speaking), Bosnia and Herzegovina, Denmark, Estonia, Finland, France, Greece, Iceland, Norway, Spain (Andalusia), Spain (Aragon), Spain (Asturias), Spain (Basque country), Spain (Cantabria), Spain (Castile and León), Spain (Castile-La Mancha), Spain (Catalonia), Spain (Community of Madrid), Spain (Extremadura), Spain (Galicia), Spain (Murcia), Spain (Valencian Region), Sweden, the Netherlands, United Kingdom (England/Northern Ireland/Wales) and United Kingdom (Scotland)*

Table B.6.8  
**Incident dialysis patients, from day 91, adjusted**  
*adjusted for age, sex, and primary renal disease*

|                                       | Survival probabilities as % (95% CI) |                  |                  |                    |                  |
|---------------------------------------|--------------------------------------|------------------|------------------|--------------------|------------------|
|                                       | cohort 2011 - 2015                   |                  |                  | cohort 2014 - 2018 |                  |
|                                       | 1 year                               | 2 year           | 5 year           | 1 year             | 2 year           |
| 0-19                                  | 98.1 (97.3-98.9)                     | 95.9 (94.6-97.3) | 88.7 (85.4-92.2) | 97.5 (96.6-98.3)   | 95.9 (94.7-97.2) |
| 20-44                                 | 96.7 (96.3-97.0)                     | 93.2 (92.7-93.7) | 79.5 (78.5-80.5) | 96.4 (96.1-96.7)   | 92.5 (92.0-93.1) |
| 45-64                                 | 91.6 (91.4-91.9)                     | 84.0 (83.6-84.4) | 59.5 (59.0-60.1) | 92.1 (91.9-92.4)   | 84.4 (84.1-84.8) |
| 65-74                                 | 85.8 (85.4-86.1)                     | 74.1 (73.6-74.5) | 42.7 (42.1-43.2) | 86.4 (86.1-86.7)   | 74.4 (74.0-74.9) |
| 75+                                   | 78.1 (77.7-78.4)                     | 61.2 (60.7-61.6) | 25.7 (25.3-26.1) | 79.1 (78.8-79.5)   | 62.3 (61.8-62.7) |
| Men                                   | 87.2 (87.0-87.5)                     | 76.1 (75.8-76.4) | 45.3 (44.9-45.7) | 87.8 (87.6-88.0)   | 76.6 (76.3-76.8) |
| Women                                 | 87.8 (87.6-88.1)                     | 77.6 (77.3-78.0) | 49.5 (49.0-50.0) | 88.6 (88.4-88.9)   | 78.5 (78.1-78.8) |
| Diabetes                              | 87.1 (86.8-87.5)                     | 74.9 (74.4-75.3) | 40.9 (40.3-41.4) | 87.8 (87.5-88.1)   | 75.5 (75.1-75.9) |
| Hypertension / renal vascular disease | 88.6 (88.3-89.0)                     | 78.4 (78.0-78.9) | 49.0 (48.4-49.6) | 89.3 (89.0-89.6)   | 79.3 (78.8-79.7) |
| Glomerulonephritis                    | 91.4 (90.9-91.8)                     | 83.1 (82.4-83.7) | 57.0 (56.0-58.0) | 92.0 (91.6-92.5)   | 84.3 (83.6-84.9) |
| Other causes                          | 86.0 (85.7-86.2)                     | 75.0 (74.7-75.4) | 46.7 (46.2-47.1) | 86.6 (86.3-86.8)   | 75.4 (75.1-75.8) |
| All                                   | 87.5 (87.3-87.7)                     | 76.7 (76.5-76.9) | 46.9 (46.6-47.2) | 88.1 (88.0-88.3)   | 77.3 (77.1-77.5) |

\* Based on data from Austria, Belgium (Dutch-speaking), Belgium (French-speaking), Bosnia and Herzegovina, Denmark, Estonia, Finland, France, Greece, Iceland, Norway, Spain (Andalusia), Spain (Aragon), Spain (Asturias), Spain (Basque country), Spain (Cantabria), Spain (Castile and León), Spain (Castile-La Mancha), Spain (Catalonia), Spain (Community of Madrid), Spain (Extremadura), Spain (Galicia), Spain (Murcia), Spain (Valencian Region), Sweden, the Netherlands, United Kingdom (England/Northern Ireland/Wales) and United Kingdom (Scotland)

Table B.6.9  
**First transplant patients (deceased donor), from day of transplant, unadjusted**  
*by age, sex, and primary renal disease*

|                                       | Survival probabilities as % (95% CI) |                  |                  |                    |                  |
|---------------------------------------|--------------------------------------|------------------|------------------|--------------------|------------------|
|                                       | cohort 2011 - 2015                   |                  |                  | cohort 2014 - 2018 |                  |
|                                       | 1 year                               | 2 year           | 5 year           | 1 year             | 2 year           |
| 0-19                                  | 98.7 (97.8-99.2)                     | 98.0 (96.9-98.7) | 96.8 (95.6-97.7) | 99.1 (98.4-99.5)   | 98.7 (97.8-99.2) |
| 20-44                                 | 98.7 (98.5-98.9)                     | 98.1 (97.8-98.4) | 96.2 (95.8-96.6) | 98.8 (98.5-99.0)   | 98.1 (97.8-98.4) |
| 45-64                                 | 96.7 (96.4-96.9)                     | 94.8 (94.5-95.1) | 87.9 (87.4-88.3) | 97.0 (96.8-97.3)   | 95.3 (95.0-95.6) |
| 65+                                   | 92.5 (91.9-93.0)                     | 88.1 (87.5-88.8) | 71.6 (70.7-72.5) | 92.7 (92.2-93.2)   | 88.0 (87.4-88.6) |
| Men                                   | 96.1 (95.8-96.3)                     | 93.7 (93.4-94.0) | 85.2 (84.8-85.7) | 96.3 (96.1-96.5)   | 93.8 (93.5-94.1) |
| Women                                 | 96.4 (96.1-96.7)                     | 94.7 (94.3-95.0) | 87.8 (87.2-88.3) | 96.4 (96.1-96.7)   | 94.7 (94.3-95.1) |
| Diabetes                              | 94.2 (93.6-94.8)                     | 90.8 (90.1-91.5) | 78.2 (77.2-79.2) | 94.4 (93.8-94.9)   | 90.8 (90.1-91.4) |
| Hypertension / renal vascular disease | 94.9 (94.2-95.5)                     | 91.7 (90.9-92.5) | 81.9 (80.7-83.0) | 95.6 (95.0-96.2)   | 92.1 (91.3-92.8) |
| Glomerulonephritis                    | 97.5 (97.1-97.8)                     | 96.1 (95.6-96.5) | 90.4 (89.7-91.0) | 97.5 (97.1-97.8)   | 96.0 (95.5-96.4) |
| Other causes                          | 96.7 (96.4-96.9)                     | 95.0 (94.7-95.3) | 88.2 (87.7-88.6) | 96.8 (96.5-97.0)   | 95.1 (94.8-95.4) |
| All                                   | 96.2 (96.0-96.4)                     | 94.1 (93.8-94.3) | 86.2 (85.8-86.5) | 96.3 (96.2-96.5)   | 94.1 (93.9-94.3) |

*\* Based on data from Austria, Belgium (Dutch-speaking), Belgium (French-speaking), Bosnia and Herzegovina, Denmark, Estonia, Finland, France, Greece, Iceland, Norway, Spain (Andalusia), Spain (Aragon), Spain (Asturias), Spain (Basque country), Spain (Cantabria), Spain (Castile and León), Spain (Castile-La Mancha), Spain (Catalonia), Spain (Community of Madrid), Spain (Extremadura), Spain (Galicia), Spain (Murcia), Spain (Valencian Region), Sweden, the Netherlands, United Kingdom (England/Northern Ireland/Wales) and United Kingdom (Scotland)*

Table B.6.10  
**First transplant patients (deceased donor), from day of transplant, adjusted**  
*adjusted for age, sex, and primary renal disease*

|                                       | Survival probabilities as % (95% CI) |                  |                  |                    |                  |
|---------------------------------------|--------------------------------------|------------------|------------------|--------------------|------------------|
|                                       | cohort 2011 - 2015                   |                  |                  | cohort 2014 - 2018 |                  |
|                                       | 1 year                               | 2 year           | 5 year           | 1 year             | 2 year           |
| 0-19                                  | 98.8 (98.1-99.5)                     | 98.0 (97.2-98.9) | 96.8 (95.7-97.9) | 99.0 (98.4-99.6)   | 98.5 (97.8-99.3) |
| 20-44                                 | 98.8 (98.6-99.0)                     | 98.2 (97.9-98.5) | 96.3 (95.9-96.7) | 98.8 (98.6-99.0)   | 98.2 (97.9-98.5) |
| 45-64                                 | 96.9 (96.7-97.1)                     | 95.1 (94.9-95.4) | 88.6 (88.2-89.1) | 97.3 (97.0-97.5)   | 95.7 (95.4-95.9) |
| 65+                                   | 93.2 (92.7-93.7)                     | 89.2 (88.6-89.8) | 73.6 (72.7-74.6) | 93.4 (93.0-93.9)   | 89.1 (88.5-89.6) |
| Men                                   | 98.0 (97.8-98.1)                     | 96.7 (96.5-96.9) | 91.8 (91.5-92.1) | 98.1 (98.0-98.2)   | 96.7 (96.6-96.9) |
| Women                                 | 98.0 (97.8-98.2)                     | 97.0 (96.7-97.2) | 92.7 (92.3-93.1) | 98.0 (97.8-98.2)   | 97.0 (96.7-97.2) |
| Diabetes                              | 96.9 (96.5-97.2)                     | 94.9 (94.5-95.3) | 87.1 (86.4-87.8) | 97.0 (96.7-97.3)   | 95.0 (94.6-95.4) |
| Hypertension / renal vascular disease | 97.8 (97.5-98.1)                     | 96.4 (96.0-96.8) | 91.6 (91.0-92.2) | 98.1 (97.9-98.4)   | 96.6 (96.2-96.9) |
| Glomerulonephritis                    | 98.4 (98.2-98.7)                     | 97.5 (97.2-97.8) | 93.7 (93.2-94.1) | 98.4 (98.2-98.6)   | 97.4 (97.1-97.7) |
| Other causes                          | 98.0 (97.8-98.1)                     | 96.9 (96.7-97.1) | 92.5 (92.1-92.8) | 98.1 (97.9-98.2)   | 97.0 (96.8-97.2) |
| All                                   | 98.0 (97.9-98.1)                     | 96.8 (96.7-97.0) | 92.1 (91.9-92.4) | 98.1 (97.9-98.2)   | 96.8 (96.7-97.0) |

*\* Based on data from Austria, Belgium (Dutch-speaking), Belgium (French-speaking), Bosnia and Herzegovina, Denmark, Estonia, Finland, France, Greece, Iceland, Norway, Spain (Andalusia), Spain (Aragon), Spain (Asturias), Spain (Basque country), Spain (Cantabria), Spain (Castile and León), Spain (Castile-La Mancha), Spain (Catalonia), Spain (Community of Madrid), Spain (Extremadura), Spain (Galicia), Spain (Murcia), Spain (Valencian Region), Sweden, the Netherlands, United Kingdom (England/Northern Ireland/Wales) and United Kingdom (Scotland)*

Table B.6.11  
**First transplant patients (living donor), from day of transplant, unadjusted**  
*by age, sex, and primary renal disease*

|                                       | Survival probabilities as % (95% CI) |                  |                  |                    |                  |
|---------------------------------------|--------------------------------------|------------------|------------------|--------------------|------------------|
|                                       | cohort 2011 - 2015                   |                  |                  | cohort 2014 - 2018 |                  |
|                                       | 1 year                               | 2 year           | 5 year           | 1 year             | 2 year           |
| 0-19                                  | 99.4 (98.7-99.8)                     | 99.4 (98.7-99.8) | 98.8 (97.8-99.3) | 99.3 (98.5-99.6)   | 98.8 (97.9-99.4) |
| 20-44                                 | 99.7 (99.5-99.8)                     | 99.3 (99.0-99.5) | 97.9 (97.5-98.3) | 99.6 (99.4-99.7)   | 99.3 (99.0-99.5) |
| 45-64                                 | 98.9 (98.5-99.1)                     | 97.8 (97.4-98.2) | 93.6 (92.9-94.2) | 98.8 (98.5-99.0)   | 97.9 (97.4-98.2) |
| 65+                                   | 96.6 (95.5-97.5)                     | 93.7 (92.3-94.9) | 82.6 (80.4-84.5) | 97.0 (96.0-97.7)   | 94.6 (93.4-95.6) |
| Men                                   | 98.9 (98.6-99.1)                     | 98.0 (97.7-98.3) | 94.3 (93.8-94.8) | 98.7 (98.4-98.9)   | 97.9 (97.5-98.2) |
| Women                                 | 99.1 (98.8-99.4)                     | 98.2 (97.7-98.5) | 94.7 (94.0-95.3) | 99.2 (98.9-99.4)   | 98.3 (97.9-98.6) |
| Diabetes                              | 97.4 (96.2-98.3)                     | 95.6 (94.1-96.8) | 85.1 (82.7-87.3) | 97.3 (96.1-98.1)   | 94.9 (93.3-96.1) |
| Hypertension / renal vascular disease | 98.5 (97.5-99.1)                     | 96.5 (95.2-97.5) | 90.5 (88.5-92.1) | 98.0 (97.0-98.7)   | 96.2 (94.9-97.3) |
| Glomerulonephritis                    | 99.2 (98.8-99.5)                     | 98.5 (98.0-98.9) | 96.1 (95.3-96.7) | 99.0 (98.6-99.3)   | 98.6 (98.1-99.0) |
| Other causes                          | 99.2 (98.9-99.4)                     | 98.5 (98.1-98.7) | 95.6 (95.1-96.1) | 99.1 (98.9-99.3)   | 98.5 (98.1-98.7) |
| All                                   | 99.0 (98.8-99.1)                     | 98.1 (97.8-98.3) | 94.4 (94.0-94.8) | 98.9 (98.7-99.0)   | 98.0 (97.8-98.3) |

*\* Based on data from Austria, Belgium (Dutch-speaking), Belgium (French-speaking), Bosnia and Herzegovina, Denmark, Estonia, Finland, France, Greece, Iceland, Norway, Spain (Andalusia), Spain (Aragon), Spain (Asturias), Spain (Basque country), Spain (Cantabria), Spain (Castile and León), Spain (Castile-La Mancha), Spain (Catalonia), Spain (Community of Madrid), Spain (Extremadura), Spain (Galicia), Spain (Murcia), Spain (Valencian Region), Sweden, the Netherlands, United Kingdom (England/Northern Ireland/Wales) and United Kingdom (Scotland)*



Table B.6.12  
**First transplant patients (living donor), from day of transplant, adjusted**  
*adjusted for age, sex, and primary renal disease*

|                                       | Survival probabilities as % (95% CI) |                  |                  |                    |                  |
|---------------------------------------|--------------------------------------|------------------|------------------|--------------------|------------------|
|                                       | cohort 2011 - 2015                   |                  |                  | cohort 2014 - 2018 |                  |
|                                       | 1 year                               | 2 year           | 5 year           | 1 year             | 2 year           |
| 0-19                                  | 99.3 (98.7-99.9)                     | 99.3 (98.7-99.9) | 98.5 (97.6-99.4) | 99.2 (98.6-99.8)   | 98.7 (98.0-99.5) |
| 20-44                                 | 99.7 (99.5-99.8)                     | 99.3 (99.0-99.6) | 97.7 (97.3-98.2) | 99.5 (99.3-99.8)   | 99.3 (99.0-99.5) |
| 45-64                                 | 98.9 (98.6-99.2)                     | 97.9 (97.5-98.3) | 93.8 (93.1-94.5) | 98.8 (98.5-99.1)   | 97.9 (97.5-98.3) |
| 65+                                   | 96.8 (95.8-97.7)                     | 94.0 (92.7-95.3) | 83.6 (81.6-85.7) | 97.2 (96.4-98.0)   | 94.9 (93.9-96.0) |
| Men                                   | 99.1 (98.9-99.3)                     | 98.3 (98.1-98.6) | 95.2 (94.7-95.7) | 98.9 (98.7-99.2)   | 98.3 (98.0-98.6) |
| Women                                 | 99.2 (98.9-99.4)                     | 98.2 (97.8-98.6) | 94.7 (94.0-95.4) | 99.3 (99.1-99.5)   | 98.4 (98.1-98.8) |
| Diabetes                              | 98.3 (97.7-99.0)                     | 97.1 (96.3-98.0) | 89.9 (88.2-91.6) | 98.3 (97.7-99.0)   | 96.8 (95.9-97.7) |
| Hypertension / renal vascular disease | 99.1 (98.6-99.6)                     | 97.9 (97.2-98.6) | 94.0 (92.8-95.3) | 98.9 (98.4-99.4)   | 97.8 (97.1-98.6) |
| Glomerulonephritis                    | 99.2 (98.8-99.5)                     | 98.4 (97.9-98.8) | 95.8 (95.0-96.5) | 99.0 (98.7-99.4)   | 98.6 (98.2-99.0) |
| Other causes                          | 99.2 (99.0-99.4)                     | 98.5 (98.2-98.8) | 95.7 (95.2-96.2) | 99.2 (99.0-99.4)   | 98.6 (98.3-98.9) |
| All                                   | 99.1 (98.9-99.3)                     | 98.3 (98.1-98.5) | 95.0 (94.6-95.4) | 99.1 (98.9-99.2)   | 98.4 (98.1-98.6) |

*\* Based on data from Austria, Belgium (Dutch-speaking), Belgium (French-speaking), Bosnia and Herzegovina, Denmark, Estonia, Finland, France, Greece, Iceland, Norway, Spain (Andalusia), Spain (Aragon), Spain (Asturias), Spain (Basque country), Spain (Cantabria), Spain (Castile and León), Spain (Castile-La Mancha), Spain (Catalonia), Spain (Community of Madrid), Spain (Extremadura), Spain (Galicia), Spain (Murcia), Spain (Valencian Region), Sweden, the Netherlands, United Kingdom (England/Northern Ireland/Wales) and United Kingdom (Scotland)*

Table B.6.13  
**First graft (deceased donor), from day of transplant, unadjusted**  
*by age, sex, and primary renal disease*

|                                       | Survival probabilities as % (95% CI) |                  |                  |                    |                  |
|---------------------------------------|--------------------------------------|------------------|------------------|--------------------|------------------|
|                                       | cohort 2011 - 2015                   |                  |                  | cohort 2014 - 2018 |                  |
|                                       | 1 year                               | 2 year           | 5 year           | 1 year             | 2 year           |
| 0-19                                  | 94.0 (92.4-95.3)                     | 91.3 (89.4-92.8) | 84.8 (82.5-86.9) | 95.2 (93.8-96.3)   | 93.0 (91.3-94.3) |
| 20-44                                 | 94.4 (93.9-94.8)                     | 92.5 (92.0-93.1) | 86.3 (85.6-87.1) | 94.6 (94.1-95.0)   | 92.7 (92.2-93.2) |
| 45-64                                 | 91.8 (91.4-92.2)                     | 88.9 (88.5-89.4) | 79.5 (79.0-80.1) | 92.4 (92.0-92.7)   | 89.6 (89.2-90.0) |
| 65+                                   | 85.8 (85.1-86.5)                     | 80.7 (79.9-81.5) | 62.9 (61.9-63.9) | 86.2 (85.5-86.8)   | 80.7 (80.0-81.5) |
| Men                                   | 90.8 (90.5-91.2)                     | 87.4 (87.0-87.8) | 76.3 (75.8-76.9) | 91.1 (90.8-91.4)   | 87.6 (87.2-88.0) |
| Women                                 | 91.3 (90.9-91.8)                     | 88.6 (88.1-89.2) | 79.0 (78.3-79.6) | 91.7 (91.2-92.1)   | 88.8 (88.2-89.3) |
| Diabetes                              | 89.4 (88.6-90.1)                     | 85.4 (84.5-86.2) | 71.0 (69.9-72.1) | 89.8 (89.0-90.4)   | 85.5 (84.7-86.3) |
| Hypertension / renal vascular disease | 88.5 (87.6-89.4)                     | 84.4 (83.3-85.5) | 71.2 (69.8-72.5) | 89.6 (88.8-90.4)   | 85.0 (84.0-86.0) |
| Glomerulonephritis                    | 91.9 (91.3-92.5)                     | 89.0 (88.3-89.7) | 79.8 (78.9-80.7) | 92.0 (91.4-92.5)   | 89.3 (88.6-89.9) |
| Other causes                          | 91.8 (91.4-92.2)                     | 89.1 (88.6-89.5) | 79.8 (79.2-80.3) | 92.0 (91.6-92.3)   | 89.2 (88.7-89.6) |
| All                                   | 91.0 (90.7-91.3)                     | 87.9 (87.5-88.2) | 77.3 (76.9-77.7) | 91.3 (91.0-91.6)   | 88.0 (87.7-88.4) |

*\* Based on data from Austria, Belgium (Dutch-speaking), Belgium (French-speaking), Bosnia and Herzegovina, Denmark, Estonia, Finland, France, Greece, Iceland, Norway, Spain (Andalusia), Spain (Aragon), Spain (Asturias), Spain (Basque country), Spain (Cantabria), Spain (Castile and León), Spain (Castile-La Mancha), Spain (Catalonia), Spain (Community of Madrid), Spain (Extremadura), Spain (Galicia), Spain (Murcia), Spain (Valencian Region), Sweden, the Netherlands, United Kingdom (England/Northern Ireland/Wales) and United Kingdom (Scotland)*

Table B.6.14  
**First graft (deceased donor), from day of transplant, adjusted**  
*adjusted for age, sex, and primary renal disease*

|                                       | Survival probabilities as % (95% CI) |                  |                  |                    |                  |
|---------------------------------------|--------------------------------------|------------------|------------------|--------------------|------------------|
|                                       | cohort 2011 - 2015                   |                  |                  | cohort 2014 - 2018 |                  |
|                                       | 1 year                               | 2 year           | 5 year           | 1 year             | 2 year           |
| 0-19                                  | 93.6 (92.1-95.2)                     | 90.7 (88.9-92.6) | 83.7 (81.4-86.1) | 94.8 (93.5-96.2)   | 92.4 (90.8-94.0) |
| 20-44                                 | 94.5 (94.0-94.9)                     | 92.6 (92.1-93.2) | 86.5 (85.8-87.2) | 94.6 (94.2-95.1)   | 92.8 (92.2-93.3) |
| 45-64                                 | 92.0 (91.6-92.4)                     | 89.3 (88.8-89.7) | 80.1 (79.5-80.7) | 92.6 (92.2-92.9)   | 89.9 (89.5-90.3) |
| 65+                                   | 86.6 (85.9-87.3)                     | 81.7 (80.9-82.5) | 64.4 (63.4-65.4) | 86.8 (86.2-87.5)   | 81.5 (80.8-82.3) |
| Men                                   | 92.9 (92.6-93.2)                     | 90.1 (89.8-90.5) | 80.9 (80.3-81.4) | 93.0 (92.7-93.3)   | 90.2 (89.9-90.6) |
| Women                                 | 92.9 (92.5-93.3)                     | 90.6 (90.1-91.1) | 82.2 (81.5-82.8) | 93.1 (92.7-93.5)   | 90.6 (90.2-91.1) |
| Diabetes                              | 91.6 (91.0-92.3)                     | 88.4 (87.6-89.1) | 76.1 (75.1-77.1) | 92.0 (91.4-92.6)   | 88.5 (87.9-89.2) |
| Hypertension / renal vascular disease | 92.0 (91.3-92.7)                     | 89.0 (88.2-89.8) | 78.9 (77.8-80.0) | 92.7 (92.1-93.4)   | 89.3 (88.6-90.1) |
| Glomerulonephritis                    | 93.0 (92.5-93.6)                     | 90.5 (89.9-91.1) | 82.3 (81.5-83.1) | 93.1 (92.6-93.6)   | 90.7 (90.1-91.2) |
| Other causes                          | 93.1 (92.7-93.4)                     | 90.7 (90.3-91.1) | 82.4 (81.9-83.0) | 93.2 (92.9-93.5)   | 90.8 (90.4-91.2) |
| All                                   | 92.9 (92.6-93.1)                     | 90.3 (90.0-90.6) | 81.3 (80.9-81.8) | 93.1 (92.8-93.3)   | 90.4 (90.1-90.7) |

*\* Based on data from Austria, Belgium (Dutch-speaking), Belgium (French-speaking), Bosnia and Herzegovina, Denmark, Estonia, Finland, France, Greece, Iceland, Norway, Spain (Andalusia), Spain (Aragon), Spain (Asturias), Spain (Basque country), Spain (Cantabria), Spain (Castile and León), Spain (Castile-La Mancha), Spain (Catalonia), Spain (Community of Madrid), Spain (Extremadura), Spain (Galicia), Spain (Murcia), Spain (Valencian Region), Sweden, the Netherlands, United Kingdom (England/Northern Ireland/Wales) and United Kingdom (Scotland)*

Table B.6.15  
**First graft (living donor), from day of transplant, unadjusted**  
*by age, sex, and primary renal disease*

|                                       | Survival probabilities as % (95% CI) |                  |                  |                    |                  |
|---------------------------------------|--------------------------------------|------------------|------------------|--------------------|------------------|
|                                       | cohort 2011 - 2015                   |                  |                  | cohort 2014 - 2018 |                  |
|                                       | 1 year                               | 2 year           | 5 year           | 1 year             | 2 year           |
| 0-19                                  | 96.1 (94.6-97.2)                     | 94.4 (92.6-95.7) | 89.2 (87.0-91.1) | 96.1 (94.7-97.2)   | 94.2 (92.5-95.5) |
| 20-44                                 | 97.1 (96.6-97.6)                     | 95.9 (95.2-96.4) | 89.9 (89.0-90.7) | 97.0 (96.5-97.5)   | 96.0 (95.4-96.5) |
| 45-64                                 | 96.7 (96.2-97.2)                     | 94.9 (94.3-95.5) | 88.5 (87.6-89.3) | 96.8 (96.3-97.2)   | 95.3 (94.7-95.9) |
| 65+                                   | 95.2 (93.9-96.2)                     | 92.0 (90.4-93.4) | 79.9 (77.6-82.0) | 95.7 (94.6-96.6)   | 92.8 (91.5-94.0) |
| Men                                   | 96.6 (96.2-97.0)                     | 95.1 (94.6-95.5) | 88.5 (87.7-89.2) | 96.5 (96.1-96.9)   | 95.2 (94.7-95.6) |
| Women                                 | 96.7 (96.2-97.2)                     | 94.7 (94.0-95.3) | 87.6 (86.6-88.5) | 96.9 (96.4-97.4)   | 95.1 (94.4-95.7) |
| Diabetes                              | 94.8 (93.1-96.0)                     | 92.1 (90.1-93.6) | 80.0 (77.3-82.4) | 94.9 (93.4-96.1)   | 91.5 (89.6-93.1) |
| Hypertension / renal vascular disease | 96.2 (94.8-97.2)                     | 93.1 (91.3-94.5) | 84.6 (82.2-86.7) | 96.0 (94.5-97.0)   | 93.1 (91.3-94.5) |
| Glomerulonephritis                    | 96.7 (96.0-97.2)                     | 95.0 (94.2-95.7) | 87.6 (86.4-88.8) | 96.6 (95.9-97.2)   | 95.6 (94.8-96.2) |
| Other causes                          | 96.9 (96.4-97.3)                     | 95.4 (94.9-95.9) | 89.8 (89.0-90.5) | 96.9 (96.5-97.3)   | 95.6 (95.1-96.1) |
| All                                   | 96.6 (96.3-97.0)                     | 94.9 (94.5-95.3) | 88.1 (87.5-88.7) | 96.7 (96.3-97.0)   | 95.2 (94.8-95.5) |

*\* Based on data from Austria, Belgium (Dutch-speaking), Belgium (French-speaking), Bosnia and Herzegovina, Denmark, Estonia, Finland, France, Greece, Iceland, Norway, Spain (Andalusia), Spain (Aragon), Spain (Asturias), Spain (Basque country), Spain (Cantabria), Spain (Castile and León), Spain (Castile-La Mancha), Spain (Catalonia), Spain (Community of Madrid), Spain (Extremadura), Spain (Galicia), Spain (Murcia), Spain (Valencian Region), Sweden, the Netherlands, United Kingdom (England/Northern Ireland/Wales) and United Kingdom (Scotland)*

Table B.6.16  
**First graft (living donor), from day of transplant, adjusted**  
*adjusted for age, sex, and primary renal disease*

|                                       | Survival probabilities as % (95% CI) |                  |                  |                    |                  |
|---------------------------------------|--------------------------------------|------------------|------------------|--------------------|------------------|
|                                       | cohort 2011 - 2015                   |                  |                  | cohort 2014 - 2018 |                  |
|                                       | 1 year                               | 2 year           | 5 year           | 1 year             | 2 year           |
| 0-19                                  | 95.4 (93.9-96.9)                     | 93.5 (91.7-95.3) | 87.7 (85.4-90.1) | 95.6 (94.1-97.0)   | 93.3 (91.6-95.1) |
| 20-44                                 | 97.0 (96.5-97.5)                     | 95.6 (95.0-96.3) | 89.3 (88.3-90.2) | 96.8 (96.3-97.3)   | 95.8 (95.2-96.4) |
| 45-64                                 | 96.7 (96.2-97.2)                     | 94.9 (94.3-95.5) | 88.4 (87.5-89.3) | 96.7 (96.3-97.2)   | 95.3 (94.7-95.8) |
| 65+                                   | 95.0 (93.8-96.3)                     | 91.8 (90.3-93.4) | 79.9 (77.7-82.2) | 95.7 (94.8-96.7)   | 92.9 (91.6-94.2) |
| Men                                   | 96.4 (96.0-96.9)                     | 94.8 (94.3-95.4) | 87.9 (87.1-88.7) | 96.4 (95.9-96.8)   | 95.0 (94.5-95.5) |
| Women                                 | 96.3 (95.8-96.9)                     | 94.0 (93.3-94.8) | 86.1 (85.0-87.2) | 96.7 (96.1-97.2)   | 94.6 (93.9-95.3) |
| Diabetes                              | 95.1 (93.7-96.4)                     | 92.5 (90.9-94.2) | 80.9 (78.5-83.5) | 95.2 (93.9-96.5)   | 91.9 (90.2-93.6) |
| Hypertension / renal vascular disease | 96.4 (95.3-97.6)                     | 93.5 (92.0-95.0) | 85.4 (83.3-87.6) | 96.1 (95.0-97.3)   | 93.4 (91.9-94.9) |
| Glomerulonephritis                    | 96.4 (95.7-97.1)                     | 94.6 (93.7-95.4) | 86.6 (85.3-87.9) | 96.4 (95.8-97.1)   | 95.3 (94.6-96.1) |
| Other causes                          | 96.7 (96.2-97.1)                     | 95.1 (94.6-95.7) | 89.2 (88.4-89.9) | 96.8 (96.4-97.2)   | 95.5 (95.0-96.0) |
| All                                   | 96.4 (96.0-96.7)                     | 94.5 (94.1-95.0) | 87.3 (86.6-87.9) | 96.5 (96.1-96.8)   | 94.9 (94.5-95.3) |

*\* Based on data from Austria, Belgium (Dutch-speaking), Belgium (French-speaking), Bosnia and Herzegovina, Denmark, Estonia, Finland, France, Greece, Iceland, Norway, Spain (Andalusia), Spain (Aragon), Spain (Asturias), Spain (Basque country), Spain (Cantabria), Spain (Castile and León), Spain (Castile-La Mancha), Spain (Catalonia), Spain (Community of Madrid), Spain (Extremadura), Spain (Galicia), Spain (Murcia), Spain (Valencian Region), Sweden, the Netherlands, United Kingdom (England/Northern Ireland/Wales) and United Kingdom (Scotland)*

Figure B.6.1  
**Patient survival by primary renal disease:**  
**Incident KRT patients**  
*from day 1, adjusted for age and sex*

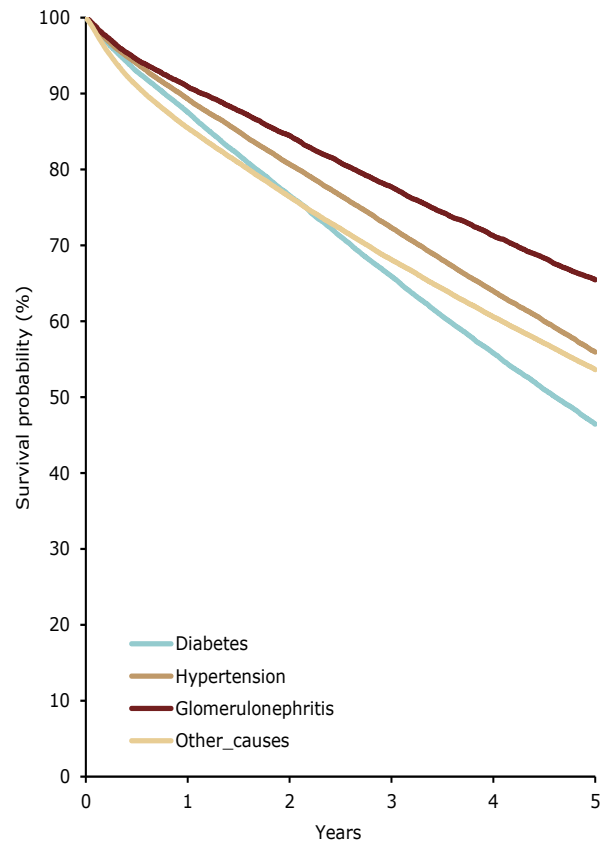

Figure B.6.2  
**Patient survival by modality:**  
**Incident dialysis patients**  
*from day 91, adjusted for age, sex, and primary renal disease*

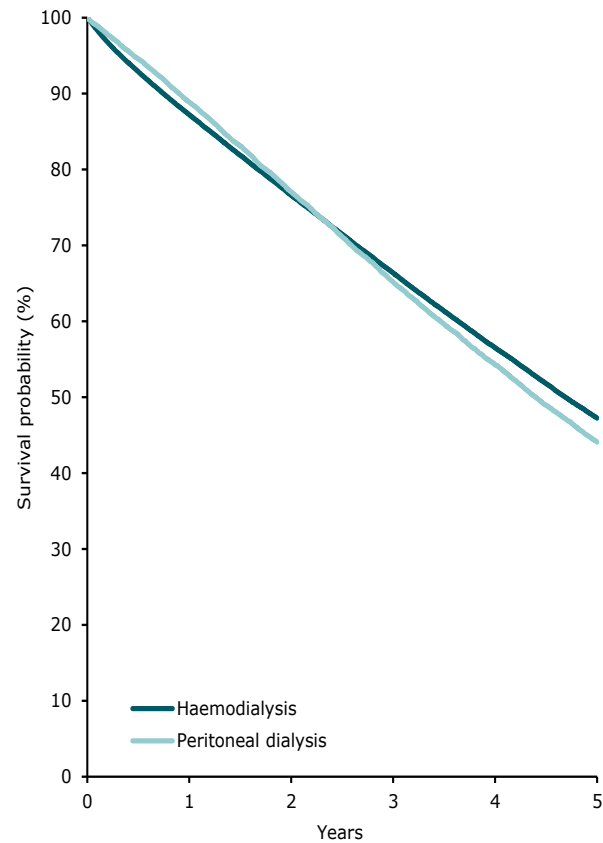

Figure B.6.3  
**Patient survival by donor type:**  
**Patients receiving a first kidney transplant**  
*from day of transplant, adjusted for age, sex, and primary renal disease*

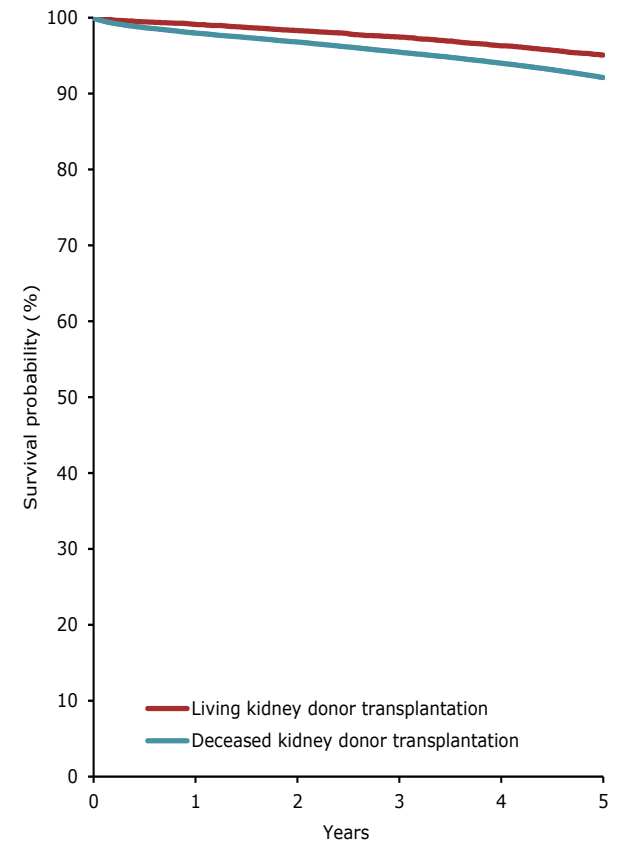

*Survival on dialysis was examined using the Cox regression method, with transplantation as a censored observation (see methods)*

Table B.7.1

**Expected remaining lifetimes (years) of the general population (cohort 2016-2020) and of prevalent dialysis and kidney transplant patients (cohort 2016-2020)**

by age and sex

| General population |      |      |       | ESRD: Dialysis |      |      |       | ESRD: Transplant |      |      |       |
|--------------------|------|------|-------|----------------|------|------|-------|------------------|------|------|-------|
| Age                | All  | Men  | Women | Age            | All  | Men  | Women | Age              | All  | Men  | Women |
| 0                  | 81.1 | 78.7 | 83.5  | 0-19           | 38.7 | 39.8 | 37.1  | 0-19             | 62.4 | 62.1 | 63.1  |
| 5                  | 76.5 | 74.1 | 78.8  |                |      |      |       |                  |      |      |       |
| 10                 | 71.5 | 69.1 | 73.9  |                |      |      |       |                  |      |      |       |
| 15                 | 66.5 | 64.1 | 68.9  |                |      |      |       |                  |      |      |       |
| 20                 | 61.6 | 59.2 | 64.0  | 20-24          | 21.2 | 22.1 | 19.9  | 20-24            | 43.2 | 42.7 | 44.2  |
| 25                 | 56.7 | 54.4 | 59.0  | 25-29          | 18.5 | 19.1 | 17.6  | 25-29            | 38.9 | 38.4 | 39.7  |
| 30                 | 51.9 | 49.5 | 54.1  | 30-34          | 16.0 | 16.3 | 15.6  | 30-34            | 34.6 | 34.1 | 35.7  |
| 35                 | 47.0 | 44.7 | 49.2  | 35-39          | 13.8 | 13.9 | 13.9  | 35-39            | 30.4 | 29.8 | 31.4  |
| 40                 | 42.2 | 40.0 | 44.3  | 40-44          | 11.9 | 11.7 | 12.2  | 40-44            | 26.3 | 25.7 | 27.2  |
| 45                 | 37.4 | 35.3 | 39.5  | 45-49          | 10.1 | 9.9  | 10.5  | 45-49            | 22.4 | 21.9 | 23.3  |
| 50                 | 32.8 | 30.7 | 34.8  | 50-54          | 8.6  | 8.4  | 9.0   | 50-54            | 18.8 | 18.4 | 19.7  |
| 55                 | 28.3 | 26.3 | 30.2  | 55-59          | 7.3  | 7.1  | 7.7   | 55-59            | 15.5 | 15.1 | 16.3  |
| 60                 | 23.9 | 22.1 | 25.7  | 60-64          | 6.2  | 6.0  | 6.6   | 60-64            | 12.5 | 12.2 | 13.2  |
| 65                 | 19.8 | 18.1 | 21.4  | 65-69          | 5.4  | 5.2  | 5.7   | 65-69            | 9.9  | 9.6  | 10.4  |
| 70                 | 15.9 | 14.4 | 17.2  | 70-74          | 4.7  | 4.6  | 5.1   | 70-74            | 7.6  | 7.5  | 7.9   |
| 75                 | 12.3 | 11.1 | 13.3  | 75-79          | 4.0  | 3.9  | 4.2   | 75-79            | 5.6  | 5.5  | 5.7   |
| 80                 | 9.0  | 8.0  | 9.7   | 80-84          | 3.4  | 3.3  | 3.4   | 80-84            | 3.8  | 3.7  | 3.9   |
| 85                 | 6.2  | 5.6  | 6.6   | 85-89          | 2.2  | 2.1  | 2.2   |                  |      |      |       |

Based on data from Austria, Belgium (Dutch-speaking), Belgium (French-speaking), Bosnia and Herzegovina, Denmark, Estonia, Finland, France, Greece, Iceland, Norway, Spain (Andalusia), Spain (Aragon), Spain (Asturias), Spain (Basque country), Spain (Cantabria), Spain (Castile and León), Spain (Castile-La Mancha), Spain (Catalonia), Spain (Community of Madrid), Spain (Extremadura), Spain (Galicia), Spain (Murcia), Spain (Valencian Region), Sweden, the Netherlands, United Kingdom (England/Northern Ireland/Wales) and United Kingdom (Scotland)

**Section C: Aggregated data reference tables**



Table C.1.1  
General population data and number of renal centres

|                           | General population of country/region in thousands | % Coverage of general population by the registry | Total number of renal centres of country/region | Number of renal centres collaborating with the registry |
|---------------------------|---------------------------------------------------|--------------------------------------------------|-------------------------------------------------|---------------------------------------------------------|
| Albania                   | 2846                                              | 99.0                                             | 14                                              | 13                                                      |
| Belarus ‡                 | 9380                                              | 100                                              | 54                                              | 52                                                      |
| Croatia                   | 4048                                              | 85.0                                             | 47                                              | 43                                                      |
| Cyprus                    | 888                                               | 100                                              | 8                                               | 8                                                       |
| Czech Republic            | 10702                                             | 98.0                                             | 115                                             | 112                                                     |
| Hungary                   | 9770                                              | 99.0                                             | 62                                              | 60                                                      |
| Israel                    | 9215                                              | 100                                              | 79                                              | 79                                                      |
| Italy (8 of 20 regions) § | 59641                                             | 36.0                                             | 604                                             | 110                                                     |
| Kosovo                    | 1740                                              | 97.0                                             | 9                                               | 8                                                       |
| Lithuania                 | 2794                                              | 100                                              | 67                                              | 67                                                      |
| North Macedonia           | 2069                                              | 100                                              | 23                                              | 23                                                      |
| Poland                    | 38354                                             | 100                                              | 281                                             | 281                                                     |
| Portugal                  | 10298                                             | 100                                              | 133                                             | 133                                                     |
| Russia                    | 146171                                            | 98.0                                             | 740                                             | 687                                                     |
| Slovakia                  | 5460                                              | 79.2                                             | 77                                              | 61                                                      |
| Spain #                   | 47451                                             | 100                                              | 355                                             | 351                                                     |
| Turkey                    | 83614                                             | 100                                              | 1111                                            | 1111                                                    |

‡ Data from one pediatric center and one center with acute kidney injury patients are excluded

§ The data in this report covers 8 of 20 regions (Calabria, Emilia-Romagna, Liguria, Marche, Piedmont, Puglia, Trentino-Alto Adige, and Veneto). The coverage within Puglia is 64%.

# No data from 4 centers of the Canary Islands (these centers treat foreign patients only)

Table C.2.1  
**Incident counts and percentages by age and sex**  
*at day 1*

|                         | All      |          |          | 0-19 |   |     |   |       |   | 20-44 |    |      |    |       |    | 45-64 |    |      |    |       |    | 65-74 |    |      |    |       |    | 75+  |    |      |    |     |    |
|-------------------------|----------|----------|----------|------|---|-----|---|-------|---|-------|----|------|----|-------|----|-------|----|------|----|-------|----|-------|----|------|----|-------|----|------|----|------|----|-----|----|
|                         | All      | Men      | Women    | All  |   | Men |   | Women |   | All   |    | Men  |    | Women |    | All   |    | Men  |    | Women |    | All   |    | Men  |    | Women |    |      |    |      |    |     |    |
|                         | N (100%) | N (100%) | N (100%) | N    | % | N   | % | N     | % | N     | %  | N    | %  | N     | %  | N     | %  | N    | %  | N     | %  | N     | %  | N    | %  | N     | %  |      |    |      |    |     |    |
| Albania                 | 368      | 240      | 128      | 1    | 0 | 1   | 0 | 0     | 0 | 48    | 13 | 32   | 13 | 16    | 13 | 135   | 37 | 89   | 37 | 46    | 36 | 111   | 30 | 69   | 29 | 42    | 33 | 73   | 20 | 49   | 20 | 24  | 19 |
| Belarus *               | 696      | 392      | 304      | 2    | 0 | 2   | 1 | 0     | 0 | 132   | 19 | 86   | 22 | 46    | 15 | 309   | 44 | 176  | 45 | 133   | 44 | 195   | 28 | 94   | 24 | 101   | 33 | 58   | 8  | 34   | 9  | 24  | 8  |
| Croatia †               | 376      | 237      | 139      | 0    | 0 | 0   | 0 | 0     | 0 | 18    | 5  | 11   | 5  | 7     | 5  | 98    | 26 | 62   | 26 | 36    | 26 | 110   | 29 | 72   | 30 | 38    | 27 | 150  | 40 | 92   | 39 | 58  | 42 |
| Cyprus                  | 242      | 161      | 81       | 0    | 0 | 0   | 0 | 0     | 0 | 12    | 5  | 8    | 5  | 4     | 5  | 56    | 23 | 36   | 22 | 20    | 25 | 77    | 32 | 56   | 35 | 21    | 26 | 97   | 40 | 61   | 38 | 36  | 44 |
| Czech Republic †        | 2230     |          |          |      |   |     |   |       |   |       |    |      |    |       |    |       |    |      |    |       |    |       |    |      |    |       |    |      |    |      |    |     |    |
| Hungary                 | 1923     | 1115     | 808      | 8    | 0 |     |   |       |   | 181   | 9  |      |    |       |    | 553   | 29 |      |    |       |    | 642   | 33 |      |    |       |    | 539  | 28 |      |    |     |    |
| Israel                  | 1797     | 1182     | 615      | 25   | 1 | 14  | 1 | 11    | 2 | 137   | 8  | 88   | 7  | 49    | 8  | 501   | 28 | 328  | 28 | 173   | 28 | 552   | 31 | 373  | 32 | 179   | 29 | 582  | 32 | 379  | 32 | 203 | 33 |
| Italy (8 of 20 regions) | 3405     | 2231     | 1174     | 20   | 1 | 12  | 1 | 8     | 1 | 233   | 7  | 155  | 7  | 78    | 7  | 897   | 26 | 572  | 26 | 325   | 28 | 929   | 27 | 631  | 28 | 298   | 25 | 1326 | 39 | 861  | 39 | 465 | 40 |
| Kosovo                  | 214      | 129      | 85       | 3    | 1 | 0   | 0 | 3     | 4 | 30    | 14 | 16   | 12 | 14    | 16 | 78    | 36 | 46   | 36 | 32    | 38 | 60    | 28 | 36   | 28 | 24    | 28 | 43   | 20 | 31   | 24 | 12  | 14 |
| Lithuania               | 242      | 142      | 100      | 4    | 2 | 2   | 1 | 2     | 2 | 35    | 14 | 21   | 15 | 14    | 14 | 91    | 38 | 51   | 36 | 40    | 40 | 52    | 21 | 39   | 27 | 13    | 13 | 60   | 25 | 29   | 20 | 31  | 31 |
| North Macedonia         | 381      | 235      | 146      | 5    | 1 | 3   | 1 | 2     | 1 | 30    | 8  | 19   | 8  | 11    | 8  | 140   | 37 | 80   | 34 | 60    | 41 | 117   | 31 | 74   | 31 | 43    | 29 | 89   | 23 | 59   | 25 | 30  | 21 |
| Poland                  | 4781     |          |          |      |   |     |   |       |   |       |    |      |    |       |    |       |    |      |    |       |    |       |    |      |    |       |    |      |    |      |    |     |    |
| Portugal                | 2361     |          |          |      |   |     |   |       |   |       |    |      |    |       |    |       |    |      |    |       |    |       |    |      |    |       |    |      |    |      |    |     |    |
| Russia †                | 12103    | 6597     | 5506     | 501  | 4 | 359 | 5 | 142   | 3 | 2574  | 21 | 1564 | 24 | 1010  | 18 | 4963  | 41 | 2698 | 41 | 2265  | 41 | 3131  | 26 | 1567 | 24 | 1564  | 28 | 934  | 8  | 409  | 6  | 525 | 10 |
| Slovakia †              | 540      | 329      | 211      | 0    | 0 | 0   | 0 | 0     | 0 | 42    | 8  | 30   | 9  | 12    | 6  | 187   | 35 | 129  | 39 | 58    | 27 | 200   | 37 | 110  | 33 | 90    | 43 | 111  | 21 | 60   | 18 | 51  | 24 |
| Spain §                 | 6643     | 4500     | 2143     | 34   | 1 | 21  | 0 | 13    | 1 | 617   | 9  | 397  | 9  | 220   | 10 | 2046  | 31 | 1391 | 31 | 655   | 31 | 1894  | 29 | 1317 | 29 | 577   | 27 | 2052 | 31 | 1374 | 31 | 678 | 32 |
| Turkey                  | 11596    |          |          |      |   |     |   |       |   |       |    |      |    |       |    |       |    |      |    |       |    |       |    |      |    |       |    |      |    |      |    |     |    |

Categories may not add up because of missing values or rounding off

When cells are left empty, the data are unavailable

\* Patients younger than 18 years of age are not reported

† Data include dialysis patients only

§ Data presented in column 0-19 refer to patients aged 0-14 years and data presented in column 20-44 refer to patients aged 15-44 years

Table C.2.2  
**Incidence per million (age-related) population by age and sex, unadjusted**  
*at day 1*

|                         | All   |       |       | 0-19 |      |       | 20-44 |      |       | 45-64 |       |       | 65-74 |        |       | 75+    |        |        |
|-------------------------|-------|-------|-------|------|------|-------|-------|------|-------|-------|-------|-------|-------|--------|-------|--------|--------|--------|
|                         | All   | Men   | Women | All  | Men  | Women | All   | Men  | Women | All   | Men   | Women | All   | Men    | Women | All    | Men    | Women  |
|                         | Pmp   | Pmp   | Pmp   | Pmp  | Pmp  | Pmp   | Pmp   | Pmp  | Pmp   | Pmp   | Pmp   | Pmp   | Pmp   | Pmp    | Pmp   | Pmp    | Pmp    | Pmp    |
| Albania                 | 130.6 | 170.6 | 90.7  | 1.5  | 2.9  | 0     | 48.5  | 63.8 | 32.8  | 181.8 | 246.0 | 120.8 | 444.8 | 569.5  | 327.1 | 439.0  | 616.0  | 276.7  |
| Belarus *               | 74.2  | 90.4  | 60.3  | 1.0  | 1.9  | 0     | 40.9  | 53.7 | 28.2  | 117.4 | 147.0 | 92.7  | 218.1 | 276.8  | 182.1 | 101.4  | 233.4  | 56.3   |
| Croatia †               | 109.3 | 141.7 | 78.6  | 0    | 0    | 0     | 16.5  | 19.5 | 13.2  | 102.4 | 131.9 | 73.9  | 269.3 | 390.9  | 169.4 | 461.9  | 787.8  | 278.9  |
| Cyprus                  | 272.5 | 370.5 | 178.6 | 0    | 0    | 0     | 35.2  | 48.1 | 22.9  | 266.2 | 346.5 | 187.8 | 921.1 | 1400.0 | 481.7 | 1585.0 | 2276.1 | 1046.5 |
| Czech Republic †        | 212.6 |       |       |      |      |       |       |      |       |       |       |       |       |        |       |        |        |        |
| Hungary                 | 198.8 | 240.6 | 160.4 | 4.2  |      |       | 55.7  |      |       | 211.9 |       |       | 575.8 |        |       | 667.2  |        |        |
| Israel                  | 195.0 | 258.3 | 132.6 | 7.5  | 8.2  | 6.8   | 45.0  | 57.5 | 32.3  | 287.0 | 385.5 | 193.4 | 830.3 | 1207.5 | 503.0 | 1304.9 | 2034.4 | 781.7  |
| Italy (8 of 20 regions) | 158.6 | 213.3 | 106.6 | 5.2  | 6.1  | 4.3   | 37.8  | 49.5 | 25.7  | 138.0 | 179.6 | 98.0  | 379.8 | 546.4  | 230.8 | 521.4  | 843.2  | 305.6  |
| Kosovo                  | 126.8 | 151.8 | 101.4 | 4.7  | 0    | 9.7   | 46.4  | 49.5 | 43.3  | 273.3 | 327.0 | 221.2 | 794.4 | 985.5  | 615.4 | 1138.9 | 1887.5 | 562.6  |
| Lithuania               | 86.6  | 108.9 | 67.1  | 7.2  | 7.0  | 7.4   | 40.1  | 46.2 | 33.4  | 112.2 | 134.9 | 92.3  | 185.0 | 361.2  | 75.1  | 218.2  | 362.1  | 159.1  |
| North Macedonia         | 184.2 | 227.0 | 141.3 | 11.1 | 12.9 | 9.2   | 39.6  | 48.9 | 29.8  | 251.4 | 287.6 | 215.3 | 592.5 | 808.0  | 406.1 | 825.8  | 1316.3 | 476.6  |
| Poland                  | 124.7 |       |       |      |      |       |       |      |       |       |       |       |       |        |       |        |        |        |
| Portugal                | 229.3 |       |       |      |      |       |       |      |       |       |       |       |       |        |       |        |        |        |
| Russia †                | 84.5  | 99.2  | 71.7  | 15.4 | 21.5 | 9.0   | 51.7  | 62.8 | 40.6  | 129.8 | 155.8 | 108.2 | 217.4 | 293.3  | 172.6 | 112.7  | 183.0  | 86.7   |
| Slovakia †              | 124.9 | 155.8 | 95.4  | 0    | 0    | 0     | 27.5  | 38.3 | 16.1  | 160.7 | 224.4 | 98.4  | 433.4 | 545.2  | 346.6 | 401.1  | 642.4  | 278.2  |
| Spain §                 | 140.0 | 193.5 | 88.6  | 3.7  | 4.4  | 2.9   | 40.7  | 51.8 | 29.3  | 147.8 | 202.8 | 93.8  | 408.5 | 605.7  | 234.3 | 447.8  | 757.7  | 244.9  |
| Turkey                  | 138.7 |       |       |      |      |       |       |      |       |       |       |       |       |        |       |        |        |        |

*When cells are left empty, the data are unavailable*

*\* Patients younger than 18 years of age are not reported*

*† Data include dialysis patients only*

*§ Data presented in column 0-19 refer to patients aged 0-14 years and data presented in column 20-44 refer to patients aged 15-44 years*

Table C.2.3  
**Sex, mean age, and median age of incident patients**  
*at day 1*

|                         | All |              |      |                |      |      | Men  |              |      |                |      |      | Women |              |      |                |      |      |
|-------------------------|-----|--------------|------|----------------|------|------|------|--------------|------|----------------|------|------|-------|--------------|------|----------------|------|------|
|                         | %   | Mean (years) | SD   | Median (years) | P25  | P75  | %    | Mean (years) | SD   | Median (years) | P25  | P75  | %     | Mean (years) | SD   | Median (years) | P25  | P75  |
| Albania                 | 100 | 62.5         | 15.1 | 65.0           | 55.0 | 73.0 | 65.2 | 62.6         | 15.2 | 64.0           | 55.5 | 73.8 | 34.8  | 62.3         | 15.1 | 66.0           | 55.0 | 73.0 |
| Belarus *               | 100 |              |      |                |      |      | 56.3 |              |      |                |      |      | 43.7  |              |      |                |      |      |
| Croatia †               | 100 | 69.1         | 14.1 | 71.0           | 61.0 | 79.0 | 63.0 | 69.6         | 13.7 | 72.0           | 61.0 | 78.0 | 37.0  | 68.3         | 14.6 | 70.0           | 62.0 | 79.0 |
| Cyprus                  | 100 | 70.0         | 12.8 | 72.0           | 63.0 | 79.0 | 66.5 | 70.0         | 12.0 | 72.0           | 63.0 | 77.0 | 33.5  | 70.0         | 14.1 | 73.0           | 63.0 | 81.0 |
| Czech Republic          |     |              |      |                |      |      |      |              |      |                |      |      |       |              |      |                |      |      |
| Hungary                 | 100 | 63.7         |      |                |      |      | 58.0 |              |      |                |      |      | 42.0  |              |      |                |      |      |
| Israel                  | 100 | 67.0         | 15.4 | 69.2           | 60.3 | 78.2 | 65.8 | 67.0         | 15.3 | 69.1           | 60.3 | 78.0 | 34.2  | 67.0         | 15.8 | 69.6           | 60.4 | 78.7 |
| Italy (8 of 20 regions) | 100 | 68.6         | 14.8 | 71.5           | 59.7 | 79.4 | 65.5 | 68.6         | 14.7 | 71.5           | 60.0 | 79.3 | 34.5  | 68.6         | 15.0 | 71.6           | 59.3 | 79.5 |
| Kosovo                  | 100 | 61.1         | 14.5 | 64.0           | 53.0 | 71.0 | 60.3 | 63.0         | 12.9 | 65.0           | 54.0 | 74.0 | 39.7  | 58.2         | 16.3 | 62.0           | 49.5 | 71.0 |
| Lithuania               | 100 | 60.8         | 17.1 | 62.6           | 49.5 | 74.0 | 58.7 | 60.5         | 16.4 | 63.0           | 49.9 | 72.3 | 41.3  | 61.1         | 18.2 | 61.1           | 48.1 | 76.6 |
| North Macedonia         | 100 | 63.9         | 14.2 | 66.0           | 56.0 | 74.0 | 61.7 | 64.4         | 14.2 | 66.0           | 57.0 | 74.5 | 38.3  | 63.0         | 14.1 | 64.5           | 55.0 | 73.0 |
| Poland                  |     |              |      |                |      |      |      |              |      |                |      |      |       |              |      |                |      |      |
| Portugal                |     |              |      |                |      |      |      |              |      |                |      |      |       |              |      |                |      |      |
| Russia †                | 100 |              |      |                |      |      | 54.5 |              |      |                |      |      | 45.5  |              |      |                |      |      |
| Slovakia †              | 100 | 64.4         | 13.1 | 66.0           | 57.0 | 73.0 | 60.9 | 62.8         | 13.5 | 65.0           | 54.0 | 72.0 | 39.1  | 66.9         | 11.7 | 69.0           | 62.0 | 74.0 |
| Spain                   | 100 | 63.8         | 14.8 | 68.3           | 54.9 | 77.1 | 67.7 | 64.0         | 14.6 | 68.3           | 55.2 | 76.9 | 32.3  | 63.5         | 15.3 | 68.2           | 54.2 | 77.5 |
| Turkey                  |     |              |      |                |      |      |      |              |      |                |      |      |       |              |      |                |      |      |

*Categories may not add up because of missing values or rounding off*

*When cells are left empty, the data are unavailable*

*\* Patients younger than 18 years of age are not reported*

*† Data include dialysis patients only*

Table C.2.4  
**Incidence per million population, adjusted**  
*at day 1, adjusted for age and sex*

|                         | All   | Men   | Women |
|-------------------------|-------|-------|-------|
|                         | Pmp   | Pmp   | Pmp   |
| Albania                 | 144.4 | 185.4 | 105.3 |
| Belarus                 |       |       |       |
| Croatia †               | 103.1 | 135.8 | 71.9  |
| Cyprus                  | 260.3 | 359.1 | 166.1 |
| Czech Republic          |       |       |       |
| Hungary                 |       |       |       |
| Israel                  | 293.3 | 389.1 | 202.0 |
| Italy (8 of 20 regions) | 134.2 | 177.9 | 92.5  |
| Kosovo                  | 261.4 | 332.2 | 194.0 |
| Lithuania               | 88.0  | 114.7 | 62.4  |
| North Macedonia         | 211.6 | 268.6 | 157.3 |
| Poland                  |       |       |       |
| Portugal                |       |       |       |
| Russia                  |       |       |       |
| Slovakia †              | 132.8 | 171.3 | 96.1  |
| Spain                   |       |       |       |
| Turkey                  |       |       |       |

*When cells are left empty, the data are unavailable*

*† Data include dialysis patients only*

Table C.2.5  
Incidence per million population and percentages by primary renal disease, unadjusted  
at day 1

|                         | All   |     | GN   |      | PN   |      | PKD  |     | DM     |     |        |      |       |      | HT   |      | RVD  |     | Misc |      | Unkn |      | Missing |      |
|-------------------------|-------|-----|------|------|------|------|------|-----|--------|-----|--------|------|-------|------|------|------|------|-----|------|------|------|------|---------|------|
|                         |       |     |      |      |      |      |      |     | Type 1 |     | Type 2 |      | Both  |      |      |      |      |     |      |      |      |      |         |      |
|                         | Pmp   | %   | Pmp  | %    | Pmp  | %    | Pmp  | %   | Pmp    | %   | Pmp    | %    | Pmp   | %    | Pmp  | %    | Pmp  | %   | Pmp  | %    | Pmp  | %    | Pmp     | %    |
| Albania                 | 130.6 | 100 | 27.7 | 21.2 | 17.7 | 13.6 | 7.5  | 5.7 | 2.1    | 1.6 | 27.7   | 21.2 | 29.8  | 22.8 | 22.4 | 17.1 | 2.5  | 1.9 | 13.5 | 10.3 | 8.9  | 6.8  | 0.7     | 0.5  |
| Belarus *               | 74.2  | 100 | 16.4 | 22.1 | 6.4  | 8.6  | 5.3  | 7.2 | 3.6    | 4.9 | 11.8   | 15.9 | 15.5  | 20.8 | 8.3  | 11.2 | 4.2  | 5.6 | 17.8 | 24.0 | 0.3  | 0.4  | 0       | 0    |
| Croatia †               | 109.3 | 100 | 14.5 | 13.3 | 0    | 0    | 6.7  | 6.1 | 2.9    | 2.7 | 27.6   | 25.3 | 30.5  | 27.9 | 28.8 | 26.3 | 2.9  | 2.7 | 15.7 | 14.4 | 9.3  | 8.5  | 0.9     | 0.8  |
| Cyprus                  | 272.5 | 100 | 22.5 | 8.3  | 12.4 | 4.5  | 11.3 | 4.1 | 0      | 0   | 113.7  | 41.7 | 113.7 | 41.7 | 69.8 | 25.6 | 2.3  | 0.8 | 22.5 | 8.3  | 18.0 | 6.6  | 0       | 0    |
| Czech Republic          |       |     |      |      |      |      |      |     |        |     |        |      |       |      |      |      |      |     |      |      |      |      |         |      |
| Hungary                 | 198.8 | 100 | 16.5 | 8.3  | 15.4 | 7.7  | 8.0  | 4.0 | 7.5    | 3.8 | 46.9   | 23.6 | 54.5  | 27.4 | 49.3 | 24.8 | 11.2 | 5.6 | 24.1 | 12.1 | 19.9 | 10.0 | 0       | 0    |
| Israel                  | 195.0 | 100 | 11.3 | 5.8  | 3.5  | 1.8  | 5.5  | 2.8 | 2.0    | 1.0 | 85.3   | 43.7 | 87.2  | 44.7 | 20.9 | 10.7 | 2.1  | 1.1 | 24.0 | 12.3 | 29.3 | 15.0 | 11.2    | 5.7  |
| Italy (8 of 20 regions) | 158.6 | 100 | 17.0 | 10.7 | 8.1  | 5.1  | 8.9  | 5.6 |        |     |        |      | 24.2  | 15.3 | 22.3 | 14.0 | 5.3  | 3.3 | 12.9 | 8.2  | 42.8 | 27.0 | 17.0    | 10.7 |
| Kosovo                  | 126.8 | 100 | 4.1  | 3.3  | 35.0 | 27.6 | 5.3  | 4.2 | 4.1    | 3.3 | 36.1   | 28.5 | 40.3  | 31.8 | 26.1 | 20.6 | 0.6  | 0.5 | 8.9  | 7.0  | 6.5  | 5.1  | 0       | 0    |
| Lithuania               | 86.6  | 100 | 13.2 | 15.3 | 8.2  | 9.5  | 6.8  | 7.9 |        |     |        |      | 14.0  | 16.1 | 17.5 | 20.2 | 2.5  | 2.9 | 20.0 | 23.1 | 3.6  | 4.1  | 0.7     | 0.8  |
| North Macedonia         | 184.2 | 100 | 7.7  | 4.2  | 13.1 | 7.1  | 7.3  | 3.9 | 2.4    | 1.3 | 44.0   | 23.9 | 46.4  | 25.2 | 57.5 | 31.2 | 1.0  | 0.5 | 20.3 | 11.0 | 30.9 | 16.8 | 0       | 0    |
| Poland                  | 124.7 | 100 |      |      |      |      | 6.9  | 5.5 |        |     |        |      | 38.7  | 31.0 |      |      |      |     |      |      |      |      | 79.1    | 63.5 |
| Portugal + & ‡          | 229.3 | 100 | 26.8 | 11.7 |      |      | 11.1 | 4.8 |        |     |        |      | 75.1  | 32.7 | 32.7 | 14.3 |      |     | 45.0 | 19.6 | 35.9 | 15.7 | 0.7     | 0.3  |
| Russia †                | 84.5  | 100 | 19.7 | 23.4 | 9.6  | 11.4 | 7.4  | 8.7 | 5.4    | 6.3 | 14.9   | 17.6 | 20.2  | 24.0 | 12.9 | 15.3 | 1.2  | 1.4 | 13.4 | 15.8 | 0    | 0    | 0       | 0    |
| Slovakia †              | 124.9 | 100 | 14.8 | 11.9 | 9.7  | 7.8  | 5.6  | 4.4 |        |     |        |      | 37.7  | 30.2 | 10.4 | 8.3  | 3.7  | 3.0 | 39.8 | 31.9 | 3.2  | 2.6  | 0       | 0    |
| Spain ¶                 | 140.0 | 100 | 17.7 | 12.7 | 10.9 | 7.8  | 8.8  | 6.3 |        |     |        |      | 35.2  | 25.1 | 18.4 | 13.2 |      |     | 17.7 | 12.7 | 23.7 | 16.9 | 7.5     | 5.4  |
| Turkey                  | 138.7 | 100 | 2.2  | 1.6  | 0.3  | 0.2  | 1.1  | 0.8 | 1.0    | 0.7 | 7.4    | 5.4  | 8.5   | 6.1  | 6.6  | 4.7  | 0.2  | 0.1 | 2.8  | 2.0  | 4.5  | 3.2  | 112.6   | 81.2 |

Abbreviations used: GN: glomerulonephritis/sclerosis; PN: pyelonephritis; PKD: polycystic kidneys, adult type; DM: diabetes mellitus; HT: hypertension; RVD: renal vascular disease; Misc: miscellaneous; Unkn: unknown

Categories may not add up because of rounding off

When cells are left empty, the data are unavailable

\* Patients younger than 18 years of age are not reported

† Data include dialysis patients only

+ Renal vascular disease is not reported separately, but is included into miscellaneous

& Pyelonephritis is not reported separately, but is included into miscellaneous

‡ Data on primary renal disease are available for dialysis patients only (99.1% of total N=2361)

¶ Renal vascular disease is not reported separately, but is included into hypertension

Table C.2.6  
**Incident counts by treatment modality**  
*at day 1*

|                         | All   | Haemodialysis             |            |                    |    |     |                        | Peritoneal dialysis |      |                    |             | Preemptive kidney transplant |                   |                    |             | Missing |
|-------------------------|-------|---------------------------|------------|--------------------|----|-----|------------------------|---------------------|------|--------------------|-------------|------------------------------|-------------------|--------------------|-------------|---------|
|                         |       | HD<br>hospital/<br>centre | HD<br>home | HD<br>type<br>Unkn | HF | HDF | Total<br>HD/<br>HF/HDF | APD                 | CAPD | PD<br>type<br>Unkn | Total<br>PD | Living<br>donor              | Deceased<br>donor | Tx<br>type<br>Unkn | Total<br>Tx |         |
|                         | N     | N                         | N          | N                  | N  | N   | N                      | N                   | N    | N                  | N           | N                            | N                 | N                  | N           | N       |
| Albania                 | 368   | 341                       | 0          | 0                  | 0  | 0   | 341                    | 0                   | 13   | 0                  | 13          | 2                            | 0                 | 0                  | 2           | 12      |
| Belarus *               | 696   | 620                       | 0          | 0                  | 0  | 35  | 655                    | 3                   | 21   | 0                  | 24          | 0                            | 17                | 0                  | 17          | 0       |
| Croatia †               | 376   | 308                       | 0          | 0                  | 0  | 45  | 353                    |                     |      | 23                 | 23          |                              |                   |                    |             | 0       |
| Cyprus                  | 242   | 224                       | 0          | 0                  | 0  | 0   | 224                    | 0                   | 17   | 0                  | 17          | 1                            | 0                 | 0                  | 1           | 0       |
| Czech Republic †        | 2230  |                           |            | 2161               |    |     | 2161                   |                     |      | 69                 | 69          |                              |                   |                    |             | 0       |
| Hungary                 | 1923  | 1668                      | 0          | 0                  | 0  | 0   | 1668                   |                     |      | 250                | 250         |                              |                   | 5                  | 5           | 0       |
| Israel                  | 1797  | 1455                      | 0          | 0                  | 0  | 54  | 1509                   | 75                  | 152  | 1                  | 228         | 55                           | 3                 | 2                  | 60          | 0       |
| Italy (8 of 20 regions) | 3405  | 2078                      | 8          | 466                | 23 | 234 | 2809                   | 220                 | 297  | 0                  | 517         | 21                           | 58                | 0                  | 79          | 0       |
| Kosovo                  | 214   | 214                       | 0          | 0                  | 0  | 0   | 214                    | 0                   | 0    | 0                  | 0           | 0                            | 0                 | 0                  | 0           | 0       |
| Lithuania               | 242   | 217                       | 0          | 0                  | 0  | 0   | 217                    |                     |      | 18                 | 18          | 0                            | 7                 | 0                  | 7           | 0       |
| North Macedonia         | 381   | 375                       | 0          | 0                  | 0  | 0   | 375                    | 0                   | 1    | 0                  | 1           | 3                            | 2                 | 0                  | 5           | 0       |
| Poland                  | 4781  | 4457                      | 0          | 0                  | 0  | 0   | 4457                   |                     |      | 277                | 277         |                              |                   | 47                 | 47          | 0       |
| Portugal                | 2361  |                           |            | 2101               |    |     | 2101                   |                     |      | 239                | 239         |                              |                   | 21                 | 21          | 0       |
| Russia †                | 12103 | 10589                     | 0          | 0                  | 0  | 676 | 11265                  | 226                 | 612  | 0                  | 838         |                              |                   |                    |             | 0       |
| Slovakia †              | 540   | 142                       | 0          | 0                  | 0  | 384 | 526                    | 7                   | 7    | 0                  | 14          |                              |                   |                    |             | 0       |
| Spain                   | 6643  |                           |            | 5289               |    |     | 5289                   |                     |      | 1065               | 1065        |                              |                   | 289                | 289         | 0       |
| Turkey                  | 11596 | 8989                      | 39         | 19                 | 0  | 34  | 9081                   | 273                 | 902  | 0                  | 1175        | 1335                         | 5                 | 0                  | 1340        | 0       |

Abbreviations used: HD: haemodialysis; Unkn: unknown; HF: haemofiltration; HDF: haemodiafiltration; APD: automated peritoneal dialysis; CAPD: continuous ambulatory peritoneal dialysis; PD: peritoneal dialysis; Tx: transplant  
When cells are left empty, the data are unavailable

\* Patients younger than 18 years of age are not reported

† Data include dialysis patients only

Table C.2.7  
Incidence per million population by treatment modality, unadjusted  
at day 1

|                         | All   | Haemodialysis             |            |                    |     |      |                        | Peritoneal dialysis |      |                    |             | Preemptive kidney transplant |                   |                    |             | Missing |
|-------------------------|-------|---------------------------|------------|--------------------|-----|------|------------------------|---------------------|------|--------------------|-------------|------------------------------|-------------------|--------------------|-------------|---------|
|                         |       | HD<br>hospital/<br>centre | HD<br>home | HD<br>type<br>Unkn | HF  | HDF  | Total<br>HD/<br>HF/HDF | APD                 | CAPD | PD<br>type<br>Unkn | Total<br>PD | Living<br>donor              | Deceased<br>donor | Tx<br>type<br>Unkn | Total<br>Tx |         |
|                         | Pmp   | Pmp                       | Pmp        | Pmp                | Pmp | Pmp  | Pmp                    | Pmp                 | Pmp  | Pmp                | Pmp         | Pmp                          | Pmp               | Pmp                | Pmp         | Pmp     |
| Albania                 | 130.6 | 121.0                     | 0          | 0                  | 0   | 0    | 121.0                  | 0                   | 4.6  | 0                  | 4.6         | 0.7                          | 0                 | 0                  | 0.7         | 4.3     |
| Belarus *               | 74.2  | 66.1                      | 0          | 0                  | 0   | 3.7  | 69.8                   | 0.3                 | 2.2  | 0                  | 2.6         | 0                            | 1.8               | 0                  | 1.8         | 0       |
| Croatia †               | 109.3 | 89.5                      | 0          | 0                  | 0   | 13.1 | 102.6                  |                     |      | 6.7                | 6.7         |                              |                   |                    |             | 0       |
| Cyprus                  | 272.5 | 252.3                     | 0          | 0                  | 0   | 0    | 252.3                  | 0                   | 19.1 | 0                  | 19.1        | 1.1                          | 0                 | 0                  | 1.1         | 0       |
| Czech Republic †        | 212.6 |                           |            | 206.1              |     |      | 206.1                  |                     |      | 6.6                | 6.6         |                              |                   |                    |             | 0       |
| Hungary                 | 198.8 | 172.5                     | 0          | 0                  | 0   | 0    | 172.5                  |                     |      | 25.8               | 25.8        |                              |                   | 0.5                | 0.5         | 0       |
| Israel                  | 195.0 | 157.9                     | 0          | 0                  | 0   | 5.9  | 163.8                  | 8.1                 | 16.5 | 0.1                | 24.7        | 6.0                          | 0.3               | 0.2                | 6.5         | 0       |
| Italy (8 of 20 regions) | 158.6 | 96.8                      | 0.4        | 21.7               | 1.1 | 10.9 | 130.8                  | 10.2                | 13.8 | 0                  | 24.1        | 1.0                          | 2.7               | 0                  | 3.7         | 0       |
| Kosovo                  | 126.8 | 126.8                     | 0          | 0                  | 0   | 0    | 126.8                  | 0                   | 0    | 0                  | 0           | 0                            | 0                 | 0                  | 0           | 0       |
| Lithuania               | 86.6  | 77.7                      | 0          | 0                  | 0   | 0    | 77.7                   |                     |      | 6.4                | 6.4         | 0                            | 2.5               | 0                  | 2.5         | 0       |
| North Macedonia         | 184.2 | 181.3                     | 0          | 0                  | 0   | 0    | 181.3                  | 0                   | 0.5  | 0                  | 0.5         | 1.5                          | 1.0               | 0                  | 2.4         | 0       |
| Poland                  | 124.7 | 116.2                     | 0          | 0                  | 0   | 0    | 116.2                  |                     |      | 7.2                | 7.2         |                              |                   | 1.2                | 1.2         | 0       |
| Portugal                | 229.3 |                           |            | 204.0              |     |      | 204.0                  |                     |      | 23.2               | 23.2        |                              |                   | 2.0                | 2.0         | 0       |
| Russia †                | 84.5  | 73.9                      | 0          | 0                  | 0   | 4.7  | 78.6                   | 1.6                 | 4.3  | 0                  | 5.9         |                              |                   |                    |             | 0       |
| Slovakia †              | 124.9 | 32.8                      | 0          | 0                  | 0   | 88.8 | 121.6                  | 1.6                 | 1.6  | 0                  | 3.2         |                              |                   |                    |             | 0       |
| Spain                   | 140.0 |                           |            | 111.5              |     |      | 111.5                  |                     |      | 22.4               | 22.4        |                              |                   | 6.1                | 6.1         | 0       |
| Turkey                  | 138.7 | 107.5                     | 0.5        | 0.2                | 0   | 0.4  | 108.6                  | 3.3                 | 10.8 | 0                  | 14.1        | 16.0                         | 0.1               | 0                  | 16.0        | 0       |

Abbreviations used: HD: haemodialysis; Unkn: unknown; HF: haemofiltration; HDF: haemodiafiltration; APD: automated peritoneal dialysis; CAPD: continuous ambulatory peritoneal dialysis; PD: peritoneal dialysis; Tx: transplant  
Categories may not add up because of rounding off

When cells are left empty, the data are unavailable

\* Patients younger than 18 years of age are not reported

† Data include dialysis patients only



Table C.2.8  
**Treatment modality distribution, unadjusted**  
*at day 1*

|                         | All | Haemodialysis      |         |              |     |      |                 | Peritoneal dialysis |      |              |          | Preemptive kidney transplant |                |              |          | Missing |
|-------------------------|-----|--------------------|---------|--------------|-----|------|-----------------|---------------------|------|--------------|----------|------------------------------|----------------|--------------|----------|---------|
|                         |     | HD hospital/centre | HD home | HD type Unkn | HF  | HDF  | Total HD/HF/HDF | APD                 | CAPD | PD type Unkn | Total PD | Living donor                 | Deceased donor | Tx type Unkn | Total Tx |         |
|                         |     | %                  | %       | %            | %   | %    | %               | %                   | %    | %            | %        | %                            | %              | %            | %        |         |
| Albania                 | 100 | 92.7               | 0       | 0            | 0   | 0    | 92.7            | 0                   | 3.5  | 0            | 3.5      | 0.5                          | 0              | 0            | 0.5      | 3.3     |
| Belarus *               | 100 | 89.1               | 0       | 0            | 0   | 5.0  | 94.1            | 0.4                 | 3.0  | 0            | 3.4      | 0                            | 2.4            | 0            | 2.4      | 0       |
| Croatia †               | 100 | 81.9               | 0       | 0            | 0   | 12.0 | 93.9            |                     |      | 6.1          | 6.1      |                              |                |              |          | 0       |
| Cyprus                  | 100 | 92.6               | 0       | 0            | 0   | 0    | 92.6            | 0                   | 7.0  | 0            | 7.0      | 0.4                          | 0              | 0            | 0.4      | 0       |
| Czech Republic †        | 100 |                    |         | 96.9         |     |      | 96.9            |                     |      | 3.1          | 3.1      |                              |                |              |          | 0       |
| Hungary                 | 100 | 86.7               | 0       | 0            | 0   | 0    | 86.7            |                     |      | 13.0         | 13.0     |                              |                | 0.3          | 0.3      | 0       |
| Israel                  | 100 | 81.0               | 0       | 0            | 0   | 3.0  | 84.0            | 4.2                 | 8.5  | 0.1          | 12.7     | 3.1                          | 0.2            | 0.1          | 3.3      | 0       |
| Italy (8 of 20 regions) | 100 | 61.0               | 0.2     | 13.7         | 0.7 | 6.9  | 82.5            | 6.5                 | 8.7  | 0            | 15.2     | 0.6                          | 1.7            | 0            | 2.3      | 0       |
| Kosovo                  | 100 | 100                | 0       | 0            | 0   | 0    | 100             | 0                   | 0    | 0            | 0        | 0                            | 0              | 0            | 0        | 0       |
| Lithuania               | 100 | 89.7               | 0       | 0            | 0   | 0    | 89.7            |                     |      | 7.4          | 7.4      | 0                            | 2.9            | 0            | 2.9      | 0       |
| North Macedonia         | 100 | 98.4               | 0       | 0            | 0   | 0    | 98.4            | 0                   | 0.3  | 0            | 0.3      | 0.8                          | 0.5            | 0            | 1.3      | 0       |
| Poland                  | 100 | 93.2               | 0       | 0            | 0   | 0    | 93.2            |                     |      | 5.8          | 5.8      |                              |                | 1.0          | 1.0      | 0       |
| Portugal                | 100 |                    |         | 89.0         |     |      | 89.0            |                     |      | 10.1         | 10.1     |                              |                | 0.9          | 0.9      | 0       |
| Russia †                | 100 | 87.5               | 0       | 0            | 0   | 5.6  | 93.1            | 1.9                 | 5.1  | 0            | 6.9      |                              |                |              |          | 0       |
| Slovakia †              | 100 | 26.3               | 0       | 0            | 0   | 71.1 | 97.4            | 1.3                 | 1.3  | 0            | 2.6      |                              |                |              |          | 0       |
| Spain                   | 100 |                    |         | 79.6         |     |      | 79.6            |                     |      | 16.0         | 16.0     |                              |                | 4.4          | 4.4      | 0       |
| Turkey                  | 100 | 77.5               | 0.3     | 0.2          | 0   | 0.3  | 78.3            | 2.4                 | 7.8  | 0            | 10.1     | 11.5                         | 0              | 0            | 11.6     | 0       |

Abbreviations used: HD: haemodialysis; Unkn: unknown; HF: haemofiltration; HDF: haemodiafiltration; APD: automated peritoneal dialysis; CAPD: continuous ambulatory peritoneal dialysis; PD: peritoneal dialysis; Tx: transplant

Categories may not add up because of rounding off

When cells are left empty, the data are unavailable

\* Patients younger than 18 years of age are not reported

† Data include dialysis patients only

Table C.3.1  
**Incident counts and percentages by age and sex**  
*at day 91*

|                         | All      |          |          | 0-19 |   |     |   |       |   | 20-44 |    |     |    |       |    | 45-64 |    |     |    |       |    | 65-74 |    |     |    |       |    | 75+  |    |     |    |     |    |
|-------------------------|----------|----------|----------|------|---|-----|---|-------|---|-------|----|-----|----|-------|----|-------|----|-----|----|-------|----|-------|----|-----|----|-------|----|------|----|-----|----|-----|----|
|                         | All      | Men      | Women    | All  |   | Men |   | Women |   | All   |    | Men |    | Women |    | All   |    | Men |    | Women |    | All   |    | Men |    | Women |    |      |    |     |    |     |    |
|                         | N (100%) | N (100%) | N (100%) | N    | % | N   | % | N     | % | N     | %  | N   | %  | N     | %  | N     | %  | N   | %  | N     | %  | N     | %  | N   | %  | N     | %  |      |    |     |    |     |    |
| Albania                 | 329      | 213      | 116      | 1    | 0 | 1   | 0 | 0     | 0 | 48    | 15 | 32  | 15 | 16    | 14 | 135   | 41 | 89  | 42 | 46    | 40 | 103   | 31 | 63  | 30 | 40    | 34 | 42   | 13 | 28  | 13 | 14  | 12 |
| Belarus *               | 549      | 317      | 232      | 1    | 0 | 1   | 0 | 0     | 0 | 116   | 21 | 76  | 24 | 40    | 17 | 245   | 45 | 145 | 46 | 100   | 43 | 147   | 27 | 71  | 22 | 76    | 33 | 40   | 7  | 24  | 8  | 16  | 7  |
| Croatia †               | 319      | 201      | 118      | 0    | 0 | 0   | 0 | 0     | 0 | 18    | 6  | 11  | 5  | 7     | 6  | 90    | 28 | 56  | 28 | 34    | 29 | 92    | 29 | 60  | 30 | 32    | 27 | 119  | 37 | 74  | 37 | 45  | 38 |
| Cyprus                  | 235      | 156      | 79       | 0    | 0 | 0   | 0 | 0     | 0 | 12    | 5  | 8   | 5  | 4     | 5  | 55    | 23 | 35  | 22 | 20    | 25 | 74    | 31 | 54  | 35 | 20    | 25 | 94   | 40 | 59  | 38 | 35  | 44 |
| Czech Republic          |          |          |          |      |   |     |   |       |   |       |    |     |    |       |    |       |    |     |    |       |    |       |    |     |    |       |    |      |    |     |    |     |    |
| Hungary                 |          |          |          |      |   |     |   |       |   |       |    |     |    |       |    |       |    |     |    |       |    |       |    |     |    |       |    |      |    |     |    |     |    |
| Israel                  | 1687     | 1108     | 579      | 24   | 1 | 13  | 1 | 11    | 2 | 137   | 8  | 88  | 8  | 49    | 8  | 482   | 29 | 317 | 29 | 165   | 28 | 519   | 31 | 349 | 31 | 170   | 29 | 525  | 31 | 341 | 31 | 184 | 32 |
| Italy (8 of 20 regions) | 3005     | 1964     | 1041     | 18   | 1 | 11  | 1 | 7     | 1 | 218   | 7  | 147 | 7  | 71    | 7  | 828   | 28 | 528 | 27 | 300   | 29 | 835   | 28 | 569 | 29 | 266   | 26 | 1106 | 37 | 709 | 36 | 397 | 38 |
| Kosovo                  | 161      | 100      | 61       | 2    | 1 | 0   | 0 | 2     | 3 | 24    | 15 | 14  | 14 | 10    | 16 | 56    | 35 | 32  | 32 | 24    | 39 | 49    | 30 | 28  | 28 | 21    | 34 | 30   | 19 | 26  | 26 | 4   | 7  |
| Lithuania               | 238      | 138      | 100      | 4    | 2 | 2   | 1 | 2     | 2 | 35    | 15 | 21  | 15 | 14    | 14 | 91    | 38 | 51  | 37 | 40    | 40 | 51    | 21 | 38  | 28 | 13    | 13 | 57   | 24 | 26  | 19 | 31  | 31 |
| North Macedonia         | 271      | 174      | 97       | 5    | 2 | 3   | 2 | 2     | 2 | 25    | 9  | 19  | 11 | 6     | 6  | 109   | 40 | 62  | 36 | 47    | 48 | 77    | 28 | 50  | 29 | 27    | 28 | 55   | 20 | 40  | 23 | 15  | 15 |
| Poland                  |          |          |          |      |   |     |   |       |   |       |    |     |    |       |    |       |    |     |    |       |    |       |    |     |    |       |    |      |    |     |    |     |    |
| Portugal                | 2245     |          |          |      |   |     |   |       |   |       |    |     |    |       |    |       |    |     |    |       |    |       |    |     |    |       |    |      |    |     |    |     |    |
| Russia                  |          |          |          |      |   |     |   |       |   |       |    |     |    |       |    |       |    |     |    |       |    |       |    |     |    |       |    |      |    |     |    |     |    |
| Slovakia †              | 382      | 239      | 143      | 0    | 0 | 0   | 0 | 0     | 0 | 35    | 9  | 25  | 10 | 10    | 7  | 144   | 38 | 97  | 41 | 47    | 33 | 130   | 34 | 74  | 31 | 56    | 39 | 73   | 19 | 43  | 18 | 30  | 21 |
| Spain                   |          |          |          |      |   |     |   |       |   |       |    |     |    |       |    |       |    |     |    |       |    |       |    |     |    |       |    |      |    |     |    |     |    |
| Turkey                  |          |          |          |      |   |     |   |       |   |       |    |     |    |       |    |       |    |     |    |       |    |       |    |     |    |       |    |      |    |     |    |     |    |

*Categories may not add up because of missing values or rounding off*

*When cells are left empty, the data are unavailable*

*\* Patients younger than 18 years of age are not reported*

*† Data include dialysis patients only*

Table C.3.2  
Incidence per million (age-related) population by age and sex, unadjusted  
at day 91

|                         | All   |       |       | 0-19  |       |       | 20-44 |       |       | 45-64 |       |       | 65-74 |        |       | 75+    |        |        |
|-------------------------|-------|-------|-------|-------|-------|-------|-------|-------|-------|-------|-------|-------|-------|--------|-------|--------|--------|--------|
|                         | All   | Men   | Women | All   | Men    | Women | All    | Men    | Women  |
|                         | Pmp   | Pmp   | Pmp   | Pmarp  | Pmarp | Pmarp  | Pmarp  | Pmarp  |
| Albania                 | 116.8 | 151.4 | 82.2  | 1.5   | 2.9   | 0     | 48.5  | 63.8  | 32.8  | 181.8 | 246.0 | 120.8 | 412.7 | 520.0  | 311.5 | 252.6  | 352.0  | 161.4  |
| Belarus *               | 58.5  | 73.1  | 46.0  | 0.5   | 0.9   | 0     | 35.9  | 47.5  | 24.5  | 93.1  | 121.1 | 69.7  | 164.4 | 209.0  | 137.0 | 69.9   | 164.7  | 37.5   |
| Croatia †               | 92.7  | 120.2 | 66.7  | 0     | 0     | 0     | 16.5  | 19.5  | 13.2  | 94.0  | 119.1 | 69.8  | 225.2 | 325.7  | 142.7 | 366.5  | 633.7  | 216.4  |
| Cyprus                  | 264.6 | 359.0 | 174.2 | 0     | 0     | 0     | 35.2  | 48.1  | 22.9  | 261.4 | 336.9 | 187.8 | 885.2 | 1350.0 | 458.7 | 1535.9 | 2201.5 | 1017.4 |
| Czech Republic          |       |       |       |       |       |       |       |       |       |       |       |       |       |        |       |        |        |        |
| Hungary                 |       |       |       |       |       |       |       |       |       |       |       |       |       |        |       |        |        |        |
| Israel                  | 183.1 | 242.2 | 124.8 | 7.2   | 7.7   | 6.8   | 45.0  | 57.5  | 32.3  | 276.1 | 372.5 | 184.4 | 780.7 | 1129.8 | 477.7 | 1177.1 | 1830.4 | 708.5  |
| Italy (8 of 20 regions) | 140.0 | 187.8 | 94.5  | 4.7   | 5.6   | 3.8   | 35.4  | 47.0  | 23.4  | 127.4 | 165.7 | 90.5  | 341.3 | 492.7  | 206.0 | 434.9  | 694.3  | 260.9  |
| Kosovo                  | 95.4  | 117.7 | 72.8  | 3.1   | 0     | 6.5   | 37.1  | 43.3  | 31.0  | 196.2 | 227.5 | 165.9 | 648.8 | 766.5  | 538.5 | 794.6  | 1583.0 | 187.5  |
| Lithuania               | 85.2  | 105.8 | 67.1  | 7.2   | 7.0   | 7.4   | 40.1  | 46.2  | 33.4  | 112.2 | 134.9 | 92.3  | 181.5 | 351.9  | 75.1  | 207.3  | 324.7  | 159.1  |
| North Macedonia         | 131.0 | 168.1 | 93.9  | 11.1  | 12.9  | 9.2   | 33.0  | 48.9  | 16.2  | 195.7 | 222.9 | 168.7 | 389.9 | 545.9  | 255.0 | 510.3  | 892.4  | 238.3  |
| Poland                  |       |       |       |       |       |       |       |       |       |       |       |       |       |        |       |        |        |        |
| Portugal                | 218.0 |       |       |       |       |       |       |       |       |       |       |       |       |        |       |        |        |        |
| Russia                  |       |       |       |       |       |       |       |       |       |       |       |       |       |        |       |        |        |        |
| Slovakia †              | 88.3  | 113.2 | 64.6  | 0     | 0     | 0     | 22.9  | 31.9  | 13.4  | 123.7 | 168.8 | 79.8  | 281.7 | 366.8  | 215.7 | 263.8  | 460.4  | 163.6  |
| Spain                   |       |       |       |       |       |       |       |       |       |       |       |       |       |        |       |        |        |        |
| Turkey                  |       |       |       |       |       |       |       |       |       |       |       |       |       |        |       |        |        |        |

When cells are left empty, the data are unavailable

\* Patients younger than 18 years of age are not reported

† Data include dialysis patients only

Table C.3.3  
**Sex, mean age, and median age of incident patients**  
*at day 91*

|                         | All |              |      |                |      |      | Men  |              |      |                |      |      | Women |              |      |                |      |      |
|-------------------------|-----|--------------|------|----------------|------|------|------|--------------|------|----------------|------|------|-------|--------------|------|----------------|------|------|
|                         | %   | Mean (years) | SD   | Median (years) | P25  | P75  | %    | Mean (years) | SD   | Median (years) | P25  | P75  | %     | Mean (years) | SD   | Median (years) | P25  | P75  |
| Albania                 | 100 | 60.7         | 14.8 | 63.0           | 54.5 | 71.0 | 64.7 | 61.0         | 14.7 | 63.0           | 55.0 | 71.8 | 35.3  | 60.2         | 14.8 | 63.0           | 53.0 | 70.5 |
| Belarus *               | 100 |              |      |                |      |      | 57.7 |              |      |                |      |      | 42.3  |              |      |                |      |      |
| Croatia †               | 100 | 68.1         | 14.8 | 69.0           | 60.0 | 77.0 | 63.0 | 68.6         | 14.4 | 69.0           | 59.0 | 76.0 | 37.0  | 67.3         | 15.4 | 69.0           | 61.0 | 78.0 |
| Cyprus                  | 100 | 70.0         | 12.8 | 72.0           | 63.0 | 79.0 | 66.4 | 70.0         | 12.8 | 72.0           | 63.0 | 79.0 | 33.6  | 70.0         | 13.0 | 72.0           | 63.0 | 79.0 |
| Czech Republic          |     |              |      |                |      |      |      |              |      |                |      |      |       |              |      |                |      |      |
| Hungary                 |     |              |      |                |      |      |      |              |      |                |      |      |       |              |      |                |      |      |
| Israel                  | 100 | 66.5         | 15.5 | 68.9           | 59.8 | 77.7 | 65.7 | 66.5         | 15.3 | 68.8           | 59.6 | 77.4 | 34.3  | 66.5         | 15.9 | 69.1           | 60.2 | 78.0 |
| Italy (8 of 20 regions) | 100 | 68.0         | 14.9 | 70.9           | 59.0 | 78.9 | 65.4 | 67.9         | 14.8 | 70.8           | 59.1 | 78.8 | 34.6  | 68.1         | 14.9 | 71.0           | 58.7 | 79.2 |
| Kosovo                  | 100 | 60.9         | 14.4 | 64.0           | 53.0 | 71.0 | 62.1 | 63.0         | 13.4 | 66.0           | 54.0 | 75.0 | 37.9  | 57.4         | 15.5 | 62.0           | 48.0 | 70.0 |
| Lithuania               | 100 | 60.4         | 17.1 | 61.8           | 49.2 | 73.6 | 58.0 | 60.0         | 16.3 | 62.3           | 49.5 | 71.7 | 42.0  | 61.1         | 18.2 | 61.1           | 48.1 | 76.6 |
| North Macedonia         | 100 | 62.5         | 14.8 | 64.0           | 55.0 | 73.0 | 64.2 | 63.1         | 15.1 | 65.0           | 55.0 | 73.5 | 35.8  | 61.4         | 14.3 | 63.0           | 54.0 | 72.0 |
| Poland                  |     |              |      |                |      |      |      |              |      |                |      |      |       |              |      |                |      |      |
| Portugal                |     |              |      |                |      |      |      |              |      |                |      |      |       |              |      |                |      |      |
| Russia                  |     |              |      |                |      |      |      |              |      |                |      |      |       |              |      |                |      |      |
| Slovakia †              | 100 | 63.5         | 13.3 | 65.0           | 56.0 | 73.0 | 62.6 | 62.3         | 13.9 | 64.0           | 52.0 | 72.0 | 37.4  | 65.5         | 12.1 | 68.0           | 60.0 | 74.0 |
| Spain                   |     |              |      |                |      |      |      |              |      |                |      |      |       |              |      |                |      |      |
| Turkey                  |     |              |      |                |      |      |      |              |      |                |      |      |       |              |      |                |      |      |

*Categories may not add up because of missing values or rounding off*

*When cells are left empty, the data are unavailable*

*\* Patients younger than 18 years of age are not reported*

*† Data include dialysis patients only*

Table C.3.4  
**Incidence per million population, adjusted**  
*at day 91, adjusted for age and sex*

|                         | All   | Men   | Women |
|-------------------------|-------|-------|-------|
|                         | Pmp   | Pmp   | Pmp   |
| Albania                 | 125.9 | 163.0 | 90.4  |
| Belarus                 |       |       |       |
| Croatia †               | 87.2  | 114.6 | 61.1  |
| Cyprus                  | 254.8 | 350.4 | 163.7 |
| Czech Republic          |       |       |       |
| Hungary                 |       |       |       |
| Israel                  | 274.4 | 363.9 | 189.0 |
| Italy (8 of 20 regions) | 119.1 | 157.6 | 82.4  |
| Kosovo                  | 192.3 | 255.2 | 132.4 |
| Lithuania               | 86.3  | 111.3 | 62.4  |
| North Macedonia         | 147.4 | 194.5 | 102.5 |
| Poland                  |       |       |       |
| Portugal                |       |       |       |
| Russia                  |       |       |       |
| Slovakia †              | 93.7  | 124.4 | 64.4  |
| Spain                   |       |       |       |
| Turkey                  |       |       |       |

*When cells are left empty, the data are unavailable*

*† Data include dialysis patients only*

Table C.3.5  
**Incidence per million population and percentages by primary renal disease, unadjusted**  
*at day 91*

|                         | All   |     | GN   |      | PN   |      | PKD  |     | DM     |     |        |      |       |      | HT   |      | RVD |     | Misc |      | Unkn |      | Missing |      |
|-------------------------|-------|-----|------|------|------|------|------|-----|--------|-----|--------|------|-------|------|------|------|-----|-----|------|------|------|------|---------|------|
|                         |       |     |      |      |      |      |      |     | Type 1 |     | Type 2 |      | Both  |      |      |      |     |     |      |      |      |      |         |      |
|                         | Pmp   | %   | Pmp  | %    | Pmp  | %    | Pmp  | %   | Pmp    | %   | Pmp    | %    | Pmp   | %    | Pmp  | %    | Pmp | %   | Pmp  | %    | Pmp  | %    | Pmp     | %    |
| Albania                 | 116.8 | 100 | 27.7 | 23.7 | 16.7 | 14.3 | 7.5  | 6.4 | 1.4    | 1.2 | 23.1   | 19.8 | 24.5  | 21.0 | 19.2 | 16.4 | 1.8 | 1.5 | 12.1 | 10.3 | 6.4  | 5.5  | 1.1     | 0.9  |
| Belarus *               | 58.5  | 100 | 14.3 | 24.4 | 5.3  | 9.1  | 4.7  | 8.0 | 3.1    | 5.3 | 9.0    | 15.3 | 12.0  | 20.6 | 7.2  | 12.4 | 2.1 | 3.6 | 12.6 | 21.5 | 0.2  | 0.4  | 0       | 0    |
| Croatia †               | 92.7  | 100 | 9.9  | 10.7 | 0    | 0    | 6.4  | 6.9 | 2.6    | 2.8 | 25.9   | 27.9 | 28.5  | 30.7 | 25.9 | 27.9 | 2.6 | 2.8 | 14.8 | 16.0 | 4.7  | 5.0  | 0       | 0    |
| Cyprus                  | 264.6 | 100 | 22.5 | 8.5  | 11.3 | 4.3  | 11.3 | 4.3 | 0      | 0   | 110.4  | 41.7 | 110.4 | 41.7 | 68.7 | 26.0 | 1.1 | 0.4 | 21.4 | 8.1  | 18.0 | 6.8  | 0       | 0    |
| Czech Republic          |       |     |      |      |      |      |      |     |        |     |        |      |       |      |      |      |     |     |      |      |      |      |         |      |
| Hungary                 |       |     |      |      |      |      |      |     |        |     |        |      |       |      |      |      |     |     |      |      |      |      |         |      |
| Israel                  | 183.1 | 100 | 11.1 | 6.0  | 3.4  | 1.8  | 5.4  | 3.0 | 2.0    | 1.1 | 80.2   | 43.8 | 82.1  | 44.9 | 19.9 | 10.8 | 2.0 | 1.1 | 22.2 | 12.2 | 26.9 | 14.7 | 10.1    | 5.5  |
| Italy (8 of 20 regions) | 140.0 | 100 | 15.1 | 10.8 | 6.9  | 5.0  | 8.1  | 5.8 |        |     |        |      | 21.7  | 15.5 | 19.4 | 13.8 | 4.7 | 3.3 | 11.4 | 8.2  | 36.2 | 25.9 | 16.4    | 11.7 |
| Kosovo                  | 95.4  | 100 | 3.6  | 3.7  | 24.9 | 26.1 | 5.3  | 5.6 | 3.0    | 3.1 | 26.1   | 27.3 | 29.0  | 30.4 | 21.3 | 22.4 | 0.6 | 0.6 | 5.3  | 5.6  | 5.3  | 5.6  | 0       | 0    |
| Lithuania               | 85.2  | 100 | 13.2 | 15.5 | 8.2  | 9.7  | 6.8  | 8.0 |        |     |        |      | 14.0  | 16.4 | 17.2 | 20.2 | 1.8 | 2.1 | 19.7 | 23.1 | 3.6  | 4.2  | 0.7     | 0.8  |
| North Macedonia         | 131.0 | 100 | 5.8  | 4.4  | 7.7  | 5.9  | 6.8  | 5.2 | 1.5    | 1.1 | 29.5   | 22.5 | 30.9  | 23.6 | 43.0 | 32.8 | 1.0 | 0.7 | 14.5 | 11.1 | 21.3 | 16.2 | 0       | 0    |
| Poland                  |       |     |      |      |      |      |      |     |        |     |        |      |       |      |      |      |     |     |      |      |      |      |         |      |
| Portugal                |       |     |      |      |      |      |      |     |        |     |        |      |       |      |      |      |     |     |      |      |      |      |         |      |
| Russia                  |       |     |      |      |      |      |      |     |        |     |        |      |       |      |      |      |     |     |      |      |      |      |         |      |
| Slovakia †              | 88.3  | 100 | 11.6 | 13.1 | 6.2  | 7.1  | 5.1  | 5.8 |        |     |        |      | 27.5  | 31.2 | 10.4 | 11.8 | 3.0 | 3.4 | 22.7 | 25.7 | 1.9  | 2.1  | 0       | 0    |
| Spain                   |       |     |      |      |      |      |      |     |        |     |        |      |       |      |      |      |     |     |      |      |      |      |         |      |
| Turkey                  |       |     |      |      |      |      |      |     |        |     |        |      |       |      |      |      |     |     |      |      |      |      |         |      |

Abbreviations used: GN: glomerulonephritis/sclerosis; PN: pyelonephritis; PKD: polycystic kidneys, adult type; DM: diabetes mellitus; HT: hypertension; RVD: renal vascular disease; Misc: miscellaneous; Unkn: unknown

Categories may not add up because of rounding off

When cells are left empty, the data are unavailable

\* Patients younger than 18 years of age are not reported

† Data include dialysis patients only

**C3 INCIDENT PATIENTS ACCEPTED FOR KRT IN 2020, AT DAY 91**

**Table C.3.6**  
**Incident counts by treatment modality**  
*at day 91*

|                         | All  | Haemodialysis      |         |              |    |     |                 | Peritoneal dialysis |      |              |          | Kidney transplant |                |              |          | Missing |
|-------------------------|------|--------------------|---------|--------------|----|-----|-----------------|---------------------|------|--------------|----------|-------------------|----------------|--------------|----------|---------|
|                         |      | HD hospital/centre | HD home | HD type Unkn | HF | HDF | Total HD/HF/HDF | APD                 | CAPD | PD type Unkn | Total PD | Living donor      | Deceased donor | Tx type Unkn | Total Tx |         |
|                         |      | N                  | N       | N            | N  | N   | N               | N                   | N    | N            | N        | N                 | N              | N            | N        |         |
| Albania                 | 329  | 299                | 0       | 0            | 0  | 0   | 299             | 0                   | 13   | 0            | 13       | 4                 | 0              | 0            | 4        | 13      |
| Belarus *               | 549  | 440                | 0       | 0            | 0  | 58  | 498             | 6                   | 29   | 0            | 35       | 0                 | 16             | 0            | 16       | 0       |
| Croatia †               | 319  | 261                | 0       | 0            | 0  | 39  | 300             |                     |      | 19           | 19       |                   |                |              |          | 0       |
| Cyprus                  | 235  | 217                | 0       | 0            | 0  | 0   | 217             | 0                   | 17   | 0            | 17       | 0                 | 1              | 0            | 1        | 0       |
| Czech Republic          |      |                    |         |              |    |     |                 |                     |      |              |          |                   |                |              |          |         |
| Hungary                 |      |                    |         |              |    |     |                 |                     |      |              |          |                   |                |              |          |         |
| Israel                  | 1687 | 1342               | 0       | 0            | 0  | 50  | 1392            | 75                  | 146  | 1            | 222      | 66                | 3              | 4            | 73       | 0       |
| Italy (8 of 20 regions) | 3005 | 1772               | 8       | 441          | 21 | 208 | 2450            | 204                 | 272  | 0            | 476      | 21                | 58             | 0            | 79       | 0       |
| Kosovo                  | 161  | 161                | 0       | 0            | 0  | 0   | 161             | 0                   | 0    | 0            | 0        | 0                 | 0              | 0            | 0        | 0       |
| Lithuania               | 238  | 213                | 0       | 0            | 0  | 0   | 213             |                     |      | 18           | 18       | 0                 | 7              | 0            | 7        | 0       |
| North Macedonia         | 271  | 266                | 0       | 0            | 0  | 0   | 266             | 0                   | 1    | 0            | 1        | 3                 | 1              | 0            | 4        | 0       |
| Poland                  |      |                    |         |              |    |     |                 |                     |      |              |          |                   |                |              |          |         |
| Portugal #              | 2245 |                    |         | 1991         |    |     | 1991            |                     |      | 233          | 233      |                   |                | 21           | 21       | 0       |
| Russia                  |      |                    |         |              |    |     |                 |                     |      |              |          |                   |                |              |          |         |
| Slovakia †              | 382  | 82                 | 0       | 0            | 0  | 289 | 371             | 6                   | 5    | 0            | 11       |                   |                |              |          | 0       |
| Spain                   |      |                    |         |              |    |     |                 |                     |      |              |          |                   |                |              |          |         |
| Turkey                  |      |                    |         |              |    |     |                 |                     |      |              |          |                   |                |              |          |         |

*Abbreviations used: HD: haemodialysis; Unkn: unknown; HF: haemofiltration; HDF: haemodiafiltration; APD: automated peritoneal dialysis; CAPD: continuous ambulatory peritoneal dialysis; PD: peritoneal dialysis; Tx: transplant*  
*When cells are left empty, the data are unavailable*

*\* Patients younger than 18 years of age are not reported*

*† Data include dialysis patients only*

*# Only pre-emptive transplantations (at day 1) are included*

Table C.3.7  
Incidence per million population by treatment modality, unadjusted  
at day 91

|                         | All   | Haemodialysis      |         |              |     |      |                 | Peritoneal dialysis |      |              |          | Kidney transplant |                |              |          | Missing |
|-------------------------|-------|--------------------|---------|--------------|-----|------|-----------------|---------------------|------|--------------|----------|-------------------|----------------|--------------|----------|---------|
|                         |       | HD hospital/centre | HD home | HD type Unkn | HF  | HDF  | Total HD/HF/HDF | APD                 | CAPD | PD type Unkn | Total PD | Living donor      | Deceased donor | Tx type Unkn | Total Tx |         |
|                         | Pmp   | Pmp                | Pmp     | Pmp          | Pmp | Pmp  | Pmp             | Pmp                 | Pmp  | Pmp          | Pmp      | Pmp               | Pmp            | Pmp          | Pmp      | Pmp     |
| Albania                 | 116.8 | 106.1              | 0       | 0            | 0   | 0    | 106.1           | 0                   | 4.6  | 0            | 4.6      | 1.4               | 0              | 0            | 1.4      | 4.6     |
| Belarus *               | 58.5  | 46.9               | 0       | 0            | 0   | 6.2  | 53.1            | 0.6                 | 3.1  | 0            | 3.7      | 0                 | 1.7            | 0            | 1.7      | 0       |
| Croatia †               | 92.7  | 75.9               | 0       | 0            | 0   | 11.3 | 87.2            |                     |      | 5.5          | 5.5      |                   |                |              |          | 0       |
| Cyprus                  | 264.6 | 244.4              | 0       | 0            | 0   | 0    | 244.4           | 0                   | 19.1 | 0            | 19.1     | 0                 | 1.1            | 0            | 1.1      | 0       |
| Czech Republic          |       |                    |         |              |     |      |                 |                     |      |              |          |                   |                |              |          |         |
| Hungary                 |       |                    |         |              |     |      |                 |                     |      |              |          |                   |                |              |          |         |
| Israel                  | 183.1 | 145.6              | 0       | 0            | 0   | 5.4  | 151.1           | 8.1                 | 15.8 | 0.1          | 24.1     | 7.2               | 0.3            | 0.4          | 7.9      | 0       |
| Italy (8 of 20 regions) | 140.0 | 82.5               | 0.4     | 20.5         | 1.0 | 9.7  | 114.1           | 9.5                 | 12.7 | 0            | 22.2     | 1.0               | 2.7            | 0            | 3.7      | 0       |
| Kosovo                  | 95.4  | 95.4               | 0       | 0            | 0   | 0    | 95.4            | 0                   | 0    | 0            | 0        | 0                 | 0              | 0            | 0        | 0       |
| Lithuania               | 85.2  | 76.2               | 0       | 0            | 0   | 0    | 76.2            |                     |      | 6.4          | 6.4      | 0                 | 2.5            | 0            | 2.5      | 0       |
| North Macedonia         | 131.0 | 128.6              | 0       | 0            | 0   | 0    | 128.6           | 0                   | 0.5  | 0            | 0.5      | 1.5               | 0.5            | 0            | 1.9      | 0       |
| Poland                  |       |                    |         |              |     |      |                 |                     |      |              |          |                   |                |              |          |         |
| Portugal #              | 218.0 |                    |         | 193.3        |     |      | 193.3           |                     |      | 22.6         | 22.6     |                   |                | 2.0          | 2.0      | 0       |
| Russia                  |       |                    |         |              |     |      |                 |                     |      |              |          |                   |                |              |          |         |
| Slovakia †              | 88.3  | 19.0               | 0       | 0            | 0   | 66.8 | 85.8            | 1.4                 | 1.2  | 0            | 2.5      |                   |                |              |          | 0       |
| Spain                   |       |                    |         |              |     |      |                 |                     |      |              |          |                   |                |              |          |         |
| Turkey                  |       |                    |         |              |     |      |                 |                     |      |              |          |                   |                |              |          |         |

Abbreviations used: HD: haemodialysis; Unkn: unknown; HF: haemofiltration; HDF: haemodiafiltration; APD: automated peritoneal dialysis; CAPD: continuous ambulatory peritoneal dialysis; PD: peritoneal dialysis; Tx: transplant

Categories may not add up because of rounding off

When cells are left empty, the data are unavailable

\* Patients younger than 18 years of age are not reported

† Data include dialysis patients only

# Only pre-emptive transplantations (at day 1) are included



Table C.3.8  
**Treatment modality distribution, unadjusted**  
*at day 91*

|                         | All | Haemodialysis      |         |              |     |      |                 | Peritoneal dialysis |      |              |          | Kidney transplant |                |              |          | Missing |
|-------------------------|-----|--------------------|---------|--------------|-----|------|-----------------|---------------------|------|--------------|----------|-------------------|----------------|--------------|----------|---------|
|                         |     | HD hospital/centre | HD home | HD type Unkn | HF  | HDF  | Total HD/HF/HDF | APD                 | CAPD | PD type Unkn | Total PD | Living donor      | Deceased donor | Tx type Unkn | Total Tx |         |
|                         |     | %                  | %       | %            | %   | %    | %               | %                   | %    | %            | %        | %                 | %              | %            | %        |         |
| Albania                 | 100 | 90.9               | 0       | 0            | 0   | 0    | 90.9            | 0                   | 4.0  | 0            | 4.0      | 1.2               | 0              | 0            | 1.2      | 4.0     |
| Belarus *               | 100 | 80.1               | 0       | 0            | 0   | 10.6 | 90.7            | 1.1                 | 5.3  | 0            | 6.4      | 0                 | 2.9            | 0            | 2.9      | 0       |
| Croatia †               | 100 | 81.8               | 0       | 0            | 0   | 12.2 | 94.0            |                     |      | 6.0          | 6.0      |                   |                |              |          | 0       |
| Cyprus                  | 100 | 92.3               | 0       | 0            | 0   | 0    | 92.3            | 0                   | 7.2  | 0            | 7.2      | 0                 | 0.4            | 0            | 0.4      | 0       |
| Czech Republic          |     |                    |         |              |     |      |                 |                     |      |              |          |                   |                |              |          |         |
| Hungary                 |     |                    |         |              |     |      |                 |                     |      |              |          |                   |                |              |          |         |
| Israel                  | 100 | 79.5               | 0       | 0            | 0   | 3.0  | 82.5            | 4.4                 | 8.7  | 0.1          | 13.2     | 3.9               | 0.2            | 0.2          | 4.3      | 0       |
| Italy (8 of 20 regions) | 100 | 59.0               | 0.3     | 14.7         | 0.7 | 6.9  | 81.5            | 6.8                 | 9.1  | 0            | 15.8     | 0.7               | 1.9            | 0            | 2.6      | 0       |
| Kosovo                  | 100 | 100                | 0       | 0            | 0   | 0    | 100             | 0                   | 0    | 0            | 0        | 0                 | 0              | 0            | 0        | 0       |
| Lithuania               | 100 | 89.5               | 0       | 0            | 0   | 0    | 89.5            |                     |      | 7.6          | 7.6      | 0                 | 2.9            | 0            | 2.9      | 0       |
| North Macedonia         | 100 | 98.2               | 0       | 0            | 0   | 0    | 98.2            | 0                   | 0.4  | 0            | 0.4      | 1.1               | 0.4            | 0            | 1.5      | 0       |
| Poland                  |     |                    |         |              |     |      |                 |                     |      |              |          |                   |                |              |          |         |
| Portugal #              | 100 |                    |         | 88.7         |     |      | 88.7            |                     |      | 10.4         | 10.4     |                   |                | 0.9          | 0.9      | 0       |
| Russia                  |     |                    |         |              |     |      |                 |                     |      |              |          |                   |                |              |          |         |
| Slovakia †              | 100 | 21.5               | 0       | 0            | 0   | 75.7 | 97.1            | 1.6                 | 1.3  | 0            | 2.9      |                   |                |              |          | 0       |
| Spain                   |     |                    |         |              |     |      |                 |                     |      |              |          |                   |                |              |          |         |
| Turkey                  |     |                    |         |              |     |      |                 |                     |      |              |          |                   |                |              |          |         |

Abbreviations used: HD: haemodialysis; Unkn: unknown; HF: haemofiltration; HDF: haemodiafiltration; APD: automated peritoneal dialysis; CAPD: continuous ambulatory peritoneal dialysis; PD: peritoneal dialysis; Tx: transplant

Categories may not add up because of rounding off

When cells are left empty, the data are unavailable

\* Patients younger than 18 years of age are not reported

† Data include dialysis patients only

# Only pre-emptive transplantations (at day 1) are included

Table C.4.1  
**Prevalent counts and percentages by age and sex**  
*prevalent patients on December 31*

|                         | All      |          |          | 0-19 |   |     |   |       |   | 20-44 |    |      |    |       |    | 45-64 |    |       |    |       |    | 65-74 |    |       |    |       |    | 75+   |    |      |    |      |    |
|-------------------------|----------|----------|----------|------|---|-----|---|-------|---|-------|----|------|----|-------|----|-------|----|-------|----|-------|----|-------|----|-------|----|-------|----|-------|----|------|----|------|----|
|                         | All      | Men      | Women    | All  |   | Men |   | Women |   | All   |    | Men  |    | Women |    | All   |    | Men   |    | Women |    | All   |    | Men   |    | Women |    |       |    |      |    |      |    |
|                         | N (100%) | N (100%) | N (100%) | N    | % | N   | % | N     | % | N     | %  | N    | %  | N     | %  | N     | %  | N     | %  | N     | %  | N     | %  | N     | %  | N     | %  |       |    |      |    |      |    |
| Albania                 | 1664     | 1076     | 588      | 30   | 2 | 19  | 2 | 11    | 2 | 460   | 28 | 312  | 29 | 148   | 25 | 681   | 41 | 420   | 39 | 261   | 44 | 356   | 21 | 234   | 22 | 122   | 21 | 137   | 8  | 91   | 8  | 46   | 8  |
| Belarus *               | 3881     | 2148     | 1733     | 36   | 1 | 20  | 1 | 16    | 1 | 1137  | 29 | 644  | 30 | 493   | 28 | 1781  | 46 | 1001  | 47 | 780   | 45 | 746   | 19 | 384   | 18 | 362   | 21 | 181   | 5  | 99   | 5  | 82   | 5  |
| Croatia †               | 2028     | 1194     | 834      | 1    | 0 | 0   | 0 | 1     | 0 | 204   | 10 | 113  | 9  | 91    | 11 | 586   | 29 | 376   | 31 | 210   | 25 | 684   | 34 | 404   | 34 | 280   | 34 | 553   | 27 | 301  | 25 | 252  | 30 |
| Cyprus                  |          |          |          |      |   |     |   |       |   |       |    |      |    |       |    |       |    |       |    |       |    |       |    |       |    |       |    |       |    |      |    |      |    |
| Czech Republic          | 11287    |          |          |      |   |     |   |       |   |       |    |      |    |       |    |       |    |       |    |       |    |       |    |       |    |       |    |       |    |      |    |      |    |
| Hungary                 | 9651     |          |          |      |   |     |   |       |   |       |    |      |    |       |    |       |    |       |    |       |    |       |    |       |    |       |    |       |    |      |    |      |    |
| Israel †                | 6916     | 4337     | 2579     | 47   | 1 | 24  | 1 | 23    | 1 | 460   | 7  | 297  | 7  | 163   | 6  | 2065  | 30 | 1349  | 31 | 716   | 28 | 2099  | 30 | 1310  | 30 | 789   | 31 | 2245  | 32 | 1357 | 31 | 888  | 34 |
| Italy (8 of 20 regions) | 28127    | 17851    | 10276    | 330  | 1 | 190 | 1 | 140   | 1 | 3536  | 13 | 2226 | 12 | 1310  | 13 | 10188 | 36 | 6491  | 36 | 3697  | 36 | 6882  | 24 | 4424  | 25 | 2458  | 24 | 7191  | 26 | 4520 | 25 | 2671 | 26 |
| Kosovo                  | 784      | 409      | 375      | 0    | 0 | 0   | 0 | 0     | 0 | 87    | 11 | 53   | 13 | 34    | 9  | 382   | 49 | 198   | 48 | 184   | 49 | 232   | 30 | 116   | 28 | 116   | 31 | 83    | 11 | 42   | 10 | 41   | 11 |
| Lithuania               | 2417     |          |          |      |   |     |   |       |   |       |    |      |    |       |    |       |    |       |    |       |    |       |    |       |    |       |    |       |    |      |    |      |    |
| North Macedonia         | 1762     | 1085     | 677      | 10   | 1 | 5   | 0 | 5     | 1 | 238   | 14 | 151  | 14 | 87    | 13 | 816   | 46 | 526   | 48 | 290   | 43 | 448   | 25 | 253   | 23 | 195   | 29 | 250   | 14 | 150  | 14 | 100  | 15 |
| Poland †                | 19647    | 7927     | 11720    | 39   | 0 |     |   |       |   | 2180  | 11 |      |    |       |    | 6325  | 32 |       |    |       |    | 6304  | 32 |       |    |       |    | 4799  | 24 |      |    |      |    |
| Portugal                | 20713    | 12623    | 8090     |      |   |     |   |       |   |       |    |      |    |       |    |       |    |       |    |       |    |       |    |       |    |       |    |       |    |      |    |      |    |
| Russia                  | 61164    | 32715    | 28449    | 1210 | 2 | 670 | 2 | 540   | 2 | 13740 | 22 | 8161 | 25 | 5579  | 20 | 27671 | 45 | 14962 | 46 | 12709 | 45 | 14365 | 23 | 7004  | 21 | 7361  | 26 | 4178  | 7  | 1918 | 6  | 2260 | 8  |
| Slovakia †              | 3105     | 1912     | 1193     | 6    | 0 | 5   | 0 | 1     | 0 | 302   | 10 | 190  | 10 | 112   | 9  | 1050  | 34 | 691   | 36 | 359   | 30 | 1042  | 34 | 659   | 34 | 383   | 32 | 705   | 23 | 367  | 19 | 338  | 28 |
| Spain §                 | 64621    | 40982    | 23639    | 354  | 1 | 228 | 1 | 126   | 1 | 8653  | 13 | 5314 | 13 | 3339  | 14 | 24959 | 39 | 15878 | 39 | 9081  | 38 | 15729 | 24 | 10266 | 25 | 5463  | 23 | 14926 | 23 | 9296 | 23 | 5630 | 24 |
| Turkey                  | 83350    |          |          |      |   |     |   |       |   |       |    |      |    |       |    |       |    |       |    |       |    |       |    |       |    |       |    |       |    |      |    |      |    |

Categories may not add up because of missing values or rounding off

When cells are left empty, the data are unavailable

\* Patients younger than 18 years of age are not reported

† Data include dialysis patients only

§ Data presented in column 0-19 refer to patients aged 0-14 years and data presented in column 20-44 refer to patients aged 15-44 years

Table C.4.2  
**Prevalence per million (age-related) population by age and sex, unadjusted**  
*prevalent patients on December 31*

|                         | All    |        |        | 0-19  |       |       | 20-44 |       |       | 45-64  |        |        | 65-74  |        |        | 75+    |        |        |
|-------------------------|--------|--------|--------|-------|-------|-------|-------|-------|-------|--------|--------|--------|--------|--------|--------|--------|--------|--------|
|                         | All    | Men    | Women  | All   | Men   | Women | All   | Men   | Women | All    | Men    | Women  | All    | Men    | Women  | All    | Men    | Women  |
|                         | Pmp    | Pmp    | Pmp    | Pmarp  | Pmarp  | Pmarp  | Pmarp  | Pmarp  | Pmarp  | Pmarp  | Pmarp  | Pmarp  |
| Albania                 | 590.6  | 765.1  | 416.7  | 44.8  | 55.6  | 33.6  | 464.8 | 621.6 | 303.4 | 917.1  | 1160.9 | 685.5  | 1426.5 | 1931.3 | 950.2  | 823.9  | 1144.0 | 530.4  |
| Belarus *               | 413.8  | 495.4  | 343.6  | 17.6  | 19.0  | 16.0  | 352.0 | 402.5 | 302.4 | 676.5  | 836.0  | 543.5  | 834.2  | 1130.6 | 652.7  | 316.4  | 679.5  | 192.3  |
| Croatia †               | 589.4  | 713.9  | 471.7  | 1.5   | 0     | 3.1   | 186.9 | 200.8 | 172.2 | 612.2  | 799.8  | 431.1  | 1674.3 | 2193.1 | 1248.2 | 1703.0 | 2577.6 | 1211.8 |
| Cyprus                  |        |        |        |       |       |       |       |       |       |        |        |        |        |        |        |        |        |        |
| Czech Republic          | 1076.2 |        |        |       |       |       |       |       |       |        |        |        |        |        |        |        |        |        |
| Hungary                 | 997.8  |        |        |       |       |       |       |       |       |        |        |        |        |        |        |        |        |        |
| Israel †                | 750.5  | 947.9  | 555.9  | 14.2  | 14.1  | 14.3  | 151.0 | 194.1 | 107.6 | 1183.0 | 1585.4 | 800.3  | 3157.3 | 4240.9 | 2216.9 | 5033.6 | 7284.0 | 3419.3 |
| Italy (8 of 20 regions) | 1310.0 | 1706.9 | 933.1  | 86.5  | 96.6  | 75.7  | 573.5 | 711.1 | 431.6 | 1567.2 | 2037.6 | 1115.2 | 2813.2 | 3830.6 | 1903.3 | 2827.8 | 4426.5 | 1755.1 |
| Kosovo                  | 464.6  | 481.4  | 447.5  | 0     | 0     | 0     | 134.6 | 163.9 | 105.3 | 1338.6 | 1407.5 | 1271.6 | 3071.7 | 3175.5 | 2974.6 | 2198.4 | 2557.2 | 1922.1 |
| Lithuania               | 865.0  |        |        |       |       |       |       |       |       |        |        |        |        |        |        |        |        |        |
| North Macedonia         | 851.8  | 1048.1 | 655.1  | 22.3  | 21.6  | 23.1  | 313.9 | 388.3 | 235.6 | 1465.4 | 1890.8 | 1040.7 | 2268.7 | 2762.5 | 1841.7 | 2319.7 | 3346.6 | 1588.5 |
| Poland †                | 512.3  | 427.3  | 591.8  | 5.2   |       |       | 161.4 |       |       | 630.9  |        |        | 1404.7 |        |        | 1686.8 |        |        |
| Portugal                | 2011.3 | 2598.0 | 1487.3 |       |       |       |       |       |       |        |        |        |        |        |        |        |        |        |
| Russia                  | 427.0  | 492.0  | 370.6  | 37.2  | 40.2  | 34.1  | 275.8 | 327.4 | 224.2 | 723.5  | 863.7  | 607.3  | 997.4  | 1310.7 | 812.6  | 504.1  | 858.3  | 373.3  |
| Slovakia †              | 718.1  | 905.4  | 539.3  | 6.7   | 10.9  | 2.3   | 197.8 | 242.7 | 150.6 | 902.1  | 1202.2 | 609.3  | 2258.2 | 3266.4 | 1474.9 | 2547.5 | 3929.3 | 1843.6 |
| Spain §                 | 1361.9 | 1762.2 | 977.0  | 38.4  | 48.1  | 28.2  | 570.4 | 693.4 | 444.8 | 1803.2 | 2314.8 | 1300.6 | 3392.4 | 4721.6 | 2218.7 | 3257.6 | 5126.6 | 2033.5 |
| Turkey                  | 996.8  |        |        |       |       |       |       |       |       |        |        |        |        |        |        |        |        |        |

*When cells are left empty, the data are unavailable*

*\* Patients younger than 18 years of age are not reported*

*† Data include dialysis patients only*

*§ Data presented in column 0-19 refer to patients aged 0-14 years and data presented in column 20-44 refer to patients aged 15-44 years*

Table C.4.3  
**Sex, mean age, and median age**  
*prevalent patients on December 31*

|                         | All |              |      |                |      |      | Men  |              |      |                |      |      | Women |              |      |                |      |      |
|-------------------------|-----|--------------|------|----------------|------|------|------|--------------|------|----------------|------|------|-------|--------------|------|----------------|------|------|
|                         | %   | Mean (years) | SD   | Median (years) | P25  | P75  | %    | Mean (years) | SD   | Median (years) | P25  | P75  | %     | Mean (years) | SD   | Median (years) | P25  | P75  |
| Albania                 | 100 | 52.2         | 18.2 | 51.0           | 36.0 | 69.0 | 64.7 | 53.3         | 18.4 | 56.0           | 36.0 | 68.0 | 35.3  | 50.0         | 17.5 | 46.0           | 38.0 | 69.0 |
| Belarus *               | 100 |              |      |                |      |      | 55.3 |              |      |                |      |      | 44.7  |              |      |                |      |      |
| Croatia †               | 100 | 66.4         | 15.0 | 69.0           | 59.0 | 78.0 | 58.9 | 65.8         | 14.7 | 68.5           | 59.0 | 77.0 | 41.1  | 67.4         | 15.6 | 70.0           | 62.0 | 78.0 |
| Cyprus                  |     |              |      |                |      |      |      |              |      |                |      |      |       |              |      |                |      |      |
| Czech Republic          |     |              |      |                |      |      |      |              |      |                |      |      |       |              |      |                |      |      |
| Hungary                 |     |              |      |                |      |      |      |              |      |                |      |      |       |              |      |                |      |      |
| Israel †                | 100 | 67.4         | 14.4 | 69.3           | 59.7 | 77.5 | 62.7 | 67.1         | 14.3 | 69.0           | 59.3 | 77.0 | 37.3  | 67.8         | 14.5 | 70.0           | 60.1 | 78.0 |
| Italy (8 of 20 regions) | 100 | 63.1         | 16.4 | 65.0           | 52.7 | 75.3 | 63.5 | 63.1         | 16.3 | 65.0           | 52.9 | 75.2 | 36.5  | 63.1         | 16.7 | 65.0           | 52.4 | 75.5 |
| Kosovo                  | 100 | 60.2         | 12.4 | 62.0           | 52.0 | 69.0 | 52.2 | 59.5         | 12.7 | 62.0           | 51.5 | 69.0 | 47.8  | 61.0         | 12.1 | 62.0           | 54.0 | 70.0 |
| Lithuania               |     |              |      |                |      |      |      |              |      |                |      |      |       |              |      |                |      |      |
| North Macedonia         | 100 | 59.8         | 14.0 | 61.0           | 52.0 | 70.0 | 61.6 | 59.4         | 13.9 | 61.0           | 51.0 | 69.0 | 38.4  | 60.4         | 14.2 | 62.0           | 52.0 | 71.0 |
| Poland †                | 100 |              |      |                |      |      | 40.3 |              |      |                |      |      | 59.7  |              |      |                |      |      |
| Portugal                | 100 | 67.7         |      |                |      |      | 60.9 |              |      |                |      |      | 39.1  |              |      |                |      |      |
| Russia                  | 100 |              |      |                |      |      | 53.5 |              |      |                |      |      | 46.5  |              |      |                |      |      |
| Slovakia †              | 100 | 64.0         | 13.8 | 66.0           | 56.0 | 74.0 | 61.6 | 63.1         | 13.7 | 65.0           | 55.0 | 72.0 | 38.4  | 65.6         | 13.7 | 68.0           | 58.0 | 75.0 |
| Spain                   | 100 | 60.4         | 15.6 | 63.7           | 50.7 | 74.2 | 63.4 | 60.5         | 15.5 | 63.8           | 50.5 | 73.8 | 36.6  | 60.2         | 15.9 | 63.4           | 50.4 | 74.5 |
| Turkey                  |     |              |      |                |      |      |      |              |      |                |      |      |       |              |      |                |      |      |

*Categories may not add up because of missing values or rounding off*

*When cells are left empty, the data are unavailable*

*\* Patients younger than 18 years of age are not reported*

*† Data include dialysis patients only*

Table C.4.4  
**Prevalence per million population, adjusted**  
*prevalent patients on December 31, adjusted for age and sex*

|                         | All    | Men    | Women |
|-------------------------|--------|--------|-------|
|                         | Pmp    | Pmp    | Pmp   |
| Albania                 | 640.6  | 825.3  | 464.4 |
| Belarus                 |        |        |       |
| Croatia †               | 545.6  | 673.1  | 424.1 |
| Cyprus                  |        |        |       |
| Czech Republic          |        |        |       |
| Hungary                 |        |        |       |
| Israel †                | 1141.5 | 1436.1 | 860.7 |
| Italy (8 of 20 regions) | 1159.2 | 1492.9 | 841.0 |
| Kosovo                  | 924.6  | 948.1  | 902.2 |
| Lithuania               |        |        |       |
| North Macedonia         | 926.4  | 1151.0 | 712.2 |
| Poland                  |        |        |       |
| Portugal                |        |        |       |
| Russia                  |        |        |       |
| Slovakia †              | 772.0  | 998.7  | 555.9 |
| Spain                   |        |        |       |
| Turkey                  |        |        |       |

*When cells are left empty, the data are unavailable*

*† Data include dialysis patients only*

Table C.4.5  
**Prevalence per million population and percentages by primary renal disease, unadjusted**  
*prevalent patients on December 31*

|                         | All    |     | GN    |      | PN    |      | PKD   |      | DM     |     |        |      |       |      | HT    |      | RVD  |     | Misc  |      | Unkn  |      | Missing |      |
|-------------------------|--------|-----|-------|------|-------|------|-------|------|--------|-----|--------|------|-------|------|-------|------|------|-----|-------|------|-------|------|---------|------|
|                         | Pmp    | %   | Pmp   | %    | Pmp   | %    | Pmp   | %    | Type 1 |     | Type 2 |      | Both  |      | Pmp   | %    | Pmp  | %   | Pmp   | %    | Pmp   | %    | Pmp     | %    |
|                         |        |     |       |      |       |      |       |      | Pmp    | %   | Pmp    | %    | Pmp   | %    |       |      |      |     |       |      |       |      |         |      |
| Albania                 | 590.6  | 100 | 99.7  | 16.9 | 131.7 | 22.3 | 45.8  | 7.8  | 12.4   | 2.1 | 113.9  | 19.3 | 126.4 | 21.4 | 59.6  | 10.1 | 13.8 | 2.3 | 63.2  | 10.7 | 44.7  | 7.6  | 5.7     | 1.0  |
| Belarus *               | 413.8  | 100 | 171.2 | 41.4 | 29.4  | 7.1  | 39.4  | 9.5  | 22.6   | 5.5 | 32.2   | 7.8  | 54.8  | 13.2 | 33.0  | 8.0  | 12.3 | 3.0 | 73.5  | 17.8 | 0.1   | 0    | 0       | 0    |
| Croatia †               | 589.4  | 100 | 111.3 | 18.9 | 36.6  | 6.2  | 53.8  | 9.1  | 9.3    | 1.6 | 138.9  | 23.6 | 148.2 | 25.1 | 115.4 | 19.6 | 19.5 | 3.3 | 59.6  | 10.1 | 29.6  | 5.0  | 15.4    | 2.6  |
| Cyprus                  |        |     |       |      |       |      |       |      |        |     |        |      |       |      |       |      |      |     |       |      |       |      |         |      |
| Czech Republic          |        |     |       |      |       |      |       |      |        |     |        |      |       |      |       |      |      |     |       |      |       |      |         |      |
| Hungary                 |        |     |       |      |       |      |       |      |        |     |        |      |       |      |       |      |      |     |       |      |       |      |         |      |
| Israel †                | 750.5  | 100 | 62.7  | 8.4  | 17.5  | 2.3  | 26.8  | 3.6  | 39.7   | 5.3 | 313.4  | 41.8 | 353.1 | 47.1 | 86.1  | 11.5 | 9.8  | 1.3 | 85.5  | 11.4 | 102.3 | 13.6 | 6.7     | 0.9  |
| Italy (8 of 20 regions) | 1310.0 | 100 | 255.2 | 19.5 | 86.0  | 6.6  | 121.8 | 9.3  |        |     |        |      | 136.5 | 10.4 | 139.7 | 10.7 | 33.6 | 2.6 | 116.6 | 8.9  | 282.4 | 21.6 | 138.3   | 10.6 |
| Kosovo                  | 464.6  | 100 | 16.0  | 3.4  | 160.6 | 34.6 | 26.7  | 5.7  | 11.9   | 2.6 | 125.0  | 26.9 | 136.9 | 29.5 | 52.1  | 11.2 | 39.1 | 8.4 | 17.8  | 3.8  | 15.4  | 3.3  | 0       | 0    |
| Lithuania               |        |     |       |      |       |      |       |      |        |     |        |      |       |      |       |      |      |     |       |      |       |      |         |      |
| North Macedonia         | 851.8  | 100 | 127.1 | 14.9 | 59.9  | 7.0  | 80.2  | 9.4  | 12.1   | 1.4 | 138.7  | 16.3 | 150.8 | 17.7 | 228.7 | 26.8 | 2.9  | 0.3 | 82.7  | 9.7  | 119.4 | 14.0 | 0       | 0    |
| Poland †                | 512.3  | 100 | 78.8  | 15.4 | 35.5  | 6.9  | 38.7  | 7.5  | 25.4   | 5.0 | 116.6  | 22.8 | 142.1 | 27.7 | 70.7  | 13.8 | 24.0 | 4.7 | 72.5  | 14.2 | 50.0  | 9.8  | 0       | 0    |
| Portugal + & ‡          | 2011.3 | 100 | 178.7 | 8.9  |       |      | 86.7  | 4.3  |        |     |        |      | 357.7 | 17.8 | 165.6 | 8.2  |      |     | 268.7 | 13.4 | 232.1 | 11.5 | 5.5     | 0.3  |
| Russia                  | 427.0  | 100 | 138.1 | 32.3 | 51.6  | 12.1 | 48.4  | 11.3 | 24.2   | 5.7 | 53.3   | 12.5 | 77.5  | 18.2 | 46.8  | 11.0 | 8.0  | 1.9 | 56.6  | 13.3 | 0     | 0    | 0       | 0    |
| Slovakia †              | 718.1  | 100 | 91.6  | 12.8 | 63.4  | 8.8  | 29.1  | 4.1  |        |     |        |      | 214.6 | 29.9 | 52.0  | 7.2  | 22.0 | 3.1 | 237.7 | 33.1 | 7.6   | 1.1  | 0       | 0    |
| Spain ¶                 | 1361.9 | 100 | 266.3 | 19.6 | 139.2 | 10.2 | 138.8 | 10.2 |        |     |        |      | 222.5 | 16.3 | 150.6 | 11.1 |      |     | 147.0 | 10.8 | 260.2 | 19.1 | 37.2    | 2.7  |
| Turkey                  | 996.8  | 100 | 6.0   | 0.6  | 0.9   | 0.1  | 4.0   | 0.4  | 3.7    | 0.4 | 27.9   | 2.8  | 31.5  | 3.2  | 24.3  | 2.4  | 0.7  | 0.1 | 10.8  | 1.1  | 12.7  | 1.3  | 905.9   | 90.9 |

Abbreviations used: GN: glomerulonephritis/sclerosis; PN: pyelonephritis; PKD: polycystic kidneys, adult type; DM: diabetes mellitus; HT: hypertension; RVD: renal vascular disease; Misc: miscellaneous; Unkn: unknown

Categories may not add up because of rounding off

When cells are left empty, the data are unavailable

\* Patients younger than 18 years of age are not reported

† Data include dialysis patients only

+ Renal vascular disease is not reported separately, but is included into miscellaneous

& Pyelonephritis is not reported separately, but is included into miscellaneous

‡ Data on primary renal disease are available for dialysis patients only (64.4% of total N=20713)

¶ Renal vascular disease is not reported separately, but is included into hypertension

Table C.4.6  
**Prevalent counts by treatment modality**  
*prevalent patients on December 31*

|                         | All   | Haemodialysis      |         |              |     |      |                 | Peritoneal dialysis |      |              |          | Kidney transplant |                |              |          | Missing |
|-------------------------|-------|--------------------|---------|--------------|-----|------|-----------------|---------------------|------|--------------|----------|-------------------|----------------|--------------|----------|---------|
|                         |       | HD hospital/centre | HD home | HD type Unkn | HF  | HDF  | Total HD/HF/HDF | APD                 | CAPD | PD type Unkn | Total PD | Living donor      | Deceased donor | Tx type Unkn | Total Tx |         |
|                         |       | N                  | N       | N            | N   | N    | N               | N                   | N    | N            | N        | N                 | N              | N            | N        |         |
| Albania                 | 1664  | 1301               | 0       | 0            | 0   | 0    | 1301            | 0                   | 39   | 0            | 39       | 255               | 40             | 9            | 304      | 20      |
| Belarus *               | 3881  | 1481               | 0       | 0            | 10  | 318  | 1809            | 14                  | 153  | 0            | 167      | 89                | 1813           | 3            | 1905     | 0       |
| Croatia †               | 2028  | 1646               | 0       | 0            | 0   | 246  | 1892            |                     |      | 136          | 136      |                   |                |              |          | 0       |
| Cyprus                  |       |                    |         |              |     |      |                 |                     |      |              |          |                   |                |              |          |         |
| Czech Republic          | 11287 | 1384               | 49      | 0            | 0   | 4080 | 5513            |                     |      | 295          | 295      |                   |                | 5479         | 5479     | 0       |
| Hungary                 | 9651  | 5232               | 0       | 0            | 0   | 0    | 5232            | 184                 | 702  | 0            | 886      | 344               | 3189           | 0            | 3533     | 0       |
| Israel †                | 6916  | 5796               | 0       | 0            | 0   | 517  | 6313            | 299                 | 301  | 3            | 603      |                   |                |              |          | 0       |
| Italy (8 of 20 regions) | 28127 | 9758               | 50      | 1422         | 360 | 3466 | 15056           | 1103                | 941  | 1            | 2045     | 872               | 10154          | 0            | 11026    | 0       |
| Kosovo                  | 784   | 676                | 0       | 0            | 0   | 0    | 676             | 0                   | 0    | 0            | 0        | 108               | 0              | 0            | 108      | 0       |
| Lithuania               | 2417  | 1342               | 0       | 0            | 0   | 0    | 1342            | 28                  | 35   | 0            | 63       |                   |                | 1012         | 1012     | 0       |
| North Macedonia         | 1762  | 1513               | 1       | 0            | 0   | 0    | 1514            | 0                   | 17   | 0            | 17       | 208               | 23             | 0            | 231      | 0       |
| Poland †                | 19647 | 18847              | 0       | 0            | 0   | 0    | 18847           |                     |      | 800          | 800      |                   |                |              |          | 0       |
| Portugal                | 20713 |                    |         | 12458        |     |      | 12458           |                     |      | 878          | 878      | 781               | 6596           | 0            | 7377     | 0       |
| Russia                  | 61164 | 44079              | 0       | 0            | 0   | 3833 | 47912           | 345                 | 2309 | 0            | 2654     | 1696              | 7313           | 1589         | 10598    | 0       |
| Slovakia †              | 3105  | 503                | 0       | 0            | 1   | 2534 | 3038            | 44                  | 23   | 0            | 67       |                   |                |              |          | 0       |
| Spain                   | 64621 |                    |         | 26091        |     |      | 26091           |                     |      | 3236         | 3236     |                   |                | 35294        | 35294    | 0       |
| Turkey                  | 83350 | 57920              | 895     | 162          | 5   | 1576 | 60558           | 1106                | 2281 | 0            | 3387     | 0                 | 0              | 19405        | 19405    | 0       |

Abbreviations used: HD: haemodialysis; Unkn: unknown; HF: haemofiltration; HDF: haemodiafiltration; APD: automated peritoneal dialysis; CAPD: continuous ambulatory peritoneal dialysis; PD: peritoneal dialysis; Tx: transplant  
 When cells are left empty, the data are unavailable

\* Patients younger than 18 years of age are not reported

† Data include dialysis patients only

Table C.4.7  
**Prevalence per million population by treatment modality, unadjusted**  
*prevalent patients on December 31*

|                         | All    | Haemodialysis             |            |                    |      |       |                        | Peritoneal dialysis |      |                    |             | Kidney transplant |                   |                    |             | Missing |
|-------------------------|--------|---------------------------|------------|--------------------|------|-------|------------------------|---------------------|------|--------------------|-------------|-------------------|-------------------|--------------------|-------------|---------|
|                         |        | HD<br>hospital/<br>centre | HD<br>home | HD<br>type<br>Unkn | HF   | HDF   | Total<br>HD/<br>HF/HDF | APD                 | CAPD | PD<br>type<br>Unkn | Total<br>PD | Living<br>donor   | Deceased<br>donor | Tx<br>type<br>Unkn | Total<br>Tx |         |
|                         | Pmp    | Pmp                       | Pmp        | Pmp                | Pmp  | Pmp   | Pmp                    | Pmp                 | Pmp  | Pmp                | Pmp         | Pmp               | Pmp               | Pmp                | Pmp         | Pmp     |
| Albania                 | 590.6  | 461.8                     | 0          | 0                  | 0    | 0     | 461.8                  | 0                   | 13.8 | 0                  | 13.8        | 90.5              | 14.2              | 3.2                | 107.9       | 7.1     |
| Belarus *               | 413.8  | 157.9                     | 0          | 0                  | 1.1  | 33.9  | 192.9                  | 1.5                 | 16.3 | 0                  | 17.8        | 9.5               | 193.3             | 0.3                | 203.1       | 0       |
| Croatia †               | 589.4  | 478.4                     | 0          | 0                  | 0    | 71.5  | 549.9                  |                     |      | 39.5               | 39.5        |                   |                   |                    |             | 0       |
| Cyprus                  |        |                           |            |                    |      |       |                        |                     |      |                    |             |                   |                   |                    |             |         |
| Czech Republic          | 1076.2 | 132.0                     | 4.7        | 0                  | 0    | 389.0 | 525.7                  |                     |      | 28.1               | 28.1        |                   |                   | 522.4              | 522.4       | 0       |
| Hungary                 | 997.8  | 541.0                     | 0          | 0                  | 0    | 0     | 541.0                  | 19.0                | 72.6 | 0                  | 91.6        | 35.6              | 329.7             | 0                  | 365.3       | 0       |
| Israel †                | 750.5  | 629.0                     | 0          | 0                  | 0    | 56.1  | 685.1                  | 32.4                | 32.7 | 0.3                | 65.4        |                   |                   |                    |             | 0       |
| Italy (8 of 20 regions) | 1310.0 | 454.5                     | 2.3        | 66.2               | 16.8 | 161.4 | 701.2                  | 51.4                | 43.8 | 0                  | 95.2        | 40.6              | 472.9             | 0                  | 513.5       | 0       |
| Kosovo                  | 464.6  | 400.6                     | 0          | 0                  | 0    | 0     | 400.6                  | 0                   | 0    | 0                  | 0           | 64.0              | 0                 | 0                  | 64.0        | 0       |
| Lithuania               | 865.0  | 480.3                     | 0          | 0                  | 0    | 0     | 480.3                  | 10.0                | 12.5 | 0                  | 22.5        |                   |                   | 362.2              | 362.2       | 0       |
| North Macedonia         | 851.8  | 731.4                     | 0.5        | 0                  | 0    | 0     | 731.9                  | 0                   | 8.2  | 0                  | 8.2         | 100.5             | 11.1              | 0                  | 111.7       | 0       |
| Poland †                | 512.3  | 491.4                     | 0          | 0                  | 0    | 0     | 491.4                  |                     |      | 20.9               | 20.9        |                   |                   |                    |             | 0       |
| Portugal                | 2011.3 |                           |            | 1209.7             |      |       | 1209.7                 |                     |      | 85.3               | 85.3        | 75.8              | 640.5             | 0                  | 716.3       | 0       |
| Russia                  | 427.0  | 307.7                     | 0          | 0                  | 0    | 26.8  | 334.5                  | 2.4                 | 16.1 | 0                  | 18.5        | 11.8              | 51.1              | 11.1               | 74.0        | 0       |
| Slovakia †              | 718.1  | 116.3                     | 0          | 0                  | 0.2  | 586.0 | 702.6                  | 10.2                | 5.3  | 0                  | 15.5        |                   |                   |                    |             | 0       |
| Spain                   | 1361.9 |                           |            | 549.9              |      |       | 549.9                  |                     |      | 68.2               | 68.2        |                   |                   | 743.8              | 743.8       | 0       |
| Turkey                  | 996.8  | 692.7                     | 10.7       | 1.9                | 0.1  | 18.8  | 724.3                  | 13.2                | 27.3 | 0                  | 40.5        | 0                 | 0                 | 232.1              | 232.1       | 0       |

Abbreviations used: HD: haemodialysis; Unkn: unknown; HF: haemofiltration; HDF: haemodiafiltration; APD: automated peritoneal dialysis; CAPD: continuous ambulatory peritoneal dialysis; PD: peritoneal dialysis; Tx: transplant  
 Categories may not add up because of rounding off

When cells are left empty, the data are unavailable

\* Patients younger than 18 years of age are not reported

† Data include dialysis patients only



Table C.4.8  
**Treatment modality distribution, unadjusted**  
*prevalent patients on December 31*

|                         | All | Haemodialysis      |         |              |     |      |                 | Peritoneal dialysis |      |              |          | Kidney transplant |                |              |          | Missing |
|-------------------------|-----|--------------------|---------|--------------|-----|------|-----------------|---------------------|------|--------------|----------|-------------------|----------------|--------------|----------|---------|
|                         |     | HD hospital/centre | HD home | HD type Unkn | HF  | HDF  | Total HD/HF/HDF | APD                 | CAPD | PD type Unkn | Total PD | Living donor      | Deceased donor | Tx type Unkn | Total Tx |         |
|                         |     | %                  | %       | %            | %   | %    | %               | %                   | %    | %            | %        | %                 | %              | %            | %        |         |
| Albania                 | 100 | 78.2               | 0       | 0            | 0   | 0    | 78.2            | 0                   | 2.3  | 0            | 2.3      | 15.3              | 2.4            | 0.5          | 18.3     | 1.2     |
| Belarus *               | 100 | 38.2               | 0       | 0            | 0.3 | 8.2  | 46.6            | 0.4                 | 3.9  | 0            | 4.3      | 2.3               | 46.7           | 0.1          | 49.1     | 0       |
| Croatia †               | 100 | 81.2               | 0       | 0            | 0   | 12.1 | 93.3            |                     |      | 6.7          | 6.7      |                   |                |              |          | 0       |
| Cyprus                  |     |                    |         |              |     |      |                 |                     |      |              |          |                   |                |              |          |         |
| Czech Republic          | 100 | 12.3               | 0.4     | 0            | 0   | 36.1 | 48.8            |                     |      | 2.6          | 2.6      |                   |                | 48.5         | 48.5     | 0       |
| Hungary                 | 100 | 54.2               | 0       | 0            | 0   | 0    | 54.2            | 1.9                 | 7.3  | 0            | 9.2      | 3.6               | 33.0           | 0            | 36.6     | 0       |
| Israel †                | 100 | 83.8               | 0       | 0            | 0   | 7.5  | 91.3            | 4.3                 | 4.4  | 0            | 8.7      |                   |                |              |          | 0       |
| Italy (8 of 20 regions) | 100 | 34.7               | 0.2     | 5.1          | 1.3 | 12.3 | 53.5            | 3.9                 | 3.3  | 0            | 7.3      | 3.1               | 36.1           | 0            | 39.2     | 0       |
| Kosovo                  | 100 | 86.2               | 0       | 0            | 0   | 0    | 86.2            | 0                   | 0    | 0            | 0        | 13.8              | 0              | 0            | 13.8     | 0       |
| Lithuania               | 100 | 55.5               | 0       | 0            | 0   | 0    | 55.5            | 1.2                 | 1.4  | 0            | 2.6      |                   |                | 41.9         | 41.9     | 0       |
| North Macedonia         | 100 | 85.9               | 0.1     | 0            | 0   | 0    | 85.9            | 0                   | 1.0  | 0            | 1.0      | 11.8              | 1.3            | 0            | 13.1     | 0       |
| Poland †                | 100 | 95.9               | 0       | 0            | 0   | 0    | 95.9            |                     |      | 4.1          | 4.1      |                   |                |              |          | 0       |
| Portugal                | 100 |                    |         | 60.1         |     |      | 60.1            |                     |      | 4.2          | 4.2      | 3.8               | 31.8           | 0            | 35.6     | 0       |
| Russia                  | 100 | 72.1               | 0       | 0            | 0   | 6.3  | 78.3            | 0.6                 | 3.8  | 0            | 4.3      | 2.8               | 12.0           | 2.6          | 17.3     | 0       |
| Slovakia †              | 100 | 16.2               | 0       | 0            | 0   | 81.6 | 97.8            | 1.4                 | 0.7  | 0            | 2.2      |                   |                |              |          | 0       |
| Spain                   | 100 |                    |         | 40.4         |     |      | 40.4            |                     |      | 5.0          | 5.0      |                   |                | 54.6         | 54.6     | 0       |
| Turkey                  | 100 | 69.5               | 1.1     | 0.2          | 0   | 1.9  | 72.7            | 1.3                 | 2.7  | 0            | 4.1      | 0                 | 0              | 23.3         | 23.3     | 0       |

Abbreviations used: HD: haemodialysis; Unkn: unknown; HF: haemofiltration; HDF: haemodiafiltration; APD: automated peritoneal dialysis; CAPD: continuous ambulatory peritoneal dialysis; PD: peritoneal dialysis; Tx: transplant  
 Categories may not add up because of rounding off

When cells are left empty, the data are unavailable

\* Patients younger than 18 years of age are not reported

† Data include dialysis patients only

Table C.5.1  
Kidney transplant counts and percentages by donor type

|                         | All  |     | Living donor |      |           |      |           |      | Deceased donor |      | Donor type Unkn |      |    |     |
|-------------------------|------|-----|--------------|------|-----------|------|-----------|------|----------------|------|-----------------|------|----|-----|
|                         | N    | %   | Related      |      | Unrelated |      | Type Unkn |      | All            |      | N               | %    | N  | %   |
|                         |      |     | N            | %    | N         | %    | N         | %    | N              | %    |                 |      |    |     |
| Albania                 | 14   | 100 | 14           | 100  | 0         | 0    | 0         | 0    | 14             | 100  | 0               | 0    | 0  | 0   |
| Belarus *               | 242  | 100 | 0            | 0    | 0         | 0    | 1         | 0.4  | 1              | 0.4  | 241             | 99.6 | 0  | 0   |
| Croatia                 | 98   | 100 |              |      |           |      | 3         | 3.1  | 3              | 3.1  | 95              | 96.9 | 0  | 0   |
| Cyprus                  | 13   | 100 | 5            | 38.5 | 2         | 15.4 | 0         | 0    | 7              | 53.8 | 6               | 46.2 | 0  | 0   |
| Czech Republic          | 443  | 100 |              |      |           |      | 28        | 6.3  | 28             | 6.3  | 415             | 93.7 | 0  | 0   |
| Hungary                 | 202  | 100 |              |      |           |      | 30        | 14.9 | 30             | 14.9 | 172             | 85.1 | 0  | 0   |
| Israel                  | 415  | 100 |              |      |           |      | 271       | 65.3 | 271            | 65.3 | 124             | 29.9 | 20 | 4.8 |
| Italy (8 of 20 regions) | 606  | 100 | 37           | 6.1  | 55        | 9.1  | 0         | 0    | 92             | 15.2 | 481             | 79.4 | 33 | 5.4 |
| Kosovo                  | 10   | 100 | 10           | 100  | 0         | 0    | 0         | 0    | 10             | 100  | 0               | 0    | 0  | 0   |
| Lithuania               | 82   | 100 |              |      |           |      | 3         | 3.7  | 3              | 3.7  | 79              | 96.3 | 0  | 0   |
| North Macedonia         | 14   | 100 | 8            | 57.1 | 2         | 14.3 | 0         | 0    | 10             | 71.4 | 4               | 28.6 | 0  | 0   |
| Poland                  | 745  | 100 |              |      |           |      | 31        | 4.2  | 31             | 4.2  | 714             | 95.8 | 0  | 0   |
| Portugal                | 393  | 100 |              |      |           |      | 41        | 10.4 | 41             | 10.4 | 352             | 89.6 | 0  | 0   |
| Russia                  | 1124 | 100 | 157          | 14.0 | 0         | 0    | 0         | 0    | 157            | 14.0 | 967             | 86.0 | 0  | 0   |
| Slovakia +              | 131  | 100 | 15           | 11.5 | 3         | 2.3  | 0         | 0    | 18             | 13.7 | 113             | 86.3 | 0  | 0   |
| Spain □                 | 2702 | 100 | 240          | 8.9  | 19        | 0.7  | 0         | 0    | 259            | 9.6  | 2443            | 90.4 | 0  | 0   |
| Turkey                  | 2499 | 100 | 2042         | 81.7 | 208       | 8.3  | 0         | 0    | 2250           | 90.0 | 249             | 10.0 | 0  | 0   |

Categories may not add up because of rounding off

When cells are left empty, the data are unavailable

\* Patients younger than 18 years of age are not reported

+ Data from: Slovak Centre of Organ Transplantation

□ Data from: Organización Nacional de Trasplantes (ONT)

Table C.5.2  
Kidney transplants per million population by donor type, unadjusted

|                         | All  | Living donor |           |           | Deceased donor | Donor type Unkn |
|-------------------------|------|--------------|-----------|-----------|----------------|-----------------|
|                         |      | Related      | Unrelated | Type Unkn | All            |                 |
|                         | Pmp  | Pmp          | Pmp       | Pmp       | Pmp            | Pmp             |
| Albania                 | 5.0  | 5.0          | 0         | 0         | 5.0            | 0               |
| Belarus *               | 25.8 | 0            | 0         | 0.1       | 0.1            | 25.7            |
| Croatia                 | 28.5 |              |           | 0.9       | 0.9            | 27.6            |
| Cyprus                  | 14.6 | 5.6          | 2.3       | 0         | 7.9            | 6.8             |
| Czech Republic          | 42.2 |              |           | 2.7       | 2.7            | 39.6            |
| Hungary                 | 20.9 |              |           | 3.1       | 3.1            | 17.8            |
| Israel                  | 45.0 |              |           | 29.4      | 29.4           | 13.5            |
| Italy (8 of 20 regions) | 28.2 | 1.7          | 2.6       | 0         | 4.3            | 22.4            |
| Kosovo                  | 5.9  | 5.9          | 0         | 0         | 5.9            | 0               |
| Lithuania               | 29.3 |              |           | 1.1       | 1.1            | 28.3            |
| North Macedonia         | 6.8  | 3.9          | 1.0       | 0         | 4.8            | 1.9             |
| Poland                  | 19.4 |              |           | 0.8       | 0.8            | 18.6            |
| Portugal                | 38.2 |              |           | 4.0       | 4.0            | 34.2            |
| Russia                  | 7.8  | 1.1          | 0         | 0         | 1.1            | 6.8             |
| Slovakia +              | 30.3 | 3.5          | 0.7       | 0         | 4.2            | 26.1            |
| Spain □                 | 56.9 | 5.1          | 0.4       | 0         | 5.5            | 51.5            |
| Turkey                  | 29.9 | 24.4         | 2.5       | 0         | 26.9           | 3.0             |

Categories may not add up because of rounding off

When cells are left empty, the data are unavailable

\* Patients younger than 18 years of age are not reported

+ Data from: Slovak Centre of Organ Transplantation

□ Data from: Organización Nacional de Trasplantes (ONT)

**Section D: Paediatric data reference tables**

## Section D: Paediatric data reference tables

The incidence and prevalence of KRT in paediatric patients are based on data from 26 registries from 15 countries that provided individual patient data on children to the ERA Registry, including Austria, Bosnia and Herzegovina, Denmark, Estonia, Finland, France, Greece, Iceland, Montenegro, Norway, Romania, Serbia, Spain (Andalusia), Spain (Aragon), Spain (Asturias), Spain (Basque country), Spain (Canary Islands), Spain (Catalonia), Spain (Community of Madrid), Spain (Extremadura), Spain (Galicia), Spain (Murcia), Spain (La Rioja), Spain (Valencian Region), Sweden, and the Netherlands. In the analyses the data collected between 2015 and 2020 were used. Since not all countries provided data or had full coverage over the entire period and to allow for comparison across years, data are shown both including and excluding the data from Montenegro, Romania, Serbia, and the Netherlands. The methods applied to the paediatric patient data were similar to those applied to the adult patient data and are described in the Methods section. However, as not all regions in Spain had specialised paediatric centres, non-residents were also included in the incidence and prevalence.

### D1 GENERAL POPULATION AGE DISTRIBUTION

Table D.1.1  
Population covered (in thousands)  
by age and cohort

| Cohort      | All    | 0-4   | 5-9   | 10-14 | 15-19 |
|-------------|--------|-------|-------|-------|-------|
|             | N      | N     | N     | N     | N     |
| 2015        | 33461  | 8127  | 8672  | 8416  | 8246  |
| 2016        | 33518  | 7997  | 8694  | 8485  | 8341  |
| 2017        | 33448  | 7872  | 8638  | 8550  | 8388  |
| 2018        | 33428  | 7764  | 8570  | 8642  | 8452  |
| 2019        | 33469  | 7662  | 8486  | 8764  | 8557  |
| 2020        | 33393  | 7516  | 8387  | 8849  | 8641  |
| 2015 *      | 38971  | 9416  | 10006 | 9833  | 9716  |
| 2016 *      | 40186  | 9564  | 10312 | 10188 | 10123 |
| 2017 *      | 44027  | 10376 | 11229 | 11239 | 11183 |
| 2018 *      | 44193  | 10339 | 11192 | 11373 | 11289 |
| 2019 *      | 44140  | 10228 | 11068 | 11480 | 11364 |
| 2020 *      | 43902  | 10052 | 10921 | 11526 | 11403 |
| 2015-2020 * | 255419 | 59974 | 64729 | 65638 | 65078 |

\* Additionally including data from Montenegro since 2018, Romania since 2017 (coverage from 97% in 2017 to 95% in 2020), Serbia since 2016 (coverage 100% in 2016, 97% in 2017, and 90% in 2018-2020), and the Netherlands (coverage 94% for incidence and 96% for prevalence in 2016, 93% for incidence and 97% for prevalence in 2017, 93% for incidence in 2018 and 2019 and 96% for prevalence in 2018, 2019 and 2020, and 94% for the incidence in 2020, and 100% in all other years)

## D2 INCIDENT PATIENTS ACCEPTED FOR KRT, AT DAY 1

Table D.2.1  
Incident counts by age and cohort  
at day 1

| Cohort      | All  | 0-4 | 5-9 | 10-14 | 15-19 |
|-------------|------|-----|-----|-------|-------|
|             | N    | N   | N   | N     | N     |
| 2015-2016   | 613  | 126 | 77  | 163   | 247   |
| 2017-2018   | 592  | 122 | 89  | 138   | 243   |
| 2019-2020   | 508  | 91  | 78  | 110   | 229   |
| 2015-2016 * | 719  | 157 | 92  | 184   | 286   |
| 2017-2018 * | 754  | 146 | 111 | 175   | 322   |
| 2019-2020 * | 666  | 112 | 97  | 145   | 312   |
| 2015-2020 * | 2139 | 415 | 300 | 504   | 920   |

\* Additionally including data from Montenegro since 2018, Romania since 2017 (coverage from 97% in 2017 to 95% in 2020), Serbia since 2016 (coverage 100% in 2016, 97% in 2017, and 90% in 2018-2020), and the Netherlands (coverage 100% in 2020, 94% in 2016, 93% in 2017-2019, and 94% in 2020)

Table D.2.2  
Incident counts by age, treatment modality, and cohort  
at day 1

| Cohort      | All  |     |     | 0-4 |     |    | 5-9 |    |    | 10-14 |    |     | 15-19 |     |     |
|-------------|------|-----|-----|-----|-----|----|-----|----|----|-------|----|-----|-------|-----|-----|
|             | HD   | PD  | Tx  | HD  | PD  | Tx | HD  | PD | Tx | HD    | PD | Tx  | HD    | PD  | Tx  |
|             | N    | N   | N   | N   | N   | N  | N   | N  | N  | N     | N  | N   | N     | N   | N   |
| 2015-2016   | 302  | 149 | 154 | 44  | 70  | 11 | 35  | 15 | 25 | 73    | 25 | 61  | 150   | 39  | 57  |
| 2017-2018   | 291  | 143 | 150 | 35  | 67  | 18 | 35  | 23 | 30 | 76    | 24 | 36  | 145   | 29  | 66  |
| 2019-2020   | 260  | 114 | 132 | 35  | 39  | 17 | 40  | 15 | 22 | 47    | 26 | 37  | 138   | 34  | 56  |
| 2015-2016 * | 350  | 171 | 190 | 56  | 81  | 19 | 39  | 20 | 31 | 84    | 27 | 69  | 171   | 43  | 71  |
| 2017-2018 * | 379  | 173 | 194 | 43  | 79  | 22 | 45  | 27 | 38 | 98    | 31 | 44  | 193   | 36  | 90  |
| 2019-2020 * | 350  | 147 | 167 | 43  | 49  | 20 | 47  | 22 | 27 | 69    | 32 | 44  | 191   | 44  | 76  |
| 2015-2020 * | 1079 | 491 | 551 | 142 | 209 | 61 | 131 | 69 | 96 | 251   | 90 | 157 | 555   | 123 | 237 |

For 18 patients information on treatment modality at start was unavailable

\* Additionally including data from Montenegro since 2018, Romania since 2017 (coverage from 97% in 2017 to 95% in 2020), Serbia since 2016 (coverage 100% in 2016, 97% in 2017, and 90% in 2018-2020), and the Netherlands (coverage 100% in 2020, 94% in 2016, 93% in 2017-2019, and 94% in 2020)

Table D.2.3  
Incident counts by age and primary renal disease  
between 2015 and 2020, at day 1

|                         | All | 0-4 | 5-9 | 10-14 | 15-19 |
|-------------------------|-----|-----|-----|-------|-------|
|                         | N   | N   | N   | N     | N     |
| CAKUT                   | 658 | 134 | 107 | 187   | 230   |
| Glomerulonephritis      | 385 | 77  | 50  | 73    | 185   |
| Cystic kidney disease   | 232 | 53  | 42  | 74    | 63    |
| Hereditary Nephropathy  | 205 | 64  | 26  | 32    | 83    |
| Ischaemic Renal Failure | 35  | 6   | 7   | 8     | 14    |
| HUS                     | 57  | 19  | 13  | 11    | 14    |
| Metabolic disorders     | 37  | 7   | 3   | 10    | 17    |
| Vasculitis              | 51  | 0   | 3   | 11    | 37    |
| Miscellaneous           | 203 | 38  | 19  | 30    | 116   |
| Missing, unknown        | 276 | 17  | 30  | 68    | 161   |

Abbreviations used: HUS: haemolytic uraemic syndrome; CAKUT: congenital anomalies of the kidney and urinary tract

Additionally including data from Montenegro since 2018, Romania since 2017 (coverage from 97% in 2017 to 95% in 2020), Serbia since 2016 (coverage 100% in 2016, 97% in 2017, and 90% in 2018-2020), and the Netherlands (coverage 100% in 2020, 94% in 2016, 93% in 2017-2019, and 94% in 2020)

## D2 INCIDENT PATIENTS ACCEPTED FOR KRT, AT DAY 1

Table D.2.4  
Incidence per million age-related population by age and cohort  
at day 1

| Cohort      | All   | 0-4   | 5-9   | 10-14 | 15-19 |
|-------------|-------|-------|-------|-------|-------|
|             | Pmarp | Pmarp | Pmarp | Pmarp | Pmarp |
| 2015-2016   | 9.2   | 7.8   | 4.4   | 9.6   | 14.9  |
| 2017-2018   | 8.9   | 7.8   | 5.2   | 8.0   | 14.4  |
| 2019-2020   | 7.6   | 6.0   | 4.6   | 6.2   | 13.3  |
| 2015-2016 * | 9.1   | 8.3   | 4.5   | 9.2   | 14.4  |
| 2017-2018 * | 8.5   | 7.0   | 5.0   | 7.7   | 14.3  |
| 2019-2020 * | 7.6   | 5.5   | 4.4   | 6.3   | 13.7  |
| 2015-2020 * | 8.4   | 6.9   | 4.6   | 7.7   | 14.1  |

\* Additionally including data from Montenegro since 2018, Romania since 2017 (coverage from 97% in 2017 to 95% in 2020), Serbia since 2016 (coverage 100% in 2016, 97% in 2017, and 90% in 2018-2020), and the Netherlands (coverage 100% in 2020, 94% in 2016, 93% in 2017-2019, and 94% in 2020)

Table D.2.5  
Incidence per million age-related population by age, treatment modality, and cohort  
at day 1

| Cohort      | All   |       |       | 0-4   |       |       | 5-9   |       |       | 10-14 |       |       | 15-19 |       |       |
|-------------|-------|-------|-------|-------|-------|-------|-------|-------|-------|-------|-------|-------|-------|-------|-------|
|             | HD    | PD    | Tx    |
|             | Pmarp |
| 2015-2016   | 4.5   | 2.2   | 2.3   | 2.7   | 4.3   | 0.7   | 2.0   | 0.9   | 1.4   | 4.3   | 1.5   | 3.6   | 9.0   | 2.4   | 3.4   |
| 2017-2018   | 4.4   | 2.1   | 2.2   | 2.2   | 4.3   | 1.2   | 2.0   | 1.3   | 1.7   | 4.4   | 1.4   | 2.1   | 8.6   | 1.7   | 3.9   |
| 2019-2020   | 3.9   | 1.7   | 2.0   | 2.3   | 2.6   | 1.1   | 2.4   | 0.9   | 1.3   | 2.7   | 1.5   | 2.1   | 8.0   | 2.0   | 3.3   |
| 2015-2016 * | 4.4   | 2.2   | 2.4   | 3.0   | 4.3   | 1.0   | 1.9   | 1.0   | 1.5   | 4.2   | 1.3   | 3.4   | 8.6   | 2.2   | 3.6   |
| 2017-2018 * | 4.3   | 2.0   | 2.2   | 2.1   | 3.8   | 1.1   | 2.0   | 1.2   | 1.7   | 4.3   | 1.4   | 1.9   | 8.6   | 1.6   | 4.0   |
| 2019-2020 * | 4.0   | 1.7   | 1.9   | 2.1   | 2.4   | 1.0   | 2.1   | 1.0   | 1.2   | 3.0   | 1.4   | 1.9   | 8.4   | 1.9   | 3.3   |
| 2015-2020 * | 4.2   | 1.9   | 2.2   | 2.4   | 3.5   | 1.0   | 2.0   | 1.1   | 1.5   | 3.8   | 1.4   | 2.4   | 8.5   | 1.9   | 3.6   |

For 18 patients information on treatment modality at start was unavailable

\* Additionally including data from Montenegro since 2018, Romania since 2017 (coverage from 97% in 2017 to 95% in 2020), Serbia since 2016 (coverage 100% in 2016, 97% in 2017, and 90% in 2018-2020), and the Netherlands (coverage 100% in 2020, 94% in 2016, 93% in 2017-2019, and 94% in 2020)

Table D.2.6  
Incidence per million age-related population by age and primary renal disease  
between 2015 and 2020, at day 1

|                         | All   | 0-4   | 5-9   | 10-14 | 15-19 |
|-------------------------|-------|-------|-------|-------|-------|
|                         | Pmarp | Pmarp | Pmarp | Pmarp | Pmarp |
| CAKUT                   | 2.6   | 2.2   | 1.7   | 2.8   | 3.5   |
| Glomerulonephritis      | 1.5   | 1.3   | 0.8   | 1.1   | 2.8   |
| Cystic kidney disease   | 0.9   | 0.9   | 0.6   | 1.1   | 1.0   |
| Hereditary Nephropathy  | 0.8   | 1.1   | 0.4   | 0.5   | 1.3   |
| Ischaemic Renal Failure | 0.1   | 0.1   | 0.1   | 0.1   | 0.2   |
| HUS                     | 0.2   | 0.3   | 0.2   | 0.2   | 0.2   |
| Metabolic disorders     | 0.1   | 0.1   | 0.0   | 0.2   | 0.3   |
| Vasculitis              | 0.2   | 0.0   | 0.0   | 0.2   | 0.6   |
| Miscellaneous           | 0.8   | 0.6   | 0.3   | 0.5   | 1.8   |
| Missing, unknown        | 1.1   | 0.3   | 0.5   | 1.0   | 2.5   |

Abbreviations used: HUS: haemolytic uraemic syndrome; CAKUT: congenital anomalies of the kidney and urinary tract

Additionally including data from Montenegro since 2018, Romania since 2017 (coverage from 97% in 2017 to 95% in 2020), Serbia since 2016 (coverage 100% in 2016, 97% in 2017, and 90% in 2018-2020), and the Netherlands (coverage 100% in 2020, 94% in 2016, 93% in 2017-2019, and 94% in 2020)

**D3 PREVALENT PATIENTS ON KRT**

Table D.3.1  
**Prevalent counts by age and cohort**  
*prevalent patients on December 31*

| Cohort | All  | 0-4 | 5-9 | 10-14 | 15-19 |
|--------|------|-----|-----|-------|-------|
|        | N    | N   | N   | N     | N     |
| 2015   | 2036 | 176 | 340 | 596   | 924   |
| 2016   | 2091 | 174 | 350 | 589   | 978   |
| 2017   | 2141 | 164 | 365 | 591   | 1021  |
| 2018   | 2155 | 179 | 349 | 600   | 1027  |
| 2019   | 2149 | 162 | 364 | 583   | 1040  |
| 2020   | 2151 | 143 | 373 | 585   | 1050  |
| 2015 * | 2362 | 203 | 414 | 675   | 1070  |
| 2016 * | 2486 | 203 | 439 | 681   | 1163  |
| 2017 * | 2636 | 198 | 452 | 718   | 1268  |
| 2018 * | 2649 | 217 | 431 | 732   | 1269  |
| 2019 * | 2625 | 189 | 435 | 737   | 1264  |
| 2020 * | 2643 | 171 | 441 | 740   | 1291  |

\* Additionally including data from Montenegro since 2018, Romania since 2017 (coverage from 97% in 2017 to 95% in 2020), Serbia since 2016 (coverage 100% in 2016, 97% in 2017, and 90% in 2018-2020), and the Netherlands (coverage 100% in 2015, 96% in 2016, 97% 2017, 96% in 2018-2020)

Table D.3.2  
**Prevalent counts by age, treatment modality, and cohort**  
*prevalent patients on December 31*

| Cohort | All |     |      | 0-4 |    |     | 5-9 |    |     | 10-14 |    |     | 15-19 |    |      |
|--------|-----|-----|------|-----|----|-----|-----|----|-----|-------|----|-----|-------|----|------|
|        | HD  | PD  | Tx   | HD  | PD | Tx  | HD  | PD | Tx  | HD    | PD | Tx  | HD    | PD | Tx   |
|        | N   | N   | N    | N   | N  | N   | N   | N  | N   | N     | N  | N   | N     | N  | N    |
| 2015   | 286 | 136 | 1570 | 32  | 58 | 82  | 40  | 28 | 268 | 77    | 21 | 484 | 137   | 29 | 736  |
| 2016   | 275 | 144 | 1622 | 35  | 56 | 79  | 45  | 20 | 280 | 58    | 37 | 477 | 137   | 31 | 786  |
| 2017   | 277 | 144 | 1676 | 32  | 50 | 80  | 45  | 27 | 289 | 61    | 33 | 488 | 139   | 34 | 819  |
| 2018   | 277 | 156 | 1683 | 26  | 63 | 87  | 36  | 29 | 282 | 73    | 32 | 487 | 142   | 32 | 827  |
| 2019   | 291 | 136 | 1698 | 29  | 53 | 80  | 44  | 25 | 293 | 76    | 31 | 472 | 142   | 27 | 853  |
| 2020   | 283 | 122 | 1730 | 34  | 41 | 68  | 39  | 18 | 316 | 58    | 25 | 497 | 152   | 38 | 849  |
| 2015 * | 314 | 158 | 1846 | 36  | 65 | 98  | 49  | 33 | 328 | 79    | 25 | 557 | 150   | 35 | 863  |
| 2016 * | 320 | 169 | 1947 | 43  | 63 | 93  | 52  | 27 | 355 | 67    | 41 | 556 | 158   | 38 | 943  |
| 2017 * | 376 | 186 | 2024 | 40  | 57 | 98  | 53  | 35 | 359 | 87    | 41 | 578 | 196   | 53 | 989  |
| 2018 * | 392 | 200 | 2014 | 31  | 74 | 108 | 49  | 38 | 341 | 104   | 43 | 576 | 208   | 45 | 989  |
| 2019 * | 405 | 174 | 2021 | 35  | 62 | 92  | 55  | 28 | 350 | 112   | 45 | 575 | 203   | 39 | 1004 |
| 2020 * | 404 | 165 | 2058 | 40  | 50 | 81  | 50  | 25 | 366 | 91    | 37 | 607 | 223   | 53 | 1004 |

\* Additionally including data from Montenegro since 2018, Romania since 2017 (coverage from 97% in 2017 to 95% in 2020), Serbia since 2016 (coverage 100% in 2016, 97% in 2017, and 90% in 2018-2020), and the Netherlands (coverage 100% in 2015, 96% in 2016, 97% 2017, 96% in 2018-2020)

Table D.3.3  
**Prevalent counts by age and primary renal disease**  
*prevalent patients on December 31, 2020*

|                         | All | 0-4 | 5-9 | 10-14 | 15-19 |
|-------------------------|-----|-----|-----|-------|-------|
|                         | N   | N   | N   | N     | N     |
| CAKUT                   | 931 | 55  | 163 | 280   | 433   |
| Glomerulonephritis      | 399 | 26  | 71  | 103   | 199   |
| Cystic kidney disease   | 314 | 24  | 47  | 89    | 154   |
| Hereditary Nephropathy  | 290 | 31  | 72  | 76    | 111   |
| Ischaemic Renal Failure | 52  | 1   | 9   | 20    | 22    |
| HUS                     | 79  | 3   | 15  | 23    | 38    |
| Metabolic disorders     | 68  | 6   | 5   | 24    | 33    |
| Vasculitis              | 31  | 0   | 3   | 7     | 21    |
| Miscellaneous           | 200 | 16  | 32  | 44    | 108   |
| Missing, unknown        | 279 | 9   | 24  | 74    | 172   |

Abbreviations used: HUS: haemolytic uraemic syndrome; CAKUT: congenital anomalies of the kidney and urinary tract  
Including data from all countries, also those with incomplete coverage



**D3 PREVALENT PATIENTS ON KRT**

Table D.3.4  
**Prevalence per million age-related population by age and cohort**  
*prevalent patients on December 31*

| Cohort | All   | 0-4   | 5-9   | 10-14 | 15-19 |
|--------|-------|-------|-------|-------|-------|
|        | Pmarp | Pmarp | Pmarp | Pmarp | Pmarp |
| 2015   | 60.8  | 21.7  | 39.2  | 70.8  | 112.1 |
| 2016   | 62.4  | 21.8  | 40.3  | 69.4  | 117.3 |
| 2017   | 64.0  | 20.8  | 42.3  | 69.1  | 121.7 |
| 2018   | 64.5  | 23.1  | 40.7  | 69.4  | 121.5 |
| 2019   | 64.2  | 21.1  | 42.9  | 66.5  | 121.5 |
| 2020   | 64.4  | 19.0  | 44.5  | 66.1  | 121.5 |
| 2015 * | 60.6  | 21.6  | 41.4  | 68.6  | 110.1 |
| 2016 * | 61.7  | 21.2  | 42.5  | 66.7  | 114.7 |
| 2017 * | 59.7  | 19.0  | 40.1  | 63.7  | 113.0 |
| 2018 * | 59.8  | 20.9  | 38.4  | 64.2  | 112.1 |
| 2019 * | 59.3  | 18.4  | 39.2  | 64.0  | 110.9 |
| 2020 * | 60.1  | 17.0  | 40.3  | 64.1  | 113.0 |

\* Additionally including data from Montenegro since 2018, Romania since 2017 (coverage from 97% in 2017 to 95% in 2020), Serbia since 2016 (coverage 100% in 2016, 97% in 2017, and 90% in 2018-2020), and the Netherlands (coverage 100% in 2015, 96% in 2016, 97% 2017, 96% in 2018-2020)

Table D.3.5  
**Prevalence per million age-related population by age, treatment modality, and cohort**  
*prevalent patients on December 31*

| Cohort | All   |       |       | 0-4   |       |       | 5-9   |       |       | 10-14 |       |       | 15-19 |       |       |
|--------|-------|-------|-------|-------|-------|-------|-------|-------|-------|-------|-------|-------|-------|-------|-------|
|        | HD    | PD    | Tx    |
|        | Pmarp |
| 2015   | 8.5   | 4.1   | 46.9  | 3.9   | 7.1   | 10.1  | 4.6   | 3.2   | 30.9  | 9.1   | 2.5   | 57.5  | 16.6  | 3.5   | 89.3  |
| 2016   | 8.2   | 4.3   | 48.4  | 4.4   | 7.0   | 9.9   | 5.2   | 2.3   | 32.2  | 6.8   | 4.4   | 56.2  | 16.4  | 3.7   | 94.2  |
| 2017   | 8.3   | 4.3   | 50.1  | 4.1   | 6.4   | 10.2  | 5.2   | 3.1   | 33.5  | 7.1   | 3.9   | 57.1  | 16.6  | 4.1   | 97.6  |
| 2018   | 8.3   | 4.7   | 50.3  | 3.3   | 8.1   | 11.2  | 4.2   | 3.4   | 32.9  | 8.4   | 3.7   | 56.4  | 16.8  | 3.8   | 97.8  |
| 2019   | 8.7   | 4.1   | 50.7  | 3.8   | 6.9   | 10.4  | 5.2   | 2.9   | 34.5  | 8.7   | 3.5   | 53.9  | 16.6  | 3.2   | 99.7  |
| 2020   | 8.5   | 3.7   | 51.8  | 4.5   | 5.5   | 9.0   | 4.6   | 2.1   | 37.7  | 6.6   | 2.8   | 56.2  | 17.6  | 4.4   | 98.3  |
| 2015 * | 8.1   | 4.1   | 47.4  | 3.8   | 6.9   | 10.4  | 4.9   | 3.3   | 32.8  | 8.0   | 2.5   | 56.6  | 15.4  | 3.6   | 88.8  |
| 2016 * | 7.9   | 4.2   | 48.4  | 4.5   | 6.6   | 9.7   | 5.0   | 2.6   | 34.4  | 6.6   | 4.0   | 54.5  | 15.6  | 3.7   | 93.0  |
| 2017 * | 8.5   | 4.2   | 45.8  | 3.8   | 5.5   | 9.4   | 4.7   | 3.1   | 31.9  | 7.7   | 3.6   | 51.2  | 17.5  | 4.7   | 88.1  |
| 2018 * | 8.8   | 4.5   | 45.5  | 3.0   | 7.1   | 10.4  | 4.4   | 3.4   | 30.4  | 9.1   | 3.8   | 50.5  | 18.4  | 4.0   | 87.4  |
| 2019 * | 9.2   | 3.9   | 45.7  | 3.4   | 6.0   | 9.0   | 5.0   | 2.5   | 31.5  | 9.7   | 3.9   | 50.0  | 17.8  | 3.4   | 88.1  |
| 2020 * | 9.2   | 3.8   | 46.8  | 4.0   | 5.0   | 8.0   | 4.6   | 2.3   | 33.5  | 7.9   | 3.2   | 52.6  | 19.5  | 4.6   | 87.9  |

\* Additionally including data from Montenegro since 2018, Romania since 2017 (coverage from 97% in 2017 to 95% in 2020), Serbia since 2016 (coverage 100% in 2016, 97% in 2017, and 90% in 2018-2020), and the Netherlands (coverage 100% in 2015, 96% in 2016, 97% 2017, 96% in 2018-2020)

Table D.3.6  
**Prevalence per million age-related population by age and primary renal disease**  
*prevalent patients on December 31, 2020*

|                         | All   | 0-4   | 5-9   | 10-14 | 15-19 |
|-------------------------|-------|-------|-------|-------|-------|
|                         | Pmarp | Pmarp | Pmarp | Pmarp | Pmarp |
| CAKUT                   | 21.2  | 5.5   | 14.9  | 24.3  | 37.9  |
| Glomerulonephritis      | 9.1   | 2.6   | 6.5   | 8.9   | 17.4  |
| Cystic kidney disease   | 7.1   | 2.4   | 4.3   | 7.7   | 13.5  |
| Hereditary Nephropathy  | 6.6   | 3.1   | 6.6   | 6.6   | 9.7   |
| Ischaemic Renal Failure | 1.2   | 0.1   | 0.8   | 1.7   | 1.9   |
| HUS                     | 1.8   | 0.3   | 1.4   | 2.0   | 3.3   |
| Metabolic disorders     | 1.5   | 0.6   | 0.5   | 2.1   | 2.9   |
| Vasculitis              | 0.7   |       | 0.3   | 0.6   | 1.8   |
| Miscellaneous           | 4.5   | 1.6   | 2.9   | 3.8   | 9.5   |
| Missing, unknown        | 6.3   | 0.9   | 2.2   | 6.4   | 15.1  |

Abbreviations used: HUS: haemolytic uraemic syndrome; CAKUT: congenital anomalies of the kidney and urinary tract  
Including data from all countries, also those with incomplete coverage

**Methods**

## VI Methods

The ERA Registry is located at the Department of Medical Informatics in the Amsterdam University Medical Centers, location Academic Medical Center in Amsterdam, the Netherlands. This department hosts several clinical registries which share a quality management system with standard operating procedures for data collection, data storage, data analysis, and the production of the annual report. The quality management system has been certified according to the ISO 9001:2000 norm since 2004, according to the ISO 9001:2008 norm since 2010 and according to the ISO 9001:2015 norm since 2016. In addition, ISO 27001 certification for information security management was obtained in 2018.

### Data collection and preparation

#### Individual patient data

##### General Data Protection Regulation (GDPR)

All registries participating with individual patient data in this annual report have signed a Data Transfer Agreement with the AMC Medical Research B.V., where the ERA Registry is located.

##### Data collection

On an annual basis data sets containing individual patient data are uploaded to the ERA Registry office in Amsterdam. Supported file formats for data delivery include Microsoft Access, Microsoft Excel, SPSS, SAS, and delimited text files. Collaborating registries upload their data via a secure data upload portal.

##### Variables

The ERA Registry asks national and regional registries for the data shown in Table 1.

**Table 1: Variables collected for individual patients**

| <b>Patient data</b>     | <b>Transaction data</b>   |
|-------------------------|---------------------------|
| Patient identifier      | Patient identifier        |
| Country of registry     | Date of event             |
| Month and year of birth | Type of event / treatment |
| Sex                     | Cause of death            |
| Primary Renal Disease   | Treatment centre          |
| Date of first KRT       | Source registry           |
|                         | Destination registry      |

##### **Collaborating registries and participating countries**

Individual patient data from 35 national and regional registries in 18 countries were used to create the tables in Section B of this annual report.

Registry data are subject to continuous alteration and improvement. Small differences between ERA Registry data and the data presented in the national and regional registry's own annual reports may result from different times of data extraction.

The data on Spain presented in Section B of this report are based on separate data sets received from 16 of 19 regions: Andalusia, Aragon, Asturias, Basque country, Canary Islands, Cantabria, Castile and León, Castile-La Mancha, Catalonia, Community of Madrid, Extremadura, Galicia, La Rioja, Murcia, Navarre, and Valencian region.

## **Differences between collaborating registries**

### *Definitions and collection of data*

In the comparison of data between registries it should be recognized that there may be small differences between registries in definitions and in the collection of their data. For example, the different registries do not collect data at the same level of detail, especially with regard to the various subtypes of treatment modalities.

### *Patient population*

The data from Belgium (Dutch-speaking), Belgium (French-speaking), Spain (Cantabria), Spain (Castile and León), Spain (Castile-La Mancha) and Spain (Navarre) is comprised of patients older than 20 years of age. It has been estimated that the inclusion of data on children would add approximately 2 per million population (Pmp) to the incidence rate and about 13 Pmp to the prevalence.

For the calculation of the incidence of those alive and on KRT on day 91, registries were asked to provide data with follow-up until 31st March 2021. For the following registries data were only available until 31st December 2020: France, Montenegro, Spain (Castile and León), Spain (Catalonia), Spain (Valencian region), Switzerland and the United Kingdom (England, Wales and Northern Ireland). For these registries the incidence on day 91 was estimated as explained in the paragraph on statistical analyses.

## **Data loading and cleaning**

The data from the registries were imported using an in-house developed import utility. This program first uniformes the data and then translates any non-standard codes. Consistency checks were performed, and thereafter the data were converted to the desired format in order to make the storage of the data in the relational and event-driven database possible. The new data, provided by the national and regional registries, replaced all existing data in the ERA Registry database. In this way changes in the data sets made by the national and regional registries were adopted by the ERA Registry. The import utility performed extensive logging and the logging-results were used to provide the national and regional registries with feedback concerning inconsistencies or other problems identified in the data.

After data analysis, the results were checked by the national and regional registries. In the case of discrepancies potential problems regarding (the interpretation of) the data set were solved. Thereafter, more detailed reports were produced which needed approval from the registry representative before publication in this ERA Registry Annual Report.

## **ERA Registry database**

Microsoft SQL Server (a database management system) was used to manage the ERA Registry database. This relational and event-driven database consists of a patient and a transaction table which can be extended according to future needs.

## **General population data**

Midyear population data of the contributing countries were provided by Eurostat [1] or the national bureau of statistics. The sources of the population data used for the analyses in Section B are shown in Table 2. For countries and regions where the coverage of the general population was lower than 100%, population data were adjusted for this lower coverage where applicable.

## **Reference population**

In this year's Annual Report, the age and sex distribution of the EU28 of 2015 as provided by Eurostat [1] was used for the adjustment of the incidence and prevalence for age and sex. The age and sex distribution of EU28 in 2015 is shown in Table 3.

**Table 2: Sources of the general population data for the national and regional registries participating with individual patient data in Section B**

| Registry                                       | Sources of general population data of 2020 |
|------------------------------------------------|--------------------------------------------|
| Austria                                        | www.statistik.at                           |
| Belgium, Dutch-speaking                        | www.ec.europa.eu/eurostat                  |
| Belgium, French-speaking                       | www.ec.europa.eu/eurostat                  |
| Bosnia and Herzegovina                         | www.popis2013.ba                           |
| Denmark                                        | www.ec.europa.eu/eurostat                  |
| Greenland                                      | www.stat.gl                                |
| Estonia                                        | www.ec.europa.eu/eurostat                  |
| Finland                                        | www.ec.europa.eu/eurostat                  |
| France                                         | www.ec.europa.eu/eurostat                  |
| Greece                                         | www.ec.europa.eu/eurostat                  |
| Iceland                                        | www.ec.europa.eu/eurostat                  |
| Montenegro                                     | www.ec.europa.eu/eurostat                  |
| Norway                                         | www.ec.europa.eu/eurostat                  |
| Romania                                        | www.ec.europa.eu/eurostat                  |
| Serbia                                         | www.ec.europa.eu/eurostat                  |
| Spain, Andalusia                               | www.ine.es                                 |
| Spain, Aragon                                  | www.ine.es                                 |
| Spain, Asturias                                | www.ine.es                                 |
| Spain, Basque country                          | www.ine.es                                 |
| Spain, Canary Islands                          | www.ine.es                                 |
| Spain, Cantabria                               | www.ine.es                                 |
| Spain, Castile and León                        | www.ine.es                                 |
| Spain, Castile-La Mancha                       | www.ine.es                                 |
| Spain, Catalonia                               | www.ine.es                                 |
| Spain, Community of Madrid                     | www.ine.es                                 |
| Spain, Extremadura                             | www.ine.es                                 |
| Spain, Galicia                                 | www.ine.es                                 |
| Spain, La Rioja                                | www.ine.es                                 |
| Spain, Murcia                                  | www.ine.es                                 |
| Spain, Navarre                                 | www.ine.es                                 |
| Spain, Valencian Region                        | www.ine.es                                 |
| Sweden                                         | www.ec.europa.eu/eurostat                  |
| Switzerland                                    | www.ec.europa.eu/eurostat                  |
| the Netherlands                                | www.ec.europa.eu/eurostat                  |
| United Kingdom, England/Northern Ireland/Wales | www.ons.gov.uk                             |
| United Kingdom, Scotland                       | www.ons.gov.uk                             |

**Table 3: The age and sex distribution of the reference population EU28 (2015)**

| Age groups | All         | Men         | Women       |
|------------|-------------|-------------|-------------|
|            | N           | N           | N           |
| 0-4        | 26.080.215  | 13.376.223  | 12.703.992  |
| 5-9        | 27.002.227  | 13.850.526  | 13.151.701  |
| 10-14      | 26.227.134  | 13.452.249  | 12.774.885  |
| 15-19      | 27.066.270  | 13.899.601  | 13.166.669  |
| 20-24      | 29.807.980  | 15.216.810  | 14.591.170  |
| 25-29      | 32.114.517  | 16.237.856  | 15.876.661  |
| 30-34      | 33.691.738  | 16.937.719  | 16.754.019  |
| 35-39      | 34.895.079  | 17.541.655  | 17.353.424  |
| 40-44      | 36.308.691  | 18.206.486  | 18.102.205  |
| 45-49      | 37.694.663  | 18.841.293  | 18.853.370  |
| 50-54      | 36.604.020  | 18.149.554  | 18.454.466  |
| 55-59      | 33.996.743  | 16.626.202  | 17.370.541  |
| 60-64      | 31.045.915  | 14.911.173  | 16.134.742  |
| 65-69      | 27.676.825  | 13.064.797  | 14.612.028  |
| 70-74      | 22.290.449  | 10.167.747  | 12.122.702  |
| 75-79      | 19.271.582  | 8.274.167   | 10.997.415  |
| 80-84      | 14.094.690  | 5.520.132   | 8.574.558   |
| 85+        | 12.671.365  | 3.958.804   | 8.712.561   |
| Total      | 508.540.103 | 248.232.994 | 260.307.109 |

## **Aggregated data**

### **Data collection**

Section C relates to national and regional registries providing the ERA Registry with aggregated data. Data were provided via a Microsoft Excel template and imported for inclusion in this annual report.

### ***Collaborating registries***

Aggregated data from 17 national and regional registries were used for the preparation of the tables in Section C. The following countries participated in Section C of this year's annual report: Albania, Belarus, Croatia, Cyprus, Czech Republic, Hungary, Israel, Italy, Kosovo\*, Lithuania, North Macedonia, Poland, Portugal, Russia, Slovakia, Spain, and Turkey.

Data from Italy are based on eight of the 20 regions: Calabria, Emilia-Romagna, Liguria, Marche, Piedmont, Puglia, Trentino-Alto Adige, and Veneto.

### **Data loading and cleaning**

The Microsoft Excel template used for data collection includes automated consistency checks. Additional checks were performed manually and data were compared with previous reports. In case of inconsistencies potential problems regarding (the interpretation of) the data set were solved together with the collaborating registry.

### **General population data**

The population data needed for the calculation of incidence and prevalence Pmp were reported by the collaborating registries. If the coverage of the general population in a country by the registry was lower than 100%, population counts were adjusted for this where applicable.

### **Reference population**

As in Section B, we used the age and sex distribution of the EU28 of 2015 (see Table 3) as provided by Eurostat [1] for the adjustment of incidence rates and prevalence.

## **Coding systems**

### ***Primary renal disease***

Renal diseases were defined according to both the old and new (2018) ERA coding systems and subsequently classified into groups (Appendix 1 and 2). When the 2018 PRD codes were provided, they were categorized into the old PRD groups, which resulted in a somewhat different distribution of the PRD groups.

### ***Causes of death***

Causes of death were defined according to the ERA coding systems and subsequently classified into groups (Appendix 3).

### ***Event type codes***

Appendix 4 provides an overview of the coding currently used for event type codes in the ERA database.

## **Statistical analyses**

An overview of the renal registries contributing data for the different types of analyses is given in Appendix 5. For the data analyses SAS 9.4 [2] was used. This statistical software package is able to maintain large datasets, is syntax driven which increases reproducibility of results, and has extensive capabilities with regard to statistics and data management.

*\*This designation is without prejudice to positions on status, and is in line with UNSCR 1244/99 and the ICJ Opinion on the Kosovo declaration of independence*

## Summary section

The tables and figures in the summary section are based on data both from registries providing individual patient data and registries providing aggregated data. Summary statistics were calculated for all registries providing individual patient data, for all registries providing aggregated data and for all registries combined. Where possible these summary statistics were calculated as the sum of the individual values. In all other cases summary statistics were calculated as weighted averages. The weights were dependent on the denominator (i.e. the population size for Pmp values and the total incident count or prevalent count for percentages) and were calculated as the contribution of the registry to the total of the registries.

## Individual patient data

### Incidence and prevalence

The incidence and prevalence tables were based on 35 data sets from national or regional registries from 18 countries that provided individual patient data for 2020, including Austria, Belgium (Dutch-speaking), Belgium (French-speaking), Bosnia and Herzegovina, Denmark, Estonia, Finland, France, Greece, Iceland, Montenegro, Norway, Romania, Serbia, Spain (Andalusia), Spain (Aragon), Spain (Asturias), Spain (Basque country), Spain (Canary Islands), Spain (Cantabria), Spain (Castile and León), Spain (Castile-La Mancha), Spain (Catalonia), Spain (Community of Madrid), Spain (Extremadura), Spain (Galicia), Spain (La Rioja), Spain (Murcia), Spain (Navarre), Spain (Valencian region), Sweden, Switzerland, the Netherlands, United Kingdom (England/Northern Ireland/Wales) and United Kingdom (Scotland).

### Methods for calculating incidence and prevalence

The incidence and the prevalence of those alive and on KRT were calculated for the total population and for subgroups based on sex, age group, treatment modality, and primary renal disease. The incidence or prevalence Pmp is the observed incident or prevalent count divided by the general population in that year and multiplied by one million. For the incidence or prevalence per million age-related population (Pmarp) the observed incident or prevalent count per age category was divided by the general population in that age category and multiplied by one million.

For those registries that had no data available with a follow-up until March 31st, 2021, the incidence of KRT on day 91 was estimated. We assumed that the relative difference between the incidence on day 1 and the incidence on day 91 was similar for patients who started KRT in the first nine months of 2020, when compared to patients who started KRT in the last three months of 2020.

For the calculation of the mean and median age for incident patients on day 91, we used the actual age on day 91.

### Adjustment of incidence and prevalence

Differences in the unadjusted incidence and prevalence across countries might be due to the differences in the age and sex distribution of the general population. The EU28 age and sex distribution of the European population (Table 3) was therefore used to adjust incidence and prevalence for age and sex [1]. Adjusted rates were derived by applying the weights of the reference population to the observed variable-specific rates (e.g. incidence rate per age group) in a country. This weighted average provides a single summary rate for each country that would be expected if that country had the age and sex distribution of the reference population. The following example shows how to calculate the age-adjusted incidence rate. In this example the incidence rate of country A is 269 Pmp, the age-specific rates of country A and the reference population distribution with respect to age are shown in Table 4.

**Table 4: Calculation of the adjusted incidence rate**

| Age groups | Incidence rate<br>country A | Reference<br>population |
|------------|-----------------------------|-------------------------|
|            | Pmp                         | %                       |
| 0-19       | 332                         | 31.7                    |
| 20-44      | 261                         | 39.3                    |
| 45-64      | 64                          | 29.0                    |
| Total      | 269                         | 100                     |

The adjusted incident rate of country A is:  $(0.317 * 332) + (0.393 * 261) + (0.29 * 64) = 226$  Pmp

### Performed kidney transplants

For all participating countries and regions the number of kidney transplants performed during the year was presented by donor type. In Iceland the number of transplants was somewhat lower, because several patients received transplants in other countries. Rates are expressed as numbers, percentages and Pmp.

## Survival probability

In this annual report, patient survival on KRT, patient survival on dialysis, patient survival after the first transplant, and graft survival after the first transplant are presented in tables by age, sex and primary renal disease. In addition, patient survival is presented in figures by primary renal disease and by treatment modality. Survival probabilities are presented as percentages from 0 to 100.

For this report the survival analyses were based on data from Austria, Belgium (Dutch-speaking), Belgium (French-speaking), Bosnia and Herzegovina, Denmark, Estonia, Finland, France, Greece, Iceland, Norway, Spain (Andalusia), Spain (Aragon), Spain (Asturias), Spain (Basque country), Spain (Cantabria), Spain (Castile and León), Spain (Castile-La Mancha), Spain (Catalonia), Spain (Community of Madrid), Spain (Extremadura), Spain (Galicia), Spain (Murcia), Spain (Valencian region), Sweden, the Netherlands, United Kingdom (England/Wales/ Northern Ireland) and United Kingdom (Scotland). The differences between the survival probabilities in this annual report and survival probabilities published in earlier annual reports of the ERA Registry may be partly due to differences in participating countries.

Survival was analysed from day 1 and from day 91 onwards for those patients alive and on KRT on those days. For the analysis of survival data two five-year cohorts were used:

- 2011-2015 - for the presentation of 90-day, one-, two- and five-year survival probabilities.
- 2014-2018 - for the presentation of 90-day, one- and two-year survival probabilities.

31st December 2020 was applied as censoring date for all survival analyses. Only for the United Kingdom (Scotland) 31st December 2019 was applied as censoring date. For the different types of survival analysis the events and reasons for censoring were defined as shown in Table 5.

**Table 5: Overview of the events and reasons for censoring as defined for the survival analyses in Section B**

| Survival type                          | Event                                                   | Censoring                                                                                     |
|----------------------------------------|---------------------------------------------------------|-----------------------------------------------------------------------------------------------|
| Patients on kidney replacement therapy | Death of patient                                        | Recovery of renal function *<br>Loss to follow-up<br>End of follow-up time                    |
| Patients on dialysis                   |                                                         |                                                                                               |
| 1)                                     | Death of patient                                        | Transplantation<br>Recovery of renal function *<br>Loss to follow-up<br>End of follow-up time |
| 2)                                     | Death of patient                                        | Recovery of renal function *<br>Loss to follow-up<br>End of follow-up time                    |
| First transplant recipients            | Death of patient                                        | Loss to follow-up<br>End of follow-up time                                                    |
| First graft                            | Death of patient<br>Graft failure<br>Re-transplantation | Loss to follow-up<br>End of follow-up time                                                    |

\* This was only considered as a censored observation when a patient's renal function had recovered for a period of more than 30 days.

## Unadjusted survival probabilities

Unadjusted survival probabilities were calculated using the Kaplan-Meier method. In the unadjusted survival analysis the cells in the tables were left blank when there were less than 100 patients in that cell.

## Adjusted survival probabilities

The Cox regression model was used to calculate survival probabilities while accounting for confounders [3]. Survival probabilities were adjusted for age, sex and primary renal disease. As the KRT population changes over time, it was decided to adjust for fixed values for a number of variables in the survival analyses to make the results comparable across time periods. The fixed values of variables used for the survival tables are shown in Table 6.

In the tables presenting the adjusted survival probabilities, cells with less than 100 patients were left empty. Patients for whom age, sex, or primary renal disease was missing were excluded.



**Table 6: Overview of the variables used to adjust the survival probabilities in Section B**

| <b>Survival type</b>                         | <b>Age</b> | <b>Sex</b> | <b>Renal disease</b>                                                                                    |
|----------------------------------------------|------------|------------|---------------------------------------------------------------------------------------------------------|
| Patients on kidney replacement therapy       | 67 years   | 63% men    | 24% Diabetes<br>19% Hypertension / renal vascular disease<br>11% Glomerulonephritis<br>46% Other causes |
| Patients on dialysis                         | 67 years   | 63% men    | 24% Diabetes<br>19% Hypertension / renal vascular disease<br>11% Glomerulonephritis<br>46% Other causes |
| First transplant recipients (deceased donor) | 50 years   | 63% men    | 14% Diabetes<br>10% Hypertension / renal vascular disease<br>23% Glomerulonephritis<br>53% Other causes |
| First transplant recipients (living donor)   | 50 years   | 63% men    | 14% Diabetes<br>10% Hypertension / renal vascular disease<br>23% Glomerulonephritis<br>53% Other causes |

### **Confidence intervals**

When survival probabilities were calculated using the Kaplan-Meier method or Cox regression method, the corresponding confidence intervals were calculated according to Bie et al. [4], using the standard error.

### **Expected remaining lifetimes**

Expected remaining lifetimes represent the average number of years of life remaining for those who have reached a given age. In this annual report, expected remaining lifetimes were calculated for patients receiving KRT and for the general population. For the calculation of expected remaining lifetimes of both groups, we adopted the methodology used by the United States Renal Data System (USRDS)[5]. In order to calculate expected remaining lifetimes we used data from registries providing complete follow-up data for the period from 2016 to 2020. Consequently, the data of the following national or regional registries from 12 countries were suitable for this analysis: Austria, Belgium (Dutch-speaking), Belgium (French-speaking), Bosnia and Herzegovina, Denmark, Estonia, Finland, France, Greece, Iceland, Norway, Spain (Andalusia), Spain (Aragon), Spain (Asturias), Spain (Basque Country), Spain (Cantabria), Spain (Castile and León), Spain (Castile-La Mancha), Spain (Catalonia), Spain (Community of Madrid), Spain (Extremadura), Spain (Galicia), Spain (La Rioja), Spain (Valencian region), Sweden, the Netherlands, United Kingdom (England, Northern Ireland and Wales), United Kingdom (Scotland). With regard to the inclusion of the data, it should be noted that the differences between the expected remaining lifetimes of this annual report and expected remaining lifetimes published in earlier annual reports of the ERA Registry may be partly due to differences in participating countries.

### **KRT population**

The expected remaining lifetimes for KRT patients are presented by age, sex and treatment modality. The expected remaining lifetime for a certain patient group is the average of the remaining life expectancies for the patients in that group. Although this cannot be known until all the patients in the group have died, the expected remaining lifetime can be projected by assuming that patients in the patient group will die at the same rates as those observed among older groups of recent prevalent KRT patients.

### **General population**

The number of deaths Pmp by sex and age of the general population of the contributing countries were provided by Eurostat [1]. The size of the contribution of each country to the general population that was used to calculate expected remaining lifetimes was in proportion to the size of the general population covered by its renal registry.

### **Aggregated data**

Incidence and prevalence counts were provided by the contributing registries. To increase the consistency of the data, general explanations of how to complete the Microsoft Excel template and how the adjusted incidence and prevalence were calculated were provided to support the participating registries.

## Paediatric Section

The incidence and prevalence tables in Section D of this annual report were based on data from 26 national or regional registries from 15 countries that provided complete individual patient data in their paediatric population for 2015 to 2020, including Austria, Bosnia and Herzegovina, Denmark, Estonia, Finland, France, Greece, Iceland, Montenegro, Norway, Romania, Serbia, Spain (Andalusia), Spain (Aragon), Spain (Asturias), Spain (Basque country), Spain (Canary Islands), Spain (Catalonia), Spain (Community of Madrid), Spain (Extremadura), Spain (Galicia), Spain (La Rioja), Spain (Murcia), Spain (Valencian Region), Sweden, and the Netherlands. For Romania the coverage decreased from 97% in 2017 to 95% in 2020, and for the Netherlands the coverage was 94% for the incidence and 96% for the prevalence in 2016, 93% for the incidence and 97% for the prevalence in 2017, 93% for the incidence in 2018 and 2019, and 96% for the prevalence in 2018, 2019 and 2020, and 94% for the incidence in 2020, and 100% in all other years, and for Serbia the coverage decreased from 100% in 2016 to 97% in 2017 and 90% in 2018, 2019 and 2020.

Serbia provided data since 2016, and Montenegro since 2018, and Spain (La Rioja) since 2019. Furthermore, as not every region in Spain had a specialised paediatric centre, paediatric patients could be treated in other regions than their resident region. This would result in an underestimation of the incidence and prevalence in these regions. To allow for this, non-resident paediatric patients were not excluded from the paediatric tables.

Incidence (on day 1) and prevalence on KRT were calculated for subgroups based on age, treatment modality, and primary renal disease. Incidence on KRT by 2-year cohorts was presented for paediatric patients who started KRT between 2015 and 2020. The cohorts 2015-2016, 2017-2018 and 2019-2020 were presented twice, once including and once excluding the countries with a limited follow-up to allow for a comparison over time. The incidence rate on KRT (P<sub>marp</sub>) was the observed incident count in that particular time period divided by the age-related general population in that time period (for example the total population in 2019 plus the total population in 2020) multiplied by one million. The grouping of primary renal disease codes for the paediatric population is described in Table 7 as it differs from the grouping in the adult population.

**Table 7: Grouping of primary renal diseases for paediatric patients in Section D**  
*Groups and codes included*

| Primary renal disease group                                  | Primary renal disease code (see appendix 1)                                                    |
|--------------------------------------------------------------|------------------------------------------------------------------------------------------------|
| Congenital anomalies of the kidney and urinary tract (CAKUT) | 20, 21, 22, 23, 24, 25, 29, 60, 61, 63, and 66                                                 |
| Glomerulonephritis                                           | 10, 11, 12, 13, 14, 15, 16, 17, 19, and 86                                                     |
| Cystic kidney disease                                        | 40, 41, 42, 43, and 49                                                                         |
| Hereditary nephropathy                                       | 50, 51, and 59                                                                                 |
| Ischaemic renal failure                                      | 90                                                                                             |
| Haemolytic uraemic syndrome (HUS)                            | 88                                                                                             |
| Metabolic disorders                                          | 52, 53, 54, 92, and 93                                                                         |
| Vasculitis                                                   | 73, 74, 84, 85, and 87                                                                         |
| Miscellaneous                                                | 30, 31, 32, 33, 34, 39, 70, 71, 72, 75, 76, 78, 79, 80, 81, 82, 83, 89, 91, 94, 95, 96, and 99 |
| Missing, unknown                                             | missing and 00                                                                                 |

The prevalence on KRT was presented on 31st December of each year from 2015 to 2020 and were presented twice, once including and once excluding the above mentioned countries and periods to allow for a comparison over time. The prevalence on KRT by primary renal disease was calculated for patients prevalent on 31st December, 2020.

## Bibliography

- 1) Eurostat: [www.ec.europa.eu/eurostat/data/database](http://www.ec.europa.eu/eurostat/data/database).
- 2) SAS Institute Inc., Cary, NC, USA.
- 3) Altman, D. Practical statistics for medical research. second ed. 1999, London: Chapman & Hall.
- 4) Bie O, Borgan O and Liestol K. Confidence intervals and confidence bands for the cumulative hazard rate function and their small sample properties. Scandinavian Journal of Statistics 1987; 14: 221-233.
- 5) U.S. Renal Data System,USRDS 2012 Annual Data Report: Atlas of End-Stage Renal Disease in the United States, National Institutes of Health, National Institute of Diabetes and Digestive and Kidney Diseases, Bethesda, MD, 2012.

## **Appendices**

## Appendix 1 - Grouping of primary renal diseases

| 1994 code | 1995 code | PRD group | Primary renal disease                                                                                          |
|-----------|-----------|-----------|----------------------------------------------------------------------------------------------------------------|
| 10        | 10        | I         | Glomerulonephritis; histologically NOT examined                                                                |
| 11        | 11        | I         | Focal segmental glomerulosclerosis with nephrotic syndrome in children                                         |
| 12        | 12        | I         | IgA nephropathy (proven by immunofluorescence, not code 76 or 85)                                              |
| 13        | 13        | I         | Dense deposit disease; membrano-proliferative GN; type II (proven by immunofluorescence / electron microscopy) |
| 14        | 14        | I         | Membranous nephropathy                                                                                         |
| 15        | 15        | I         | Membrano-proliferative GN; type I (proven by immunofluorescence / electron microscopy, not code 84 or 89)      |
| 16        | 16        | I         | Crescentic (extracapillary) glomerulonephritis (type I, II, III)                                               |
| 17        | 17        | I         | Focal segmental glomerulosclerosis with nephrotic syndrome in adults                                           |
| 19        | 19        | I         | Glomerulonephritis; histologically examined, not given above                                                   |
| 20        | 20        | II        | Pyelonephritis; cause not specified                                                                            |
| 21        | 21        | II        | Pyelonephritis associated with neurogenic bladder                                                              |
| 22        | 22        | II        | Pyelonephritis due to congenital obstructive uropathy with/without vesico-ureteric reflux                      |
| 23        | 23        | II        | Pyelonephritis due to acquired obstructive uropathy                                                            |
| 24        | 24        | II        | Pyelonephritis due to vesico-ureteric reflux without obstruction                                               |
| 25        | 25        | II        | Pyelonephritis due to urolithiasis                                                                             |
| 29        | 29        | II        | Pyelonephritis due to other cause                                                                              |
| 30        | 30        | VII       | Interstitial nephritis (not pyelonephritis) due to other cause, or unspecified (not mentioned above)           |
| 31        | 31        | VII       | Nephropathy (interstitial) due to analgesic drugs                                                              |
| 32        | 32        | VII       | Nephropathy (interstitial) due to cis-platinum                                                                 |
| 33        | 33        | VII       | Nephropathy (interstitial) due to cyclosporin A                                                                |
|           | 34        | VII       | Lead induced nephropathy (interstitial)                                                                        |
| 39        | 39        | VII       | Drug induced nephropathy (interstitial) not mentioned above                                                    |
| 40        | 40        | VII       | Cystic kidney disease - type unspecified                                                                       |
| 41        | 41        | III       | Polycystic kidneys; adult type (dominant)                                                                      |
| 42        | 42        | VII       | Polycystic kidneys; infantile (recessive)                                                                      |
| 43        | 43        | VII       | Medullary cystic disease; including nephronophthisis                                                           |
| 49        | 49        | VII       | Cystic kidney disease - other specified type                                                                   |
| 50        | 50        | VII       | Hereditary / Familial nephropathy - type unspecified                                                           |
| 51        | 51        | VII       | Hereditary nephritis with nerve deafness (Alport's Syndrome)                                                   |
| 52        | 52        | VII       | Cystinosis                                                                                                     |
| 53        | 53        | VII       | Primary oxalosis                                                                                               |
| 54        | 54        | VII       | Fabry's disease                                                                                                |
| 59        | 59        | VII       | Hereditary nephropathy - other specified type                                                                  |
| 60        | 60        | VII       | Renal hypoplasia (congenital) - type unspecified                                                               |
| 61        | 61        | VII       | Oligomeganephronic hypoplasia                                                                                  |
| 63        | 63        | VII       | Congenital renal dysplasia with or without urinary tract malformation                                          |
| 66        | 66        | VII       | Syndrome of agenesis of abdominal muscles (Prune Belly)                                                        |
| 70        | 70        | V         | Renal vascular disease - type unspecified                                                                      |
| 71        | 71        | IV        | Renal vascular disease due to malignant hypertension                                                           |
| 72        | 72        | IV        | Renal vascular disease due to hypertension                                                                     |
| 73        | 73        | VII       | Renal vascular disease due to polyarteritis                                                                    |
| 74        | 74        | VII       | Wegener's granulomatosis                                                                                       |
|           | 75        | VII       | Ischaemic renal disease/cholesterol embolism (1998 prd code)                                                   |
| 76        | 76        | VII       | Glomerulonephritis related to liver cirrhosis                                                                  |
|           | 78        | VII       | Cryoglobulinaemic glomerulonephritis                                                                           |
| 79        | 79        | V         | Renal vascular disease - due to other cause (not given above and not code 84-88)                               |
| 80        | 80        | VI        | Diabetes glomerulosclerosis or diabetic nephropathy - Type I                                                   |
| 81        | 80        | VI        | Diabetes glomerulosclerosis or diabetic nephropathy - Type II                                                  |
| 82        | 82        | VII       | Myelomatosis / light chain deposit disease                                                                     |
| 83        | 83        | VII       | Amyloid                                                                                                        |
| 84        | 84        | VII       | Lupus erythematosus                                                                                            |
| 85        | 85        | VII       | Henoch-Schoenlein purpura                                                                                      |
| 86        | 86        | VII       | Goodpasture's Syndrome                                                                                         |
| 87        | 87        | VII       | Systemic sclerosis (scleroderma)                                                                               |
| 88        | 88        | VII       | Haemolytic Uraemic Syndrome (including Moschowitz Syndrome)                                                    |
| 89        | 89        | VII       | Multi-system disease - other (not mentioned above)                                                             |
| 90        | 90        | VII       | Tubular necrosis (irreversible) or cortical necrosis (different from 88)                                       |
| 91        | 91        | VII       | Tuberculosis                                                                                                   |
| 92        | 92        | VII       | Gout                                                                                                           |
| 93        | 93        | VII       | Nephrocalcinosis and hypercalcaemic nephropathy                                                                |
| 94        | 94        | VII       | Balkan nephropathy                                                                                             |
| 95        | 95        | VII       | Kidney tumour                                                                                                  |
| 96        | 96        | VII       | Traumatic or surgical loss of kidney                                                                           |
| 99        | 99        | VII       | Other identified renal disorders                                                                               |
| 00        | 00        | VIII      | Chronic renal failure; aetiology uncertain                                                                     |

PRD group: I: glomerulonephritis / sclerosis; II: pyelonephritis; III: polycystic kidneys, adult type; IV: hypertension; V: renal vascular disease; VI: diabetes; VII: miscellaneous; VIII: unknown

## Appendix 2 - Grouping of primary renal disease codes 2018

### I: GLOMERULAR DISEASE

#### Code Primary renal disease

|      |                                                                                                  |
|------|--------------------------------------------------------------------------------------------------|
| 1003 | Adult nephrotic syndrome - no histology                                                          |
| 1472 | Anti-Glomerular basement membrane (GBM) disease / Goodpasture's syndrome - histologically proven |
| 1464 | Anti-Glomerular basement membrane (GBM) disease / Goodpasture's syndrome - no histology          |
| 1440 | Churg-Strauss syndrome - histologically proven                                                   |
| 1438 | Churg-Strauss syndrome - no histology                                                            |
| 1088 | Congenital nephrotic syndrome (CNS) - congenital infection                                       |
| 1057 | Congenital nephrotic syndrome (CNS) - diffuse mesangial sclerosis                                |
| 1042 | Congenital nephrotic syndrome (CNS) - Finnish type - histologically proven                       |
| 1035 | Congenital nephrotic syndrome (CNS) - Finnish type - no histology                                |
| 1061 | Congenital nephrotic syndrome (CNS) - focal segmental glomerulosclerosis (FSGS)                  |
| 1026 | Congenital nephrotic syndrome (CNS) - no histology                                               |
| 1570 | Cryoglobulinaemia secondary to hepatitis C - histologically proven                               |
| 1562 | Cryoglobulinaemia secondary to hepatitis C - no histology                                        |
| 1591 | Cryoglobulinaemia secondary to systemic disease - histologically proven                          |
| 1589 | Cryoglobulinaemia secondary to systemic disease - no histology                                   |
| 1074 | Denys-Drash syndrome                                                                             |
| 1331 | Diffuse endocapillary glomerulonephritis                                                         |
| 1558 | Essential mixed cryoglobulinaemia - histologically proven                                        |
| 1543 | Essential mixed cryoglobulinaemia - no histology                                                 |
| 1308 | Familial focal segmental glomerulosclerosis (FSGS) - autosomal dominant - histologically proven  |
| 1298 | Familial focal segmental glomerulosclerosis (FSGS) - autosomal dominant - no histology           |
| 1280 | Familial focal segmental glomerulosclerosis (FSGS) - autosomal recessive - histologically proven |
| 1279 | Familial focal segmental glomerulosclerosis (FSGS) - autosomal recessive - no histology          |
| 1144 | Familial IgA nephropathy - histologically proven                                                 |
| 1137 | Familial IgA nephropathy - no histology                                                          |
| 1354 | Focal and segmental proliferative glomerulonephritis                                             |
| 3754 | Focal segmental glomerulosclerosis (FSGS) secondary to HIV                                       |
| 3765 | Focal segmental glomerulosclerosis (FSGS) secondary to lithium                                   |
| 1320 | Focal segmental glomerulosclerosis (FSGS) secondary to obesity - histologically proven           |
| 1312 | Focal segmental glomerulosclerosis (FSGS) secondary to obesity - no histology                    |
| 3777 | Focal segmental glomerulosclerosis (FSGS) secondary to sickle cell                               |
| 1377 | Glomerulonephritis - histologically indeterminate                                                |
| 3749 | Glomerulonephritis - no histology                                                                |
| 1365 | Glomerulonephritis - secondary to systemic disease                                               |
| 1417 | Granulomatosis with polyangiitis - histologically proven                                         |
| 1401 | Granulomatosis with polyangiitis - no histology                                                  |
| 1515 | Henoch-Schönlein purpura / nephritis - histologically proven                                     |
| 1504 | Henoch-Schönlein purpura / nephritis - no histology                                              |
| 1251 | Idiopathic rapidly progressive (crescentic) glomerulonephritis                                   |
| 1128 | IgA nephropathy - histologically proven                                                          |
| 1116 | IgA nephropathy - no histology                                                                   |
| 1163 | IgA nephropathy secondary to liver cirrhosis - histologically proven                             |
| 1159 | IgA nephropathy secondary to liver cirrhosis - no histology                                      |
| 1171 | IgM - associated nephropathy                                                                     |
| 1205 | Membranous nephropathy - drug induced                                                            |
| 1185 | Membranous nephropathy - idiopathic                                                              |
| 1214 | Membranous nephropathy - infection associated                                                    |
| 1192 | Membranous nephropathy - malignancy associated                                                   |
| 1349 | Mesangial proliferative glomerulonephritis                                                       |
| 1222 | Mesangiocapillary glomerulonephritis type 1                                                      |
| 1233 | Mesangiocapillary glomerulonephritis type 2 (dense deposit disease)                              |
| 1246 | Mesangiocapillary glomerulonephritis type 3                                                      |
| 1429 | Microscopic polyangiitis - histologically proven                                                 |
| 1100 | Minimal change nephropathy - histologically proven                                               |
| 1090 | Minimal change nephropathy - no histology                                                        |
| 3615 | Nephrotic syndrome of childhood - no trial of steroids - no histology                            |
| 3604 | Nephrotic syndrome of childhood - steroid resistant - no histology                               |
| 1019 | Nephrotic syndrome of childhood - steroid sensitive - no histology                               |
| 1455 | Polyarteritis nodosa                                                                             |
| 1267 | Primary focal segmental glomerulosclerosis (FSGS)                                                |
| 1536 | Renal scleroderma / systemic sclerosis - histologically proven                                   |
| 1527 | Renal scleroderma / systemic sclerosis - no histology                                            |
| 1493 | Systemic lupus erythematosus / nephritis - histologically proven                                 |
| 1486 | Systemic lupus erythematosus / nephritis - no histology                                          |
| 1383 | Systemic vasculitis - ANCA negative - histologically proven                                      |
| 3847 | Systemic vasculitis - ANCA negative - no histology                                               |
| 3852 | Systemic vasculitis - ANCA positive - histologically proven                                      |
| 1396 | Systemic vasculitis - ANCA positive - no histology                                               |

---

**II: TUBULOINTERSTITIAL DISEASE****Code Primary renal disease**

---

|      |                                                                                                     |
|------|-----------------------------------------------------------------------------------------------------|
| 1768 | Acquired obstructive nephropathy due to neurogenic bladder                                          |
| 1752 | Acquired obstructive uropathy / nephropathy                                                         |
| 2196 | Acute urate nephropathy - histologically proven                                                     |
| 2183 | Acute urate nephropathy - no histology                                                              |
| 1995 | Aristolochic acid nephropathy (Balkan / Chinese herb / endemic nephropathy) - histologically proven |
| 1982 | Aristolochic acid nephropathy (Balkan / Chinese herb / endemic nephropathy) - no histology          |
| 1710 | Bladder exstrophy                                                                                   |
| 1845 | Calcium oxalate urolithiasis                                                                        |
| 1832 | Calculus nephropathy / urolithiasis                                                                 |
| 2203 | Chronic urate nephropathy - histologically proven                                                   |
| 3636 | Chronic urate nephropathy - no histology                                                            |
| 1625 | Congenital dysplasia / hypoplasia                                                                   |
| 1706 | Congenital neurogenic bladder                                                                       |
| 1660 | Congenital pelvi-ureteric junction obstruction                                                      |
| 1673 | Congenital vesico-ureteric junction obstruction                                                     |
| 2005 | Drug-induced tubulointerstitial nephritis - no histology                                            |
| 2014 | Drug-induced tubulointerstitial nephritis - histologically proven                                   |
| 1850 | Enteric hyperoxaluria                                                                               |
| 1911 | Familial interstitial nephropathy - histologically proven                                           |
| 1907 | Familial interstitial nephropathy - no histology                                                    |
| 1618 | Familial reflux nephropathy                                                                         |
| 1656 | Glomerulocystic disease                                                                             |
| 2257 | Hantavirus nephropathy                                                                              |
| 3662 | Hypercalcaemic nephropathy                                                                          |
| 1813 | Idiopathic retroperitoneal fibrosis                                                                 |
| 2177 | Lead induced nephropathy - histologically proven                                                    |
| 2165 | Lead induced nephropathy - no histology                                                             |
| 2242 | Leptospirosis                                                                                       |
| 1866 | Magnesium ammonium phosphate (struvite) urolithiasis                                                |
| 1723 | Megacystis-megaureter                                                                               |
| 1639 | Multicystic dysplastic kidneys                                                                      |
| 2098 | Nephropathy due to aminoglycosides - histologically proven                                          |
| 2080 | Nephropathy due to aminoglycosides - no histology                                                   |
| 2112 | Nephropathy due to amphotericin - histologically proven                                             |
| 2108 | Nephropathy due to amphotericin - no histology                                                      |
| 2033 | Nephropathy due to analgesic drugs - histologically proven                                          |
| 2022 | Nephropathy due to analgesic drugs - no histology                                                   |
| 2051 | Nephropathy due to ciclosporin - histologically proven                                              |
| 2046 | Nephropathy due to ciclosporin - no histology                                                       |
| 2131 | Nephropathy due to cisplatin - histologically proven                                                |
| 2120 | Nephropathy due to cisplatin - no histology                                                         |
| 2154 | Nephropathy due to lithium - histologically proven                                                  |
| 2149 | Nephropathy due to lithium - no histology                                                           |
| 2079 | Nephropathy due to tacrolimus - histologically proven                                               |
| 2067 | Nephropathy due to tacrolimus - no histology                                                        |
| 2288 | Nephropathy related to HIV - histologically proven                                                  |
| 2274 | Nephropathy related to HIV - no histology                                                           |
| 1799 | Obstructive nephropathy due to bladder cancer                                                       |
| 1809 | Obstructive nephropathy due to other malignancies                                                   |
| 1781 | Obstructive nephropathy due to prostate cancer                                                      |
| 1775 | Obstructive nephropathy due to prostatic hypertrophy                                                |
| 1734 | Oligomeganephronia                                                                                  |
| 2300 | Other specific infection                                                                            |
| 1687 | Posterior urethral valves                                                                           |
| 1602 | Primary reflux nephropathy - sporadic                                                               |
| 2219 | Radiation nephritis                                                                                 |
| 2226 | Renal / perinephric abscess                                                                         |
| 3627 | Renal cysts and diabetes syndrome                                                                   |
| 1641 | Renal dysplasia due to fetal ACE-inhibitor exposure                                                 |
| 1747 | Renal papillary necrosis                                                                            |
| 3796 | Renal papillary necrosis caused by analgesics                                                       |
| 3783 | Renal papillary necrosis caused by diabetes                                                         |
| 3806 | Renal papillary necrosis caused by sickle cell                                                      |
| 1976 | Renal sarcoidosis - histologically proven                                                           |
| 1969 | Renal sarcoidosis - no histology                                                                    |

---

**II: TUBULOINTERSTITIAL DISEASE (continued)****Code Primary renal disease**

---

|      |                                                                                         |
|------|-----------------------------------------------------------------------------------------|
| 2235 | Renal tuberculosis                                                                      |
| 3689 | Retroperitoneal fibrosis secondary to drugs                                             |
| 1821 | Retroperitoneal fibrosis secondary to malignancies                                      |
| 3670 | Retroperitoneal fibrosis secondary to peri-aortitis                                     |
| 2290 | Schistosomiasis                                                                         |
| 1694 | Syndrome of agenesis of abdominal muscles - prune belly syndrome                        |
| 1897 | Tubulointerstitial nephritis - histologically proven                                    |
| 1884 | Tubulointerstitial nephritis - no histology                                             |
| 1930 | Tubulointerstitial nephritis associated with autoimmune disease - histologically proven |
| 1924 | Tubulointerstitial nephritis associated with autoimmune disease - no histology          |
| 1953 | Tubulointerstitial nephritis with uveitis (TINU) - histologically proven                |
| 1948 | Tubulointerstitial nephritis with uveitis (TINU) - no histology                         |
| 1878 | Uric acid urolithiasis                                                                  |
| 2261 | Xanthogranulomatous pyelonephritis                                                      |

---

**III: DIABETES MELLITUS****Code Primary renal disease**

---

|      |                                                                  |
|------|------------------------------------------------------------------|
| 2328 | Diabetic nephropathy in type I diabetes - histologically proven  |
| 2316 | Diabetic nephropathy in type I diabetes - no histology           |
| 2344 | Diabetic nephropathy in type II diabetes - histologically proven |
| 2337 | Diabetic nephropathy in type II diabetes - no histology          |

---

**IV: HYPERTENSION / RENAL VASCULAR DISEASE****Code Primary renal disease**

---

|      |                                                                                                   |
|------|---------------------------------------------------------------------------------------------------|
| 2392 | Ageing kidney - no histology                                                                      |
| 2448 | Atheroembolic renal disease - histologically proven                                               |
| 2430 | Atheroembolic renal disease - no histology                                                        |
| 2363 | Chronic hypertensive nephropathy - histologically proven                                          |
| 2359 | Chronic hypertensive nephropathy - no histology                                                   |
| 2453 | Fibromuscular dysplasia of renal artery                                                           |
| 2407 | Ischaemic nephropathy - no histology                                                              |
| 2411 | Ischaemic nephropathy / microvascular disease - histologically proven                             |
| 2385 | Malignant hypertensive nephropathy / accelerated hypertensive nephropathy - histologically proven |
| 2371 | Malignant hypertensive nephropathy / accelerated hypertensive nephropathy - no histology          |
| 2469 | Renal arterial thrombosis / occlusion                                                             |
| 2424 | Renal artery stenosis                                                                             |

---

**V: OTHER SYSTEMIC DISEASES AFFECTING THE KIDNEY****Code Primary renal disease**

---

|      |                                                                                                                 |
|------|-----------------------------------------------------------------------------------------------------------------|
| 2513 | AA amyloid secondary to chronic inflammation                                                                    |
| 2521 | AL amyloid secondary to plasma cell dyscrasia                                                                   |
| 2623 | Atypical haemolytic uraemic syndrome (HUS) - diarrhoea negative                                                 |
| 2482 | Cardiorenal syndrome                                                                                            |
| 2652 | Congenital haemolytic uraemic syndrome (HUS)                                                                    |
| 2566 | Familial AA amyloid secondary to familial Mediterranean fever / TRAPS (Hibernian fever) - histologically proven |
| 2550 | Familial AA amyloid secondary to familial Mediterranean fever / TRAPS (Hibernian fever) - no histology          |
| 2545 | Familial amyloid secondary to protein mutations - histologically proven                                         |
| 2532 | Familial amyloid secondary to protein mutations - no histology                                                  |
| 2668 | Familial haemolytic uraemic syndrome (HUS)                                                                      |
| 2675 | Familial thrombotic thrombocytopenic purpura (TTP)                                                              |
| 2610 | Haemolytic uraemic syndrome (HUS) - diarrhoea associated                                                        |
| 2647 | Haemolytic uraemic syndrome (HUS) secondary to systemic disease                                                 |
| 2495 | Hepatorenal syndrome                                                                                            |
| 2606 | Immunotactoid / fibrillary nephropathy                                                                          |
| 2597 | Light chain deposition disease                                                                                  |
| 2584 | Myeloma cast nephropathy - histologically proven                                                                |
| 2578 | Myeloma kidney - no histology                                                                                   |
| 2681 | Nephropathy due to eclampsia                                                                                    |
| 3834 | Nephropathy due to pre-eclampsia                                                                                |
| 2509 | Renal amyloidosis                                                                                               |
| 2476 | Renal vein thrombosis                                                                                           |
| 2702 | Sickle cell nephropathy - histologically proven                                                                 |
| 2699 | Sickle cell nephropathy - no histology                                                                          |
| 2634 | Thrombotic thrombocytopenic purpura (TTP)                                                                       |

---

**VI: FAMILIAL / HEREDITARY NEPHROPATHIES****Code Primary renal disease**

---

|      |                                                                                   |
|------|-----------------------------------------------------------------------------------|
| 3071 | Alagille syndrome                                                                 |
| 2760 | Alport syndrome - histologically proven                                           |
| 2756 | Alport syndrome - no histology                                                    |
| 3118 | Apparent mineralocorticoid excess                                                 |
| 2718 | Autosomal dominant (AD) polycystic kidney disease                                 |
| 2725 | Autosomal dominant (AD) polycystic kidney disease type I                          |
| 2739 | Autosomal dominant (AD) polycystic kidney disease type II                         |
| 2741 | Autosomal recessive (AR) polycystic kidney disease                                |
| 3085 | Bartter syndrome                                                                  |
| 2773 | Benign familial haematuria                                                        |
| 3322 | Branchio-oto-renal syndrome                                                       |
| 2794 | Cystic kidney disease                                                             |
| 2964 | Cystinosis                                                                        |
| 2955 | Cystinuria                                                                        |
| 2929 | Dent disease                                                                      |
| 3028 | Distal renal tubular acidosis (RTA) - type I                                      |
| 3037 | Distal renal tubular acidosis with sensorineural deafness - gene mutations        |
| 3230 | Fabry disease - histologically proven                                             |
| 3224 | Fabry disease - no histology                                                      |
| 3173 | Familial hypercalciuric hypocalcaemia                                             |
| 3160 | Familial hypocalciuric hypercalcaemia                                             |
| 3187 | Familial hypomagnesaemia                                                          |
| 3379 | Familial nephropathy                                                              |
| 3314 | Frasier syndrome                                                                  |
| 3092 | Gitelman syndrome                                                                 |
| 3125 | Glucocorticoid suppressible hyperaldosteronism                                    |
| 3305 | Horse-shoe kidney                                                                 |
| 2993 | Hypophosphataemic rickets autosomal recessive (AR)                                |
| 2986 | Hypophosphataemic rickets X-linked (XL)                                           |
| 3139 | Inherited / genetic diabetes mellitus type II                                     |
| 2940 | Inherited aminoaciduria                                                           |
| 2972 | Inherited renal glycosuria                                                        |
| 3810 | Kidney stones due to ARPT deficiency                                              |
| 3351 | Lawrence-Moon-Biedl / Bardet-Biedl syndrome                                       |
| 3059 | Lesch Nyhan syndrome - hypoxanthine guanine phosphoribosyl transferase deficiency |
| 3102 | Liddle syndrome                                                                   |
| 2938 | Lowe syndrome (oculocerebrorenal syndrome)                                        |
| 2804 | Medullary cystic kidney disease type I                                            |
| 2815 | Medullary cystic kidney disease type II                                           |
| 3295 | Medullary sponge kidneys                                                          |
| 3367 | Mitochondrial cytopathy                                                           |
| 3253 | Nail-patella syndrome                                                             |
| 3044 | Nephrogenic diabetes insipidus                                                    |
| 2836 | Nephronophthisis                                                                  |
| 2843 | Nephronophthisis - type 1 (juvenile type)                                         |
| 2858 | Nephronophthisis - type 2 (infantile type)                                        |
| 2862 | Nephronophthisis - type 3 (adolescent type)                                       |
| 2870 | Nephronophthisis - type 4 (juvenile type)                                         |
| 2889 | Nephronophthisis - type 5                                                         |
| 2891 | Nephronophthisis - type 6                                                         |
| 3063 | Phosphoribosyl pyrophosphate synthetase (PRPPS) superactivity                     |
| 2901 | Primary Fanconi syndrome                                                          |
| 3194 | Primary hyperoxaluria                                                             |
| 3207 | Primary hyperoxaluria type I                                                      |
| 3211 | Primary hyperoxaluria type II                                                     |
| 3731 | Primary hyperoxaluria type III                                                    |
| 3000 | Primary renal tubular acidosis (RTA)                                              |
| 3016 | Proximal renal tubular acidosis (RTA) - type II                                   |
| 3141 | Pseudohypoaldosteronism type 1                                                    |
| 3156 | Pseudohypoaldosteronism type 2 (Gordon syndrome)                                  |
| 3658 | Renal coloboma syndrome                                                           |
| 3269 | Rubinstein-Taybi syndrome                                                         |
| 2787 | Thin basement membrane disease                                                    |
| 3346 | Townes-Brocks syndrome                                                            |
| 3276 | Tuberous sclerosis                                                                |
| 2917 | Tubular disorder as part of inherited metabolic diseases                          |
| 2827 | Uromodulin-associated nephropathy (familial juvenile hyperuricaemic nephropathy)  |
| 3282 | Von Hippel-Lindau disease                                                         |
| 3333 | Williams syndrome                                                                 |
| 3248 | Xanthinuria                                                                       |



---

**VII: MISCELLANEOUS RENAL DISORDERS**

| <b>Code</b> | <b>Primary renal disease</b>                                                                                       |
|-------------|--------------------------------------------------------------------------------------------------------------------|
| 3442        | Acute cortical necrosis                                                                                            |
| 3380        | Acute kidney injury                                                                                                |
| 3403        | Acute kidney injury due to circulatory failure                                                                     |
| 3398        | Acute kidney injury due to hypovolaemia                                                                            |
| 3435        | Acute kidney injury due to nephrotoxicity                                                                          |
| 3426        | Acute kidney injury due to rhabdomyolysis                                                                          |
| 3419        | Acute kidney injury due to sepsis                                                                                  |
| 3457        | Acute pyelonephritis                                                                                               |
| 3564        | Chronic kidney disease (CKD) / chronic renal failure (CRF) - aetiology uncertain / unknown - histologically proven |
| 3555        | Chronic kidney disease (CKD) / chronic renal failure (CRF) - aetiology uncertain / unknown - no histology          |
| 3529        | Chronic kidney disease (CKD) / chronic renal failure (CRF) caused by tumour nephrectomy                            |
| 3540        | Chronic kidney disease (CKD) / chronic renal failure (CRF) due to donor nephrectomy                                |
| 3538        | Chronic kidney disease (CKD) / chronic renal failure (CRF) due to traumatic loss of kidney                         |
| 3708        | Chronic renal failure                                                                                              |
| 3643        | Chronic renal failure due to systemic infection                                                                    |
| 3572        | Haematuria and proteinuria - no histology                                                                          |
| 3823        | Infiltration by lymphoma - histologically proven                                                                   |
| 3712        | Isolated haematuria - no histology                                                                                 |
| 3720        | Isolated proteinuria - no histology                                                                                |
| 3461        | Kidney tumour                                                                                                      |
| 3501        | Mesoblastic nephroma - histologically proven                                                                       |
| 3474        | Renal cell carcinoma - histologically proven                                                                       |
| 3691        | Renal failure                                                                                                      |
| 3517        | Single kidney identified in adulthood                                                                              |
| 3488        | Transitional cell carcinoma - histologically proven                                                                |
| 3490        | Wilms tumour - histologically proven                                                                               |

---

## Appendix 3 - Grouping of causes of death

| 1994 code | 1995 code | COD group | Cause of death                                                      |
|-----------|-----------|-----------|---------------------------------------------------------------------|
| 0         | 0         | XI        | Cause of death uncertain / not determined                           |
| 11        | 11        | I         | Myocardial ischaemia and infarction                                 |
| 12        | 12        | X         | Hyperkalaemia                                                       |
| 13        | 13        | X         | Haemorrhagic pericarditis                                           |
| 14        | 14        | II        | Other causes of cardiac failure                                     |
| 15        | 15        | III       | Cardiac arrest / sudden death; other cause or unknown               |
| 16        | 16        | II        | Hypertensive cardiac failure                                        |
| 17        | 17        | X         | Hypokalaemia                                                        |
| 18        | 18        | II        | Fluid overload / pulmonary oedema                                   |
| 21        | 21        | X         | Pulmonary embolus                                                   |
| 22        | 22        | IV        | Cerebro-vascular accident, other cause or unspecified               |
| 23        | 23        | X         | Gastro-intestinal haemorrhage                                       |
| 24        | 24        | X         | Haemorrhage from graft site                                         |
| 25        | 25        | X         | Haemorrhage from vascular access or dialysis circuit                |
| 26        | 26        | X         | Haemorrhage from ruptured vascular aneurysm (not code 22 or 23)     |
| 27        | 27        | X         | Haemorrhage from surgery (not code 23, 24 or 26)                    |
| 28        | 28        | X         | Other haemorrhage (not codes 23-27)                                 |
| 29        | 29        | X         | Mesenteric infarction                                               |
| 31        | 31        | V         | Pulmonary infection (bacterial - not code 73)                       |
| 32        | 32        | V         | Pulmonary infection (viral)                                         |
| 33        | 33        | V         | Pulmonary infection (fungal or protozoal; parasitic)                |
| 34        |           | V         | Infections elsewhere except virus hepatitis                         |
| 35        | 35        | V         | Septicaemia                                                         |
| 36        | 36        | V         | Tuberculosis (lung)                                                 |
| 37        | 37        | V         | Tuberculosis (elsewhere)                                            |
| 38        | 38        | V         | Generalized viral infection                                         |
| 39        | 39        | V         | Peritonitis (all causes except for Peritoneal Dialysis)             |
| 41        | 41        | X         | Liver disease due to hepatitis B virus                              |
| 42        | 42        | X         | Liver disease due to other viral hepatitis                          |
| 43        | 43        | X         | Liver disease due to drug toxicity                                  |
| 44        | 44        | X         | Cirrhosis - not viral                                               |
| 45        | 45        | X         | Cystic liver disease                                                |
| 46        | 46        | X         | Liver failure - cause unknown                                       |
| 51        | 51        | VI        | Patient refused further treatment for ESRF                          |
| 52        | 52        | VI        | Suicide                                                             |
| 53        | 53        | VII       | ESRF treatment ceased for any other reason                          |
|           | 54        | VII       | ESRF treatment withdrawn for medical reasons                        |
| 61        |           | X         | Uremia caused by graft failure                                      |
| 62        | 62        | X         | Pancreatitis                                                        |
| 63        | 63        | X         | Bone marrow depression                                              |
| 64        | 64        | VIII      | Cachexia                                                            |
| 66        | 66        | IX        | Malignant disease, possibly induced by immunosuppressive therapy    |
| 67        | 67        | IX        | Malignant disease: solid tumors except those of 66                  |
|           | 68        | IX        | Malignant disease: lymphoproliferative disorders except those of 66 |
| 69        | 69        | X         | Dementia                                                            |
| 70        | 70        | V         | Peritonitis (sclerosing, with peritoneal dialysis)                  |
| 71        | 71        | X         | Perforation of peptic ulcer                                         |
| 72        | 72        | X         | Perforation of colon                                                |
| 73        | 73        | X         | Chronic obstructive airways disease                                 |
| 81        | 81        | X         | Accident related to ESRF treatment (not code 25)                    |
| 82        | 82        | X         | Accident unrelated to ESRF treatment                                |
|           | 100       | V         | Peritonitis (bacterial, with peritoneal dialysis)                   |
|           | 101       | V         | Peritonitis (fungal, with peritoneal dialysis)                      |
|           | 102       | V         | Peritonitis (due to other cause, with peritoneal dialysis)          |
| 99        | 99        | X         | Other identified cause of death                                     |

*COD group: I: myocardial ischaemia and infarction; II: heart failure; III: cardiac arrest, other cause / unknown; IV: cerebrovascular accident; V: infection; VI: suicide / refusal treatment; VII: withdrawal; VIII: cachexia; IX: malignancies; X: miscellaneous; XI: unknown / unavailable*

## Appendix 4 - Event type codes

---

| Event code | Event |
|------------|-------|
|------------|-------|

---

|     |                                                                       |
|-----|-----------------------------------------------------------------------|
| 001 | Home haemodialysis                                                    |
| 002 | Centre haemodialysis                                                  |
| 003 | Haemofiltration                                                       |
| 004 | Haemodiafiltration                                                    |
| 009 | Haemodialysis, type unknown                                           |
| 011 | Continuous Ambulatory Peritoneal Dialysis (CAPD)                      |
| 012 | Intermittent Ambulatory Peritoneal Dialysis (CAPD)                    |
| 013 | Continuous Automated Peritoneal Dialysis (APD)                        |
| 014 | Intermittent Automated Peritoneal Dialysis (APD)                      |
| 019 | Peritoneal Dialysis, type unknown                                     |
| 090 | Unknown dialysis                                                      |
| 020 | Transplantation, living donor                                         |
| 021 | Transplantation, living related donor                                 |
| 022 | Transplantation, living unrelated donor                               |
| 023 | Transplantation, deceased donor                                       |
| 029 | Transplantation, donor type unknown                                   |
| 060 | Transplantation follow-up (still functioning)                         |
| 061 | Graft failure                                                         |
| 031 | Treatment type unknown / unavailable                                  |
| 051 | Recovery Renal Function                                               |
| 052 | Death                                                                 |
| 053 | Transfer out to other registry                                        |
| 054 | Transfer in from other registry                                       |
| 055 | Lost to follow-up                                                     |
| 071 | Limited care / stopped treatment (without recovery of renal function) |

---

## Appendix 5 - Renal registries contributing data for the different types of analyses

|                                  | Registries providing individual patient data |          |                              | Registries providing aggregated data | Registries providing paediatric data |
|----------------------------------|----------------------------------------------|----------|------------------------------|--------------------------------------|--------------------------------------|
|                                  | Incidence and prevalence                     | Survival | Expected remaining lifetimes | Incidence and prevalence             | Incidence and prevalence             |
| Albania                          | -                                            | -        | -                            | +                                    | -                                    |
| Austria                          | +                                            | +        | +                            | -                                    | +                                    |
| Belarus                          | -                                            | -        | -                            | +                                    | -                                    |
| Belgium, Dutch-speaking          | +                                            | +        | +                            | -                                    | -                                    |
| Belgium, French-speaking         | +                                            | +        | +                            | -                                    | -                                    |
| Bosnia and Herzegovina           | +                                            | +        | +                            | -                                    | +                                    |
| Croatia                          | -                                            | -        | -                            | +                                    | -                                    |
| Cyprus                           | -                                            | -        | -                            | +                                    | -                                    |
| Czech Republic                   | -                                            | -        | -                            | +                                    | -                                    |
| Denmark                          | +                                            | +        | +                            | -                                    | +                                    |
| Estonia                          | +                                            | +        | +                            | -                                    | +                                    |
| Finland                          | +                                            | +        | +                            | -                                    | +                                    |
| France                           | +                                            | +        | +                            | -                                    | +                                    |
| Greece                           | +                                            | +        | +                            | -                                    | +                                    |
| Hungary                          | -                                            | -        | -                            | +                                    | -                                    |
| Iceland                          | +                                            | +        | +                            | -                                    | +                                    |
| Israel                           | -                                            | -        | -                            | +                                    | -                                    |
| Italy (8 of 20 regions)          | -                                            | -        | -                            | +                                    | -                                    |
| Kosovo                           | -                                            | -        | -                            | +                                    | -                                    |
| Lithuania                        | -                                            | -        | -                            | +                                    | -                                    |
| Montenegro                       | +                                            | -        | -                            | -                                    | +                                    |
| North Macedonia                  | -                                            | -        | -                            | +                                    | -                                    |
| Norway                           | +                                            | +        | +                            | -                                    | +                                    |
| Poland                           | -                                            | -        | -                            | +                                    | -                                    |
| Portugal                         | -                                            | -        | -                            | +                                    | -                                    |
| Romania                          | +                                            | -        | -                            | -                                    | +                                    |
| Russia                           | -                                            | -        | -                            | +                                    | -                                    |
| Serbia                           | +                                            | -        | -                            | -                                    | +                                    |
| Slovakia                         | -                                            | -        | -                            | +                                    | -                                    |
| Spain, Andalusia                 | +                                            | +        | +                            | +                                    | +                                    |
| Spain, Aragon                    | +                                            | +        | +                            | +                                    | +                                    |
| Spain, Asturias                  | +                                            | +        | +                            | +                                    | +                                    |
| Spain, Balearic Islands          | -                                            | -        | -                            | +                                    | -                                    |
| Spain, Basque country            | +                                            | +        | +                            | +                                    | +                                    |
| Spain, Canary Islands            | +                                            | -        | -                            | +                                    | +                                    |
| Spain, Cantabria                 | +                                            | +        | +                            | +                                    | -                                    |
| Spain, Castile and León          | +                                            | +        | +                            | +                                    | -                                    |
| Spain, Castile-La Mancha         | +                                            | +        | +                            | +                                    | -                                    |
| Spain, Catalonia                 | +                                            | +        | +                            | +                                    | +                                    |
| Spain, Ceuta                     | -                                            | -        | -                            | +                                    | -                                    |
| Spain, Community of Madrid       | +                                            | +        | +                            | +                                    | +                                    |
| Spain, Extremadura               | +                                            | +        | +                            | +                                    | +                                    |
| Spain, Galicia                   | +                                            | +        | +                            | +                                    | +                                    |
| Spain, La Rioja                  | +                                            | -        | -                            | +                                    | +                                    |
| Spain, Melilla                   | -                                            | -        | -                            | +                                    | -                                    |
| Spain, Murcia                    | +                                            | +        | +                            | +                                    | +                                    |
| Spain, Navarre                   | +                                            | -        | -                            | +                                    | -                                    |
| Spain, Valencian region          | +                                            | +        | +                            | +                                    | +                                    |
| Sweden                           | +                                            | +        | +                            | -                                    | +                                    |
| Switzerland                      | +                                            | -        | -                            | -                                    | -                                    |
| the Netherlands                  | +                                            | +        | +                            | -                                    | +                                    |
| Turkey                           | -                                            | -        | -                            | +                                    | -                                    |
| United Kingdom, England          | +                                            | +        | +                            | -                                    | -                                    |
| United Kingdom, Northern Ireland | +                                            | +        | +                            | -                                    | -                                    |
| United Kingdom, Scotland         | +                                            | +        | +                            | -                                    | -                                    |
| United Kingdom, Wales            | +                                            | +        | +                            | -                                    | -                                    |



ERA Registry  
Amsterdam UMC, location AMC  
Department of Medical Informatics  
PO Box 22700  
1100 DE Amsterdam  
the Netherlands

December 2022

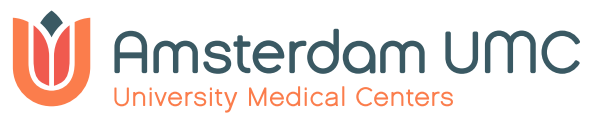

Supplement: sfad087_supplemental_file.pdf [file sfad087_supplemental_file.pdf]
